# Supplementary material for: Genome sequences reveal global dispersal routes and suggest convergent genetic adaptations in seahorse evolution
Source: Nat Commun. 2021 Feb 17;12:1094. doi: 10.1038/s41467-021-21379-x (PMC7889852; doi:10.1038/s41467-021-21379-x)
Supplement: Supplementary file 10 — Source Data [file 41467_2021_21379_MOESM10_ESM.xlsx]

## Sheet: Fig.1a
Species	Chromosome	start	end	Nucleotide diversity
H. abdominalis	Chr1	0	1999999	0.00652093
H. abdominalis	Chr1	2000000	3999999	0.00604195
H. abdominalis	Chr1	4000000	5999999	0.00601733
H. abdominalis	Chr1	6000000	7999999	0.00645207
H. abdominalis	Chr1	8000000	9999999	0.00655504
H. abdominalis	Chr1	10000000	11999999	0.00583459
H. abdominalis	Chr1	12000000	13999999	0.00612674
H. abdominalis	Chr1	14000000	15999999	0.0052932
H. abdominalis	Chr1	16000000	17999999	0.00455534
H. abdominalis	Chr1	18000000	19999999	0.00353994
H. abdominalis	Chr1	20000000	21999999	0.00453212
H. abdominalis	Chr1	22000000	23999999	0.00529773
H. abdominalis	Chr1	24000000	25999999	0.00474084
H. abdominalis	Chr1	26000000	27999999	0.00423906
H. abdominalis	Chr1	28000000	29999999	0.00455122
H. abdominalis	Chr1	30000000	31999999	0.00469603
H. abdominalis	Chr1	32000000	33999999	0.0054044
H. abdominalis	Chr1	34000000	35976506	0.0069059
H. abdominalis	Chr2	0	1999999	0.00536643
H. abdominalis	Chr2	2000000	3999999	0.0059671
H. abdominalis	Chr2	4000000	5999999	0.00649663
H. abdominalis	Chr2	6000000	7999999	0.00599489
H. abdominalis	Chr2	8000000	9999999	0.00596013
H. abdominalis	Chr2	10000000	11999999	0.00551901
H. abdominalis	Chr2	12000000	13999999	0.00588763
H. abdominalis	Chr2	14000000	15999999	0.00547727
H. abdominalis	Chr2	16000000	17999999	0.00562579
H. abdominalis	Chr2	18000000	19999999	0.00454641
H. abdominalis	Chr2	20000000	21999999	0.00497582
H. abdominalis	Chr2	22000000	23999999	0.00544782
H. abdominalis	Chr2	24000000	25999999	0.00590985
H. abdominalis	Chr2	26000000	27999999	0.00643991
H. abdominalis	Chr2	28000000	29999999	0.00652455
H. abdominalis	Chr2	30000000	31999999	0.0054732
H. abdominalis	Chr2	32000000	32585208	0.00580287
H. abdominalis	Chr3	0	1999999	0.00688892
H. abdominalis	Chr3	2000000	3999999	0.00537929
H. abdominalis	Chr3	4000000	5999999	0.0044415
H. abdominalis	Chr3	6000000	7999999	0.00478417
H. abdominalis	Chr3	8000000	9999999	0.00615699
H. abdominalis	Chr3	10000000	11999999	0.00663686
H. abdominalis	Chr3	12000000	13999999	0.006602
H. abdominalis	Chr3	14000000	15999999	0.00606185
H. abdominalis	Chr3	16000000	17999999	0.00446852
H. abdominalis	Chr3	18000000	19999999	0.00374261
H. abdominalis	Chr3	20000000	21999999	0.0042974
H. abdominalis	Chr3	22000000	22949005	0.00388012
H. abdominalis	Chr4	0	1999999	0.00485589
H. abdominalis	Chr4	2000000	3999999	0.00367566
H. abdominalis	Chr4	4000000	5999999	0.00394319
H. abdominalis	Chr4	6000000	7999999	0.00396915
H. abdominalis	Chr4	8000000	9999999	0.00469244
H. abdominalis	Chr4	10000000	11999999	0.00553074
H. abdominalis	Chr4	12000000	13999999	0.00657892
H. abdominalis	Chr4	14000000	15999999	0.0069347
H. abdominalis	Chr4	16000000	17999999	0.00827932
H. abdominalis	Chr4	18000000	19999999	0.0087039
H. abdominalis	Chr4	20000000	21418693	0.00905106
H. abdominalis	Chr5	0	1999999	0.00520984
H. abdominalis	Chr5	2000000	3999999	0.00524217
H. abdominalis	Chr5	4000000	5999999	0.00717489
H. abdominalis	Chr5	6000000	7999999	0.00550265
H. abdominalis	Chr5	8000000	9999999	0.00504877
H. abdominalis	Chr5	10000000	11999999	0.00572743
H. abdominalis	Chr5	12000000	13999999	0.00537125
H. abdominalis	Chr5	14000000	15999999	0.00500347
H. abdominalis	Chr5	16000000	17999999	0.00499734
H. abdominalis	Chr5	18000000	19988562	0.00696817
H. abdominalis	Chr6	0	1999999	0.00360295
H. abdominalis	Chr6	2000000	3999999	0.0046222
H. abdominalis	Chr6	4000000	5999999	0.0036286
H. abdominalis	Chr6	6000000	7999999	0.0036755
H. abdominalis	Chr6	8000000	9999999	0.00563207
H. abdominalis	Chr6	10000000	11999999	0.00655027
H. abdominalis	Chr6	12000000	13999999	0.00574228
H. abdominalis	Chr6	14000000	15999999	0.00460674
H. abdominalis	Chr6	16000000	17999999	0.00475968
H. abdominalis	Chr6	18000000	19999999	0.00572737
H. abdominalis	Chr6	20000000	21626043	0.00573267
H. abdominalis	Chr7	0	1999999	0.00527346
H. abdominalis	Chr7	2000000	3999999	0.0042977
H. abdominalis	Chr7	4000000	5999999	0.00580212
H. abdominalis	Chr7	6000000	7999999	0.00630906
H. abdominalis	Chr7	8000000	9999999	0.00660087
H. abdominalis	Chr7	10000000	11999999	0.00616561
H. abdominalis	Chr7	12000000	13999999	0.00558787
H. abdominalis	Chr7	14000000	15999999	0.0052041
H. abdominalis	Chr7	16000000	17999999	0.0043258
H. abdominalis	Chr7	18000000	18009646	0.0043258
H. abdominalis	Chr8	0	1999999	0.00559747
H. abdominalis	Chr8	2000000	3999999	0.0072373
H. abdominalis	Chr8	4000000	5999999	0.00477673
H. abdominalis	Chr8	6000000	7999999	0.00243706
H. abdominalis	Chr8	8000000	9999999	0.00336395
H. abdominalis	Chr8	10000000	11999999	0.00585913
H. abdominalis	Chr8	12000000	13889474	0.00699737
H. abdominalis	Chr9	0	1999999	0.00764472
H. abdominalis	Chr9	2000000	3999999	0.00596423
H. abdominalis	Chr9	4000000	5999999	0.00619941
H. abdominalis	Chr9	6000000	7999999	0.00629927
H. abdominalis	Chr9	8000000	9999999	0.00503089
H. abdominalis	Chr9	10000000	11999999	0.00502188
H. abdominalis	Chr9	12000000	13465307	0.00558403
H. abdominalis	Chr10	0	1999999	0.00607375
H. abdominalis	Chr10	2000000	3999999	0.00645614
H. abdominalis	Chr10	4000000	5999999	0.00621486
H. abdominalis	Chr10	6000000	7999999	0.00589551
H. abdominalis	Chr10	8000000	9999999	0.00846229
H. abdominalis	Chr10	10000000	11328791	0.00819548
H. abdominalis	Chr11	0	1999999	0.00614779
H. abdominalis	Chr11	2000000	3999999	0.00613653
H. abdominalis	Chr11	4000000	5999999	0.00609594
H. abdominalis	Chr11	6000000	7194405	0.00506297
H. abdominalis	Chr12	0	1999999	0.00726117
H. abdominalis	Chr12	2000000	3999999	0.00695539
H. abdominalis	Chr12	4000000	5999999	0.00576557
H. abdominalis	Chr12	6000000	7999999	0.00529229
H. abdominalis	Chr12	8000000	9999999	0.00553052
H. abdominalis	Chr12	10000000	10853637	0.00586503
H. abdominalis	Chr13	0	1999999	0.00627821
H. abdominalis	Chr13	2000000	3999999	0.00566997
H. abdominalis	Chr13	4000000	5999999	0.00532499
H. abdominalis	Chr13	6000000	7999999	0.00473295
H. abdominalis	Chr13	8000000	9999999	0.00559088
H. abdominalis	Chr13	10000000	11999999	0.00529024
H. abdominalis	Chr13	12000000	13999999	0.00508308
H. abdominalis	Chr13	14000000	15198843	0.00591551
H. abdominalis	Chr14	0	1999999	0.00538351
H. abdominalis	Chr14	2000000	3999999	0.00570875
H. abdominalis	Chr14	4000000	5999999	0.00578039
H. abdominalis	Chr14	6000000	7999999	0.00559289
H. abdominalis	Chr14	8000000	9999999	0.00522694
H. abdominalis	Chr14	10000000	11999999	0.00555871
H. abdominalis	Chr14	12000000	13999999	0.00515378
H. abdominalis	Chr14	14000000	15999999	0.00518187
H. abdominalis	Chr14	16000000	16583198	0.00548051
H. abdominalis	Chr15	0	1999999	0.00643224
H. abdominalis	Chr15	2000000	3999999	0.00653677
H. abdominalis	Chr15	4000000	5999999	0.00564634
H. abdominalis	Chr15	6000000	7999999	0.00508734
H. abdominalis	Chr15	8000000	9999999	0.00600625
H. abdominalis	Chr15	10000000	10338647	0.00561747
H. abdominalis	Chr16	0	1999999	0.00606765
H. abdominalis	Chr16	2000000	3999999	0.00528981
H. abdominalis	Chr16	4000000	5999999	0.00520347
H. abdominalis	Chr16	6000000	7999999	0.00407028
H. abdominalis	Chr16	8000000	9999999	0.00441158
H. abdominalis	Chr16	10000000	11999999	0.00563352
H. abdominalis	Chr16	12000000	13999999	0.00652139
H. abdominalis	Chr16	14000000	14659096	0.00730458
H. abdominalis	Chr17	0	1999999	0.00486292
H. abdominalis	Chr17	2000000	3999999	0.00398744
H. abdominalis	Chr17	4000000	5999999	0.00389638
H. abdominalis	Chr17	6000000	7999999	0.00435364
H. abdominalis	Chr17	8000000	9999999	0.00518948
H. abdominalis	Chr17	10000000	11999999	0.00607078
H. abdominalis	Chr17	12000000	13999999	0.00573395
H. abdominalis	Chr17	14000000	15999999	0.00529099
H. abdominalis	Chr17	16000000	17999999	0.0065421
H. abdominalis	Chr17	18000000	19999999	0.0069256
H. abdominalis	Chr17	20000000	21999999	0.00515414
H. abdominalis	Chr17	22000000	23001425	0.00790106
H. abdominalis	Chr18	0	1999999	0.00551804
H. abdominalis	Chr18	2000000	3999999	0.00537064
H. abdominalis	Chr18	4000000	5999999	0.00572674
H. abdominalis	Chr18	6000000	7999999	0.00537135
H. abdominalis	Chr18	8000000	9999999	0.00687908
H. abdominalis	Chr18	10000000	11999999	0.00607645
H. abdominalis	Chr18	12000000	13999999	0.00499025
H. abdominalis	Chr18	14000000	15999999	0.00404982
H. abdominalis	Chr18	16000000	17999999	0.00410583
H. abdominalis	Chr18	18000000	19999999	0.00614826
H. abdominalis	Chr18	20000000	20726299	0.0087357
H. abdominalis	Chr19	0	1999999	0.00601176
H. abdominalis	Chr19	2000000	3999999	0.0049985
H. abdominalis	Chr19	4000000	5999999	0.00416505
H. abdominalis	Chr19	6000000	7999999	0.00337494
H. abdominalis	Chr19	8000000	9999999	0.00311727
H. abdominalis	Chr19	10000000	11999999	0.00312066
H. abdominalis	Chr19	12000000	13999999	0.0045902
H. abdominalis	Chr19	14000000	15999999	0.00542177
H. abdominalis	Chr19	16000000	17999999	0.00532253
H. abdominalis	Chr19	18000000	19999999	0.00494707
H. abdominalis	Chr19	20000000	20521517	0.00360497
H. abdominalis	Chr20	0	1999999	0.00546031
H. abdominalis	Chr20	2000000	3999999	0.00578264
H. abdominalis	Chr20	4000000	5999999	0.00465316
H. abdominalis	Chr20	6000000	7999999	0.00439868
H. abdominalis	Chr20	8000000	9999999	0.00400983
H. abdominalis	Chr20	10000000	11999999	0.00354533
H. abdominalis	Chr20	12000000	13999999	0.0040265
H. abdominalis	Chr20	14000000	15999999	0.00461948
H. abdominalis	Chr20	16000000	17999999	0.00558349
H. abdominalis	Chr20	18000000	19096086	0.00723986
H. abdominalis	Chr21	0	1999999	0.00622905
H. abdominalis	Chr21	2000000	3999999	0.00471015
H. abdominalis	Chr21	4000000	5999999	0.00422288
H. abdominalis	Chr21	6000000	7999999	0.00415687
H. abdominalis	Chr21	8000000	9999999	0.00642742
H. abdominalis	Chr21	10000000	11999999	0.00481912
H. abdominalis	Chr21	12000000	13999999	0.00478251
H. abdominalis	Chr21	14000000	15999999	0.00546504
H. abdominalis	Chr21	16000000	17999999	0.00453617
H. abdominalis	Chr21	18000000	19999999	0.00553158
H. abdominalis	Chr21	20000000	21999999	0.00538237
H. abdominalis	Chr21	22000000	23999999	0.00468245
H. abdominalis	Chr21	24000000	25999999	0.00546842
H. abdominalis	Chr21	26000000	26406474	0.00567584
H. abdominalis	Chr22	0	1999999	0.00574031
H. abdominalis	Chr22	2000000	3999999	0.00469067
H. abdominalis	Chr22	4000000	5999999	0.00450871
H. abdominalis	Chr22	6000000	7999999	0.00456348
H. abdominalis	Chr22	8000000	9999999	0.0058268
H. abdominalis	Chr22	10000000	11999999	0.00574506
H. abdominalis	Chr22	12000000	13999999	0.00520462
H. abdominalis	Chr22	14000000	15999999	0.00529064
H. abdominalis	Chr22	16000000	17999999	0.00778556
H. abdominalis	Chr22	18000000	19999999	0.0072975
H. abdominalis	Chr22	20000000	21999999	0.00601984
H. abdominalis	Chr22	22000000	23999999	0.00585615
H. abdominalis	Chr22	24000000	24399998	0.00504573
H. aChriricus	Chr1	0	1999999	0.00632772
H. aChriricus	Chr1	2000000	3999999	0.0051539
H. aChriricus	Chr1	4000000	5999999	0.00551721
H. aChriricus	Chr1	6000000	7999999	0.00622806
H. aChriricus	Chr1	8000000	9999999	0.00681012
H. aChriricus	Chr1	10000000	11999999	0.00578535
H. aChriricus	Chr1	12000000	13999999	0.00577635
H. aChriricus	Chr1	14000000	15999999	0.00470337
H. aChriricus	Chr1	16000000	17999999	0.00408807
H. aChriricus	Chr1	18000000	19999999	0.00423359
H. aChriricus	Chr1	20000000	21999999	0.00420457
H. aChriricus	Chr1	22000000	23999999	0.00457773
H. aChriricus	Chr1	24000000	25999999	0.0044092
H. aChriricus	Chr1	26000000	27999999	0.00440717
H. aChriricus	Chr1	28000000	29999999	0.00463641
H. aChriricus	Chr1	30000000	31999999	0.00441916
H. aChriricus	Chr1	32000000	33999999	0.00555985
H. aChriricus	Chr1	34000000	35976506	0.00661577
H. aChriricus	Chr2	0	1999999	0.00427482
H. aChriricus	Chr2	2000000	3999999	0.00571929
H. aChriricus	Chr2	4000000	5999999	0.00591159
H. aChriricus	Chr2	6000000	7999999	0.00619784
H. aChriricus	Chr2	8000000	9999999	0.00581172
H. aChriricus	Chr2	10000000	11999999	0.00535901
H. aChriricus	Chr2	12000000	13999999	0.00595627
H. aChriricus	Chr2	14000000	15999999	0.00509858
H. aChriricus	Chr2	16000000	17999999	0.00480441
H. aChriricus	Chr2	18000000	19999999	0.00438442
H. aChriricus	Chr2	20000000	21999999	0.00475954
H. aChriricus	Chr2	22000000	23999999	0.00494277
H. aChriricus	Chr2	24000000	25999999	0.00544272
H. aChriricus	Chr2	26000000	27999999	0.00593388
H. aChriricus	Chr2	28000000	29999999	0.0058175
H. aChriricus	Chr2	30000000	31999999	0.00490556
H. aChriricus	Chr2	32000000	32585208	0.00557737
H. aChriricus	Chr3	0	1999999	0.00664408
H. aChriricus	Chr3	2000000	3999999	0.00523873
H. aChriricus	Chr3	4000000	5999999	0.00446566
H. aChriricus	Chr3	6000000	7999999	0.00477929
H. aChriricus	Chr3	8000000	9999999	0.00590043
H. aChriricus	Chr3	10000000	11999999	0.00632733
H. aChriricus	Chr3	12000000	13999999	0.00580853
H. aChriricus	Chr3	14000000	15999999	0.00510005
H. aChriricus	Chr3	16000000	17999999	0.00440672
H. aChriricus	Chr3	18000000	19999999	0.00409429
H. aChriricus	Chr3	20000000	21999999	0.00399787
H. aChriricus	Chr3	22000000	22949005	0.0037246
H. aChriricus	Chr4	0	1999999	0.00615928
H. aChriricus	Chr4	2000000	3999999	0.00576326
H. aChriricus	Chr4	4000000	5999999	0.00546367
H. aChriricus	Chr4	6000000	7999999	0.00483762
H. aChriricus	Chr4	8000000	9999999	0.0046764
H. aChriricus	Chr4	10000000	11999999	0.00447043
H. aChriricus	Chr4	12000000	13999999	0.0051023
H. aChriricus	Chr4	14000000	15999999	0.0048696
H. aChriricus	Chr4	16000000	17999999	0.00494869
H. aChriricus	Chr4	18000000	19999999	0.00546242
H. aChriricus	Chr4	20000000	21418693	0.00665371
H. aChriricus	Chr5	0	1999999	0.00496168
H. aChriricus	Chr5	2000000	3999999	0.00500382
H. aChriricus	Chr5	4000000	5999999	0.00629958
H. aChriricus	Chr5	6000000	7999999	0.00592923
H. aChriricus	Chr5	8000000	9999999	0.00530544
H. aChriricus	Chr5	10000000	11999999	0.00506061
H. aChriricus	Chr5	12000000	13999999	0.00524858
H. aChriricus	Chr5	14000000	15999999	0.00499085
H. aChriricus	Chr5	16000000	17999999	0.00518307
H. aChriricus	Chr5	18000000	19988562	0.00682055
H. aChriricus	Chr6	0	1999999	0.00364244
H. aChriricus	Chr6	2000000	3999999	0.00444483
H. aChriricus	Chr6	4000000	5999999	0.00396257
H. aChriricus	Chr6	6000000	7999999	0.00363923
H. aChriricus	Chr6	8000000	9999999	0.00420193
H. aChriricus	Chr6	10000000	11999999	0.00538961
H. aChriricus	Chr6	12000000	13999999	0.00490352
H. aChriricus	Chr6	14000000	15999999	0.00413473
H. aChriricus	Chr6	16000000	17999999	0.00487403
H. aChriricus	Chr6	18000000	19999999	0.00480012
H. aChriricus	Chr6	20000000	21626043	0.00483157
H. aChriricus	Chr7	0	1999999	0.00501688
H. aChriricus	Chr7	2000000	3999999	0.00475853
H. aChriricus	Chr7	4000000	5999999	0.00515135
H. aChriricus	Chr7	6000000	7999999	0.00622349
H. aChriricus	Chr7	8000000	9999999	0.00648826
H. aChriricus	Chr7	10000000	11999999	0.00589727
H. aChriricus	Chr7	12000000	13999999	0.00554372
H. aChriricus	Chr7	14000000	15999999	0.00463386
H. aChriricus	Chr7	16000000	17999999	0.00453324
H. aChriricus	Chr7	18000000	18009646	0.00453324
H. aChriricus	Chr8	0	1999999	0.00589873
H. aChriricus	Chr8	2000000	3999999	0.00588111
H. aChriricus	Chr8	4000000	5999999	0.00584564
H. aChriricus	Chr8	6000000	7999999	0.00511245
H. aChriricus	Chr8	8000000	9999999	0.00495111
H. aChriricus	Chr8	10000000	11999999	0.00622712
H. aChriricus	Chr8	12000000	13889474	0.00825992
H. aChriricus	Chr9	0	1999999	0.00757787
H. aChriricus	Chr9	2000000	3999999	0.00605251
H. aChriricus	Chr9	4000000	5999999	0.00551249
H. aChriricus	Chr9	6000000	7999999	0.0054062
H. aChriricus	Chr9	8000000	9999999	0.00529046
H. aChriricus	Chr9	10000000	11999999	0.00569895
H. aChriricus	Chr9	12000000	13465307	0.00587589
H. aChriricus	Chr10	0	1999999	0.00558964
H. aChriricus	Chr10	2000000	3999999	0.00550256
H. aChriricus	Chr10	4000000	5999999	0.0054348
H. aChriricus	Chr10	6000000	7999999	0.0053256
H. aChriricus	Chr10	8000000	9999999	0.00569362
H. aChriricus	Chr10	10000000	11328791	0.00575292
H. aChriricus	Chr11	0	1999999	0.00617175
H. aChriricus	Chr11	2000000	3999999	0.00605655
H. aChriricus	Chr11	4000000	5999999	0.00570848
H. aChriricus	Chr11	6000000	7194405	0.00502414
H. aChriricus	Chr12	0	1999999	0.00564498
H. aChriricus	Chr12	2000000	3999999	0.00589549
H. aChriricus	Chr12	4000000	5999999	0.00553611
H. aChriricus	Chr12	6000000	7999999	0.00500441
H. aChriricus	Chr12	8000000	9999999	0.00508949
H. aChriricus	Chr12	10000000	10853637	0.00560492
H. aChriricus	Chr13	0	1999999	0.00603638
H. aChriricus	Chr13	2000000	3999999	0.00564666
H. aChriricus	Chr13	4000000	5999999	0.00534582
H. aChriricus	Chr13	6000000	7999999	0.00588206
H. aChriricus	Chr13	8000000	9999999	0.00542989
H. aChriricus	Chr13	10000000	11999999	0.00511793
H. aChriricus	Chr13	12000000	13999999	0.00492914
H. aChriricus	Chr13	14000000	15198843	0.00490692
H. aChriricus	Chr14	0	1999999	0.00473262
H. aChriricus	Chr14	2000000	3999999	0.00465726
H. aChriricus	Chr14	4000000	5999999	0.00509063
H. aChriricus	Chr14	6000000	7999999	0.00548752
H. aChriricus	Chr14	8000000	9999999	0.00546953
H. aChriricus	Chr14	10000000	11999999	0.00569851
H. aChriricus	Chr14	12000000	13999999	0.00569705
H. aChriricus	Chr14	14000000	15999999	0.00489835
H. aChriricus	Chr14	16000000	16583198	0.00430825
H. aChriricus	Chr15	0	1999999	0.0055564
H. aChriricus	Chr15	2000000	3999999	0.00553092
H. aChriricus	Chr15	4000000	5999999	0.00544582
H. aChriricus	Chr15	6000000	7999999	0.00501707
H. aChriricus	Chr15	8000000	9999999	0.0057339
H. aChriricus	Chr15	10000000	10338647	0.00516623
H. aChriricus	Chr16	0	1999999	0.00536226
H. aChriricus	Chr16	2000000	3999999	0.00570737
H. aChriricus	Chr16	4000000	5999999	0.00525066
H. aChriricus	Chr16	6000000	7999999	0.00481948
H. aChriricus	Chr16	8000000	9999999	0.00445269
H. aChriricus	Chr16	10000000	11999999	0.00468403
H. aChriricus	Chr16	12000000	13999999	0.00561582
H. aChriricus	Chr16	14000000	14659096	0.00678679
H. aChriricus	Chr17	0	1999999	0.00478423
H. aChriricus	Chr17	2000000	3999999	0.00395709
H. aChriricus	Chr17	4000000	5999999	0.00396719
H. aChriricus	Chr17	6000000	7999999	0.00408277
H. aChriricus	Chr17	8000000	9999999	0.00488266
H. aChriricus	Chr17	10000000	11999999	0.00521126
H. aChriricus	Chr17	12000000	13999999	0.0052091
H. aChriricus	Chr17	14000000	15999999	0.00571079
H. aChriricus	Chr17	16000000	17999999	0.0062055
H. aChriricus	Chr17	18000000	19999999	0.00599008
H. aChriricus	Chr17	20000000	21999999	0.00499831
H. aChriricus	Chr17	22000000	23001425	0.00640131
H. aChriricus	Chr18	0	1999999	0.00472128
H. aChriricus	Chr18	2000000	3999999	0.00531471
H. aChriricus	Chr18	4000000	5999999	0.00546103
H. aChriricus	Chr18	6000000	7999999	0.00481105
H. aChriricus	Chr18	8000000	9999999	0.00493201
H. aChriricus	Chr18	10000000	11999999	0.00460151
H. aChriricus	Chr18	12000000	13999999	0.00439888
H. aChriricus	Chr18	14000000	15999999	0.00406253
H. aChriricus	Chr18	16000000	17999999	0.00433955
H. aChriricus	Chr18	18000000	19999999	0.00573103
H. aChriricus	Chr18	20000000	20726299	0.00831457
H. aChriricus	Chr19	0	1999999	0.00576537
H. aChriricus	Chr19	2000000	3999999	0.00499573
H. aChriricus	Chr19	4000000	5999999	0.00464258
H. aChriricus	Chr19	6000000	7999999	0.00354942
H. aChriricus	Chr19	8000000	9999999	0.00392842
H. aChriricus	Chr19	10000000	11999999	0.00457491
H. aChriricus	Chr19	12000000	13999999	0.00530727
H. aChriricus	Chr19	14000000	15999999	0.00546552
H. aChriricus	Chr19	16000000	17999999	0.00588984
H. aChriricus	Chr19	18000000	19999999	0.00626249
H. aChriricus	Chr19	20000000	20521517	0.00621787
H. aChriricus	Chr20	0	1999999	0.00583334
H. aChriricus	Chr20	2000000	3999999	0.00566134
H. aChriricus	Chr20	4000000	5999999	0.0055021
H. aChriricus	Chr20	6000000	7999999	0.00535759
H. aChriricus	Chr20	8000000	9999999	0.00492278
H. aChriricus	Chr20	10000000	11999999	0.00440356
H. aChriricus	Chr20	12000000	13999999	0.00480537
H. aChriricus	Chr20	14000000	15999999	0.00464047
H. aChriricus	Chr20	16000000	17999999	0.00561725
H. aChriricus	Chr20	18000000	19096086	0.00689717
H. aChriricus	Chr21	0	1999999	0.00586683
H. aChriricus	Chr21	2000000	3999999	0.0049439
H. aChriricus	Chr21	4000000	5999999	0.00360383
H. aChriricus	Chr21	6000000	7999999	0.00413075
H. aChriricus	Chr21	8000000	9999999	0.0056017
H. aChriricus	Chr21	10000000	11999999	0.0043053
H. aChriricus	Chr21	12000000	13999999	0.00492673
H. aChriricus	Chr21	14000000	15999999	0.0047538
H. aChriricus	Chr21	16000000	17999999	0.00641531
H. aChriricus	Chr21	18000000	19999999	0.00604737
H. aChriricus	Chr21	20000000	21999999	0.00585051
H. aChriricus	Chr21	22000000	23999999	0.00535629
H. aChriricus	Chr21	24000000	25999999	0.00482591
H. aChriricus	Chr21	26000000	26406474	0.00482814
H. aChriricus	Chr22	0	1999999	0.00561007
H. aChriricus	Chr22	2000000	3999999	0.00475616
H. aChriricus	Chr22	4000000	5999999	0.00413593
H. aChriricus	Chr22	6000000	7999999	0.00468643
H. aChriricus	Chr22	8000000	9999999	0.00439768
H. aChriricus	Chr22	10000000	11999999	0.00441435
H. aChriricus	Chr22	12000000	13999999	0.00442163
H. aChriricus	Chr22	14000000	15999999	0.00475036
H. aChriricus	Chr22	16000000	17999999	0.00596314
H. aChriricus	Chr22	18000000	19999999	0.00634111
H. aChriricus	Chr22	20000000	21999999	0.00622554
H. aChriricus	Chr22	22000000	23999999	0.00550111
H. aChriricus	Chr22	24000000	24399998	0.00456517
H. barbouri	Chr1	0	1999999	0.00819756
H. barbouri	Chr1	2000000	3999999	0.00661124
H. barbouri	Chr1	4000000	5999999	0.00623394
H. barbouri	Chr1	6000000	7999999	0.00653881
H. barbouri	Chr1	8000000	9999999	0.0065457
H. barbouri	Chr1	10000000	11999999	0.00658466
H. barbouri	Chr1	12000000	13999999	0.00675444
H. barbouri	Chr1	14000000	15999999	0.00580428
H. barbouri	Chr1	16000000	17999999	0.00561413
H. barbouri	Chr1	18000000	19999999	0.0046068
H. barbouri	Chr1	20000000	21999999	0.00514286
H. barbouri	Chr1	22000000	23999999	0.00545626
H. barbouri	Chr1	24000000	25999999	0.00483021
H. barbouri	Chr1	26000000	27999999	0.00497114
H. barbouri	Chr1	28000000	29999999	0.0050099
H. barbouri	Chr1	30000000	31999999	0.00519876
H. barbouri	Chr1	32000000	33999999	0.00626822
H. barbouri	Chr1	34000000	35976506	0.00843389
H. barbouri	Chr2	0	1999999	0.00559343
H. barbouri	Chr2	2000000	3999999	0.00701093
H. barbouri	Chr2	4000000	5999999	0.00629527
H. barbouri	Chr2	6000000	7999999	0.00619465
H. barbouri	Chr2	8000000	9999999	0.00694822
H. barbouri	Chr2	10000000	11999999	0.00645507
H. barbouri	Chr2	12000000	13999999	0.00665217
H. barbouri	Chr2	14000000	15999999	0.00603314
H. barbouri	Chr2	16000000	17999999	0.00566513
H. barbouri	Chr2	18000000	19999999	0.00518478
H. barbouri	Chr2	20000000	21999999	0.00594351
H. barbouri	Chr2	22000000	23999999	0.00630248
H. barbouri	Chr2	24000000	25999999	0.00706291
H. barbouri	Chr2	26000000	27999999	0.00787996
H. barbouri	Chr2	28000000	29999999	0.00761692
H. barbouri	Chr2	30000000	31999999	0.0060786
H. barbouri	Chr2	32000000	32585208	0.00700558
H. barbouri	Chr3	0	1999999	0.0087079
H. barbouri	Chr3	2000000	3999999	0.00648955
H. barbouri	Chr3	4000000	5999999	0.00596186
H. barbouri	Chr3	6000000	7999999	0.00604073
H. barbouri	Chr3	8000000	9999999	0.00566443
H. barbouri	Chr3	10000000	11999999	0.00607175
H. barbouri	Chr3	12000000	13999999	0.00646017
H. barbouri	Chr3	14000000	15999999	0.00569482
H. barbouri	Chr3	16000000	17999999	0.00529352
H. barbouri	Chr3	18000000	19999999	0.00495968
H. barbouri	Chr3	20000000	21999999	0.00525684
H. barbouri	Chr3	22000000	22949005	0.0051831
H. barbouri	Chr4	0	1999999	0.00575124
H. barbouri	Chr4	2000000	3999999	0.00696629
H. barbouri	Chr4	4000000	5999999	0.00556031
H. barbouri	Chr4	6000000	7999999	0.00543842
H. barbouri	Chr4	8000000	9999999	0.0054943
H. barbouri	Chr4	10000000	11999999	0.00539469
H. barbouri	Chr4	12000000	13999999	0.00585552
H. barbouri	Chr4	14000000	15999999	0.00588688
H. barbouri	Chr4	16000000	17999999	0.0065989
H. barbouri	Chr4	18000000	19999999	0.00736909
H. barbouri	Chr4	20000000	21418693	0.00867873
H. barbouri	Chr5	0	1999999	0.00646701
H. barbouri	Chr5	2000000	3999999	0.00637728
H. barbouri	Chr5	4000000	5999999	0.00685196
H. barbouri	Chr5	6000000	7999999	0.00580283
H. barbouri	Chr5	8000000	9999999	0.00528731
H. barbouri	Chr5	10000000	11999999	0.0058291
H. barbouri	Chr5	12000000	13999999	0.00610019
H. barbouri	Chr5	14000000	15999999	0.00607205
H. barbouri	Chr5	16000000	17999999	0.00622446
H. barbouri	Chr5	18000000	19988562	0.00859673
H. barbouri	Chr6	0	1999999	0.00499711
H. barbouri	Chr6	2000000	3999999	0.00618298
H. barbouri	Chr6	4000000	5999999	0.00533856
H. barbouri	Chr6	6000000	7999999	0.00511987
H. barbouri	Chr6	8000000	9999999	0.00515143
H. barbouri	Chr6	10000000	11999999	0.00746713
H. barbouri	Chr6	12000000	13999999	0.00767246
H. barbouri	Chr6	14000000	15999999	0.00574867
H. barbouri	Chr6	16000000	17999999	0.00592458
H. barbouri	Chr6	18000000	19999999	0.0059735
H. barbouri	Chr6	20000000	21626043	0.00641223
H. barbouri	Chr7	0	1999999	0.0060266
H. barbouri	Chr7	2000000	3999999	0.00539271
H. barbouri	Chr7	4000000	5999999	0.00719711
H. barbouri	Chr7	6000000	7999999	0.00781102
H. barbouri	Chr7	8000000	9999999	0.00755505
H. barbouri	Chr7	10000000	11999999	0.00670379
H. barbouri	Chr7	12000000	13999999	0.006168
H. barbouri	Chr7	14000000	15999999	0.00524825
H. barbouri	Chr7	16000000	17999999	0.00495021
H. barbouri	Chr7	18000000	18009646	0.00495021
H. barbouri	Chr8	0	1999999	0.00600698
H. barbouri	Chr8	2000000	3999999	0.00692881
H. barbouri	Chr8	4000000	5999999	0.00665749
H. barbouri	Chr8	6000000	7999999	0.00527742
H. barbouri	Chr8	8000000	9999999	0.0049721
H. barbouri	Chr8	10000000	11999999	0.00787603
H. barbouri	Chr8	12000000	13889474	0.0102178
H. barbouri	Chr9	0	1999999	0.0100996
H. barbouri	Chr9	2000000	3999999	0.00648087
H. barbouri	Chr9	4000000	5999999	0.00618692
H. barbouri	Chr9	6000000	7999999	0.00603082
H. barbouri	Chr9	8000000	9999999	0.00601522
H. barbouri	Chr9	10000000	11999999	0.00609081
H. barbouri	Chr9	12000000	13465307	0.00648231
H. barbouri	Chr10	0	1999999	0.00579657
H. barbouri	Chr10	2000000	3999999	0.00597176
H. barbouri	Chr10	4000000	5999999	0.00649959
H. barbouri	Chr10	6000000	7999999	0.00665312
H. barbouri	Chr10	8000000	9999999	0.00820438
H. barbouri	Chr10	10000000	11328791	0.00803263
H. barbouri	Chr11	0	1999999	0.00627345
H. barbouri	Chr11	2000000	3999999	0.00627831
H. barbouri	Chr11	4000000	5999999	0.00679908
H. barbouri	Chr11	6000000	7194405	0.00610896
H. barbouri	Chr12	0	1999999	0.00811707
H. barbouri	Chr12	2000000	3999999	0.0068035
H. barbouri	Chr12	4000000	5999999	0.00604772
H. barbouri	Chr12	6000000	7999999	0.0052653
H. barbouri	Chr12	8000000	9999999	0.00525607
H. barbouri	Chr12	10000000	10853637	0.00568697
H. barbouri	Chr13	0	1999999	0.00784207
H. barbouri	Chr13	2000000	3999999	0.00735247
H. barbouri	Chr13	4000000	5999999	0.00608966
H. barbouri	Chr13	6000000	7999999	0.00579527
H. barbouri	Chr13	8000000	9999999	0.00591179
H. barbouri	Chr13	10000000	11999999	0.005983
H. barbouri	Chr13	12000000	13999999	0.00577544
H. barbouri	Chr13	14000000	15198843	0.00678854
H. barbouri	Chr14	0	1999999	0.00598927
H. barbouri	Chr14	2000000	3999999	0.00606456
H. barbouri	Chr14	4000000	5999999	0.00615663
H. barbouri	Chr14	6000000	7999999	0.00601723
H. barbouri	Chr14	8000000	9999999	0.00542035
H. barbouri	Chr14	10000000	11999999	0.00584863
H. barbouri	Chr14	12000000	13999999	0.00606988
H. barbouri	Chr14	14000000	15999999	0.00693059
H. barbouri	Chr14	16000000	16583198	0.00625902
H. barbouri	Chr15	0	1999999	0.00644335
H. barbouri	Chr15	2000000	3999999	0.0054332
H. barbouri	Chr15	4000000	5999999	0.00516828
H. barbouri	Chr15	6000000	7999999	0.00516071
H. barbouri	Chr15	8000000	9999999	0.00752373
H. barbouri	Chr15	10000000	10338647	0.00721865
H. barbouri	Chr16	0	1999999	0.00658492
H. barbouri	Chr16	2000000	3999999	0.00615552
H. barbouri	Chr16	4000000	5999999	0.00556447
H. barbouri	Chr16	6000000	7999999	0.00522648
H. barbouri	Chr16	8000000	9999999	0.00498066
H. barbouri	Chr16	10000000	11999999	0.00548905
H. barbouri	Chr16	12000000	13999999	0.00777829
H. barbouri	Chr16	14000000	14659096	0.00893356
H. barbouri	Chr17	0	1999999	0.00589381
H. barbouri	Chr17	2000000	3999999	0.00504134
H. barbouri	Chr17	4000000	5999999	0.00478359
H. barbouri	Chr17	6000000	7999999	0.00488243
H. barbouri	Chr17	8000000	9999999	0.00566741
H. barbouri	Chr17	10000000	11999999	0.00581083
H. barbouri	Chr17	12000000	13999999	0.00573107
H. barbouri	Chr17	14000000	15999999	0.00538522
H. barbouri	Chr17	16000000	17999999	0.00631797
H. barbouri	Chr17	18000000	19999999	0.00747715
H. barbouri	Chr17	20000000	21999999	0.00674744
H. barbouri	Chr17	22000000	23001425	0.00902843
H. barbouri	Chr18	0	1999999	0.00616238
H. barbouri	Chr18	2000000	3999999	0.00706821
H. barbouri	Chr18	4000000	5999999	0.00707375
H. barbouri	Chr18	6000000	7999999	0.00615355
H. barbouri	Chr18	8000000	9999999	0.0061106
H. barbouri	Chr18	10000000	11999999	0.00566808
H. barbouri	Chr18	12000000	13999999	0.00551887
H. barbouri	Chr18	14000000	15999999	0.00527736
H. barbouri	Chr18	16000000	17999999	0.00532235
H. barbouri	Chr18	18000000	19999999	0.00804256
H. barbouri	Chr18	20000000	20726299	0.0101181
H. barbouri	Chr19	0	1999999	0.00787379
H. barbouri	Chr19	2000000	3999999	0.00646239
H. barbouri	Chr19	4000000	5999999	0.00592088
H. barbouri	Chr19	6000000	7999999	0.00470558
H. barbouri	Chr19	8000000	9999999	0.00481776
H. barbouri	Chr19	10000000	11999999	0.0048583
H. barbouri	Chr19	12000000	13999999	0.00576343
H. barbouri	Chr19	14000000	15999999	0.00635744
H. barbouri	Chr19	16000000	17999999	0.00612957
H. barbouri	Chr19	18000000	19999999	0.0072533
H. barbouri	Chr19	20000000	20521517	0.00708219
H. barbouri	Chr20	0	1999999	0.00731995
H. barbouri	Chr20	2000000	3999999	0.00626128
H. barbouri	Chr20	4000000	5999999	0.00560777
H. barbouri	Chr20	6000000	7999999	0.00561238
H. barbouri	Chr20	8000000	9999999	0.00565883
H. barbouri	Chr20	10000000	11999999	0.00541598
H. barbouri	Chr20	12000000	13999999	0.00559434
H. barbouri	Chr20	14000000	15999999	0.0063198
H. barbouri	Chr20	16000000	17999999	0.00745532
H. barbouri	Chr20	18000000	19096086	0.00885493
H. barbouri	Chr21	0	1999999	0.00784587
H. barbouri	Chr21	2000000	3999999	0.00549649
H. barbouri	Chr21	4000000	5999999	0.00485968
H. barbouri	Chr21	6000000	7999999	0.00494673
H. barbouri	Chr21	8000000	9999999	0.00672738
H. barbouri	Chr21	10000000	11999999	0.00550651
H. barbouri	Chr21	12000000	13999999	0.00553877
H. barbouri	Chr21	14000000	15999999	0.00603834
H. barbouri	Chr21	16000000	17999999	0.00681119
H. barbouri	Chr21	18000000	19999999	0.00574464
H. barbouri	Chr21	20000000	21999999	0.00585186
H. barbouri	Chr21	22000000	23999999	0.00548393
H. barbouri	Chr21	24000000	25999999	0.00547453
H. barbouri	Chr21	26000000	26406474	0.00546543
H. barbouri	Chr22	0	1999999	0.00693105
H. barbouri	Chr22	2000000	3999999	0.00574445
H. barbouri	Chr22	4000000	5999999	0.00530903
H. barbouri	Chr22	6000000	7999999	0.0056654
H. barbouri	Chr22	8000000	9999999	0.00610144
H. barbouri	Chr22	10000000	11999999	0.00599305
H. barbouri	Chr22	12000000	13999999	0.00540196
H. barbouri	Chr22	14000000	15999999	0.00571773
H. barbouri	Chr22	16000000	17999999	0.00772095
H. barbouri	Chr22	18000000	19999999	0.0075131
H. barbouri	Chr22	20000000	21999999	0.00696983
H. barbouri	Chr22	22000000	23999999	0.00608697
H. barbouri	Chr22	24000000	24399998	0.00596727
H. casscsio	Chr1	0	1999999	0.00895365
H. casscsio	Chr1	2000000	3999999	0.0102565
H. casscsio	Chr1	4000000	5999999	0.0116352
H. casscsio	Chr1	6000000	7999999	0.012371
H. casscsio	Chr1	8000000	9999999	0.0127039
H. casscsio	Chr1	10000000	11999999	0.0106643
H. casscsio	Chr1	12000000	13999999	0.00928764
H. casscsio	Chr1	14000000	15999999	0.0091994
H. casscsio	Chr1	16000000	17999999	0.00877498
H. casscsio	Chr1	18000000	19999999	0.00684789
H. casscsio	Chr1	20000000	21999999	0.00727199
H. casscsio	Chr1	22000000	23999999	0.0077193
H. casscsio	Chr1	24000000	25999999	0.00679564
H. casscsio	Chr1	26000000	27999999	0.00728727
H. casscsio	Chr1	28000000	29999999	0.00658151
H. casscsio	Chr1	30000000	31999999	0.00765081
H. casscsio	Chr1	32000000	33999999	0.00947184
H. casscsio	Chr1	34000000	35976506	0.0131306
H. casscsio	Chr2	0	1999999	0.00737523
H. casscsio	Chr2	2000000	3999999	0.0109098
H. casscsio	Chr2	4000000	5999999	0.011997
H. casscsio	Chr2	6000000	7999999	0.011763
H. casscsio	Chr2	8000000	9999999	0.0108904
H. casscsio	Chr2	10000000	11999999	0.0096614
H. casscsio	Chr2	12000000	13999999	0.00902578
H. casscsio	Chr2	14000000	15999999	0.00813139
H. casscsio	Chr2	16000000	17999999	0.00829644
H. casscsio	Chr2	18000000	19999999	0.00778563
H. casscsio	Chr2	20000000	21999999	0.00953265
H. casscsio	Chr2	22000000	23999999	0.00844921
H. casscsio	Chr2	24000000	25999999	0.00812624
H. casscsio	Chr2	26000000	27999999	0.00909583
H. casscsio	Chr2	28000000	29999999	0.00955756
H. casscsio	Chr2	30000000	31999999	0.00808543
H. casscsio	Chr2	32000000	32585208	0.00875302
H. casscsio	Chr3	0	1999999	0.00987517
H. casscsio	Chr3	2000000	3999999	0.0106714
H. casscsio	Chr3	4000000	5999999	0.00837963
H. casscsio	Chr3	6000000	7999999	0.00912793
H. casscsio	Chr3	8000000	9999999	0.0117626
H. casscsio	Chr3	10000000	11999999	0.0118556
H. casscsio	Chr3	12000000	13999999	0.0113562
H. casscsio	Chr3	14000000	15999999	0.0106536
H. casscsio	Chr3	16000000	17999999	0.00869897
H. casscsio	Chr3	18000000	19999999	0.00844637
H. casscsio	Chr3	20000000	21999999	0.00851188
H. casscsio	Chr3	22000000	22949005	0.0086484
H. casscsio	Chr4	0	1999999	0.0126323
H. casscsio	Chr4	2000000	3999999	0.012082
H. casscsio	Chr4	4000000	5999999	0.0104958
H. casscsio	Chr4	6000000	7999999	0.00990357
H. casscsio	Chr4	8000000	9999999	0.0096344
H. casscsio	Chr4	10000000	11999999	0.00861072
H. casscsio	Chr4	12000000	13999999	0.00920854
H. casscsio	Chr4	14000000	15999999	0.0094213
H. casscsio	Chr4	16000000	17999999	0.00941144
H. casscsio	Chr4	18000000	19999999	0.00944071
H. casscsio	Chr4	20000000	21418693	0.00991084
H. casscsio	Chr5	0	1999999	0.0098233
H. casscsio	Chr5	2000000	3999999	0.0106247
H. casscsio	Chr5	4000000	5999999	0.0134611
H. casscsio	Chr5	6000000	7999999	0.0119737
H. casscsio	Chr5	8000000	9999999	0.0107811
H. casscsio	Chr5	10000000	11999999	0.010352
H. casscsio	Chr5	12000000	13999999	0.0105753
H. casscsio	Chr5	14000000	15999999	0.00941428
H. casscsio	Chr5	16000000	17999999	0.0103917
H. casscsio	Chr5	18000000	19988562	0.0104096
H. casscsio	Chr6	0	1999999	0.00828958
H. casscsio	Chr6	2000000	3999999	0.0101993
H. casscsio	Chr6	4000000	5999999	0.00905558
H. casscsio	Chr6	6000000	7999999	0.00887355
H. casscsio	Chr6	8000000	9999999	0.00928049
H. casscsio	Chr6	10000000	11999999	0.0102976
H. casscsio	Chr6	12000000	13999999	0.00887954
H. casscsio	Chr6	14000000	15999999	0.00856214
H. casscsio	Chr6	16000000	17999999	0.0102442
H. casscsio	Chr6	18000000	19999999	0.0101174
H. casscsio	Chr6	20000000	21626043	0.00831188
H. casscsio	Chr7	0	1999999	0.00921018
H. casscsio	Chr7	2000000	3999999	0.00892011
H. casscsio	Chr7	4000000	5999999	0.00896359
H. casscsio	Chr7	6000000	7999999	0.011094
H. casscsio	Chr7	8000000	9999999	0.011551
H. casscsio	Chr7	10000000	11999999	0.0106345
H. casscsio	Chr7	12000000	13999999	0.0106078
H. casscsio	Chr7	14000000	15999999	0.00964849
H. casscsio	Chr7	16000000	17999999	0.00942869
H. casscsio	Chr7	18000000	18009646	0.00942869
H. casscsio	Chr8	0	1999999	0.0114906
H. casscsio	Chr8	2000000	3999999	0.0119937
H. casscsio	Chr8	4000000	5999999	0.0112564
H. casscsio	Chr8	6000000	7999999	0.0107911
H. casscsio	Chr8	8000000	9999999	0.0100063
H. casscsio	Chr8	10000000	11999999	0.0107114
H. casscsio	Chr8	12000000	13889474	0.011683
H. casscsio	Chr9	0	1999999	0.0115674
H. casscsio	Chr9	2000000	3999999	0.0116404
H. casscsio	Chr9	4000000	5999999	0.0114333
H. casscsio	Chr9	6000000	7999999	0.0105643
H. casscsio	Chr9	8000000	9999999	0.0102001
H. casscsio	Chr9	10000000	11999999	0.010851
H. casscsio	Chr9	12000000	13465307	0.0112266
H. casscsio	Chr10	0	1999999	0.0107529
H. casscsio	Chr10	2000000	3999999	0.0105282
H. casscsio	Chr10	4000000	5999999	0.00991056
H. casscsio	Chr10	6000000	7999999	0.0113044
H. casscsio	Chr10	8000000	9999999	0.0106027
H. casscsio	Chr10	10000000	11328791	0.0104016
H. casscsio	Chr11	0	1999999	0.0116341
H. casscsio	Chr11	2000000	3999999	0.0114226
H. casscsio	Chr11	4000000	5999999	0.0114001
H. casscsio	Chr11	6000000	7194405	0.0109275
H. casscsio	Chr12	0	1999999	0.00981394
H. casscsio	Chr12	2000000	3999999	0.0113011
H. casscsio	Chr12	4000000	5999999	0.0111917
H. casscsio	Chr12	6000000	7999999	0.0102476
H. casscsio	Chr12	8000000	9999999	0.0101065
H. casscsio	Chr12	10000000	10853637	0.0111827
H. casscsio	Chr13	0	1999999	0.00969312
H. casscsio	Chr13	2000000	3999999	0.0115216
H. casscsio	Chr13	4000000	5999999	0.0109092
H. casscsio	Chr13	6000000	7999999	0.010624
H. casscsio	Chr13	8000000	9999999	0.0107626
H. casscsio	Chr13	10000000	11999999	0.0106846
H. casscsio	Chr13	12000000	13999999	0.0103616
H. casscsio	Chr13	14000000	15198843	0.0116335
H. casscsio	Chr14	0	1999999	0.00941472
H. casscsio	Chr14	2000000	3999999	0.00972221
H. casscsio	Chr14	4000000	5999999	0.0102261
H. casscsio	Chr14	6000000	7999999	0.0118231
H. casscsio	Chr14	8000000	9999999	0.0127621
H. casscsio	Chr14	10000000	11999999	0.0121643
H. casscsio	Chr14	12000000	13999999	0.011739
H. casscsio	Chr14	14000000	15999999	0.00927379
H. casscsio	Chr14	16000000	16583198	0.00981921
H. casscsio	Chr15	0	1999999	0.0122596
H. casscsio	Chr15	2000000	3999999	0.0107544
H. casscsio	Chr15	4000000	5999999	0.0100516
H. casscsio	Chr15	6000000	7999999	0.00973867
H. casscsio	Chr15	8000000	9999999	0.0111749
H. casscsio	Chr15	10000000	10338647	0.0106027
H. casscsio	Chr16	0	1999999	0.0115699
H. casscsio	Chr16	2000000	3999999	0.0114128
H. casscsio	Chr16	4000000	5999999	0.010187
H. casscsio	Chr16	6000000	7999999	0.00970551
H. casscsio	Chr16	8000000	9999999	0.00956394
H. casscsio	Chr16	10000000	11999999	0.00988121
H. casscsio	Chr16	12000000	13999999	0.00942435
H. casscsio	Chr16	14000000	14659096	0.0101825
H. casscsio	Chr17	0	1999999	0.00860634
H. casscsio	Chr17	2000000	3999999	0.00747415
H. casscsio	Chr17	4000000	5999999	0.00738112
H. casscsio	Chr17	6000000	7999999	0.00816692
H. casscsio	Chr17	8000000	9999999	0.00991839
H. casscsio	Chr17	10000000	11999999	0.0105771
H. casscsio	Chr17	12000000	13999999	0.0111595
H. casscsio	Chr17	14000000	15999999	0.0114562
H. casscsio	Chr17	16000000	17999999	0.0122689
H. casscsio	Chr17	18000000	19999999	0.0123034
H. casscsio	Chr17	20000000	21999999	0.00859889
H. casscsio	Chr17	22000000	23001425	0.00962623
H. casscsio	Chr18	0	1999999	0.00983089
H. casscsio	Chr18	2000000	3999999	0.011195
H. casscsio	Chr18	4000000	5999999	0.0116829
H. casscsio	Chr18	6000000	7999999	0.0111642
H. casscsio	Chr18	8000000	9999999	0.0113109
H. casscsio	Chr18	10000000	11999999	0.0102089
H. casscsio	Chr18	12000000	13999999	0.0103957
H. casscsio	Chr18	14000000	15999999	0.00912531
H. casscsio	Chr18	16000000	17999999	0.00892109
H. casscsio	Chr18	18000000	19999999	0.00922504
H. casscsio	Chr18	20000000	20726299	0.0108788
H. casscsio	Chr19	0	1999999	0.00928019
H. casscsio	Chr19	2000000	3999999	0.00891211
H. casscsio	Chr19	4000000	5999999	0.00869023
H. casscsio	Chr19	6000000	7999999	0.0078701
H. casscsio	Chr19	8000000	9999999	0.00772198
H. casscsio	Chr19	10000000	11999999	0.00944614
H. casscsio	Chr19	12000000	13999999	0.0104963
H. casscsio	Chr19	14000000	15999999	0.0110557
H. casscsio	Chr19	16000000	17999999	0.0112846
H. casscsio	Chr19	18000000	19999999	0.0124295
H. casscsio	Chr19	20000000	20521517	0.0113784
H. casscsio	Chr20	0	1999999	0.0117283
H. casscsio	Chr20	2000000	3999999	0.0114211
H. casscsio	Chr20	4000000	5999999	0.0110816
H. casscsio	Chr20	6000000	7999999	0.0106658
H. casscsio	Chr20	8000000	9999999	0.00974735
H. casscsio	Chr20	10000000	11999999	0.00972991
H. casscsio	Chr20	12000000	13999999	0.0100811
H. casscsio	Chr20	14000000	15999999	0.0095485
H. casscsio	Chr20	16000000	17999999	0.0106356
H. casscsio	Chr20	18000000	19096086	0.00956385
H. casscsio	Chr21	0	1999999	0.00943256
H. casscsio	Chr21	2000000	3999999	0.00897931
H. casscsio	Chr21	4000000	5999999	0.00751055
H. casscsio	Chr21	6000000	7999999	0.00725237
H. casscsio	Chr21	8000000	9999999	0.00949593
H. casscsio	Chr21	10000000	11999999	0.00837205
H. casscsio	Chr21	12000000	13999999	0.00807439
H. casscsio	Chr21	14000000	15999999	0.00930637
H. casscsio	Chr21	16000000	17999999	0.0125085
H. casscsio	Chr21	18000000	19999999	0.0118066
H. casscsio	Chr21	20000000	21999999	0.0110693
H. casscsio	Chr21	22000000	23999999	0.010697
H. casscsio	Chr21	24000000	25999999	0.0103826
H. casscsio	Chr21	26000000	26406474	0.011658
H. casscsio	Chr22	0	1999999	0.0107789
H. casscsio	Chr22	2000000	3999999	0.00983433
H. casscsio	Chr22	4000000	5999999	0.00906694
H. casscsio	Chr22	6000000	7999999	0.0097953
H. casscsio	Chr22	8000000	9999999	0.0089796
H. casscsio	Chr22	10000000	11999999	0.00877567
H. casscsio	Chr22	12000000	13999999	0.00816709
H. casscsio	Chr22	14000000	15999999	0.00885964
H. casscsio	Chr22	16000000	17999999	0.0106094
H. casscsio	Chr22	18000000	19999999	0.0109198
H. casscsio	Chr22	20000000	21999999	0.0118101
H. casscsio	Chr22	22000000	23999999	0.0101507
H. casscsio	Chr22	24000000	24399998	0.00967966
H. camelopardalis	Chr1	0	1999999	0.0058014
H. camelopardalis	Chr1	2000000	3999999	0.00451143
H. camelopardalis	Chr1	4000000	5999999	0.00450264
H. camelopardalis	Chr1	6000000	7999999	0.00442191
H. camelopardalis	Chr1	8000000	9999999	0.00447317
H. camelopardalis	Chr1	10000000	11999999	0.0044656
H. camelopardalis	Chr1	12000000	13999999	0.00516776
H. camelopardalis	Chr1	14000000	15999999	0.00410155
H. camelopardalis	Chr1	16000000	17999999	0.00390357
H. camelopardalis	Chr1	18000000	19999999	0.00331858
H. camelopardalis	Chr1	20000000	21999999	0.00384793
H. camelopardalis	Chr1	22000000	23999999	0.00450667
H. camelopardalis	Chr1	24000000	25999999	0.0038346
H. camelopardalis	Chr1	26000000	27999999	0.00391081
H. camelopardalis	Chr1	28000000	29999999	0.00388571
H. camelopardalis	Chr1	30000000	31999999	0.0038994
H. camelopardalis	Chr1	32000000	33999999	0.00423553
H. camelopardalis	Chr1	34000000	35976506	0.00395475
H. camelopardalis	Chr2	0	1999999	0.00414797
H. camelopardalis	Chr2	2000000	3999999	0.00390088
H. camelopardalis	Chr2	4000000	5999999	0.00384027
H. camelopardalis	Chr2	6000000	7999999	0.0041713
H. camelopardalis	Chr2	8000000	9999999	0.00448587
H. camelopardalis	Chr2	10000000	11999999	0.00438415
H. camelopardalis	Chr2	12000000	13999999	0.0056429
H. camelopardalis	Chr2	14000000	15999999	0.00427149
H. camelopardalis	Chr2	16000000	17999999	0.00383807
H. camelopardalis	Chr2	18000000	19999999	0.00366486
H. camelopardalis	Chr2	20000000	21999999	0.00412409
H. camelopardalis	Chr2	22000000	23999999	0.00464492
H. camelopardalis	Chr2	24000000	25999999	0.00534296
H. camelopardalis	Chr2	26000000	27999999	0.00598616
H. camelopardalis	Chr2	28000000	29999999	0.00564982
H. camelopardalis	Chr2	30000000	31999999	0.0047234
H. camelopardalis	Chr2	32000000	32585208	0.00680195
H. camelopardalis	Chr3	0	1999999	0.00733421
H. camelopardalis	Chr3	2000000	3999999	0.00407092
H. camelopardalis	Chr3	4000000	5999999	0.00407886
H. camelopardalis	Chr3	6000000	7999999	0.00439442
H. camelopardalis	Chr3	8000000	9999999	0.00379819
H. camelopardalis	Chr3	10000000	11999999	0.00410251
H. camelopardalis	Chr3	12000000	13999999	0.00422507
H. camelopardalis	Chr3	14000000	15999999	0.00402691
H. camelopardalis	Chr3	16000000	17999999	0.00381093
H. camelopardalis	Chr3	18000000	19999999	0.00373544
H. camelopardalis	Chr3	20000000	21999999	0.00399699
H. camelopardalis	Chr3	22000000	22949005	0.00397047
H. camelopardalis	Chr4	0	1999999	0.00342179
H. camelopardalis	Chr4	2000000	3999999	0.00374702
H. camelopardalis	Chr4	4000000	5999999	0.00346336
H. camelopardalis	Chr4	6000000	7999999	0.00359836
H. camelopardalis	Chr4	8000000	9999999	0.00376124
H. camelopardalis	Chr4	10000000	11999999	0.00388377
H. camelopardalis	Chr4	12000000	13999999	0.00400714
H. camelopardalis	Chr4	14000000	15999999	0.00456023
H. camelopardalis	Chr4	16000000	17999999	0.00462753
H. camelopardalis	Chr4	18000000	19999999	0.00542985
H. camelopardalis	Chr4	20000000	21418693	0.0072967
H. camelopardalis	Chr5	0	1999999	0.00502499
H. camelopardalis	Chr5	2000000	3999999	0.00452386
H. camelopardalis	Chr5	4000000	5999999	0.00394817
H. camelopardalis	Chr5	6000000	7999999	0.0039484
H. camelopardalis	Chr5	8000000	9999999	0.00363919
H. camelopardalis	Chr5	10000000	11999999	0.00391937
H. camelopardalis	Chr5	12000000	13999999	0.00415796
H. camelopardalis	Chr5	14000000	15999999	0.00411669
H. camelopardalis	Chr5	16000000	17999999	0.00433241
H. camelopardalis	Chr5	18000000	19988562	0.00902696
H. camelopardalis	Chr6	0	1999999	0.00381568
H. camelopardalis	Chr6	2000000	3999999	0.00477104
H. camelopardalis	Chr6	4000000	5999999	0.0038862
H. camelopardalis	Chr6	6000000	7999999	0.00374908
H. camelopardalis	Chr6	8000000	9999999	0.00378122
H. camelopardalis	Chr6	10000000	11999999	0.00498481
H. camelopardalis	Chr6	12000000	13999999	0.00501403
H. camelopardalis	Chr6	14000000	15999999	0.0038511
H. camelopardalis	Chr6	16000000	17999999	0.0042103
H. camelopardalis	Chr6	18000000	19999999	0.00411545
H. camelopardalis	Chr6	20000000	21626043	0.00488874
H. camelopardalis	Chr7	0	1999999	0.00331944
H. camelopardalis	Chr7	2000000	3999999	0.00327278
H. camelopardalis	Chr7	4000000	5999999	0.00460619
H. camelopardalis	Chr7	6000000	7999999	0.0036305
H. camelopardalis	Chr7	8000000	9999999	0.00368237
H. camelopardalis	Chr7	10000000	11999999	0.00367175
H. camelopardalis	Chr7	12000000	13999999	0.00343764
H. camelopardalis	Chr7	14000000	15999999	0.00318837
H. camelopardalis	Chr7	16000000	17999999	0.00304567
H. camelopardalis	Chr7	18000000	18009646	0.00304567
H. camelopardalis	Chr8	0	1999999	0.00399295
H. camelopardalis	Chr8	2000000	3999999	0.00418487
H. camelopardalis	Chr8	4000000	5999999	0.00380011
H. camelopardalis	Chr8	6000000	7999999	0.0031199
H. camelopardalis	Chr8	8000000	9999999	0.00337245
H. camelopardalis	Chr8	10000000	11999999	0.00559203
H. camelopardalis	Chr8	12000000	13889474	0.0108879
H. camelopardalis	Chr9	0	1999999	0.00852806
H. camelopardalis	Chr9	2000000	3999999	0.0047437
H. camelopardalis	Chr9	4000000	5999999	0.0040178
H. camelopardalis	Chr9	6000000	7999999	0.00380301
H. camelopardalis	Chr9	8000000	9999999	0.00366405
H. camelopardalis	Chr9	10000000	11999999	0.00358553
H. camelopardalis	Chr9	12000000	13465307	0.00347975
H. camelopardalis	Chr10	0	1999999	0.00379755
H. camelopardalis	Chr10	2000000	3999999	0.00398019
H. camelopardalis	Chr10	4000000	5999999	0.00392986
H. camelopardalis	Chr10	6000000	7999999	0.00380633
H. camelopardalis	Chr10	8000000	9999999	0.00475347
H. camelopardalis	Chr10	10000000	11328791	0.00488436
H. camelopardalis	Chr11	0	1999999	0.00425438
H. camelopardalis	Chr11	2000000	3999999	0.00416569
H. camelopardalis	Chr11	4000000	5999999	0.00396806
H. camelopardalis	Chr11	6000000	7194405	0.00294787
H. camelopardalis	Chr12	0	1999999	0.00481633
H. camelopardalis	Chr12	2000000	3999999	0.00433531
H. camelopardalis	Chr12	4000000	5999999	0.00353527
H. camelopardalis	Chr12	6000000	7999999	0.00356579
H. camelopardalis	Chr12	8000000	9999999	0.00369734
H. camelopardalis	Chr12	10000000	10853637	0.00372676
H. camelopardalis	Chr13	0	1999999	0.00638169
H. camelopardalis	Chr13	2000000	3999999	0.00484854
H. camelopardalis	Chr13	4000000	5999999	0.00335554
H. camelopardalis	Chr13	6000000	7999999	0.00376104
H. camelopardalis	Chr13	8000000	9999999	0.00367718
H. camelopardalis	Chr13	10000000	11999999	0.00416128
H. camelopardalis	Chr13	12000000	13999999	0.00409391
H. camelopardalis	Chr13	14000000	15198843	0.0047323
H. camelopardalis	Chr14	0	1999999	0.00415253
H. camelopardalis	Chr14	2000000	3999999	0.00418502
H. camelopardalis	Chr14	4000000	5999999	0.0041928
H. camelopardalis	Chr14	6000000	7999999	0.00407043
H. camelopardalis	Chr14	8000000	9999999	0.00374882
H. camelopardalis	Chr14	10000000	11999999	0.00378649
H. camelopardalis	Chr14	12000000	13999999	0.00372783
H. camelopardalis	Chr14	14000000	15999999	0.00431009
H. camelopardalis	Chr14	16000000	16583198	0.00428445
H. camelopardalis	Chr15	0	1999999	0.00431566
H. camelopardalis	Chr15	2000000	3999999	0.00366656
H. camelopardalis	Chr15	4000000	5999999	0.00361496
H. camelopardalis	Chr15	6000000	7999999	0.00329046
H. camelopardalis	Chr15	8000000	9999999	0.00496129
H. camelopardalis	Chr15	10000000	10338647	0.00433378
H. camelopardalis	Chr16	0	1999999	0.00402149
H. camelopardalis	Chr16	2000000	3999999	0.00396314
H. camelopardalis	Chr16	4000000	5999999	0.00351379
H. camelopardalis	Chr16	6000000	7999999	0.00355289
H. camelopardalis	Chr16	8000000	9999999	0.00342331
H. camelopardalis	Chr16	10000000	11999999	0.00390167
H. camelopardalis	Chr16	12000000	13999999	0.0056053
H. camelopardalis	Chr16	14000000	14659096	0.0077047
H. camelopardalis	Chr17	0	1999999	0.0042213
H. camelopardalis	Chr17	2000000	3999999	0.00381545
H. camelopardalis	Chr17	4000000	5999999	0.0034679
H. camelopardalis	Chr17	6000000	7999999	0.00319412
H. camelopardalis	Chr17	8000000	9999999	0.00372707
H. camelopardalis	Chr17	10000000	11999999	0.00356914
H. camelopardalis	Chr17	12000000	13999999	0.00357106
H. camelopardalis	Chr17	14000000	15999999	0.00351258
H. camelopardalis	Chr17	16000000	17999999	0.00368876
H. camelopardalis	Chr17	18000000	19999999	0.00376541
H. camelopardalis	Chr17	20000000	21999999	0.00465553
H. camelopardalis	Chr17	22000000	23001425	0.00780601
H. camelopardalis	Chr18	0	1999999	0.00447637
H. camelopardalis	Chr18	2000000	3999999	0.00416959
H. camelopardalis	Chr18	4000000	5999999	0.00395926
H. camelopardalis	Chr18	6000000	7999999	0.00397345
H. camelopardalis	Chr18	8000000	9999999	0.00428169
H. camelopardalis	Chr18	10000000	11999999	0.00386948
H. camelopardalis	Chr18	12000000	13999999	0.0040555
H. camelopardalis	Chr18	14000000	15999999	0.00379677
H. camelopardalis	Chr18	16000000	17999999	0.00410924
H. camelopardalis	Chr18	18000000	19999999	0.00594571
H. camelopardalis	Chr18	20000000	20726299	0.00926222
H. camelopardalis	Chr19	0	1999999	0.00647628
H. camelopardalis	Chr19	2000000	3999999	0.00505251
H. camelopardalis	Chr19	4000000	5999999	0.00439332
H. camelopardalis	Chr19	6000000	7999999	0.00361417
H. camelopardalis	Chr19	8000000	9999999	0.0036614
H. camelopardalis	Chr19	10000000	11999999	0.003457
H. camelopardalis	Chr19	12000000	13999999	0.00387135
H. camelopardalis	Chr19	14000000	15999999	0.00400831
H. camelopardalis	Chr19	16000000	17999999	0.00377635
H. camelopardalis	Chr19	18000000	19999999	0.00404738
H. camelopardalis	Chr19	20000000	20521517	0.00374881
H. camelopardalis	Chr20	0	1999999	0.00332616
H. camelopardalis	Chr20	2000000	3999999	0.0035228
H. camelopardalis	Chr20	4000000	5999999	0.00374678
H. camelopardalis	Chr20	6000000	7999999	0.00411705
H. camelopardalis	Chr20	8000000	9999999	0.00404221
H. camelopardalis	Chr20	10000000	11999999	0.00372319
H. camelopardalis	Chr20	12000000	13999999	0.00402479
H. camelopardalis	Chr20	14000000	15999999	0.00469405
H. camelopardalis	Chr20	16000000	17999999	0.00559544
H. camelopardalis	Chr20	18000000	19096086	0.00850384
H. camelopardalis	Chr21	0	1999999	0.00556455
H. camelopardalis	Chr21	2000000	3999999	0.00376719
H. camelopardalis	Chr21	4000000	5999999	0.0035996
H. camelopardalis	Chr21	6000000	7999999	0.00372685
H. camelopardalis	Chr21	8000000	9999999	0.00523261
H. camelopardalis	Chr21	10000000	11999999	0.0044183
H. camelopardalis	Chr21	12000000	13999999	0.00413361
H. camelopardalis	Chr21	14000000	15999999	0.00412101
H. camelopardalis	Chr21	16000000	17999999	0.00432674
H. camelopardalis	Chr21	18000000	19999999	0.00400624
H. camelopardalis	Chr21	20000000	21999999	0.00387995
H. camelopardalis	Chr21	22000000	23999999	0.00387239
H. camelopardalis	Chr21	24000000	25999999	0.00388061
H. camelopardalis	Chr21	26000000	26406474	0.00379543
H. camelopardalis	Chr22	0	1999999	0.0040821
H. camelopardalis	Chr22	2000000	3999999	0.00430689
H. camelopardalis	Chr22	4000000	5999999	0.00366063
H. camelopardalis	Chr22	6000000	7999999	0.00406831
H. camelopardalis	Chr22	8000000	9999999	0.00411106
H. camelopardalis	Chr22	10000000	11999999	0.00383955
H. camelopardalis	Chr22	12000000	13999999	0.00332725
H. camelopardalis	Chr22	14000000	15999999	0.00382541
H. camelopardalis	Chr22	16000000	17999999	0.00575703
H. camelopardalis	Chr22	18000000	19999999	0.00470446
H. camelopardalis	Chr22	20000000	21999999	0.004277
H. camelopardalis	Chr22	22000000	23999999	0.00387224
H. camelopardalis	Chr22	24000000	24399998	0.0035402
H. comes	Chr1	0	1999999	0.00836543
H. comes	Chr1	2000000	3999999	0.00701153
H. comes	Chr1	4000000	5999999	0.00669477
H. comes	Chr1	6000000	7999999	0.00691793
H. comes	Chr1	8000000	9999999	0.00727843
H. comes	Chr1	10000000	11999999	0.00712562
H. comes	Chr1	12000000	13999999	0.00673323
H. comes	Chr1	14000000	15999999	0.0059077
H. comes	Chr1	16000000	17999999	0.00597426
H. comes	Chr1	18000000	19999999	0.0049224
H. comes	Chr1	20000000	21999999	0.00538445
H. comes	Chr1	22000000	23999999	0.0061583
H. comes	Chr1	24000000	25999999	0.00504795
H. comes	Chr1	26000000	27999999	0.00537405
H. comes	Chr1	28000000	29999999	0.00541191
H. comes	Chr1	30000000	31999999	0.00557575
H. comes	Chr1	32000000	33999999	0.00679622
H. comes	Chr1	34000000	35976506	0.0091617
H. comes	Chr2	0	1999999	0.00594884
H. comes	Chr2	2000000	3999999	0.00760826
H. comes	Chr2	4000000	5999999	0.00716247
H. comes	Chr2	6000000	7999999	0.00718962
H. comes	Chr2	8000000	9999999	0.00802706
H. comes	Chr2	10000000	11999999	0.00680537
H. comes	Chr2	12000000	13999999	0.00735746
H. comes	Chr2	14000000	15999999	0.00625432
H. comes	Chr2	16000000	17999999	0.00603192
H. comes	Chr2	18000000	19999999	0.00544456
H. comes	Chr2	20000000	21999999	0.00622437
H. comes	Chr2	22000000	23999999	0.0065405
H. comes	Chr2	24000000	25999999	0.0074135
H. comes	Chr2	26000000	27999999	0.0081137
H. comes	Chr2	28000000	29999999	0.00781243
H. comes	Chr2	30000000	31999999	0.00646961
H. comes	Chr2	32000000	32585208	0.0074371
H. comes	Chr3	0	1999999	0.00872179
H. comes	Chr3	2000000	3999999	0.00746152
H. comes	Chr3	4000000	5999999	0.00631353
H. comes	Chr3	6000000	7999999	0.00634206
H. comes	Chr3	8000000	9999999	0.00566493
H. comes	Chr3	10000000	11999999	0.00666119
H. comes	Chr3	12000000	13999999	0.00721492
H. comes	Chr3	14000000	15999999	0.00664011
H. comes	Chr3	16000000	17999999	0.00608126
H. comes	Chr3	18000000	19999999	0.0056119
H. comes	Chr3	20000000	21999999	0.00593493
H. comes	Chr3	22000000	22949005	0.00581708
H. comes	Chr4	0	1999999	0.0067012
H. comes	Chr4	2000000	3999999	0.00776721
H. comes	Chr4	4000000	5999999	0.00682889
H. comes	Chr4	6000000	7999999	0.00647971
H. comes	Chr4	8000000	9999999	0.00655711
H. comes	Chr4	10000000	11999999	0.00614681
H. comes	Chr4	12000000	13999999	0.00676965
H. comes	Chr4	14000000	15999999	0.00648136
H. comes	Chr4	16000000	17999999	0.006856
H. comes	Chr4	18000000	19999999	0.00774554
H. comes	Chr4	20000000	21418693	0.00901997
H. comes	Chr5	0	1999999	0.00718726
H. comes	Chr5	2000000	3999999	0.00702094
H. comes	Chr5	4000000	5999999	0.00807936
H. comes	Chr5	6000000	7999999	0.00736552
H. comes	Chr5	8000000	9999999	0.00648328
H. comes	Chr5	10000000	11999999	0.00678471
H. comes	Chr5	12000000	13999999	0.00718574
H. comes	Chr5	14000000	15999999	0.00695218
H. comes	Chr5	16000000	17999999	0.00658257
H. comes	Chr5	18000000	19988562	0.00908774
H. comes	Chr6	0	1999999	0.00530436
H. comes	Chr6	2000000	3999999	0.00636753
H. comes	Chr6	4000000	5999999	0.00566283
H. comes	Chr6	6000000	7999999	0.00570374
H. comes	Chr6	8000000	9999999	0.00557196
H. comes	Chr6	10000000	11999999	0.00773486
H. comes	Chr6	12000000	13999999	0.00799478
H. comes	Chr6	14000000	15999999	0.00545558
H. comes	Chr6	16000000	17999999	0.00641645
H. comes	Chr6	18000000	19999999	0.00622972
H. comes	Chr6	20000000	21626043	0.00682857
H. comes	Chr7	0	1999999	0.00714468
H. comes	Chr7	2000000	3999999	0.00634851
H. comes	Chr7	4000000	5999999	0.00775585
H. comes	Chr7	6000000	7999999	0.00807378
H. comes	Chr7	8000000	9999999	0.00843642
H. comes	Chr7	10000000	11999999	0.00776797
H. comes	Chr7	12000000	13999999	0.00734613
H. comes	Chr7	14000000	15999999	0.00647968
H. comes	Chr7	16000000	17999999	0.00602682
H. comes	Chr7	18000000	18009646	0.00602682
H. comes	Chr8	0	1999999	0.00701835
H. comes	Chr8	2000000	3999999	0.00832361
H. comes	Chr8	4000000	5999999	0.00755702
H. comes	Chr8	6000000	7999999	0.00608976
H. comes	Chr8	8000000	9999999	0.00626785
H. comes	Chr8	10000000	11999999	0.00945408
H. comes	Chr8	12000000	13889474	0.0113922
H. comes	Chr9	0	1999999	0.0106399
H. comes	Chr9	2000000	3999999	0.00761566
H. comes	Chr9	4000000	5999999	0.00739103
H. comes	Chr9	6000000	7999999	0.00712204
H. comes	Chr9	8000000	9999999	0.00712661
H. comes	Chr9	10000000	11999999	0.00700885
H. comes	Chr9	12000000	13465307	0.00707205
H. comes	Chr10	0	1999999	0.00688095
H. comes	Chr10	2000000	3999999	0.0071876
H. comes	Chr10	4000000	5999999	0.00770461
H. comes	Chr10	6000000	7999999	0.00743829
H. comes	Chr10	8000000	9999999	0.00880724
H. comes	Chr10	10000000	11328791	0.00855159
H. comes	Chr11	0	1999999	0.00760466
H. comes	Chr11	2000000	3999999	0.00720104
H. comes	Chr11	4000000	5999999	0.00756452
H. comes	Chr11	6000000	7194405	0.00661577
H. comes	Chr12	0	1999999	0.00877022
H. comes	Chr12	2000000	3999999	0.00789847
H. comes	Chr12	4000000	5999999	0.00678734
H. comes	Chr12	6000000	7999999	0.00614439
H. comes	Chr12	8000000	9999999	0.00643677
H. comes	Chr12	10000000	10853637	0.00702507
H. comes	Chr13	0	1999999	0.00834398
H. comes	Chr13	2000000	3999999	0.0081357
H. comes	Chr13	4000000	5999999	0.00704941
H. comes	Chr13	6000000	7999999	0.00718885
H. comes	Chr13	8000000	9999999	0.00692698
H. comes	Chr13	10000000	11999999	0.00700863
H. comes	Chr13	12000000	13999999	0.00687245
H. comes	Chr13	14000000	15198843	0.00764552
H. comes	Chr14	0	1999999	0.0068878
H. comes	Chr14	2000000	3999999	0.00697204
H. comes	Chr14	4000000	5999999	0.00695512
H. comes	Chr14	6000000	7999999	0.00713779
H. comes	Chr14	8000000	9999999	0.00690683
H. comes	Chr14	10000000	11999999	0.00714593
H. comes	Chr14	12000000	13999999	0.00695003
H. comes	Chr14	14000000	15999999	0.00779067
H. comes	Chr14	16000000	16583198	0.00719065
H. comes	Chr15	0	1999999	0.00804541
H. comes	Chr15	2000000	3999999	0.00678649
H. comes	Chr15	4000000	5999999	0.0063651
H. comes	Chr15	6000000	7999999	0.00617095
H. comes	Chr15	8000000	9999999	0.00883857
H. comes	Chr15	10000000	10338647	0.00848962
H. comes	Chr16	0	1999999	0.0071477
H. comes	Chr16	2000000	3999999	0.00707498
H. comes	Chr16	4000000	5999999	0.00619979
H. comes	Chr16	6000000	7999999	0.00618744
H. comes	Chr16	8000000	9999999	0.0058477
H. comes	Chr16	10000000	11999999	0.00636785
H. comes	Chr16	12000000	13999999	0.00829419
H. comes	Chr16	14000000	14659096	0.00969835
H. comes	Chr17	0	1999999	0.00677119
H. comes	Chr17	2000000	3999999	0.00556006
H. comes	Chr17	4000000	5999999	0.00559343
H. comes	Chr17	6000000	7999999	0.00552585
H. comes	Chr17	8000000	9999999	0.00639786
H. comes	Chr17	10000000	11999999	0.00684979
H. comes	Chr17	12000000	13999999	0.00653635
H. comes	Chr17	14000000	15999999	0.00678666
H. comes	Chr17	16000000	17999999	0.00741549
H. comes	Chr17	18000000	19999999	0.00846532
H. comes	Chr17	20000000	21999999	0.00741032
H. comes	Chr17	22000000	23001425	0.00934996
H. comes	Chr18	0	1999999	0.0070074
H. comes	Chr18	2000000	3999999	0.00793291
H. comes	Chr18	4000000	5999999	0.00803104
H. comes	Chr18	6000000	7999999	0.00770228
H. comes	Chr18	8000000	9999999	0.00790583
H. comes	Chr18	10000000	11999999	0.00669379
H. comes	Chr18	12000000	13999999	0.00665535
H. comes	Chr18	14000000	15999999	0.00613307
H. comes	Chr18	16000000	17999999	0.00619297
H. comes	Chr18	18000000	19999999	0.00814813
H. comes	Chr18	20000000	20726299	0.0103042
H. comes	Chr19	0	1999999	0.00805567
H. comes	Chr19	2000000	3999999	0.00717956
H. comes	Chr19	4000000	5999999	0.00647073
H. comes	Chr19	6000000	7999999	0.0051834
H. comes	Chr19	8000000	9999999	0.00519048
H. comes	Chr19	10000000	11999999	0.00576388
H. comes	Chr19	12000000	13999999	0.00679526
H. comes	Chr19	14000000	15999999	0.00767904
H. comes	Chr19	16000000	17999999	0.00722132
H. comes	Chr19	18000000	19999999	0.0078136
H. comes	Chr19	20000000	20521517	0.00809073
H. comes	Chr20	0	1999999	0.00776819
H. comes	Chr20	2000000	3999999	0.00716833
H. comes	Chr20	4000000	5999999	0.00681412
H. comes	Chr20	6000000	7999999	0.00682883
H. comes	Chr20	8000000	9999999	0.0066437
H. comes	Chr20	10000000	11999999	0.00629952
H. comes	Chr20	12000000	13999999	0.00634184
H. comes	Chr20	14000000	15999999	0.00699462
H. comes	Chr20	16000000	17999999	0.00816512
H. comes	Chr20	18000000	19096086	0.00915806
H. comes	Chr21	0	1999999	0.00802114
H. comes	Chr21	2000000	3999999	0.00580828
H. comes	Chr21	4000000	5999999	0.00494656
H. comes	Chr21	6000000	7999999	0.00533873
H. comes	Chr21	8000000	9999999	0.00730202
H. comes	Chr21	10000000	11999999	0.00621531
H. comes	Chr21	12000000	13999999	0.00590888
H. comes	Chr21	14000000	15999999	0.0063026
H. comes	Chr21	16000000	17999999	0.00766057
H. comes	Chr21	18000000	19999999	0.00637044
H. comes	Chr21	20000000	21999999	0.00645136
H. comes	Chr21	22000000	23999999	0.00593917
H. comes	Chr21	24000000	25999999	0.00592634
H. comes	Chr21	26000000	26406474	0.00555492
H. comes	Chr22	0	1999999	0.00788318
H. comes	Chr22	2000000	3999999	0.00648906
H. comes	Chr22	4000000	5999999	0.00642808
H. comes	Chr22	6000000	7999999	0.00631838
H. comes	Chr22	8000000	9999999	0.00686887
H. comes	Chr22	10000000	11999999	0.00646524
H. comes	Chr22	12000000	13999999	0.00576522
H. comes	Chr22	14000000	15999999	0.00599226
H. comes	Chr22	16000000	17999999	0.00840678
H. comes	Chr22	18000000	19999999	0.008249
H. comes	Chr22	20000000	21999999	0.00782571
H. comes	Chr22	22000000	23999999	0.0073881
H. comes	Chr22	24000000	24399998	0.00652859
H. capensis	Chr1	0	1999999	0.00523023
H. capensis	Chr1	2000000	3999999	0.00517189
H. capensis	Chr1	4000000	5999999	0.00589897
H. capensis	Chr1	6000000	7999999	0.00648377
H. capensis	Chr1	8000000	9999999	0.00661995
H. capensis	Chr1	10000000	11999999	0.00574909
H. capensis	Chr1	12000000	13999999	0.00477549
H. capensis	Chr1	14000000	15999999	0.00450729
H. capensis	Chr1	16000000	17999999	0.00442085
H. capensis	Chr1	18000000	19999999	0.00363208
H. capensis	Chr1	20000000	21999999	0.00408893
H. capensis	Chr1	22000000	23999999	0.00432347
H. capensis	Chr1	24000000	25999999	0.00380606
H. capensis	Chr1	26000000	27999999	0.00357738
H. capensis	Chr1	28000000	29999999	0.00372142
H. capensis	Chr1	30000000	31999999	0.00365241
H. capensis	Chr1	32000000	33999999	0.00491975
H. capensis	Chr1	34000000	35976506	0.00596685
H. capensis	Chr2	0	1999999	0.00408684
H. capensis	Chr2	2000000	3999999	0.0057504
H. capensis	Chr2	4000000	5999999	0.00649062
H. capensis	Chr2	6000000	7999999	0.00638949
H. capensis	Chr2	8000000	9999999	0.0059244
H. capensis	Chr2	10000000	11999999	0.00490745
H. capensis	Chr2	12000000	13999999	0.00562674
H. capensis	Chr2	14000000	15999999	0.00437711
H. capensis	Chr2	16000000	17999999	0.00442543
H. capensis	Chr2	18000000	19999999	0.00426981
H. capensis	Chr2	20000000	21999999	0.00486786
H. capensis	Chr2	22000000	23999999	0.00476406
H. capensis	Chr2	24000000	25999999	0.00477599
H. capensis	Chr2	26000000	27999999	0.00529923
H. capensis	Chr2	28000000	29999999	0.00540822
H. capensis	Chr2	30000000	31999999	0.00533931
H. capensis	Chr2	32000000	32585208	0.00609414
H. capensis	Chr3	0	1999999	0.00612403
H. capensis	Chr3	2000000	3999999	0.00547592
H. capensis	Chr3	4000000	5999999	0.00479938
H. capensis	Chr3	6000000	7999999	0.00532031
H. capensis	Chr3	8000000	9999999	0.00627607
H. capensis	Chr3	10000000	11999999	0.00648303
H. capensis	Chr3	12000000	13999999	0.00641332
H. capensis	Chr3	14000000	15999999	0.00571291
H. capensis	Chr3	16000000	17999999	0.00516559
H. capensis	Chr3	18000000	19999999	0.00431821
H. capensis	Chr3	20000000	21999999	0.00431556
H. capensis	Chr3	22000000	22949005	0.00436313
H. capensis	Chr4	0	1999999	0.00640295
H. capensis	Chr4	2000000	3999999	0.00661452
H. capensis	Chr4	4000000	5999999	0.00584548
H. capensis	Chr4	6000000	7999999	0.0053879
H. capensis	Chr4	8000000	9999999	0.00480765
H. capensis	Chr4	10000000	11999999	0.00438633
H. capensis	Chr4	12000000	13999999	0.00463026
H. capensis	Chr4	14000000	15999999	0.00457299
H. capensis	Chr4	16000000	17999999	0.00479208
H. capensis	Chr4	18000000	19999999	0.00523109
H. capensis	Chr4	20000000	21418693	0.00597569
H. capensis	Chr5	0	1999999	0.00525763
H. capensis	Chr5	2000000	3999999	0.0053634
H. capensis	Chr5	4000000	5999999	0.00707463
H. capensis	Chr5	6000000	7999999	0.00660813
H. capensis	Chr5	8000000	9999999	0.00562246
H. capensis	Chr5	10000000	11999999	0.00524551
H. capensis	Chr5	12000000	13999999	0.00525949
H. capensis	Chr5	14000000	15999999	0.00476777
H. capensis	Chr5	16000000	17999999	0.00517485
H. capensis	Chr5	18000000	19988562	0.00599514
H. capensis	Chr6	0	1999999	0.00411866
H. capensis	Chr6	2000000	3999999	0.00518566
H. capensis	Chr6	4000000	5999999	0.00423302
H. capensis	Chr6	6000000	7999999	0.00436375
H. capensis	Chr6	8000000	9999999	0.00469834
H. capensis	Chr6	10000000	11999999	0.00552012
H. capensis	Chr6	12000000	13999999	0.00472339
H. capensis	Chr6	14000000	15999999	0.00460146
H. capensis	Chr6	16000000	17999999	0.00578064
H. capensis	Chr6	18000000	19999999	0.00534679
H. capensis	Chr6	20000000	21626043	0.0041118
H. capensis	Chr7	0	1999999	0.00467198
H. capensis	Chr7	2000000	3999999	0.00502109
H. capensis	Chr7	4000000	5999999	0.00460074
H. capensis	Chr7	6000000	7999999	0.00618656
H. capensis	Chr7	8000000	9999999	0.006644
H. capensis	Chr7	10000000	11999999	0.00606768
H. capensis	Chr7	12000000	13999999	0.00571344
H. capensis	Chr7	14000000	15999999	0.00516209
H. capensis	Chr7	16000000	17999999	0.00469538
H. capensis	Chr7	18000000	18009646	0.00469538
H. capensis	Chr8	0	1999999	0.00653959
H. capensis	Chr8	2000000	3999999	0.00623121
H. capensis	Chr8	4000000	5999999	0.00548318
H. capensis	Chr8	6000000	7999999	0.00577038
H. capensis	Chr8	8000000	9999999	0.00551564
H. capensis	Chr8	10000000	11999999	0.00625428
H. capensis	Chr8	12000000	13889474	0.0092653
H. capensis	Chr9	0	1999999	0.00811983
H. capensis	Chr9	2000000	3999999	0.00737501
H. capensis	Chr9	4000000	5999999	0.00646537
H. capensis	Chr9	6000000	7999999	0.00592662
H. capensis	Chr9	8000000	9999999	0.00586046
H. capensis	Chr9	10000000	11999999	0.00584742
H. capensis	Chr9	12000000	13465307	0.00503361
H. capensis	Chr10	0	1999999	0.00561308
H. capensis	Chr10	2000000	3999999	0.00531473
H. capensis	Chr10	4000000	5999999	0.00532715
H. capensis	Chr10	6000000	7999999	0.00565438
H. capensis	Chr10	8000000	9999999	0.00677856
H. capensis	Chr10	10000000	11328791	0.00727453
H. capensis	Chr11	0	1999999	0.00626008
H. capensis	Chr11	2000000	3999999	0.00605801
H. capensis	Chr11	4000000	5999999	0.00604766
H. capensis	Chr11	6000000	7194405	0.00493881
H. capensis	Chr12	0	1999999	0.00581362
H. capensis	Chr12	2000000	3999999	0.00587837
H. capensis	Chr12	4000000	5999999	0.00552548
H. capensis	Chr12	6000000	7999999	0.00545089
H. capensis	Chr12	8000000	9999999	0.00524637
H. capensis	Chr12	10000000	10853637	0.00616728
H. capensis	Chr13	0	1999999	0.00541903
H. capensis	Chr13	2000000	3999999	0.00539048
H. capensis	Chr13	4000000	5999999	0.00549039
H. capensis	Chr13	6000000	7999999	0.00585077
H. capensis	Chr13	8000000	9999999	0.00584366
H. capensis	Chr13	10000000	11999999	0.0064152
H. capensis	Chr13	12000000	13999999	0.0054544
H. capensis	Chr13	14000000	15198843	0.0059325
H. capensis	Chr14	0	1999999	0.00511542
H. capensis	Chr14	2000000	3999999	0.00470474
H. capensis	Chr14	4000000	5999999	0.00564778
H. capensis	Chr14	6000000	7999999	0.00626796
H. capensis	Chr14	8000000	9999999	0.00592118
H. capensis	Chr14	10000000	11999999	0.00603194
H. capensis	Chr14	12000000	13999999	0.00601293
H. capensis	Chr14	14000000	15999999	0.00433773
H. capensis	Chr14	16000000	16583198	0.00421534
H. capensis	Chr15	0	1999999	0.00656123
H. capensis	Chr15	2000000	3999999	0.00542947
H. capensis	Chr15	4000000	5999999	0.00519879
H. capensis	Chr15	6000000	7999999	0.00473276
H. capensis	Chr15	8000000	9999999	0.00573192
H. capensis	Chr15	10000000	10338647	0.00539516
H. capensis	Chr16	0	1999999	0.00581457
H. capensis	Chr16	2000000	3999999	0.00627292
H. capensis	Chr16	4000000	5999999	0.00549086
H. capensis	Chr16	6000000	7999999	0.00494682
H. capensis	Chr16	8000000	9999999	0.00500859
H. capensis	Chr16	10000000	11999999	0.00505034
H. capensis	Chr16	12000000	13999999	0.00551511
H. capensis	Chr16	14000000	14659096	0.00595283
H. capensis	Chr17	0	1999999	0.00441901
H. capensis	Chr17	2000000	3999999	0.00390556
H. capensis	Chr17	4000000	5999999	0.00390735
H. capensis	Chr17	6000000	7999999	0.00430834
H. capensis	Chr17	8000000	9999999	0.00503252
H. capensis	Chr17	10000000	11999999	0.00547758
H. capensis	Chr17	12000000	13999999	0.00536918
H. capensis	Chr17	14000000	15999999	0.00604908
H. capensis	Chr17	16000000	17999999	0.00657344
H. capensis	Chr17	18000000	19999999	0.00633659
H. capensis	Chr17	20000000	21999999	0.00451807
H. capensis	Chr17	22000000	23001425	0.00577855
H. capensis	Chr18	0	1999999	0.00531875
H. capensis	Chr18	2000000	3999999	0.00579204
H. capensis	Chr18	4000000	5999999	0.00639846
H. capensis	Chr18	6000000	7999999	0.00585423
H. capensis	Chr18	8000000	9999999	0.00612555
H. capensis	Chr18	10000000	11999999	0.00531295
H. capensis	Chr18	12000000	13999999	0.00537375
H. capensis	Chr18	14000000	15999999	0.00463126
H. capensis	Chr18	16000000	17999999	0.00461684
H. capensis	Chr18	18000000	19999999	0.00505866
H. capensis	Chr18	20000000	20726299	0.00747091
H. capensis	Chr19	0	1999999	0.00533058
H. capensis	Chr19	2000000	3999999	0.00475092
H. capensis	Chr19	4000000	5999999	0.00454913
H. capensis	Chr19	6000000	7999999	0.00395583
H. capensis	Chr19	8000000	9999999	0.00398168
H. capensis	Chr19	10000000	11999999	0.00434506
H. capensis	Chr19	12000000	13999999	0.00582172
H. capensis	Chr19	14000000	15999999	0.00649786
H. capensis	Chr19	16000000	17999999	0.00614796
H. capensis	Chr19	18000000	19999999	0.00761506
H. capensis	Chr19	20000000	20521517	0.00617988
H. capensis	Chr20	0	1999999	0.00559224
H. capensis	Chr20	2000000	3999999	0.00571161
H. capensis	Chr20	4000000	5999999	0.00607795
H. capensis	Chr20	6000000	7999999	0.00534691
H. capensis	Chr20	8000000	9999999	0.00528017
H. capensis	Chr20	10000000	11999999	0.00514951
H. capensis	Chr20	12000000	13999999	0.00513971
H. capensis	Chr20	14000000	15999999	0.00464219
H. capensis	Chr20	16000000	17999999	0.0051856
H. capensis	Chr20	18000000	19096086	0.0059203
H. capensis	Chr21	0	1999999	0.0051924
H. capensis	Chr21	2000000	3999999	0.00494187
H. capensis	Chr21	4000000	5999999	0.00372942
H. capensis	Chr21	6000000	7999999	0.00387897
H. capensis	Chr21	8000000	9999999	0.00569621
H. capensis	Chr21	10000000	11999999	0.00419322
H. capensis	Chr21	12000000	13999999	0.00418236
H. capensis	Chr21	14000000	15999999	0.0050164
H. capensis	Chr21	16000000	17999999	0.00699272
H. capensis	Chr21	18000000	19999999	0.00644281
H. capensis	Chr21	20000000	21999999	0.00563283
H. capensis	Chr21	22000000	23999999	0.00536164
H. capensis	Chr21	24000000	25999999	0.00485503
H. capensis	Chr21	26000000	26406474	0.00486305
H. capensis	Chr22	0	1999999	0.00574201
H. capensis	Chr22	2000000	3999999	0.00508865
H. capensis	Chr22	4000000	5999999	0.00487523
H. capensis	Chr22	6000000	7999999	0.00501265
H. capensis	Chr22	8000000	9999999	0.00564519
H. capensis	Chr22	10000000	11999999	0.00440463
H. capensis	Chr22	12000000	13999999	0.00388756
H. capensis	Chr22	14000000	15999999	0.00468169
H. capensis	Chr22	16000000	17999999	0.00665691
H. capensis	Chr22	18000000	19999999	0.00586331
H. capensis	Chr22	20000000	21999999	0.00589287
H. capensis	Chr22	22000000	23999999	0.00600858
H. capensis	Chr22	24000000	24399998	0.00526066
H. erectus	Chr1	0	1999999	0.00916668
H. erectus	Chr1	2000000	3999999	0.00741657
H. erectus	Chr1	4000000	5999999	0.00660467
H. erectus	Chr1	6000000	7999999	0.00699296
H. erectus	Chr1	8000000	9999999	0.00715937
H. erectus	Chr1	10000000	11999999	0.00680206
H. erectus	Chr1	12000000	13999999	0.00796585
H. erectus	Chr1	14000000	15999999	0.00722497
H. erectus	Chr1	16000000	17999999	0.0062222
H. erectus	Chr1	18000000	19999999	0.00548844
H. erectus	Chr1	20000000	21999999	0.00562358
H. erectus	Chr1	22000000	23999999	0.00548451
H. erectus	Chr1	24000000	25999999	0.00486289
H. erectus	Chr1	26000000	27999999	0.00531581
H. erectus	Chr1	28000000	29999999	0.00612923
H. erectus	Chr1	30000000	31999999	0.00784281
H. erectus	Chr1	32000000	33999999	0.00798259
H. erectus	Chr1	34000000	35976506	0.00837952
H. erectus	Chr2	0	1999999	0.0102893
H. erectus	Chr2	2000000	3999999	0.0092297
H. erectus	Chr2	4000000	5999999	0.00772252
H. erectus	Chr2	6000000	7999999	0.00793326
H. erectus	Chr2	8000000	9999999	0.00773294
H. erectus	Chr2	10000000	11999999	0.00880666
H. erectus	Chr2	12000000	13999999	0.00925709
H. erectus	Chr2	14000000	15999999	0.00862025
H. erectus	Chr2	16000000	17999999	0.00813855
H. erectus	Chr2	18000000	19999999	0.00744623
H. erectus	Chr2	20000000	21999999	0.00834948
H. erectus	Chr2	22000000	23999999	0.0078478
H. erectus	Chr2	24000000	25999999	0.00847143
H. erectus	Chr2	26000000	27999999	0.00985426
H. erectus	Chr2	28000000	29999999	0.009842
H. erectus	Chr2	30000000	31999999	0.00734951
H. erectus	Chr2	32000000	32585208	0.00332628
H. erectus	Chr3	0	1999999	0.00957603
H. erectus	Chr3	2000000	3999999	0.00935266
H. erectus	Chr3	4000000	5999999	0.0092045
H. erectus	Chr3	6000000	7999999	0.00948534
H. erectus	Chr3	8000000	9999999	0.00794839
H. erectus	Chr3	10000000	11999999	0.00836767
H. erectus	Chr3	12000000	13999999	0.0092426
H. erectus	Chr3	14000000	15999999	0.00858407
H. erectus	Chr3	16000000	17999999	0.00844042
H. erectus	Chr3	18000000	19999999	0.00841812
H. erectus	Chr3	20000000	21999999	0.010068
H. erectus	Chr3	22000000	22949005	0.0083143
H. erectus	Chr4	0	1999999	0.00902396
H. erectus	Chr4	2000000	3999999	0.00881903
H. erectus	Chr4	4000000	5999999	0.00795337
H. erectus	Chr4	6000000	7999999	0.00771961
H. erectus	Chr4	8000000	9999999	0.00770182
H. erectus	Chr4	10000000	11999999	0.00801592
H. erectus	Chr4	12000000	13999999	0.00877297
H. erectus	Chr4	14000000	15999999	0.00928127
H. erectus	Chr4	16000000	17999999	0.0103304
H. erectus	Chr4	18000000	19999999	0.0110395
H. erectus	Chr4	20000000	21418693	0.00787678
H. erectus	Chr5	0	1999999	0.00984715
H. erectus	Chr5	2000000	3999999	0.00971113
H. erectus	Chr5	4000000	5999999	0.00994829
H. erectus	Chr5	6000000	7999999	0.00897068
H. erectus	Chr5	8000000	9999999	0.00822283
H. erectus	Chr5	10000000	11999999	0.00803449
H. erectus	Chr5	12000000	13999999	0.00873755
H. erectus	Chr5	14000000	15999999	0.00829917
H. erectus	Chr5	16000000	17999999	0.00911338
H. erectus	Chr5	18000000	19988562	0.00862693
H. erectus	Chr6	0	1999999	0.00957553
H. erectus	Chr6	2000000	3999999	0.0100092
H. erectus	Chr6	4000000	5999999	0.00862238
H. erectus	Chr6	6000000	7999999	0.00789083
H. erectus	Chr6	8000000	9999999	0.00797792
H. erectus	Chr6	10000000	11999999	0.00943016
H. erectus	Chr6	12000000	13999999	0.00833377
H. erectus	Chr6	14000000	15999999	0.00871489
H. erectus	Chr6	16000000	17999999	0.00893987
H. erectus	Chr6	18000000	19999999	0.00820352
H. erectus	Chr6	20000000	21626043	0.00776169
H. erectus	Chr7	0	1999999	0.010765
H. erectus	Chr7	2000000	3999999	0.00958792
H. erectus	Chr7	4000000	5999999	0.00991829
H. erectus	Chr7	6000000	7999999	0.00912419
H. erectus	Chr7	8000000	9999999	0.009562
H. erectus	Chr7	10000000	11999999	0.00900656
H. erectus	Chr7	12000000	13999999	0.00911355
H. erectus	Chr7	14000000	15999999	0.00826356
H. erectus	Chr7	16000000	17999999	0.00618242
H. erectus	Chr7	18000000	18009646	0.00618242
H. erectus	Chr8	0	1999999	0.00894216
H. erectus	Chr8	2000000	3999999	0.00939495
H. erectus	Chr8	4000000	5999999	0.00904184
H. erectus	Chr8	6000000	7999999	0.00809069
H. erectus	Chr8	8000000	9999999	0.00809246
H. erectus	Chr8	10000000	11999999	0.00877433
H. erectus	Chr8	12000000	13889474	0.00841834
H. erectus	Chr9	0	1999999	0.0079108
H. erectus	Chr9	2000000	3999999	0.0102379
H. erectus	Chr9	4000000	5999999	0.00978619
H. erectus	Chr9	6000000	7999999	0.00874331
H. erectus	Chr9	8000000	9999999	0.00884969
H. erectus	Chr9	10000000	11999999	0.00913694
H. erectus	Chr9	12000000	13465307	0.00844112
H. erectus	Chr10	0	1999999	0.00799677
H. erectus	Chr10	2000000	3999999	0.00868944
H. erectus	Chr10	4000000	5999999	0.00896177
H. erectus	Chr10	6000000	7999999	0.00909604
H. erectus	Chr10	8000000	9999999	0.00875151
H. erectus	Chr10	10000000	11328791	0.00751568
H. erectus	Chr11	0	1999999	0.00990762
H. erectus	Chr11	2000000	3999999	0.0105826
H. erectus	Chr11	4000000	5999999	0.00945241
H. erectus	Chr11	6000000	7194405	0.00568537
H. erectus	Chr12	0	1999999	0.00867762
H. erectus	Chr12	2000000	3999999	0.00932016
H. erectus	Chr12	4000000	5999999	0.00888328
H. erectus	Chr12	6000000	7999999	0.00924217
H. erectus	Chr12	8000000	9999999	0.00801776
H. erectus	Chr12	10000000	10853637	0.00832748
H. erectus	Chr13	0	1999999	0.00973174
H. erectus	Chr13	2000000	3999999	0.00917876
H. erectus	Chr13	4000000	5999999	0.00778958
H. erectus	Chr13	6000000	7999999	0.00811955
H. erectus	Chr13	8000000	9999999	0.00878235
H. erectus	Chr13	10000000	11999999	0.00939858
H. erectus	Chr13	12000000	13999999	0.00937136
H. erectus	Chr13	14000000	15198843	0.00962492
H. erectus	Chr14	0	1999999	0.00611155
H. erectus	Chr14	2000000	3999999	0.00806225
H. erectus	Chr14	4000000	5999999	0.00778714
H. erectus	Chr14	6000000	7999999	0.00851751
H. erectus	Chr14	8000000	9999999	0.00800515
H. erectus	Chr14	10000000	11999999	0.00805542
H. erectus	Chr14	12000000	13999999	0.00815797
H. erectus	Chr14	14000000	15999999	0.00933684
H. erectus	Chr14	16000000	16583198	0.0095673
H. erectus	Chr15	0	1999999	0.00769062
H. erectus	Chr15	2000000	3999999	0.00692408
H. erectus	Chr15	4000000	5999999	0.00635123
H. erectus	Chr15	6000000	7999999	0.00571995
H. erectus	Chr15	8000000	9999999	0.00715668
H. erectus	Chr15	10000000	10338647	0.0106812
H. erectus	Chr16	0	1999999	0.01046
H. erectus	Chr16	2000000	3999999	0.0093069
H. erectus	Chr16	4000000	5999999	0.00854483
H. erectus	Chr16	6000000	7999999	0.0091632
H. erectus	Chr16	8000000	9999999	0.00861847
H. erectus	Chr16	10000000	11999999	0.00957289
H. erectus	Chr16	12000000	13999999	0.0108018
H. erectus	Chr16	14000000	14659096	0.00669026
H. erectus	Chr17	0	1999999	0.00902752
H. erectus	Chr17	2000000	3999999	0.00797973
H. erectus	Chr17	4000000	5999999	0.00762557
H. erectus	Chr17	6000000	7999999	0.00767581
H. erectus	Chr17	8000000	9999999	0.00838695
H. erectus	Chr17	10000000	11999999	0.00798822
H. erectus	Chr17	12000000	13999999	0.00864254
H. erectus	Chr17	14000000	15999999	0.00866061
H. erectus	Chr17	16000000	17999999	0.00858249
H. erectus	Chr17	18000000	19999999	0.00958671
H. erectus	Chr17	20000000	21999999	0.0107325
H. erectus	Chr17	22000000	23001425	0.00757358
H. erectus	Chr18	0	1999999	0.00905796
H. erectus	Chr18	2000000	3999999	0.0092504
H. erectus	Chr18	4000000	5999999	0.00928625
H. erectus	Chr18	6000000	7999999	0.00845569
H. erectus	Chr18	8000000	9999999	0.00924666
H. erectus	Chr18	10000000	11999999	0.00894663
H. erectus	Chr18	12000000	13999999	0.00888956
H. erectus	Chr18	14000000	15999999	0.00953461
H. erectus	Chr18	16000000	17999999	0.00882999
H. erectus	Chr18	18000000	19999999	0.0107664
H. erectus	Chr18	20000000	20726299	0.00614309
H. erectus	Chr19	0	1999999	0.00925455
H. erectus	Chr19	2000000	3999999	0.00962106
H. erectus	Chr19	4000000	5999999	0.00902592
H. erectus	Chr19	6000000	7999999	0.00876945
H. erectus	Chr19	8000000	9999999	0.00833286
H. erectus	Chr19	10000000	11999999	0.00810064
H. erectus	Chr19	12000000	13999999	0.00982545
H. erectus	Chr19	14000000	15999999	0.00948184
H. erectus	Chr19	16000000	17999999	0.00968588
H. erectus	Chr19	18000000	19999999	0.00989273
H. erectus	Chr19	20000000	20521517	0.00880342
H. erectus	Chr20	0	1999999	0.00872509
H. erectus	Chr20	2000000	3999999	0.0090322
H. erectus	Chr20	4000000	5999999	0.00862522
H. erectus	Chr20	6000000	7999999	0.00859193
H. erectus	Chr20	8000000	9999999	0.00852697
H. erectus	Chr20	10000000	11999999	0.0084389
H. erectus	Chr20	12000000	13999999	0.00913513
H. erectus	Chr20	14000000	15999999	0.00934303
H. erectus	Chr20	16000000	17999999	0.0110119
H. erectus	Chr20	18000000	19096086	0.00775081
H. erectus	Chr21	0	1999999	0.0082446
H. erectus	Chr21	2000000	3999999	0.00812289
H. erectus	Chr21	4000000	5999999	0.00729009
H. erectus	Chr21	6000000	7999999	0.00801954
H. erectus	Chr21	8000000	9999999	0.00889836
H. erectus	Chr21	10000000	11999999	0.00815059
H. erectus	Chr21	12000000	13999999	0.00843838
H. erectus	Chr21	14000000	15999999	0.008718
H. erectus	Chr21	16000000	17999999	0.00849092
H. erectus	Chr21	18000000	19999999	0.00864519
H. erectus	Chr21	20000000	21999999	0.00894776
H. erectus	Chr21	22000000	23999999	0.00920952
H. erectus	Chr21	24000000	25999999	0.00917199
H. erectus	Chr21	26000000	26406474	0.00831808
H. erectus	Chr22	0	1999999	0.00911924
H. erectus	Chr22	2000000	3999999	0.00977678
H. erectus	Chr22	4000000	5999999	0.00812926
H. erectus	Chr22	6000000	7999999	0.00758652
H. erectus	Chr22	8000000	9999999	0.00715571
H. erectus	Chr22	10000000	11999999	0.0079591
H. erectus	Chr22	12000000	13999999	0.00853285
H. erectus	Chr22	14000000	15999999	0.0085321
H. erectus	Chr22	16000000	17999999	0.00895411
H. erectus	Chr22	18000000	19999999	0.00868883
H. erectus	Chr22	20000000	21999999	0.00886599
H. erectus	Chr22	22000000	23999999	0.00819535
H. erectus	Chr22	24000000	24399998	0.00728158
H. fuscus	Chr1	0	1999999	0.00710412
H. fuscus	Chr1	2000000	3999999	0.00843271
H. fuscus	Chr1	4000000	5999999	0.00983345
H. fuscus	Chr1	6000000	7999999	0.0107032
H. fuscus	Chr1	8000000	9999999	0.0110374
H. fuscus	Chr1	10000000	11999999	0.00870603
H. fuscus	Chr1	12000000	13999999	0.00749187
H. fuscus	Chr1	14000000	15999999	0.00736066
H. fuscus	Chr1	16000000	17999999	0.0069868
H. fuscus	Chr1	18000000	19999999	0.00544349
H. fuscus	Chr1	20000000	21999999	0.00563444
H. fuscus	Chr1	22000000	23999999	0.00585596
H. fuscus	Chr1	24000000	25999999	0.00497229
H. fuscus	Chr1	26000000	27999999	0.00547739
H. fuscus	Chr1	28000000	29999999	0.00481604
H. fuscus	Chr1	30000000	31999999	0.00580161
H. fuscus	Chr1	32000000	33999999	0.00775124
H. fuscus	Chr1	34000000	35976506	0.0109513
H. fuscus	Chr2	0	1999999	0.00539315
H. fuscus	Chr2	2000000	3999999	0.00909145
H. fuscus	Chr2	4000000	5999999	0.010302
H. fuscus	Chr2	6000000	7999999	0.00981151
H. fuscus	Chr2	8000000	9999999	0.00915395
H. fuscus	Chr2	10000000	11999999	0.00786121
H. fuscus	Chr2	12000000	13999999	0.00724173
H. fuscus	Chr2	14000000	15999999	0.00622791
H. fuscus	Chr2	16000000	17999999	0.0066243
H. fuscus	Chr2	18000000	19999999	0.0061143
H. fuscus	Chr2	20000000	21999999	0.00751436
H. fuscus	Chr2	22000000	23999999	0.00635025
H. fuscus	Chr2	24000000	25999999	0.00628958
H. fuscus	Chr2	26000000	27999999	0.00729216
H. fuscus	Chr2	28000000	29999999	0.00758138
H. fuscus	Chr2	30000000	31999999	0.006149
H. fuscus	Chr2	32000000	32585208	0.00698982
H. fuscus	Chr3	0	1999999	0.00797585
H. fuscus	Chr3	2000000	3999999	0.00880456
H. fuscus	Chr3	4000000	5999999	0.00675844
H. fuscus	Chr3	6000000	7999999	0.00761384
H. fuscus	Chr3	8000000	9999999	0.00999444
H. fuscus	Chr3	10000000	11999999	0.0101356
H. fuscus	Chr3	12000000	13999999	0.00982773
H. fuscus	Chr3	14000000	15999999	0.009141
H. fuscus	Chr3	16000000	17999999	0.00718471
H. fuscus	Chr3	18000000	19999999	0.00695493
H. fuscus	Chr3	20000000	21999999	0.00741526
H. fuscus	Chr3	22000000	22949005	0.00727125
H. fuscus	Chr4	0	1999999	0.0101651
H. fuscus	Chr4	2000000	3999999	0.00953161
H. fuscus	Chr4	4000000	5999999	0.00871294
H. fuscus	Chr4	6000000	7999999	0.0082398
H. fuscus	Chr4	8000000	9999999	0.00806569
H. fuscus	Chr4	10000000	11999999	0.00675538
H. fuscus	Chr4	12000000	13999999	0.0073038
H. fuscus	Chr4	14000000	15999999	0.00754677
H. fuscus	Chr4	16000000	17999999	0.0074371
H. fuscus	Chr4	18000000	19999999	0.00756851
H. fuscus	Chr4	20000000	21418693	0.00795929
H. fuscus	Chr5	0	1999999	0.00822765
H. fuscus	Chr5	2000000	3999999	0.00878881
H. fuscus	Chr5	4000000	5999999	0.0114417
H. fuscus	Chr5	6000000	7999999	0.0102392
H. fuscus	Chr5	8000000	9999999	0.00891529
H. fuscus	Chr5	10000000	11999999	0.00865104
H. fuscus	Chr5	12000000	13999999	0.00876601
H. fuscus	Chr5	14000000	15999999	0.00782936
H. fuscus	Chr5	16000000	17999999	0.00876007
H. fuscus	Chr5	18000000	19988562	0.00824638
H. fuscus	Chr6	0	1999999	0.00674939
H. fuscus	Chr6	2000000	3999999	0.0085306
H. fuscus	Chr6	4000000	5999999	0.007246
H. fuscus	Chr6	6000000	7999999	0.00735059
H. fuscus	Chr6	8000000	9999999	0.00767358
H. fuscus	Chr6	10000000	11999999	0.00874112
H. fuscus	Chr6	12000000	13999999	0.00716046
H. fuscus	Chr6	14000000	15999999	0.00720357
H. fuscus	Chr6	16000000	17999999	0.00889503
H. fuscus	Chr6	18000000	19999999	0.00852002
H. fuscus	Chr6	20000000	21626043	0.00672529
H. fuscus	Chr7	0	1999999	0.00767272
H. fuscus	Chr7	2000000	3999999	0.00736002
H. fuscus	Chr7	4000000	5999999	0.00713848
H. fuscus	Chr7	6000000	7999999	0.00912818
H. fuscus	Chr7	8000000	9999999	0.00977413
H. fuscus	Chr7	10000000	11999999	0.00906327
H. fuscus	Chr7	12000000	13999999	0.00880919
H. fuscus	Chr7	14000000	15999999	0.00801004
H. fuscus	Chr7	16000000	17999999	0.00803575
H. fuscus	Chr7	18000000	18009646	0.00803575
H. fuscus	Chr8	0	1999999	0.00982498
H. fuscus	Chr8	2000000	3999999	0.0102977
H. fuscus	Chr8	4000000	5999999	0.00943206
H. fuscus	Chr8	6000000	7999999	0.00933258
H. fuscus	Chr8	8000000	9999999	0.00851051
H. fuscus	Chr8	10000000	11999999	0.00890693
H. fuscus	Chr8	12000000	13889474	0.00987333
H. fuscus	Chr9	0	1999999	0.00953077
H. fuscus	Chr9	2000000	3999999	0.0104248
H. fuscus	Chr9	4000000	5999999	0.00965123
H. fuscus	Chr9	6000000	7999999	0.00912168
H. fuscus	Chr9	8000000	9999999	0.00863377
H. fuscus	Chr9	10000000	11999999	0.00948499
H. fuscus	Chr9	12000000	13465307	0.00978323
H. fuscus	Chr10	0	1999999	0.00902928
H. fuscus	Chr10	2000000	3999999	0.00896183
H. fuscus	Chr10	4000000	5999999	0.00808864
H. fuscus	Chr10	6000000	7999999	0.00946734
H. fuscus	Chr10	8000000	9999999	0.00844723
H. fuscus	Chr10	10000000	11328791	0.00851986
H. fuscus	Chr11	0	1999999	0.0101674
H. fuscus	Chr11	2000000	3999999	0.00986355
H. fuscus	Chr11	4000000	5999999	0.00960168
H. fuscus	Chr11	6000000	7194405	0.00899449
H. fuscus	Chr12	0	1999999	0.00796829
H. fuscus	Chr12	2000000	3999999	0.00962287
H. fuscus	Chr12	4000000	5999999	0.00955818
H. fuscus	Chr12	6000000	7999999	0.00866718
H. fuscus	Chr12	8000000	9999999	0.00862649
H. fuscus	Chr12	10000000	10853637	0.00973365
H. fuscus	Chr13	0	1999999	0.00820404
H. fuscus	Chr13	2000000	3999999	0.00937031
H. fuscus	Chr13	4000000	5999999	0.00920609
H. fuscus	Chr13	6000000	7999999	0.00917367
H. fuscus	Chr13	8000000	9999999	0.00906238
H. fuscus	Chr13	10000000	11999999	0.00896856
H. fuscus	Chr13	12000000	13999999	0.00855424
H. fuscus	Chr13	14000000	15198843	0.00970091
H. fuscus	Chr14	0	1999999	0.00784216
H. fuscus	Chr14	2000000	3999999	0.00802894
H. fuscus	Chr14	4000000	5999999	0.00840328
H. fuscus	Chr14	6000000	7999999	0.00959374
H. fuscus	Chr14	8000000	9999999	0.0103999
H. fuscus	Chr14	10000000	11999999	0.00971785
H. fuscus	Chr14	12000000	13999999	0.00937615
H. fuscus	Chr14	14000000	15999999	0.00743544
H. fuscus	Chr14	16000000	16583198	0.00790105
H. fuscus	Chr15	0	1999999	0.0107383
H. fuscus	Chr15	2000000	3999999	0.00928688
H. fuscus	Chr15	4000000	5999999	0.00854304
H. fuscus	Chr15	6000000	7999999	0.00793064
H. fuscus	Chr15	8000000	9999999	0.00948362
H. fuscus	Chr15	10000000	10338647	0.00941731
H. fuscus	Chr16	0	1999999	0.00962677
H. fuscus	Chr16	2000000	3999999	0.00965029
H. fuscus	Chr16	4000000	5999999	0.00851689
H. fuscus	Chr16	6000000	7999999	0.00816176
H. fuscus	Chr16	8000000	9999999	0.00821044
H. fuscus	Chr16	10000000	11999999	0.00846563
H. fuscus	Chr16	12000000	13999999	0.00796657
H. fuscus	Chr16	14000000	14659096	0.00826503
H. fuscus	Chr17	0	1999999	0.0069398
H. fuscus	Chr17	2000000	3999999	0.00615547
H. fuscus	Chr17	4000000	5999999	0.00598796
H. fuscus	Chr17	6000000	7999999	0.00687195
H. fuscus	Chr17	8000000	9999999	0.00819986
H. fuscus	Chr17	10000000	11999999	0.00867463
H. fuscus	Chr17	12000000	13999999	0.00936693
H. fuscus	Chr17	14000000	15999999	0.00985123
H. fuscus	Chr17	16000000	17999999	0.0103656
H. fuscus	Chr17	18000000	19999999	0.0104753
H. fuscus	Chr17	20000000	21999999	0.00678851
H. fuscus	Chr17	22000000	23001425	0.00776739
H. fuscus	Chr18	0	1999999	0.00808395
H. fuscus	Chr18	2000000	3999999	0.00923539
H. fuscus	Chr18	4000000	5999999	0.00993248
H. fuscus	Chr18	6000000	7999999	0.00941328
H. fuscus	Chr18	8000000	9999999	0.00935704
H. fuscus	Chr18	10000000	11999999	0.00859342
H. fuscus	Chr18	12000000	13999999	0.00881707
H. fuscus	Chr18	14000000	15999999	0.00737593
H. fuscus	Chr18	16000000	17999999	0.00712762
H. fuscus	Chr18	18000000	19999999	0.00747554
H. fuscus	Chr18	20000000	20726299	0.00887246
H. fuscus	Chr19	0	1999999	0.00795329
H. fuscus	Chr19	2000000	3999999	0.00754675
H. fuscus	Chr19	4000000	5999999	0.00726922
H. fuscus	Chr19	6000000	7999999	0.00633066
H. fuscus	Chr19	8000000	9999999	0.00625836
H. fuscus	Chr19	10000000	11999999	0.00784747
H. fuscus	Chr19	12000000	13999999	0.00913404
H. fuscus	Chr19	14000000	15999999	0.00948058
H. fuscus	Chr19	16000000	17999999	0.00982279
H. fuscus	Chr19	18000000	19999999	0.0106921
H. fuscus	Chr19	20000000	20521517	0.00980679
H. fuscus	Chr20	0	1999999	0.00950265
H. fuscus	Chr20	2000000	3999999	0.00987193
H. fuscus	Chr20	4000000	5999999	0.00955944
H. fuscus	Chr20	6000000	7999999	0.00921252
H. fuscus	Chr20	8000000	9999999	0.00804501
H. fuscus	Chr20	10000000	11999999	0.00824553
H. fuscus	Chr20	12000000	13999999	0.00851435
H. fuscus	Chr20	14000000	15999999	0.00804159
H. fuscus	Chr20	16000000	17999999	0.00853048
H. fuscus	Chr20	18000000	19096086	0.00792101
H. fuscus	Chr21	0	1999999	0.00743709
H. fuscus	Chr21	2000000	3999999	0.00758224
H. fuscus	Chr21	4000000	5999999	0.00588573
H. fuscus	Chr21	6000000	7999999	0.00561401
H. fuscus	Chr21	8000000	9999999	0.00770969
H. fuscus	Chr21	10000000	11999999	0.0065093
H. fuscus	Chr21	12000000	13999999	0.00624338
H. fuscus	Chr21	14000000	15999999	0.00760961
H. fuscus	Chr21	16000000	17999999	0.0105424
H. fuscus	Chr21	18000000	19999999	0.010228
H. fuscus	Chr21	20000000	21999999	0.00933985
H. fuscus	Chr21	22000000	23999999	0.00930175
H. fuscus	Chr21	24000000	25999999	0.0087049
H. fuscus	Chr21	26000000	26406474	0.00934813
H. fuscus	Chr22	0	1999999	0.00905651
H. fuscus	Chr22	2000000	3999999	0.008092
H. fuscus	Chr22	4000000	5999999	0.00765813
H. fuscus	Chr22	6000000	7999999	0.00793644
H. fuscus	Chr22	8000000	9999999	0.00712694
H. fuscus	Chr22	10000000	11999999	0.00683294
H. fuscus	Chr22	12000000	13999999	0.00628224
H. fuscus	Chr22	14000000	15999999	0.00703453
H. fuscus	Chr22	16000000	17999999	0.00863298
H. fuscus	Chr22	18000000	19999999	0.00905109
H. fuscus	Chr22	20000000	21999999	0.010366
H. fuscus	Chr22	22000000	23999999	0.00882695
H. fuscus	Chr22	24000000	24399998	0.00778791
H. hippocampus	Chr1	0	1999999	0.00367667
H. hippocampus	Chr1	2000000	3999999	0.00442978
H. hippocampus	Chr1	4000000	5999999	0.0047272
H. hippocampus	Chr1	6000000	7999999	0.00528322
H. hippocampus	Chr1	8000000	9999999	0.00548019
H. hippocampus	Chr1	10000000	11999999	0.00484989
H. hippocampus	Chr1	12000000	13999999	0.00403688
H. hippocampus	Chr1	14000000	15999999	0.00345154
H. hippocampus	Chr1	16000000	17999999	0.003019
H. hippocampus	Chr1	18000000	19999999	0.00277706
[truncated: 2,642 more rows]

## Sheet: Fig.1b
((((((((((((Hrd1:0.00181,Hrd5:0.002549):1.38E-4,Hrd6:0.001975):1.28E-4,(Hrd7:0.002209,(Hrd8:0.001869,Hrd9:0.001997):7.8E-5):1.6E-4):0.001233,((HrdS1:0.002407,HrdS6:0.002513):7.9E-5,(HrdS4:0.002302,(HrdS2:0.001629,HrdS5:0.001547):8.09E-4):1.85E-4):7.1E-4):2.16E-4,((Hrd10:0.001831,Hrd3:0.00195):4.83E-4,((Hrd11:0.002212,Hrd2:0.002237):1.33E-4,(Hrd13:0.002361,(Hrd12:0.002145,(Hrd14:0.001929,Hrd4:0.00…
Full names for the abbreviation are as follows: H. abdominalis (Had), H. algiricus (Hag), H. barbouri (Hbb), H. casscsio (Hcc), H. camelopardalis (Hcd), H. comes (Hcm), H. capensis (Hcp), H. erectus (Het), H. fuscus (Hfc), H. hippocampus (Hhc), H. histrix (Hht), H. ingens (Hig), H. jayakari (Hjk), H. kelloggi (Hkg), H. kuda (Hku), H. mohnikei (Hmh), H. reidi (Hrd), H. subelongatus (Hsl), H. spino…

## Sheet: Fig.3b
Species	Years before the present	Ne (x 10^4)
H. abdominalis	10969	38.2127
H. abdominalis	12710.7	38.2127
H. abdominalis	14550.5	34.3864
H. abdominalis	16494.3	34.3864
H. abdominalis	18547.6	29.3603
H. abdominalis	20717	29.3603
H. abdominalis	23008.6	24.8758
H. abdominalis	25429.8	24.8758
H. abdominalis	27987.5	20.4331
H. abdominalis	30689.7	20.4331
H. abdominalis	33544.2	15.7504
H. abdominalis	36559.9	15.7504
H. abdominalis	39745.7	11.6375
H. abdominalis	43111.4	11.6375
H. abdominalis	46667.2	8.51842
H. abdominalis	50423.5	8.51842
H. abdominalis	54391.9	6.33241
H. abdominalis	58584.2	6.33241
H. abdominalis	63012.9	4.86024
H. abdominalis	67691.9	4.86024
H. abdominalis	72634.8	3.88463
H. abdominalis	77856.6	3.88463
H. abdominalis	83373.3	3.23725
H. abdominalis	89201.3	3.23725
H. abdominalis	95358	2.80259
H. abdominalis	101862	2.80259
H. abdominalis	108734	2.50655
H. abdominalis	115993	2.50655
H. abdominalis	123662	2.30236
H. abdominalis	131764	2.30236
H. abdominalis	140323	2.16007
H. abdominalis	149365	2.16007
H. abdominalis	158917	2.06008
H. abdominalis	169009	2.06008
H. abdominalis	179670	1.98919
H. abdominalis	190933	1.98919
H. abdominalis	202831	1.93774
H. abdominalis	215401	1.93774
H. abdominalis	228680	1.89788
H. abdominalis	242709	1.89788
H. abdominalis	257530	1.86278
H. abdominalis	273187	1.86278
H. abdominalis	289727	1.82659
H. abdominalis	307202	1.82659
H. abdominalis	325662	1.78513
H. abdominalis	345164	1.78513
H. abdominalis	365767	1.72221
H. abdominalis	387533	1.72221
H. abdominalis	410527	1.72221
H. abdominalis	434819	1.72221
H. algiricus	11069.4	1.81582
H. algiricus	12524.9	2.19329
H. algiricus	14126	2.19329
H. algiricus	15887.3	2.5991
H. algiricus	17824.7	2.5991
H. algiricus	19955.9	2.98334
H. algiricus	22300.3	2.98334
H. algiricus	24879.2	3.35646
H. algiricus	27716	3.35646
H. algiricus	30836.6	3.74027
H. algiricus	34269.3	3.74027
H. algiricus	38045.4	4.13799
H. algiricus	42199.1	4.13799
H. algiricus	46768.3	4.52118
H. algiricus	51794.6	4.52118
H. algiricus	57323.6	4.84289
H. algiricus	63405.6	4.84289
H. algiricus	70096	5.072
H. algiricus	77455.5	5.072
H. algiricus	85551.2	5.21667
H. algiricus	94456.6	5.21667
H. algiricus	104253	5.31529
H. algiricus	115029	5.31529
H. algiricus	126883	5.41238
H. algiricus	139922	5.41238
H. algiricus	154266	5.5447
H. algiricus	170045	5.5447
H. algiricus	187401	5.74003
H. algiricus	206494	5.74003
H. algiricus	227497	6.01381
H. algiricus	250600	6.01381
H. algiricus	276014	6.35423
H. algiricus	303971	6.35423
H. algiricus	334723	6.70995
H. algiricus	368551	6.70995
H. algiricus	405763	7.00722
H. algiricus	446697	7.00722
H. algiricus	491726	7.19106
H. algiricus	541258	7.19106
H. algiricus	595745	7.24997
H. algiricus	655682	7.24997
H. algiricus	721614	7.24997
H. algiricus	794140	7.24997
H. barbouri	10901.4	1.62919
H. barbouri	12174.8	1.96348
H. barbouri	13577.4	1.96348
H. barbouri	15122.3	2.31976
H. barbouri	16824	2.31976
H. barbouri	18698.3	2.65112
H. barbouri	20762.8	2.65112
H. barbouri	23036.8	2.89525
H. barbouri	25541.5	2.89525
H. barbouri	28300.3	3.00753
H. barbouri	31339	3.00753
H. barbouri	34686	2.99363
H. barbouri	38372.7	2.99363
H. barbouri	42433.3	2.90359
H. barbouri	46906	2.90359
H. barbouri	51832.5	2.79648
H. barbouri	57258.8	2.79648
H. barbouri	63235.7	2.71594
H. barbouri	69819	2.71594
H. barbouri	77070.2	2.68782
H. barbouri	85057.1	2.68782
H. barbouri	93854.5	2.7277
H. barbouri	103544	2.7277
H. barbouri	114217	2.84714
H. barbouri	125973	2.84714
H. barbouri	138922	3.05635
H. barbouri	153185	3.05635
H. barbouri	168894	3.36986
H. barbouri	186198	3.36986
H. barbouri	205257	3.81705
H. barbouri	226250	3.81705
H. barbouri	249373	4.4503
H. barbouri	274841	4.4503
H. barbouri	302895	5.74306
H. barbouri	333794	5.74306
H. barbouri	367828	5.74306
H. barbouri	405316	5.74306
H. casscsio	10792.9	5.91631
H. casscsio	13129.5	5.91631
H. casscsio	15653.5	6.19333
H. casscsio	18380.1	6.19333
H. casscsio	21325.5	7.31879
H. casscsio	24507.3	7.31879
H. casscsio	27944.5	8.77904
H. casscsio	31657.6	8.77904
H. casscsio	35668.8	10.1536
H. casscsio	40001.8	10.1536
H. casscsio	44682.7	11.1792
H. casscsio	49739.2	11.1792
H. casscsio	55201.4	11.8396
H. casscsio	61102.2	11.8396
H. casscsio	67476.5	12.1588
H. casscsio	74362.3	12.1588
H. casscsio	81800.9	12.1291
H. casscsio	89836.4	12.1291
H. casscsio	98517	11.7838
H. casscsio	107894	11.7838
H. casscsio	118024	11.1991
H. casscsio	128967	11.1991
H. casscsio	140788	10.4689
H. casscsio	153558	10.4689
H. casscsio	167352	9.69086
H. casscsio	182254	9.69086
H. casscsio	198352	8.95737
H. casscsio	215742	8.95737
H. casscsio	234527	8.3394
H. casscsio	254821	8.3394
H. casscsio	276743	7.87204
H. casscsio	300424	7.87204
H. casscsio	326006	7.55367
H. casscsio	353642	7.55367
H. casscsio	383495	7.35972
H. casscsio	415744	7.35972
H. casscsio	450582	7.26034
H. casscsio	488215	7.26034
H. casscsio	528869	7.22954
H. casscsio	572786	7.22954
H. casscsio	620228	7.24605
H. casscsio	671477	7.24605
H. casscsio	726840	7.29215
H. casscsio	786646	7.29215
H. casscsio	851252	7.35286
H. casscsio	921043	7.35286
H. casscsio	996436	7.41744
H. casscsio	1.07788e+06	7.41744
H. casscsio	1.16586e+06	7.48956
H. casscsio	1.2609e+06	7.48956
H. casscsio	1.36357e+06	7.48956
H. casscsio	1.47448e+06	7.48956
H. camelopardalis	10487.1	0.941626
H. camelopardalis	11305.5	0.941626
H. camelopardalis	12167.1	0.753257
H. camelopardalis	13074.4	0.753257
H. camelopardalis	14029.8	0.635516
H. camelopardalis	15035.8	0.635516
H. camelopardalis	16095	0.558632
H. camelopardalis	17210.3	0.558632
H. camelopardalis	18384.7	0.506677
H. camelopardalis	19621.3	0.506677
H. camelopardalis	20923.3	0.470804
H. camelopardalis	22294.3	0.470804
H. camelopardalis	23738	0.446094
H. camelopardalis	25258.1	0.446094
H. camelopardalis	26858.7	0.42988
H. camelopardalis	28544	0.42988
H. camelopardalis	30318.6	0.420771
H. camelopardalis	32187.2	0.420771
H. camelopardalis	34154.7	0.418184
H. camelopardalis	36226.5	0.418184
H. camelopardalis	38407.9	0.422439
H. camelopardalis	40704.9	0.422439
H. camelopardalis	43123.5	0.43555
H. camelopardalis	45670.2	0.43555
H. camelopardalis	48351.8	0.463073
H. camelopardalis	51175.4	0.463073
H. camelopardalis	54148.5	0.518142
H. camelopardalis	57279.1	0.518142
H. camelopardalis	60575.4	0.630009
H. camelopardalis	64046.4	0.630009
H. camelopardalis	67701.2	0.860303
H. camelopardalis	71549.5	0.860303
H. camelopardalis	75601.6	1.55672
H. camelopardalis	79868.3	1.55672
H. camelopardalis	84360.9	1.55672
H. camelopardalis	89091.4	1.55672
H. comes	10582.4	13.0858
H. comes	12033.4	13.0858
H. comes	13609.7	9.6061
H. comes	15322.1	9.6061
H. comes	17182.5	7.2765
H. comes	19203.5	7.2765
H. comes	21399.1	5.58908
H. comes	23784.3	5.58908
H. comes	26375.7	4.41487
H. comes	29190.8	4.41487
H. comes	32249	3.62346
H. comes	35571.4	3.62346
H. comes	39180.8	3.11733
H. comes	43102	3.11733
H. comes	47361.8	2.82592
H. comes	51989.6	2.82592
H. comes	57017.1	2.7003
H. comes	62478.9	2.7003
H. comes	68412.4	2.71157
H. comes	74858.4	2.71157
H. comes	81861.2	2.846
H. comes	89468.9	2.846
H. comes	97733.7	3.09833
H. comes	106712	3.09833
H. comes	116467	3.46379
H. comes	127063	3.46379
H. comes	138575	3.93126
H. comes	151082	3.93126
H. comes	164668	4.48042
H. comes	179428	4.48042
H. comes	195463	5.08059
H. comes	212883	5.08059
H. comes	231808	5.68515
H. comes	252367	5.68515
H. comes	274703	6.22919
H. comes	298967	6.22919
H. comes	325327	6.64556
H. comes	353964	6.64556
H. comes	385075	6.89809
H. comes	418872	6.89809
H. comes	455589	7.01413
H. comes	495478	7.01413
H. comes	538812	7.13337
H. comes	585888	7.13337
H. comes	637031	7.13337
H. comes	692592	7.13337
H. capensis	10072.8	4.79652
H. capensis	11444.9	4.18082
H. capensis	12945.4	4.18082
H. capensis	14586.5	3.7691
H. capensis	16381.4	3.7691
H. capensis	18344.5	3.43096
H. capensis	20491.5	3.43096
H. capensis	22839.7	3.18862
H. capensis	25407.8	3.18862
H. capensis	28216.5	3.07783
H. capensis	31288.5	3.07783
H. capensis	34648.2	3.09678
H. capensis	38322.7	3.09678
H. capensis	42341.4	3.21482
H. capensis	46736.7	3.21482
H. capensis	51543.7	3.39189
H. capensis	56801.2	3.39189
H. capensis	62551.2	3.60446
H. capensis	68839.9	3.60446
H. capensis	75717.9	3.85659
H. capensis	83240.2	3.85659
H. capensis	91467.3	4.15717
H. capensis	100465	4.15717
H. capensis	110306	4.499
H. capensis	121069	4.499
H. capensis	132840	4.86357
H. capensis	145714	4.86357
H. capensis	159795	5.22648
H. capensis	175194	5.22648
H. capensis	192037	5.55745
H. capensis	210457	5.55745
H. capensis	230603	5.83362
H. capensis	252637	5.83362
H. capensis	276734	6.05104
H. capensis	303090	6.05104
H. capensis	331915	6.21716
H. capensis	363441	6.21716
H. capensis	397920	6.33656
H. capensis	435629	6.33656
H. capensis	476872	6.40092
H. capensis	521979	6.40092
H. capensis	571311	6.36454
H. capensis	625266	6.36454
H. capensis	684276	6.36454
H. capensis	748814	6.36454
H. erectus	13935.1	59.4736
H. erectus	21531.1	59.4736
H. erectus	29580.9	102.379
H. erectus	38110.6	102.379
H. erectus	47149.6	81.9639
H. erectus	56727.4	81.9639
H. erectus	66875.9	82.1363
H. erectus	77630.1	82.1363
H. erectus	89025.3	90.5448
H. erectus	101100	90.5448
H. erectus	113895	85.8932
H. erectus	127454	85.8932
H. erectus	141821	78.6998
H. erectus	157044	78.6998
H. erectus	173176	73.9164
H. erectus	190269	73.9164
H. erectus	208383	64.8029
H. erectus	227576	64.8029
H. erectus	247915	51.9063
H. erectus	269465	51.9063
H. erectus	292302	39.541
H. erectus	316500	39.541
H. erectus	342141	29.7649
H. erectus	369313	29.7649
H. erectus	398103	22.8462
H. erectus	428612	22.8462
H. erectus	460939	18.3236
H. erectus	495195	18.3236
H. erectus	531494	15.5529
H. erectus	569958	15.5529
H. erectus	610716	13.9575
H. erectus	653904	13.9575
H. erectus	699668	13.1013
H. erectus	748161	13.1013
H. erectus	799548	12.6849
H. erectus	853997	12.6849
H. erectus	911694	12.514
H. erectus	972834	12.514
H. erectus	1.03762e+06	12.4659
H. erectus	1.10627e+06	12.4659
H. erectus	1.17901e+06	12.4643
H. erectus	1.25609e+06	12.4643
H. erectus	1.33777e+06	12.4625
H. erectus	1.42432e+06	12.4625
H. erectus	1.51603e+06	12.4324
H. erectus	1.61321e+06	12.4324
H. erectus	1.71619e+06	12.3581
H. erectus	1.82531e+06	12.3581
H. erectus	1.94093e+06	12.2312
H. erectus	2.06346e+06	12.2312
H. erectus	2.19328e+06	12.0522
H. erectus	2.33086e+06	12.0522
H. erectus	2.47663e+06	11.7586
H. erectus	2.6311e+06	11.7586
H. erectus	2.79479e+06	11.7586
H. erectus	2.96823e+06	11.7586
H. fuscus	11703.6	6.68498
H. fuscus	14626.3	5.81361
H. fuscus	17779.6	5.81361
H. fuscus	21181.6	6.96179
H. fuscus	24852	6.96179
H. fuscus	28811.8	9.52693
H. fuscus	33084	9.52693
H. fuscus	37693.2	12.6841
H. fuscus	42666.1	12.6841
H. fuscus	48031.1	15.2875
H. fuscus	53819.5	15.2875
H. fuscus	60064.5	16.7801
H. fuscus	66802.1	16.7801
H. fuscus	74071.1	17.2944
H. fuscus	81913.5	17.2944
H. fuscus	90374.6	17.1821
H. fuscus	99503.3	17.1821
H. fuscus	109352	16.7262
H. fuscus	119977	16.7262
H. fuscus	131441	16.0763
H. fuscus	143809	16.0763
H. fuscus	157153	15.2818
H. fuscus	171550	15.2818
H. fuscus	187081	14.3495
H. fuscus	203839	14.3495
H. fuscus	221918	13.3178
H. fuscus	241423	13.3178
H. fuscus	262467	12.2714
H. fuscus	285171	12.2714
H. fuscus	309666	11.3052
H. fuscus	336093	11.3052
H. fuscus	364605	10.4951
H. fuscus	395366	10.4951
H. fuscus	428554	9.8804
H. fuscus	464359	9.8804
H. fuscus	502989	9.46343
H. fuscus	544667	9.46343
H. fuscus	589632	9.22088
H. fuscus	638144	9.22088
H. fuscus	690483	9.11662
H. fuscus	746951	9.11662
H. fuscus	807873	9.10923
H. fuscus	873601	9.10923
H. fuscus	944514	9.15866
H. fuscus	1.02102e+06	9.15866
H. fuscus	1.10356e+06	9.2324
H. fuscus	1.19262e+06	9.2324
H. fuscus	1.28869e+06	9.30727
H. fuscus	1.39235e+06	9.30727
H. fuscus	1.50419e+06	9.37723
H. fuscus	1.62484e+06	9.37723
H. fuscus	1.75502e+06	9.37723
H. fuscus	1.89546e+06	9.37723
H. hippocampus	11262.1	41.5329
H. hippocampus	15472.2	20.5893
H. hippocampus	19932.5	20.5893
H. hippocampus	24659	21.132
H. hippocampus	29667	21.132
H. hippocampus	34973.4	23.311
H. hippocampus	40595.2	23.311
H. hippocampus	46552.7	27.2401
H. hippocampus	52864.4	27.2401
H. hippocampus	59552.7	33.0525
H. hippocampus	66639.1	33.0525
H. hippocampus	74147.4	36.9115
H. hippocampus	82103	36.9115
H. hippocampus	90532.8	38.3221
H. hippocampus	99464.1	38.3221
H. hippocampus	108928	36.626
H. hippocampus	118955	36.626
H. hippocampus	129580	31.3902
H. hippocampus	140838	31.3902
H. hippocampus	152766	24.378
H. hippocampus	165404	24.378
H. hippocampus	178795	17.7578
H. hippocampus	192985	17.7578
H. hippocampus	208019	12.7049
H. hippocampus	223949	12.7049
H. hippocampus	240828	9.35657
H. hippocampus	258711	9.35657
H. hippocampus	277661	7.33717
H. hippocampus	297739	7.33717
H. hippocampus	319013	6.2208
H. hippocampus	341554	6.2208
H. hippocampus	365438	5.70407
H. hippocampus	390744	5.70407
H. hippocampus	417558	5.6093
H. hippocampus	445969	5.6093
H. hippocampus	476072	5.84449
H. hippocampus	507969	5.84449
H. hippocampus	541766	6.36461
H. hippocampus	577575	6.36461
H. hippocampus	615517	7.13056
H. hippocampus	655720	7.13056
H. hippocampus	698317	8.0588
H. hippocampus	743452	8.0588
H. hippocampus	791275	8.97497
H. hippocampus	841946	8.97497
H. hippocampus	895636	9.62408
H. hippocampus	952524	9.62408
H. hippocampus	1.0128e+06	9.79528
H. hippocampus	1.07667e+06	9.79528
H. hippocampus	1.14434e+06	9.47409
H. hippocampus	1.21604e+06	9.47409
H. hippocampus	1.29201e+06	8.65
H. hippocampus	1.37251e+06	8.65
H. hippocampus	1.45781e+06	8.65
H. hippocampus	1.54818e+06	8.65
H. histrix	10439	17.411
H. histrix	12122.1	17.411
H. histrix	13906.6	20.0064
H. histrix	15798.8	20.0064
H. histrix	17804.8	19.1769
H. histrix	19932	19.1769
H. histrix	22187.4	16.2748
H. histrix	24578.8	16.2748
H. histrix	27114.5	12.7747
H. histrix	29802.9	12.7747
H. histrix	32653.5	9.51697
H. histrix	35675.9	9.51697
H. histrix	38880.5	6.94885
H. histrix	42278.4	6.94885
H. histrix	45881.1	5.14446
H. histrix	49701.1	5.14446
H. histrix	53751.4	3.95618
H. histrix	58046	3.95618
H. histrix	62599.5	3.19725
H. histrix	67427.5	3.19725
H. histrix	72546.6	2.72089
H. histrix	77974.3	2.72089
H. histrix	83729.3	2.42864
H. histrix	89831.4	2.42864
H. histrix	96301.3	2.25893
H. histrix	103161	2.25893
H. histrix	110435	2.17467
H. histrix	118147	2.17467
H. histrix	126324	2.15399
H. histrix	134995	2.15399
H. histrix	144188	2.18363
H. histrix	153935	2.18363
H. histrix	164270	2.25585
H. histrix	175228	2.25585
H. histrix	186847	2.36775
H. histrix	199167	2.36775
H. histrix	212229	2.52283
H. histrix	226079	2.52283
H. histrix	240764	2.73434
H. histrix	256334	2.73434
H. histrix	272843	3.02909
H. histrix	290348	3.02909
H. histrix	308908	3.4513
H. histrix	328587	3.4513
H. histrix	349452	4.06561
H. histrix	371576	4.06561
H. histrix	395033	5.32882
H. histrix	419905	5.32882
H. histrix	446277	5.32882
H. histrix	474238	5.32882
H. ingens	12183.9	21.1775
H. ingens	14659.4	21.1775
H. ingens	17282.7	25.0027
H. ingens	20062.5	25.0027
H. ingens	23008.2	28.4723
H. ingens	26129.7	28.4723
H. ingens	29437.7	27.8972
H. ingens	32943.3	27.8972
H. ingens	36658	23.6373
H. ingens	40594.3	23.6373
H. ingens	44765.8	18.2828
H. ingens	49186.2	18.2828
H. ingens	53870.7	13.6584
H. ingens	58834.6	13.6584
H. ingens	64095.1	10.1975
H. ingens	69669.5	10.1975
H. ingens	75576.5	7.75312
H. ingens	81836.4	7.75312
H. ingens	88469.9	6.0807
H. ingens	95499.3	6.0807
H. ingens	102949	4.96577
H. ingens	110842	4.96577
H. ingens	119208	4.23879
H. ingens	128072	4.23879
H. ingens	137466	3.77582
H. ingens	147420	3.77582
H. ingens	157969	3.495
H. ingens	169147	3.495
H. ingens	180993	3.34654
H. ingens	193546	3.34654
H. ingens	206848	3.29955
H. ingens	220945	3.29955
H. ingens	235883	3.33219
H. ingens	251713	3.33219
H. ingens	268487	3.42733
H. ingens	286263	3.42733
H. ingens	305101	3.57186
H. ingens	325063	3.57186
H. ingens	346216	3.75653
H. ingens	368633	3.75653
H. ingens	392387	3.9728
H. ingens	417560	3.9728
H. ingens	444236	4.20624
H. ingens	472503	4.20624
H. ingens	502459	4.42915
H. ingens	534203	4.42915
H. ingens	567842	4.59882
H. ingens	603489	4.59882
H. ingens	641264	4.66333
H. ingens	681294	4.66333
H. ingens	723714	4.66333
H. ingens	768666	4.66333
H. jayakari	10064	15.2297
H. jayakari	11156.7	15.2297
H. jayakari	12296.7	9.75593
H. jayakari	13486	9.75593
H. jayakari	14726.8	6.25005
H. jayakari	16021.2	6.25005
H. jayakari	17371.6	4.10714
H. jayakari	18780.3	4.10714
H. jayakari	20250.1	2.82648
H. jayakari	21783.4	2.82648
H. jayakari	23383.2	2.05384
H. jayakari	25052	2.05384
H. jayakari	26792.9	1.57468
H. jayakari	28609.4	1.57468
H. jayakari	30504.4	1.26745
H. jayakari	32481.3	1.26745
H. jayakari	34543.6	1.06449
H. jayakari	36695.3	1.06449
H. jayakari	38940	0.927989
H. jayakari	41281.9	0.927989
H. jayakari	43724.9	0.835473
H. jayakari	46273.8	0.835473
H. jayakari	48932.7	0.772073
H. jayakari	51706.9	0.772073
H. jayakari	54601	0.727206
H. jayakari	57620.3	0.727206
H. jayakari	60770	0.693583
H. jayakari	64056.3	0.693583
H. jayakari	67484.5	0.666716
H. jayakari	71061.1	0.666716
H. jayakari	74792.5	0.644157
H. jayakari	78685	0.644157
H. jayakari	82746.2	0.624698
H. jayakari	86982.9	0.624698
H. jayakari	91403	0.607693
H. jayakari	96014.2	0.607693
H. jayakari	100825	0.592633
H. jayakari	105844	0.592633
H. jayakari	111080	0.578964
H. jayakari	116542	0.578964
H. jayakari	122241	0.566108
H. jayakari	128186	0.566108
H. jayakari	134388	0.550546
H. jayakari	140859	0.550546
H. jayakari	147610	0.550546
H. jayakari	154652	0.550546
H. kelloggi	10833.7	1.13287
H. kelloggi	12025.5	1.27495
H. kelloggi	13328.2	1.27495
H. kelloggi	14752.1	1.43511
H. kelloggi	16308.4	1.43511
H. kelloggi	18009.6	1.59092
H. kelloggi	19868.9	1.59092
H. kelloggi	21901.2	1.73573
H. kelloggi	24122.5	1.73573
H. kelloggi	26550.5	1.86595
H. kelloggi	29204.3	1.86595
H. kelloggi	32105	1.97504
H. kelloggi	35275.5	1.97504
H. kelloggi	38741	2.05746
H. kelloggi	42528.7	2.05746
H. kelloggi	46668.9	2.11299
H. kelloggi	51194.1	2.11299
H. kelloggi	56140.3	2.14679
H. kelloggi	61546.6	2.14679
H. kelloggi	67455.8	2.17089
H. kelloggi	73914.6	2.17089
H. kelloggi	80974.3	2.20952
H. kelloggi	88690.7	2.20952
H. kelloggi	97124.8	2.29833
H. kelloggi	106343	2.29833
H. kelloggi	116420	2.48623
H. kelloggi	127433	2.48623
H. kelloggi	139471	2.85982
H. kelloggi	152629	2.85982
H. kelloggi	167011	3.58641
H. kelloggi	182730	3.58641
H. kelloggi	199912	4.92548
H. kelloggi	218692	4.92548
H. kelloggi	239219	7.80983
H. kelloggi	261655	7.80983
H. kelloggi	286178	7.80983
H. kelloggi	312983	7.80983
H. kuda	10617.1	1.22704
H. kuda	11711.8	1.01956
H. kuda	12903.4	1.01956
H. kuda	14200.3	0.909788
H. kuda	15611.9	0.909788
H. kuda	17148.3	0.868779
H. kuda	18820.6	0.868779
H. kuda	20640.7	0.878082
H. kuda	22621.8	0.878082
H. kuda	24778.1	0.927836
H. kuda	27125	0.927836
H. kuda	29679.5	1.0142
H. kuda	32459.8	1.0142
H. kuda	35486	1.1361
H. kuda	38779.8	1.1361
H. kuda	42364.8	1.29251
H. kuda	46266.9	1.29251
H. kuda	50513.9	1.48342
H. kuda	55136.6	1.48342
H. kuda	60167.9	1.71208
H. kuda	65644.2	1.71208
H. kuda	71604.7	1.98615
H. kuda	78092.3	1.98615
H. kuda	85153.6	2.32087
H. kuda	92839.2	2.32087
H. kuda	101204	2.74832
H. kuda	110309	2.74832
H. kuda	120219	3.32931
H. kuda	131006	3.32931
H. kuda	142746	4.14721
H. kuda	155524	4.14721
H. kuda	169432	5.66123
H. kuda	184570	5.66123
H. kuda	201047	5.66123
H. kuda	218980	5.66123
H. mohnikei	10103.6	114.462
H. mohnikei	12498.6	34.5268
H. mohnikei	15035.8	34.5268
H. mohnikei	17723.9	22.1793
H. mohnikei	20571.4	22.1793
H. mohnikei	23588.6	18.8776
H. mohnikei	26785.1	18.8776
H. mohnikei	30171.2	16.0463
H. mohnikei	33758.9	16.0463
H. mohnikei	37559.8	13.2659
H. mohnikei	41586.6	13.2659
H. mohnikei	45852.7	11.1304
H. mohnikei	50372.4	11.1304
H. mohnikei	55160.5	9.51645
H. mohnikei	60233.3	9.51645
H. mohnikei	65607.7	8.1975
H. mohnikei	71301.5	8.1975
H. mohnikei	77333.8	7.10107
H. mohnikei	83724.7	7.10107
H. mohnikei	90495.4	6.20701
H. mohnikei	97668.5	6.20701
H. mohnikei	105268	5.48967
H. mohnikei	113319	5.48967
H. mohnikei	121848	4.91866
H. mohnikei	130885	4.91866
H. mohnikei	140458	4.46738
H. mohnikei	150601	4.46738
H. mohnikei	161347	4.11509
H. mohnikei	172731	4.11509
H. mohnikei	184792	3.84536
H. mohnikei	197569	3.84536
H. mohnikei	211106	3.64439
H. mohnikei	225448	3.64439
H. mohnikei	240642	3.49935
H. mohnikei	256739	3.49935
H. mohnikei	273793	3.39801
H. mohnikei	291861	3.39801
H. mohnikei	311002	3.32925
H. mohnikei	331281	3.32925
H. mohnikei	352765	3.28335
H. mohnikei	375526	3.28335
H. mohnikei	399641	3.25236
H. mohnikei	425188	3.25236
H. mohnikei	452254	3.23104
H. mohnikei	480928	3.23104
H. mohnikei	511307	3.21737
H. mohnikei	543491	3.21737
H. mohnikei	577589	3.21048
H. mohnikei	613713	3.21048
H. mohnikei	651984	3.20583
H. mohnikei	692529	3.20583
H. mohnikei	735485	3.20583
H. mohnikei	780993	3.20583
H. reidi	10016.8	1.98593
H. reidi	11401	2.25011
H. reidi	12918.7	2.25011
H. reidi	14582.8	2.89937
H. reidi	16407.3	2.89937
H. reidi	18407.7	3.86067
H. reidi	20601.1	3.86067
H. reidi	23006.1	4.97179
H. reidi	25642.9	4.97179
H. reidi	28534	5.97249
H. reidi	31703.9	5.97249
H. reidi	35179.5	6.66228
H. reidi	38990.3	6.66228
H. reidi	43168.5	6.98749
H. reidi	47749.7	6.98749
H. reidi	52772.7	7.00661
H. reidi	58280.1	7.00661
H. reidi	64318.5	6.80807
H. reidi	70939.4	6.80807
H. reidi	78198.6	6.47611
H. reidi	86157.9	6.47611
H. reidi	94884.8	6.10506
H. reidi	104453	6.10506
H. reidi	114944	5.78572
H. reidi	126447	5.78572
H. reidi	139060	5.57693
H. reidi	152888	5.57693
H. reidi	168050	5.50008
H. reidi	184674	5.50008
H. reidi	202901	5.55245
H. reidi	222886	5.55245
H. reidi	244799	5.72237
H. reidi	268824	5.72237
H. reidi	295166	5.99203
H. reidi	324049	5.99203
H. reidi	355717	6.3291
H. reidi	390439	6.3291
H. reidi	428509	6.68882
H. reidi	470250	6.68882
H. reidi	516017	7.03127
H. reidi	566197	7.03127
H. reidi	621217	7.3851
H. reidi	681542	7.3851
H. reidi	747685	7.3851
H. reidi	820206	7.3851
H. subelongatus	11250.8	4.87306
H. subelongatus	13632.6	4.87306
H. subelongatus	16188	5.94512
H. subelongatus	18929.6	5.94512
H. subelongatus	21871.5	7.19779
H. subelongatus	25027.6	7.19779
H. subelongatus	28414.1	8.97645
H. subelongatus	32047.5	8.97645
H. subelongatus	35945.7	11.2992
H. subelongatus	40128.4	11.2992
H. subelongatus	44616	13.6745
H. subelongatus	49431	13.6745
H. subelongatus	54596.8	15.4317
H. subelongatus	60139.7	15.4317
H. subelongatus	66086.5	16.1235
H. subelongatus	72467.1	16.1235
H. subelongatus	79313.1	15.7005
H. subelongatus	86658.2	15.7005
H. subelongatus	94539	14.4265
H. subelongatus	102995	14.4265
H. subelongatus	112067	12.7003
H. subelongatus	121800	12.7003
H. subelongatus	132244	10.9069
H. subelongatus	143449	10.9069
H. subelongatus	155471	9.30459
H. subelongatus	168370	9.30459
H. subelongatus	182210	8.00323
H. subelongatus	197059	8.00323
H. subelongatus	212990	7.01601
H. subelongatus	230084	7.01601
H. subelongatus	248424	6.3142
H. subelongatus	268102	6.3142
H. subelongatus	289214	5.85195
H. subelongatus	311866	5.85195
H. subelongatus	336170	5.57637
H. subelongatus	362247	5.57637
H. subelongatus	390225	5.43522
H. subelongatus	420243	5.43522
H. subelongatus	452450	5.38283
H. subelongatus	487006	5.38283
H. subelongatus	524083	5.38164
H. subelongatus	563862	5.38164
H. subelongatus	606543	5.40166
H. subelongatus	652337	5.40166
H. subelongatus	701470	5.42091
H. subelongatus	754185	5.42091
H. subelongatus	810745	5.42597
H. subelongatus	871430	5.42597
H. subelongatus	936540	5.40073
H. subelongatus	1.0064e+06	5.40073
H. subelongatus	1.08135e+06	5.40073
H. subelongatus	1.16177e+06	5.40073
H. spinosissimus	10067.6	7.3264
H. spinosissimus	11787.5	7.3264
H. spinosissimus	13636.7	5.82781
H. spinosissimus	15624.9	5.82781
H. spinosissimus	17762.6	5.82816
H. spinosissimus	20061	5.82816
H. spinosissimus	22532.1	6.24912
H. spinosissimus	25189	6.24912
H. spinosissimus	28045.6	6.76132
H. spinosissimus	31117	6.76132
H. spinosissimus	34419.1	7.07401
H. spinosissimus	37969.5	7.07401
H. spinosissimus	41786.9	7.0028
H. spinosissimus	45891.2	7.0028
H. spinosissimus	50304	6.58702
H. spinosissimus	55048.5	6.58702
H. spinosissimus	60149.7	6.00204
H. spinosissimus	65634.2	6.00204
H. spinosissimus	71531.1	5.40145
H. spinosissimus	77871.3	5.40145
H. spinosissimus	84688	4.86331
H. spinosissimus	92017.2	4.86331
H. spinosissimus	99897.2	4.41227
H. spinosissimus	108370	4.41227
H. spinosissimus	117479	4.05006
H. spinosissimus	127273	4.05006
H. spinosissimus	137803	3.77422
H. spinosissimus	149125	3.77422
H. spinosissimus	161298	3.58682
H. spinosissimus	174386	3.58682
H. spinosissimus	188458	3.49447
H. spinosissimus	203587	3.49447
H. spinosissimus	219854	3.50444
H. spinosissimus	237344	3.50444
H. spinosissimus	256148	3.62478
H. spinosissimus	276366	3.62478
H. spinosissimus	298104	3.87214
H. spinosissimus	321475	3.87214
H. spinosissimus	346604	4.28387
H. spinosissimus	373621	4.28387
H. spinosissimus	402670	4.92347
H. spinosissimus	433902	4.92347
H. spinosissimus	467481	5.84701
H. spinosissimus	503585	5.84701
H. spinosissimus	542403	6.9834
H. spinosissimus	584138	6.9834
H. spinosissimus	629011	8.17318
H. spinosissimus	677257	8.17318
H. spinosissimus	729130	8.17318
H. spinosissimus	784902	8.17318
H. trimaculatus	11256	2.73114
H. trimaculatus	12837.8	2.73114
H. trimaculatus	14525.9	3.34527
H. trimaculatus	16327.3	3.34527
H. trimaculatus	18249.6	3.83406
H. trimaculatus	20301.2	3.83406
H. trimaculatus	22490.5	4.333
H. trimaculatus	24827	4.333
H. trimaculatus	27320.4	4.82341
H. trimaculatus	29981.3	4.82341
H. trimaculatus	32821	5.06566
H. trimaculatus	35851.3	5.06566
H. trimaculatus	39085.2	4.9455
H. trimaculatus	42536.5	4.9455
H. trimaculatus	46219.6	4.50558
H. trimaculatus	50150	4.50558
H. trimaculatus	54344.5	3.90123
H. trimaculatus	58820.8	3.90123
H. trimaculatus	63597.7	3.29961
H. trimaculatus	68695.6	3.29961
H. trimaculatus	74135.8	2.79856
H. trimaculatus	79941.6	2.79856
H. trimaculatus	86137.3	2.42749
H. trimaculatus	92749.3	2.42749
H. trimaculatus	99805.5	2.1793
H. trimaculatus	107336	2.1793
H. trimaculatus	115372	2.03418
H. trimaculatus	123947	2.03418
H. trimaculatus	133099	1.97304
H. trimaculatus	142866	1.97304
H. trimaculatus	153289	1.98283
H. trimaculatus	164412	1.98283
H. trimaculatus	176282	2.05743
H. trimaculatus	188949	2.05743
H. trimaculatus	202468	2.20044
H. trimaculatus	216894	2.20044
H. trimaculatus	232290	2.43012
H. trimaculatus	248720	2.43012
H. trimaculatus	266254	2.7865
H. trimaculatus	284965	2.7865
H. trimaculatus	304933	3.36609
H. trimaculatus	326243	3.36609
H. trimaculatus	348984	4.40971
H. trimaculatus	373253	4.40971
H. trimaculatus	399153	7.35671
H. trimaculatus	426792	7.35671
H. trimaculatus	456287	7.35671
H. trimaculatus	487765	7.35671
H. zosterae	12010.5	35.5203
H. zosterae	15002.4	15.4321
H. zosterae	18227.2	15.4321
H. zosterae	21703.4	9.64609
H. zosterae	25450.5	9.64609
H. zosterae	29489.6	8.47504
H. zosterae	33843.4	8.47504
H. zosterae	38536.7	9.15963
H. zosterae	43595.6	9.15963
H. zosterae	49048.9	10.3635
H. zosterae	54927.2	10.3635
H. zosterae	61263.3	11.5705
H. zosterae	68093.3	11.5705
H. zosterae	75455.9	12.8302
H. zosterae	83391.9	12.8302
H. zosterae	91946.6	14.1629
H. zosterae	101168	14.1629
H. zosterae	111108	15.5192
H. zosterae	121822	15.5192
H. zosterae	133372	16.5817
H. zosterae	145821	16.5817
H. zosterae	159241	17.1417
H. zosterae	173707	17.1417
H. zosterae	189300	17.0551
H. zosterae	206108	17.0551
H. zosterae	224226	16.238
H. zosterae	243756	16.238
H. zosterae	264808	14.8488
H. zosterae	287500	14.8488
H. zosterae	311961	13.2125
H. zosterae	338329	13.2125
H. zosterae	366751	11.6181
H. zosterae	397388	11.6181
H. zosterae	430413	10.2489
H. zosterae	466011	10.2489
H. zosterae	504384	9.20024
H. zosterae	545747	9.20024
H. zosterae	590334	8.49239
H. zosterae	638395	8.49239
H. zosterae	690202	8.08515
H. zosterae	746046	8.08515
H. zosterae	806243	7.9108
H. zosterae	871130	7.9108
H. zosterae	941074	7.90181
H. zosterae	1.01647e+06	7.90181
H. zosterae	1.09774e+06	7.99614
H. zosterae	1.18534e+06	7.99614
H. zosterae	1.27978e+06	8.13862
H. zosterae	1.38157e+06	8.13862
H. zosterae	1.49129e+06	8.32805
H. zosterae	1.60956e+06	8.32805
H. zosterae	1.73706e+06	8.32805
H. zosterae	1.87448e+06	8.32805

## Sheet: Fig.4a
>H.abdominalis
MAFLVPLALLAWTCCARLGYCALLPAEGDFTRAVVERRQPVAASPIAPVVVAGSQGGLPQDTVTEHMHMLYDKYNKAGFPFKDGNTVRSFKAHWGVINKKQLQIFNLTSLTKSEDVLSAALHYYIGDLRNGSGSCTRPQGRVLHGPRRRSHIQAVIWSFAPEADRMRTLGQFRINVSTHYRDFISWQWKDITRVVNQAKAHQQLLIGIEVASGGPRPWKELLADRSPYILVYANDSAISEPESVVATLRRNPPSAGDPKAGQRERNGTEPQRSSSRSKRSVNVPLPLQNNELPGPEYPYETTGWDESSPYEPFRSKQARRPLRKKSRKNPRHKMPLLQFDEHTIKKARKKQWNEPRNCARRYLKVDFADIGWSEWIISPKSFDAYYCAGSCQFPMPKAL…
>H.algiricus
MAFLVPLALLAWTCCARLGYCALLPAEGDFTRAVVERRQPVAASPIAPVVVAGSQGGLPQDTVTEHMHMLYDKYNKAGFPFKDGNTVRSFKAHWGVINKKQLQIFNLTSLTKSEDVLSAALHYYIGDLRNGSGSCTRPQGRVLHGPRRRSHIQAVIWSFAPEADRMRTLGQFRINVSTHYRDFISWQWKDITRVVNQAKAHQQLLIGIEVASGGPRPWKELLADRSPYILVYANDSAISEPESVVATLRRNPPSAGDPKAGQRERNGTEPQRSSSRSKRSVNVPLPLQNNELPGPEYPYETTGWDESSPYEPFRSKQARRPLRKKSRKNPRHKMPLLQFDEHTIKKARKKQWNEPRNCARRYLKVDFADIGWSEWIISPKSFDAYYCAGSCQFPMPKAL…
> H.barbouri
MAFLVPLALLAWTCCARLGYCALLPAEGDFTRAVVERRQPVAASPIAPVVVAGSQGGLPQDTVTEHMHMLYDKYNKAGFPFKDGNTVRSFKAHWGVINKKQLQIFNLTSLTKSEDVLSAALHYYIGDLRNGSGSCTRPQGRVLHGPRRRSHIQAVIWSFAPEADRMRTLGQFRINVSTHYRDFISWQWKDITRVVNQAKAHQQLLIGIEVASGGPRPWKELLADRSPYILVYANDSAISEPESVVATLRRNPPSAGDPKAGQRERNGTEPQRSSSRSKRSVNVPLPLQNNELPGPEYPYETTGWDESSPYEPFRSKQARRPLRKKSRKNPRHKMPLLQFDEHTIKKARKKQWNEPRNCARRYLKVDFADIGWSEWIISPKSFDAYYCAGSCQFPMPKAL…
>H.casscsio
MAFLVPLALLAWTCCARLGYCALLPAEGDFTRAVVERRQPVAASPIAPVVVAGSQGGLPQDTVTEHMHMLYDKYNKAGFPFKDGNTVRSFKAHWGVINKKQLQIFNLTSLTKSEDVLSAALHYYIGDLRNGSGSCTRPQGRVLHGPRRRSHIQAVIWSFAPEADRMRTLGQFRINVSTHYRDFISWQWKDITRVVNQAKAHQQLLIGIEVASGGPRPWKELLADRSPYILVYANDSAISEPESVVATLRRNPPSAGDPKAGQRERNGTEPQRSSSRSKRSVNVPLPLQNNELPGPEYPYETTGWDESSPYEPFRSKQARRPLRKKSRKNPRHKMPLLQFDEHTIKKARKKQWNEPRNCARRYLKVDFADIGWSEWIISPKSFDAYYCAGSCQFPMPKAL…
>H.comes
MAFLVPLALLAWTCCARLGYCALLPAEGDFTRAVVERRQPVAASPIAPVVVAGSQGGLPQDTVTEHMHMLYDKYNKAGFPFKDGNTVRSFKAHWGVINKKQLQIFNLTSLTKSEDVLSAALHYYIGDLRNGSGSCTRPQGRVLHGPRRRSHIQAVIWSFAPEADRMRTLGQFRINVSTHYRDFISWQWKDITRVVNQAKAHQQLLIGIEVASGGPRPWKELLADRSPYILVYANDSAISEPESVVATLRRNPPSAGDPKAGQRERNGTEPQRSSSRSKRSVNVPLPLQNNELPGPEYPYETTGWDESSPYEPFRSKQARRPLRKKSRKNPRHKMPLLQFDEHTIKKARKKQWNEPRNCARRYLKVDFADIGWSEWIISPKSFDAYYCAGSCQFPMPKAL…
>H.capensis
MAFLVPLALLAWTCCARLGYCALLPAEGDFTRAVVERRQPVAASPIAPVVVAGSQGGLPQDTVTEHMHMLYDKYNKAGFPFKDGNTVRSFKAHWGVINKKQLQIFNLTSLTKSEDVLSAALHYYIGDLRNGSGSCTRPQGRVLHGPRRRSHIQAVIWSFAPEADRMRTLGQFRINVSTHYRDFISWQWKDITRVVNQAKAHQQLLIGIEVASGGPRPWKELLADRSPYILVYANDSAISEPESVVATLRRNPPSAGDPKAGQRERNGTEPQRSSSRSKRSVNVPLPLQNNELPGPEYPYETTGWDESSPYEPFRSKQARRPLRKKSRKNPRHKMPLLQFDEHTIKKARKKQWNEPRNCARRYLKVDFADIGWSEWIISPKSFDAYYCAGSCQFPMPKAL…
>H.erectus
MAFLVPLALLAWTCCARLGYCALLPAEGDFTRAVVERRQPVAASPIAPVVVAGSQGGLPQDTVTEHMHMLYDKYNKAGFPFKDGNTVRSFKAHWGVINKKQLQIFNLTSLTKSEDVLSAALHYYIGDLRNGSGSCTRPQGRVLHGPRRRSHIQAVIWSFAPEADRMRTLGQFRINVSTHYRDFISWQWKDITRVVNQAKAHQQLLIGIEVASGGPRPWKELLADRSPYILVYANDSAISEPESVVATLRRNPPSAGDPKAGQRERNGTEPQRSSSRSKRSVNVPLPLQNNELPGPEYPYETTGWDESSPYEPFRSKQARRPLRKKSRKNPRHKMPLLQFDEHTIKKARKKQWNEPRNCARRYLKVDFADIGWSEWIISPKSFDAYYCAGSCQFPMPKAL…
>H.fuscus
MAFLVPLALLAWTCCARLGYCALLPAEGDFTRAVVERRQPVAASPIAPVVVAGSQGGLPQDTVTEHMHMLYDKYNKAGFPFKDGNTVRSFKAHWGVINKKQLQIFNLTSLTKSEDVLSAALHYYIGDLRNGSGSCTRPQGRVLHGPRRRSHIQAVIWSFAPEADRMRTLGQFRINVSTHYRDFISWQWKDITRVVNQAKAHQQLLIGIEVASGGPRPWKELLADRSPYILVYANDSAISEPESVVATLRRNPPSAGDPKAGQRERNGTEPQRSSSRSKRSVNVPLPLQNNELPGPEYPYETTGWDESSPYEPFRSKQARRPLRKKSRKNPRHKMPLLQFDEHTIKKARKKQWNEPRNCARRYLKVDFADIGWSEWIISPKSFDAYYCAGSCQFPMPKAL…
>H.hippocampus
MAFLVPLALLAWTCCARLGYCALLPAEGDFTRAVVERRQPVAASPIAPVVVAGSQGGLPQDTVTEHMHMLYDKYNKAGFPFKDGNTVRSFKAHWGVINKKQLQIFNLTSLTKSEDVLSAALHYYIGDLRNGSGSCTRPQGRVLHGPRRRSHIQAVIWSFAPEADRMRTLGQFRINVSTHYRDFISWQWKDITRVVNQAKAHQQLLIGIEVASGGPRPWKELLADRSPYILVYANDSAISEPESVVATLRRNPPSAGDPKAGQRERNGTEPQRSSSRSKRSVNVPLPLQNNELPGPEYPYETTGWDESSPYEPFRSKQARRPLRKKSRKNPRHKMPLLQFDEHTIKKARKKQWNEPRNCARRYLKVDFADIGWSEWIISPKSFDAYYCAGSCQFPMPKAL…
>H.histrix
MAFLVPLALLAWTCCARLGYCALLPAEGDFTRAVVERRQPVAASPIAPVVVAGSQGGLPQDTVTEHMHMLYDKYNKAGFPFKDGNTVRSFKAHWGVINKKQLQIFNLTSLTKSEDVLSAALHYYIGDLRNGSGSCTRPQGRVLHGPRRRSHIQAVIWSFAPEADRMRTLGQFRINVSTHYRDFISWQWKDITRVVNQAKAHQQLLIGIEVASGGPRPWKELLADRSPYILVYANDSAISEPESVVATLRRNPPSAGDPKAGQRERNGTEPQRSSSRSKRSVNVPLPLQNNELPGPEYPYETTGWDESSPYEPFRSKQARRPLRKKSRKNPRHKMPLLQFDEHTIKKARKKQWNEPRNCARRYLKVDFADIGWSEWIISPKSFDAYYCAGSCQFPMPKAL…
>H.ingens
MAFLVPLALLAWTCCARLGYCALLPAEGDFTRAVVERRQPVAASPIAPVVVAGSQGGLPQDTVTEHMHMLYDKYNKAGFPFKDGNTVRSFKAHWGVINKKQLQIFNLTSLTKSEDVLSAALHYYIGDLRNGSGSCTRPQGRVLHGPRRRSHIQAVIWSFAPEADRMRTLGQFRINVSTHYRDFISWQWKDITRVVNQAKAHQQLLIGIEVASGGPRPWKELLADRSPYILVYANDSAISEPESVVATLRRNPPSAGDPKAGQRERNGTEPQRSSSRSKRSVNVPLPLQNNELPGPEYPYETTGWDESSPYEPFRSKQARRPLRKKSRKNPRHKMPLLQFDEHTIKKARKKQWNEPRNCARRYLKVDFADIGWSEWIISPKSFDAYYCAGSCQFPMPKAL…
>H.jayakari
MAFLVPLALLAWTCCARLGYCALLPAEGDFTRAVVERRQPVAASPIAPVVVAGSQGGLPQDTVTEHMHMLYDKYNKAGFPFKDGNTVRSFKAHWGVINKKQLQIFNLTSLTKSEDVLSAALHYYIGDLRNGSGSCTRPQGRVLHGPRRRSHIQAVIWSFAPEADRMRTLGQFRINVSTHYRDFISWQWKDITRVVNQAKAHQQLLIGIEVASGGPRPWKELLADRSPYILVYANDSAISEPESVVATLRRNPPSAGDPKAGQRERNGTEPQRSSSRSKRSVNVPLPLQNNELPGPEYPYETTGWDESSPYEPFRSKQARRPLRKKSRKNPRHKMPLLQFDEHTIKKARKKQWNEPRNCARRYLKVDFADIGWSEWIISPKSFDAYYCAGSCQFPMPKAL…
>H.kelloggi
MAFLVPLALLAWTCCARLGYCALLPAEGDFTRAVVERRQPVAASPIAPVVVAGSQGGLPQDTVTEHMHMLYDKYNKAGFPFKDGNTVRSFKAHWGVINKKQLQIFNLTSLTKSEDVLSAALHYYIGDLRNGSGSCTRPQGRVLHGPRRRSHIQAVIWSFAPEADRMRTLGQFRINVSTHYRDFISWQWKDITRVVNQAKAHQQLLIGIEVASGGPRPWKELLADRSPYILVYANDSAISEPESVVATLRRNPPSAGDPKAGQRERNGTEPQRSSSRSKRSVNVPLPLQNNELPGPEYPYETTGWDESSPYEPFRSKQARRPLRKKSRKNPRHKMPLLQFDEHTIKKARKKQWNEPRNCARRYLKVDFADIGWSEWIISPKSFDAYYCAGSCQFPMPKAL…
>H.kuda
MAFLVPLALLAWTCCARLGYCALLPAEGDFTRAVVERRQPVAASPIAPVVVAGSQGGLPQDTVTEHMHMLYDKYNKAGFPFKDGNTVRSFKAHWGVINKKQLQIFNLTSLTKSEDVLSAALHYYIGDLRNGSGSCTRPQGRVLHGPRRRSHIQAVIWSFAPEADRMRTLGQFRINVSTHYRDFISWQWKDITRVVNQAKAHQQLLIGIEVASGGPRPWKELLADRSPYILVYANDSAISEPESVVATLRRNPPSAGDPKAGQRERNGTEPQRSSSRSKRSVNVPLPLQNNELPGPEYPYETTGWDESSPYEPFRSKQARRPLRKKSRKNPRHKMPLLQFDEHTIKKARKKQWNEPRNCARRYLKVDFADIGWSEWIISPKSFDAYYCAGSCQFPMPKAL…
>H.mohnikei
MAFLVPLALLAWTCCARLGYCALLPAEGDFTRAVVERRQPVAASPIAPVVVAGSQGGLPQDTVTEHMHMLYDKYNKAGFPFKDGNTVRSFKAHWGVINKKQLQIFNLTSLTKSEDVLSAALHYYIGDLRNGSGSCTRPQGRVLHGPRRRSHIQAVIWSFAPEADRMRTLGQFRINVSTHYRDFISWQWKDITRVVNQAKAHQQLLIGIEVASGGPRPWKELLADRSPYILVYANDSAISEPESVVATLRRNPPSAGDPKAGQRERNGTEPQRSSSRSKRSVNVPLPLQNNELPGPEYPYETTGWDESSPYEPFRSKQARRPLRKKSRKNPRHKMPLLQFDEHTIKKARKKQWNEPRNCARRYLKVDFADIGWSEWIISPKSFDAYYCAGSCQFPMPKAL…
>H.reidi
MAFLVPLALLAWTCCARLGYCALLPAEGDFTRAVVERRQPVAASPIAPVVVAGSQGGLPQDTVTEHMHMLYDKYNKAGFPFKDGNTVRSFKAHWGVINKKQLQIFNLTSLTKSEDVLSAALHYYIGDLRNGSGSCTRPQGRVLHGPRRRSHIQAVIWSFAPEADRMRTLGQFRINVSTHYRDFISWQWKDITRVVNQAKAHQQLLIGIEVASGGPRPWKELLADRSPYILVYANDSAISEPESVVATLRRNPPSAGDPKAGQRERNGTEPQRSSSRSKRSVNVPLPLQNNELPGPEYPYETTGWDESSPYEPFRSKQARRPLRKKSRKNPRHKMPLLQFDEHTIKKARKKQWNEPRNCARRYLKVDFADIGWSEWIISPKSFDAYYCAGSCQFPMPKAL…
>H.subelongatus
MAFLVPLALLAWTCCARLGYCALLPAEGDFTRAVVERRQPVAASPIAPVVVAGSQGGLPQDTVTEHMHMLYDKYNKAGFPFKDGNTVRSFKAHWGVINKKQLQIFNLTSLTKSEDVLSAALHYYIGDLRNGSGSCTRPQGRVLHGPRRRSHIQAVIWSFAPEADRMRTLGQFRINVSTHYRDFISWQWKDITRVVNQAKAHQQLLIGIEVASGGPRPWKELLADRSPYILVYANDSAISEPESVVATLRRNPPSAGDPKAGQRERNGTEPQRSSSRSKRSVNVPLPLQNNELPGPEYPYETTGWDESSPYEPFRSKQARRPLRKKSRKNPRHKMPLLQFDEHTIKKARKKQWNEPRNCARRYLKVDFADIGWSEWIISPKSFDAYYCAGSCQFPMPKAL…
>H.spinosissimus
MAFLVPLALLAWTCCARLGYCALLPAEGDFTRAVVERRQPVAASPIAPVVVAGSQGGLPQDTVTEHMHMLYDKYNKAGFPFKDGNTVRSFKAHWGVINKKQLQIFNLTSLTKSEDVLSAALHYYIGDLRNGSGSCTRPQGRVLHGPRRRSHIQAVIWSFAPEADRMRTLGQFRINVSTHYRDFISWQWKDITRVVNQAKAHQQLLIGIEVASGGPRPWKELLADRSPYILVYANDSAISEPESVVATLRRNPPSAGDPKAGQRERNGTEPQRSSSRSKRSVNVPLPLQNNELPGPEYPYETTGWDESSPYEPFRSKQARRPLRKKSRKNPRHKMPLLQFDEHTIKKARKKQWNEPRNCARRYLKVDFADIGWSEWIISPKSFDAYYCAGSCQFPMPKAL…
>H.trimaculatus
MAFLVPLALLAWTCCARLGYCALLPAEGDFTRAVVERRQPVAASPIAPVVVAGSQGGLPQDTVTEHMHMLYDKYNKAGFPFKDGNTVRSFKAHWGVINKKQLQIFNLTSLTKSEDVLSAALHYYIGDLRNGSGSCTRPQGRVLHGPRRRSHIQAVIWSFAPEADRMRTLGQFRINVSTHYRDFISWQWKDITRVVNQAKAHQQLLIGIEVASGGPRPWKELLADRSPYILVYANDSAISEPESVVATLRRNPPSAGDPKAGQRERNGTEPQRSSSRSKRSVNVPLPLQNNELPGPEYPYETTGWDESSPYEPFRSKQARRPLRKKSRKNPRHKMPLLQFDEHTIKKARKKQWNEPRNCARRYLKVDFADIGWSEWIISPKSFDAYYCAGSCQFPMPKAL…
>H.zosterae
MAFLVPLALLAWTCCARLGYCALLPAEGDFTRAVVERRQPVAASPIAPVVVAGSQGGLPQDTVTEHMHMLYDKYNKAGFPFKDGNTVRSFKAHWGVINKKQLQIFNLTSLTKSEDVLSAALHYYIGDLRNGSGSCTRPQGRVLHGPRRRSHIQAVIWSFAPEADRMRTLGQFRINVSTHYRDFISWQWKDITRVVNQAKAHQQLLIGIEVASGGPRPWKELLADRSPYILVYANDSAISEPESVVATLRRNPPSAGDPKAGQRERNGTEPQRSSSRSKRSVNVPLPLQNNELPGPEYPYETTGWDESSPYEPFRSKQARRPLRKKSRKNPRHKMPLLQFDEHTIKKARKKQWNEPRNCARRYLKVDFADIGWSEWIISPKSFDAYYCAGSCQFPMPKAL…

## Sheet: Fig.4b
dN/dS values of bmp3 in spiny seahorses	dN/dS values of bmp3 in non-spiny seahorses/branches
0.3478	0.206
0.7408	0.088
1	0.0001
0.7875	0.1755
	0.0001
	0.0001
	0.0001
	0.0001
	0.0001
	0.1164
	0.0001
	0.0878
	0.0001
	0.0001
	0.0575
	0.0001
	0.0874
	0.0001
	0.0001
	0.0568
	0.0001
	0.0001
	0.2889
	0.0001
	0.0001
	0.0001
	0.0001
	0.0339
	0.1856
	0.0001
	0.0001

## Sheet: Fig.4c
(Htl_13:0.00448463712891914064,((((((Hbb_5:0.00297386805996177313,Hsl_12:0.00073828703873044031)100:0.00300525219170031787,Hcm_17:0.00221553097651037848)92:0.00298701585043371562,(Hku_18:0.00222860279437753217,((Hig_14:0.00147897521245876087,(Hcp_S14:0.00000100000050002909,(Hfc_48:0.00073485100653312714,Hcc_7:0.00073914516108599716)85:0.00222466416780978549)45:0.00147799113533588714)27:0.00000100…
Full names for the abbreviation are as follows: H. abdominalis (Had), H. algiricus (Hag), H. barbouri (Hbb), H. casscsio (Hcc), H. camelopardalis (Hcd), H. comes (Hcm), H. capensis (Hcp), H. erectus (Het), H. fuscus (Hfc), H. hippocampus (Hhc), H. histrix (Hht), H. ingens (Hig), H. jayakari (Hjk), H. kelloggi (Hkg), H. kuda (Hku), H. mohnikei (Hmh), H. reidi (Hrd), H. subelongatus (Hsl), H. spino…

## Sheet: Fig.S4c
Chromosome	start	end	GC Content		Chromosome	start	end	Gene density		Chromosome	start	end	TE Density		Chromosome	Gene Start	Gene end	P value of positive selection of spiny trait
Chr1	1	20000	0.4531		Chr1	1	200000	5.5e-05		Chr1	1	200001	0.002085		Chr1	38116	45965	0.996432
Chr1	20001	40000	0.4457		Chr1	200001	400000	7.5e-05		Chr1	200001	400001	0.00209		Chr1	51381	60909	0.98361
Chr1	40001	60000	0.444		Chr1	400001	600000	1.5e-05		Chr1	400001	600001	0.00274		Chr1	70549	74160	0.0948999
Chr1	60001	80000	0.4413		Chr1	600001	800000	1.5e-05		Chr1	600001	800001	0.002945		Chr1	97411	100387	0.00516383
Chr1	80001	100000	0.4395		Chr1	800001	1000000	2.5e-05		Chr1	800001	1000001	0.00301		Chr1	103342	116922	0.859271
Chr1	100001	120000	0.435		Chr1	1000001	1200000	2.5e-05		Chr1	1000001	1200001	0.002545		Chr1	143972	149312	0.976496
Chr1	120001	140000	0.4319		Chr1	1200001	1400000	1e-05		Chr1	1200001	1400001	0.002865		Chr1	165406	177157	0.964169
Chr1	140001	160000	0.4292		Chr1	1400001	1600000	3e-05		Chr1	1400001	1600001	0.00324		Chr1	178971	183247	0.395935
Chr1	160001	180000	0.4328		Chr1	1600001	1800000	1.5e-05		Chr1	1600001	1800001	0.00285		Chr1	188642	189781	0.993044
Chr1	180001	200000	0.4295		Chr1	1800001	2000000	5e-05		Chr1	1800001	2000001	0.003245		Chr1	191523	196978	0.181105
Chr1	200001	220000	0.4289		Chr1	2000001	2200000	3e-05		Chr1	2000001	2200001	0.002905		Chr1	197959	200528	0.0941753
Chr1	220001	240000	0.4287		Chr1	2200001	2400000	5e-06		Chr1	2200001	2400001	0.002935		Chr1	200770	202250	0.309412
Chr1	240001	260000	0.4296		Chr1	2400001	2600000	3.5e-05		Chr1	2400001	2600001	0.00282		Chr1	202964	207602	0.962067
Chr1	260001	280000	0.4355		Chr1	2600001	2800000	1e-05		Chr1	2600001	2800001	0.00241		Chr1	210586	213833	0.966746
Chr1	280001	300000	0.4325		Chr1	2800001	3000000	4e-05		Chr1	2800001	3000001	0.002845		Chr1	213835	235977	0.943549
Chr1	300001	320000	0.4374		Chr1	3000001	3200000	8e-05		Chr1	3000001	3200001	0.001985		Chr1	236285	241516	1
Chr1	320001	340000	0.4398		Chr1	3200001	3400000	7e-05		Chr1	3200001	3400001	0.00254		Chr1	254129	263465	0.910611
Chr1	340001	360000	0.4437		Chr1	3400001	3600000	3e-05		Chr1	3400001	3600001	0.002465		Chr1	264400	269715	1
Chr1	360001	380000	0.4412		Chr1	3600001	3800000	1e-05		Chr1	3600001	3800001	0.00235		Chr1	272385	273809	0.970174
Chr1	380001	400000	0.4412		Chr1	3800001	4000000	3e-05		Chr1	3800001	4000001	0.002045		Chr1	275249	300707	0.994137
Chr1	400001	420000	0.4411		Chr1	4000001	4200000	4e-05		Chr1	4000001	4200001	0.00211		Chr1	302125	313191	0.989296
Chr1	420001	440000	0.4429		Chr1	4200001	4400000	4e-05		Chr1	4200001	4400001	0.00251		Chr1	314516	318314	0.970345
Chr1	440001	460000	0.4431		Chr1	4400001	4600000	4.5e-05		Chr1	4400001	4600001	0.00269		Chr1	318948	351472	0.816716
Chr1	460001	480000	0.4403		Chr1	4600001	4800000	2.5e-05		Chr1	4600001	4800001	0.00254		Chr1	356130	363275	0.955285
Chr1	480001	500000	0.4408		Chr1	4800001	5000000	1e-05		Chr1	4800001	5000001	0.003125		Chr1	368141	387641	1
Chr1	500001	520000	0.4394		Chr1	5000001	5200000	1e-05		Chr1	5000001	5200001	0.00268		Chr1	392304	399090	0.889356
Chr1	520001	540000	0.4379		Chr1	5200001	5400000	4e-05		Chr1	5200001	5400001	0.00245		Chr1	403199	420157	0.272406
Chr1	540001	560000	0.4366		Chr1	5400001	5600000	1.5e-05		Chr1	5400001	5600001	0.00228		Chr1	504298	569736	0.408216
Chr1	560001	580000	0.4377		Chr1	5600001	5800000	7.5e-05		Chr1	5600001	5800001	0.00261		Chr1	584541	586383	0.309019
Chr1	580001	600000	0.4377		Chr1	5800001	6000000	4e-05		Chr1	5800001	6000001	0.002775		Chr1	630264	675456	0.106079
Chr1	600001	620000	0.4382		Chr1	6000001	6200000	1e-05		Chr1	6000001	6200001	0.0025		Chr1	680473	706979	0.291481
Chr1	620001	640000	0.4379		Chr1	6200001	6400000	1e-05		Chr1	6200001	6400001	0.00214		Chr1	717727	886644	0.882535
Chr1	640001	660000	0.4386		Chr1	6400001	6600000	6e-05		Chr1	6400001	6600001	0.00215		Chr1	908247	916037	0.346374
Chr1	660001	680000	0.4388		Chr1	6600001	6800000	2e-05		Chr1	6600001	6800001	0.002605		Chr1	927291	943939	1
Chr1	680001	700000	0.4426		Chr1	6800001	7000000	3.5e-05		Chr1	6800001	7000001	0.00274		Chr1	955847	984026	0.635279
Chr1	700001	720000	0.4417		Chr1	7000001	7200000	5.5e-05		Chr1	7000001	7200001	0.00215		Chr1	987004	995507	0.41595
Chr1	720001	740000	0.4444		Chr1	7200001	7400000	2e-05		Chr1	7200001	7400001	0.002825		Chr1	997181	1014890	0.333418
Chr1	740001	760000	0.4423		Chr1	7400001	7600000	6e-05		Chr1	7400001	7600001	0.00224		Chr1	1017422	1048710	0.791293
Chr1	760001	780000	0.4413		Chr1	7600001	7800000	3e-05		Chr1	7600001	7800001	0.002205		Chr1	1063662	1086491	0.607039
Chr1	780001	800000	0.4443		Chr1	7800001	8000000	2.5e-05		Chr1	7800001	8000001	0.0027		Chr1	1109119	1128517	0.342698
Chr1	800001	820000	0.4417		Chr1	8000001	8200000	3.5e-05		Chr1	8000001	8200001	0.001935		Chr1	1153601	1169950	0.456127
Chr1	820001	840000	0.439		Chr1	8200001	8400000	0		Chr1	8200001	8400001	0.002045		Chr1	1199844	1240957	0.222456
Chr1	840001	860000	0.4381		Chr1	8400001	8600000	3.5e-05		Chr1	8400001	8600001	0.002295		Chr1	1254496	1257033	0.753981
Chr1	860001	880000	0.4405		Chr1	8600001	8800000	1.5e-05		Chr1	8600001	8800001	0.002605		Chr1	1264996	1268770	0.182695
Chr1	880001	900000	0.4439		Chr1	8800001	9000000	3.5e-05		Chr1	8800001	9000001	0.002705		Chr1	1419513	1434269	0.231272
Chr1	900001	920000	0.4452		Chr1	9000001	9200000	3e-05		Chr1	9000001	9200001	0.00238		Chr1	1440754	1477637	0.0180378
Chr1	920001	940000	0.4446		Chr1	9200001	9400000	5.5e-05		Chr1	9200001	9400001	0.0024		Chr1	1487182	1502457	0.161699
Chr1	940001	960000	0.4425		Chr1	9400001	9600000	3e-05		Chr1	9400001	9600001	0.00236		Chr1	1505327	1525356	0.233535
Chr1	960001	980000	0.4443		Chr1	9600001	9800000	1.5e-05		Chr1	9600001	9800001	0.00257		Chr1	1542896	1569193	0.245781
Chr1	980001	1000000	0.4438		Chr1	9800001	10000000	5e-05		Chr1	9800001	10000001	0.00243		Chr1	1583728	1666026	0.77254
Chr1	1000001	1020000	0.4434		Chr1	10000001	10200000	7.5e-05		Chr1	10000001	10200001	0.002235		Chr1	1670162	1670806	0.49233
Chr1	1020001	1040000	0.4453		Chr1	10200001	10400000	5.5e-05		Chr1	10200001	10400001	0.002745		Chr1	1739841	1764326	0.362893
Chr1	1040001	1060000	0.4461		Chr1	10400001	10600000	6e-05		Chr1	10400001	10600001	0.002715		Chr1	1781892	1821317	0.143339
Chr1	1060001	1080000	0.4444		Chr1	10600001	10800000	6.5e-05		Chr1	10600001	10800001	0.002885		Chr1	1823284	1827215	0.906391
Chr1	1080001	1100000	0.4389		Chr1	10800001	11000000	4.5e-05		Chr1	10800001	11000001	0.0027		Chr1	1834156	1843261	0.119171
Chr1	1100001	1120000	0.4398		Chr1	11000001	11200000	2e-05		Chr1	11000001	11200001	0.003325		Chr1	1847606	1857476	0.875604
Chr1	1120001	1140000	0.4377		Chr1	11200001	11400000	4.5e-05		Chr1	11200001	11400001	0.00287		Chr1	1863488	1880599	0.782337
Chr1	1140001	1160000	0.4409		Chr1	11400001	11600000	1.5e-05		Chr1	11400001	11600001	0.003		Chr1	1884858	1892486	0.651353
Chr1	1160001	1180000	0.4392		Chr1	11600001	11800000	2.5e-05		Chr1	11600001	11800001	0.00267		Chr1	1897068	1912560	0.728013
Chr1	1180001	1200000	0.4378		Chr1	11800001	12000000	6.5e-05		Chr1	11800001	12000001	0.00276		Chr1	1915465	1941390	0.692868
Chr1	1200001	1220000	0.4412		Chr1	12000001	12200000	3.5e-05		Chr1	12000001	12200001	0.002735		Chr1	1944645	1953874	0.106058
Chr1	1220001	1240000	0.4403		Chr1	12200001	12400000	5e-05		Chr1	12200001	12400001	0.0029		Chr1	1954156	1960153	0.594379
Chr1	1240001	1260000	0.4403		Chr1	12400001	12600000	6.5e-05		Chr1	12400001	12600001	0.002715		Chr1	1961822	1977453	0.609981
Chr1	1260001	1280000	0.4374		Chr1	12600001	12800000	3.5e-05		Chr1	12600001	12800001	0.002845		Chr1	2022573	2061303	0.338873
Chr1	1280001	1300000	0.4381		Chr1	12800001	13000000	2e-05		Chr1	12800001	13000001	0.002865		Chr1	2061742	2069174	0.284976
Chr1	1300001	1320000	0.4378		Chr1	13000001	13200000	1.5e-05		Chr1	13000001	13200001	0.002905		Chr1	2067784	2071962	0.570317
Chr1	1320001	1340000	0.4409		Chr1	13200001	13400000	5e-06		Chr1	13200001	13400001	0.003255		Chr1	2076269	2112871	0.315864
Chr1	1340001	1360000	0.4556		Chr1	13400001	13600000	5e-06		Chr1	13400001	13600001	0.003065		Chr1	2126388	2134105	0.926594
Chr1	1360001	1380000	0.4566		Chr1	13600001	13800000	1e-05		Chr1	13600001	13800001	0.00271		Chr1	2139498	2245885	0.438435
Chr1	1380001	1400000	0.4578		Chr1	13800001	14000000	5e-06		Chr1	13800001	14000001	0.003135		Chr1	2382940	2402705	0.893959
Chr1	1400001	1420000	0.4563		Chr1	14000001	14200000	5e-06		Chr1	14000001	14200001	0.002795		Chr1	2406832	2408387	0.966919
Chr1	1420001	1440000	0.4561		Chr1	14200001	14400000	4e-05		Chr1	14200001	14400001	0.002795		Chr1	2409215	2418821	0.556221
Chr1	1440001	1460000	0.4556		Chr1	14400001	14600000	2e-05		Chr1	14400001	14600001	0.003025		Chr1	2419249	2438608	0.64315
Chr1	1460001	1480000	0.4582		Chr1	14600001	14800000	3.5e-05		Chr1	14600001	14800001	0.002415		Chr1	2443132	2481065	0.540124
Chr1	1480001	1500000	0.4589		Chr1	14800001	15000000	6e-05		Chr1	14800001	15000001	0.00243		Chr1	2492479	2506054	0.619156
Chr1	1500001	1520000	0.4574		Chr1	15000001	15200000	3.5e-05		Chr1	15000001	15200001	0.002175		Chr1	2506695	2547245	0.874942
Chr1	1520001	1540000	0.4572		Chr1	15200001	15400000	2e-05		Chr1	15200001	15400001	0.001905		Chr1	2564231	2636346	0.145424
Chr1	1540001	1560000	0.4431		Chr1	15400001	15600000	1.5e-05		Chr1	15400001	15600001	0.002395		Chr1	2637074	2659289	0.537042
Chr1	1560001	1580000	0.4445		Chr1	15600001	15800000	6.5e-05		Chr1	15600001	15800001	0.002375		Chr1	2738569	2764356	0.928961
Chr1	1580001	1600000	0.4432		Chr1	15800001	16000000	4.5e-05		Chr1	15800001	16000001	0.001955		Chr1	2769785	2819879	0.955871
Chr1	1600001	1620000	0.4416		Chr1	16000001	16200000	2e-05		Chr1	16000001	16200001	0.002365		Chr1	2874102	2879105	0.354511
Chr1	1620001	1640000	0.4423		Chr1	16200001	16400000	4e-05		Chr1	16200001	16400001	0.002375		Chr1	2882933	2891075	0.490134
Chr1	1640001	1660000	0.4417		Chr1	16400001	16600000	4e-05		Chr1	16400001	16600001	0.002035		Chr1	2891120	2899640	0.0378304
Chr1	1660001	1680000	0.4409		Chr1	16600001	16800000	3.5e-05		Chr1	16600001	16800001	0.002295		Chr1	2899708	2911082	0.445972
Chr1	1680001	1700000	0.4399		Chr1	16800001	17000000	3.5e-05		Chr1	16800001	17000001	0.00313		Chr1	2915356	2982852	0.853996
Chr1	1700001	1720000	0.439		Chr1	17000001	17200000	7.5e-05		Chr1	17000001	17200001	0.001785		Chr1	2983096	2992761	0.243045
Chr1	1720001	1740000	0.4368		Chr1	17200001	17400000	0.00011		Chr1	17200001	17400001	0.002275		Chr1	2996799	2998580	0.962777
Chr1	1740001	1760000	0.4379		Chr1	17400001	17600000	4e-05		Chr1	17400001	17600001	0.002495		Chr1	3004197	3019010	0.995487
Chr1	1760001	1780000	0.4336		Chr1	17600001	17800000	2e-05		Chr1	17600001	17800001	0.001825		Chr1	3022717	3027386	0.813735
Chr1	1780001	1800000	0.4319		Chr1	17800001	18000000	6.5e-05		Chr1	17800001	18000001	0.00199		Chr1	3028470	3037084	0.120999
Chr1	1800001	1820000	0.4337		Chr1	18000001	18200000	7.5e-05		Chr1	18000001	18200001	0.001945		Chr1	3038153	3050079	0.14023
Chr1	1820001	1840000	0.434		Chr1	18200001	18400000	3e-05		Chr1	18200001	18400001	0.002095		Chr1	3052612	3068775	0.861352
Chr1	1840001	1860000	0.4332		Chr1	18400001	18600000	5e-06		Chr1	18400001	18600001	0.00198		Chr1	3068908	3074770	0.394926
Chr1	1860001	1880000	0.4324		Chr1	18600001	18800000	0		Chr1	18600001	18800001	0.001775		Chr1	3076260	3082656	0.0419237
Chr1	1880001	1900000	0.4323		Chr1	18800001	19000000	3.5e-05		Chr1	18800001	19000001	0.00225		Chr1	3083003	3088364	0.370073
Chr1	1900001	1920000	0.4306		Chr1	19000001	19200000	7e-05		Chr1	19000001	19200001	0.00215		Chr1	3090048	3095720	0.398452
Chr1	1920001	1940000	0.4311		Chr1	19200001	19400000	6.5e-05		Chr1	19200001	19400001	0.001895		Chr1	3097586	3132374	0.899231
Chr1	1940001	1960000	0.4304		Chr1	19400001	19600000	0		Chr1	19400001	19600001	0.001975		Chr1	3142625	3146201	0.734409
Chr1	1960001	1980000	0.4361		Chr1	19600001	19800000	5e-05		Chr1	19600001	19800001	0.00226		Chr1	3148047	3173234	0.310808
Chr1	1980001	2000000	0.4377		Chr1	19800001	20000000	5e-06		Chr1	19800001	20000001	0.002135		Chr1	3172515	3175839	0.547208
Chr1	2000001	2020000	0.4368		Chr1	20000001	20200000	2e-05		Chr1	20000001	20200001	0.00247		Chr1	3176230	3180434	0.972597
Chr1	2020001	2040000	0.4367		Chr1	20200001	20400000	5.5e-05		Chr1	20200001	20400001	0.002545		Chr1	3180435	3187115	0.944536
Chr1	2040001	2060000	0.4376		Chr1	20400001	20600000	6e-05		Chr1	20400001	20600001	0.00215		Chr1	3189720	3192800	0.875227
Chr1	2060001	2080000	0.4403		Chr1	20600001	20800000	2e-05		Chr1	20600001	20800001	0.00209		Chr1	3198336	3211405	0.207882
Chr1	2080001	2100000	0.4403		Chr1	20800001	21000000	4.5e-05		Chr1	20800001	21000001	0.0022		Chr1	3212497	3214261	0.00682306
Chr1	2100001	2120000	0.4437		Chr1	21000001	21200000	3e-05		Chr1	21000001	21200001	0.00236		Chr1	3225212	3229070	0.671619
Chr1	2120001	2140000	0.4428		Chr1	21200001	21400000	4.5e-05		Chr1	21200001	21400001	0.002635		Chr1	3229503	3236354	0.117819
Chr1	2140001	2160000	0.4451		Chr1	21400001	21600000	2.5e-05		Chr1	21400001	21600001	0.00228		Chr1	3237765	3251777	0.546106
Chr1	2160001	2180000	0.4417		Chr1	21600001	21800000	1e-05		Chr1	21600001	21800001	0.002525		Chr1	3254580	3271726	0.492233
Chr1	2180001	2200000	0.4406		Chr1	21800001	22000000	7e-05		Chr1	21800001	22000001	0.00221		Chr1	3272723	3306161	0.624034
Chr1	2200001	2220000	0.4405		Chr1	22000001	22200000	4.5e-05		Chr1	22000001	22200001	0.00245		Chr1	3306316	3316443	0.528243
Chr1	2220001	2240000	0.4383		Chr1	22200001	22400000	5e-05		Chr1	22200001	22400001	0.002595		Chr1	3318306	3322077	0.160541
Chr1	2240001	2260000	0.4357		Chr1	22400001	22600000	7.5e-05		Chr1	22400001	22600001	0.00211		Chr1	3322228	3338538	0.281807
Chr1	2260001	2280000	0.4337		Chr1	22600001	22800000	4e-05		Chr1	22600001	22800001	0.002275		Chr1	3340223	3344084	0.890097
Chr1	2280001	2300000	0.4337		Chr1	22800001	23000000	5.5e-05		Chr1	22800001	23000001	0.002885		Chr1	3349089	3360098	0.333342
Chr1	2300001	2320000	0.4317		Chr1	23000001	23200000	7.5e-05		Chr1	23000001	23200001	0.002935		Chr1	3362973	3365845	0.454152
Chr1	2320001	2340000	0.4315		Chr1	23200001	23400000	5.5e-05		Chr1	23200001	23400001	0.0031		Chr1	3368921	3376426	0.602341
Chr1	2340001	2360000	0.4285		Chr1	23400001	23600000	6.5e-05		Chr1	23400001	23600001	0.00213		Chr1	3375718	3403809	0.709581
Chr1	2360001	2380000	0.429		Chr1	23600001	23800000	3.5e-05		Chr1	23600001	23800001	0.00241		Chr1	3404974	3420168	0.475665
Chr1	2380001	2400000	0.4284		Chr1	23800001	24000000	2.5e-05		Chr1	23800001	24000001	0.00177		Chr1	3426777	3436619	0.615558
Chr1	2400001	2420000	0.4258		Chr1	24000001	24200000	3.5e-05		Chr1	24000001	24200001	0.00294		Chr1	3438284	3453383	0.613025
Chr1	2420001	2440000	0.4275		Chr1	24200001	24400000	8e-05		Chr1	24200001	24400001	0.00252		Chr1	3453713	3470119	0.0747417
Chr1	2440001	2460000	0.4292		Chr1	24400001	24600000	3e-05		Chr1	24400001	24600001	0.00227		Chr1	3509580	3523745	0.18102
Chr1	2460001	2480000	0.4302		Chr1	24600001	24800000	0.0001		Chr1	24600001	24800001	0.002675		Chr1	3576976	3650312	0.07119
Chr1	2480001	2500000	0.4294		Chr1	24800001	25000000	4e-05		Chr1	24800001	25000001	0.00238		Chr1	3658005	3663077	0.153788
Chr1	2500001	2520000	0.4284		Chr1	25000001	25200000	7.5e-05		Chr1	25000001	25200001	0.00232		Chr1	3742062	3899400	0.533594
Chr1	2520001	2540000	0.4281		Chr1	25200001	25400000	6e-05		Chr1	25200001	25400001	0.001935		Chr1	3902082	3937793	0.206619
Chr1	2540001	2560000	0.4257		Chr1	25400001	25600000	1.5e-05		Chr1	25400001	25600001	0.00237		Chr1	3939106	3946621	0.159823
Chr1	2560001	2580000	0.4239		Chr1	25600001	25800000	5e-05		Chr1	25600001	25800001	0.002105		Chr1	3950114	3969679	0.412571
Chr1	2580001	2600000	0.4242		Chr1	25800001	26000000	4.5e-05		Chr1	25800001	26000001	0.00192		Chr1	3970250	3982238	0.442415
Chr1	2600001	2620000	0.4246		Chr1	26000001	26200000	6e-05		Chr1	26000001	26200001	0.002395		Chr1	3986234	3987694	0.0607115
Chr1	2620001	2640000	0.4225		Chr1	26200001	26400000	4e-05		Chr1	26200001	26400001	0.00204		Chr1	3988620	4012036	0.0254117
Chr1	2640001	2660000	0.421		Chr1	26400001	26600000	3.5e-05		Chr1	26400001	26600001	0.00219		Chr1	4012628	4017685	0.375191
Chr1	2660001	2680000	0.4197		Chr1	26600001	26800000	3.5e-05		Chr1	26600001	26800001	0.001975		Chr1	4018650	4020288	0.395383
Chr1	2680001	2700000	0.4211		Chr1	26800001	27000000	6.5e-05		Chr1	26800001	27000001	0.00225		Chr1	4022405	4027116	0.43588
Chr1	2700001	2720000	0.42		Chr1	27000001	27200000	6e-05		Chr1	27000001	27200001	0.002745		Chr1	4027237	4035900	0.0368428
Chr1	2720001	2740000	0.4206		Chr1	27200001	27400000	2.5e-05		Chr1	27200001	27400001	0.00229		Chr1	4046630	4059754	0.271165
Chr1	2740001	2760000	0.4216		Chr1	27400001	27600000	4.5e-05		Chr1	27400001	27600001	0.00249		Chr1	4060727	4087650	0.937624
Chr1	2760001	2780000	0.4218		Chr1	27600001	27800000	4e-05		Chr1	27600001	27800001	0.00239		Chr1	4088126	4174932	0.557061
Chr1	2780001	2800000	0.424		Chr1	27800001	28000000	6.5e-05		Chr1	27800001	28000001	0.00236		Chr1	4176612	4200768	0.415594
Chr1	2800001	2820000	0.4249		Chr1	28000001	28200000	3e-05		Chr1	28000001	28200001	0.0019		Chr1	4208116	4232036	0.170146
Chr1	2820001	2840000	0.4265		Chr1	28200001	28400000	7e-05		Chr1	28200001	28400001	0.002175		Chr1	4312754	4325340	0.970908
Chr1	2840001	2860000	0.4264		Chr1	28400001	28600000	3e-05		Chr1	28400001	28600001	0.00233		Chr1	4340340	4344776	0.601638
Chr1	2860001	2880000	0.4225		Chr1	28600001	28800000	2.5e-05		Chr1	28600001	28800001	0.00282		Chr1	4361572	4366256	0.959773
Chr1	2880001	2900000	0.4208		Chr1	28800001	29000000	2.5e-05		Chr1	28800001	29000001	0.002105		Chr1	4368665	4381579	0.554411
Chr1	2900001	2920000	0.4213		Chr1	29000001	29200000	5e-06		Chr1	29000001	29200001	0.001965		Chr1	4382758	4383798	0.965214
Chr1	2920001	2940000	0.4181		Chr1	29200001	29400000	5.5e-05		Chr1	29200001	29400001	0.00247		Chr1	4385787	4399802	0.215152
Chr1	2940001	2960000	0.4163		Chr1	29400001	29600000	5.5e-05		Chr1	29400001	29600001	0.002515		Chr1	4418939	4430939	0.599671
Chr1	2960001	2980000	0.4143		Chr1	29600001	29800000	6.5e-05		Chr1	29600001	29800001	0.002905		Chr1	4437554	4444037	0.732661
Chr1	2980001	3000000	0.4113		Chr1	29800001	30000000	6e-05		Chr1	29800001	30000001	0.00289		Chr1	4444300	4457477	0.302071
Chr1	3000001	3020000	0.4126		Chr1	30000001	30200000	6e-05		Chr1	30000001	30200001	0.00291		Chr1	4461447	4467826	0.0200996
Chr1	3020001	3040000	0.411		Chr1	30200001	30400000	3e-05		Chr1	30200001	30400001	0.002875		Chr1	4493103	4524809	0.284411
Chr1	3040001	3060000	0.4122		Chr1	30400001	30600000	5.5e-05		Chr1	30400001	30600001	0.00295		Chr1	4542476	4550681	0.150831
Chr1	3060001	3080000	0.417		Chr1	30600001	30800000	6.5e-05		Chr1	30600001	30800001	0.003225		Chr1	4553598	4560518	0.253263
Chr1	3080001	3100000	0.418		Chr1	30800001	31000000	2e-05		Chr1	30800001	31000001	0.003065		Chr1	4560974	4568538	0.647003
Chr1	3100001	3120000	0.4181		Chr1	31000001	31200000	1.5e-05		Chr1	31000001	31200001	0.002535		Chr1	4569612	4585877	0.818058
Chr1	3120001	3140000	0.4219		Chr1	31200001	31400000	3.5e-05		Chr1	31200001	31400001	0.00298		Chr1	4586858	4615414	0.0178276
Chr1	3140001	3160000	0.422		Chr1	31400001	31600000	1.5e-05		Chr1	31400001	31600001	0.00313		Chr1	4662817	4682506	0.987185
Chr1	3160001	3180000	0.424		Chr1	31600001	31800000	2e-05		Chr1	31600001	31800001	0.002645		Chr1	4748086	4774858	0.801576
Chr1	3180001	3200000	0.4235		Chr1	31800001	32000000	2.5e-05		Chr1	31800001	32000001	0.00284		Chr1	4777117	4779757	0.435441
Chr1	3200001	3220000	0.422		Chr1	32000001	32200000	1.5e-05		Chr1	32000001	32200001	0.0031		Chr1	4786166	4793298	0.133987
Chr1	3220001	3240000	0.4255		Chr1	32200001	32400000	1e-05		Chr1	32200001	32400001	0.00285		Chr1	4793521	4823351	0.681416
Chr1	3240001	3260000	0.425		Chr1	32400001	32600000	4e-05		Chr1	32400001	32600001	0.002555		Chr1	4882862	4917076	0.0187064
Chr1	3260001	3280000	0.4235		Chr1	32600001	32800000	5.5e-05		Chr1	32600001	32800001	0.00225		Chr1	4932527	5056401	0.0571365
Chr1	3280001	3300000	0.4227		Chr1	32800001	33000000	7.5e-05		Chr1	32800001	33000001	0.002935		Chr1	5166996	5184657	0.877196
Chr1	3300001	3320000	0.4247		Chr1	33000001	33200000	2.5e-05		Chr1	33000001	33200001	0.0028		Chr1	5187830	5201493	0.183319
Chr1	3320001	3340000	0.4228		Chr1	33200001	33400000	5.5e-05		Chr1	33200001	33400001	0.00273		Chr1	5202821	5204576	0.0713672
Chr1	3340001	3360000	0.4243		Chr1	33400001	33600000	5e-05		Chr1	33400001	33600001	0.00263		Chr1	5208123	5208771	0.230484
Chr1	3360001	3380000	0.4245		Chr1	33600001	33800000	7e-05		Chr1	33600001	33800001	0.00251		Chr1	5247587	5250061	0.308126
Chr1	3380001	3400000	0.428		Chr1	33800001	34000000	7.5e-05		Chr1	33800001	34000001	0.00287		Chr1	5309336	5315225	0.165816
Chr1	3400001	3420000	0.4276		Chr1	34000001	34200000	7e-05		Chr1	34000001	34200001	0.0029		Chr1	5315860	5331787	0.204156
Chr1	3420001	3440000	0.4226		Chr1	34200001	34400000	0.0001		Chr1	34200001	34400001	0.0027		Chr1	5337213	5347150	0.112494
Chr1	3440001	3460000	0.4192		Chr1	34400001	34600000	8.5e-05		Chr1	34400001	34600001	0.0025		Chr1	5348027	5365650	0.770151
Chr1	3460001	3480000	0.4184		Chr1	34600001	34800000	5.5e-05		Chr1	34600001	34800001	0.00266		Chr1	5397682	5426753	0.190276
Chr1	3480001	3500000	0.418		Chr1	34800001	35000000	6.5e-05		Chr1	34800001	35000001	0.002545		Chr1	5475658	5518148	0.986793
Chr1	3500001	3520000	0.4159		Chr1	35000001	35200000	8e-05		Chr1	35000001	35200001	0.002755		Chr1	5543437	5554315	0.358595
Chr1	3520001	3540000	0.416		Chr1	35200001	35400000	6.5e-05		Chr1	35200001	35400001	0.0023		Chr1	5633755	5642426	0.783743
Chr1	3540001	3560000	0.4158		Chr1	35400001	35600000	7e-05		Chr1	35400001	35600001	0.00209		Chr1	5642307	5659667	0.0546269
Chr1	3560001	3580000	0.4148		Chr1	35600001	35800000	8.5e-05		Chr1	35600001	35800001	0.00112		Chr1	5659094	5665275	0.786444
Chr1	3580001	3600000	0.4117		Chr1	35800001	36000000	6e-05		Chr1	35800001	35976506	0.001975		Chr1	5669248	5673965	0.0281657
Chr1	3600001	3620000	0.4121		Chr2	1	200000	4e-05		Chr10	1	200001	0.001865		Chr1	5692731	5701856	0.316392
Chr1	3620001	3640000	0.4157		Chr2	200001	400000	6e-05		Chr10	200001	400001	0.001065		Chr1	5704804	5715144	0.368333
Chr1	3640001	3660000	0.418		Chr2	400001	600000	2.5e-05		Chr10	400001	600001	0.00138		Chr1	5715720	5732974	0.0777299
Chr1	3660001	3680000	0.4195		Chr2	600001	800000	2.5e-05		Chr10	600001	800001	0.0013		Chr1	5721415	5724200	0.395025
Chr1	3680001	3700000	0.4207		Chr2	800001	1000000	4e-05		Chr10	800001	1000001	0.00155		Chr1	5724860	5728225	0.740863
Chr1	3700001	3720000	0.4214		Chr2	1000001	1200000	5e-06		Chr10	1000001	1200001	0.001285		Chr1	5729020	5740816	0.675524
Chr1	3720001	3740000	0.4223		Chr2	1200001	1400000	1.5e-05		Chr10	1200001	1400001	0.001315		Chr1	5742074	5747898	0.280062
Chr1	3740001	3760000	0.4228		Chr2	1400001	1600000	4.5e-05		Chr10	1400001	1600001	0.001845		Chr1	5747966	5759370	0.0203048
Chr1	3760001	3780000	0.4228		Chr2	1600001	1800000	5e-06		Chr10	1600001	1800001	0.001355		Chr1	5758568	5765792	0.112622
Chr1	3780001	3800000	0.4245		Chr2	1800001	2000000	5e-06		Chr10	1800001	2000001	0.001605		Chr1	5766854	5787010	0.758832
Chr1	3800001	3820000	0.4251		Chr2	2000001	2200000	5e-06		Chr10	2000001	2200001	0.001465		Chr1	5792574	5799584	0.931107
Chr1	3820001	3840000	0.4217		Chr2	2200001	2400000	5e-06		Chr10	2200001	2400001	0.0013		Chr1	5801177	5814828	0.907509
Chr1	3840001	3860000	0.4212		Chr2	2400001	2600000	9e-05		Chr10	2400001	2600001	0.001365		Chr1	5817762	5823388	0.979944
Chr1	3860001	3880000	0.4201		Chr2	2600001	2800000	0.000125		Chr10	2600001	2800001	0.0016		Chr1	5826605	5837215	0.390849
Chr1	3880001	3900000	0.4184		Chr2	2800001	3000000	0.000115		Chr10	2800001	3000001	0.00145		Chr1	5840895	5865237	0.0870868
Chr1	3900001	3920000	0.4182		Chr2	3000001	3200000	0.000105		Chr10	3000001	3200001	0.001585		Chr1	5866586	5899800	0.0597486
Chr1	3920001	3940000	0.4175		Chr2	3200001	3400000	0.0001		Chr10	3200001	3400001	0.001325		Chr1	5907085	5946390	0.808614
Chr1	3940001	3960000	0.4165		Chr2	3400001	3600000	8.5e-05		Chr10	3400001	3600001	0.00173		Chr1	5946300	5970090	0.669631
Chr1	3960001	3980000	0.4166		Chr2	3600001	3800000	1.5e-05		Chr10	3600001	3800001	0.00158		Chr1	5971580	5976986	0.813048
Chr1	3980001	4000000	0.4154		Chr2	3800001	4000000	1e-05		Chr10	3800001	4000001	0.001675		Chr1	6070386	6105880	0.832335
Chr1	4000001	4020000	0.4142		Chr2	4000001	4200000	4e-05		Chr10	4000001	4200001	0.00169		Chr1	6132226	6136320	0.577356
Chr1	4020001	4040000	0.4162		Chr2	4200001	4400000	5e-05		Chr10	4200001	4400001	0.002225		Chr1	6201838	6206121	0.941301
Chr1	4040001	4060000	0.4165		Chr2	4400001	4600000	9e-05		Chr10	4400001	4600001	0.00192		Chr1	6267942	6393972	0.468304
Chr1	4060001	4080000	0.416		Chr2	4600001	4800000	9.5e-05		Chr10	4600001	4800001	0.002055		Chr1	6396373	6402318	0.807485
Chr1	4080001	4100000	0.4181		Chr2	4800001	5000000	8.5e-05		Chr10	4800001	5000001	0.001395		Chr1	6400765	6404770	0.732177
Chr1	4100001	4120000	0.4179		Chr2	5000001	5200000	7e-05		Chr10	5000001	5200001	0.00254		Chr1	6406978	6408717	0.282472
Chr1	4120001	4140000	0.4159		Chr2	5200001	5400000	0.000105		Chr10	5200001	5400001	0.00177		Chr1	6408778	6432641	0.0944928
Chr1	4140001	4160000	0.4162		Chr2	5400001	5600000	1.5e-05		Chr10	5400001	5600001	0.002105		Chr1	6432876	6437895	0.594907
Chr1	4160001	4180000	0.4162		Chr2	5600001	5800000	5e-05		Chr10	5600001	5800001	0.002045		Chr1	6437918	6445358	0.584678
Chr1	4180001	4200000	0.4143		Chr2	5800001	6000000	0.000105		Chr10	5800001	6000001	0.001115		Chr1	6441610	6455492	0.474703
Chr1	4200001	4220000	0.4135		Chr2	6000001	6200000	3.5e-05		Chr10	6000001	6200001	0.0014		Chr1	6450337	6467297	0.401997
Chr1	4220001	4240000	0.4118		Chr2	6200001	6400000	4e-05		Chr10	6200001	6400001	0.00136		Chr1	6471812	6477422	0.225035
Chr1	4240001	4260000	0.4111		Chr2	6400001	6600000	7e-05		Chr10	6400001	6600001	0.00123		Chr1	6477863	6486572	0.266855
Chr1	4260001	4280000	0.4128		Chr2	6600001	6800000	9e-05		Chr10	6600001	6800001	0.001095		Chr1	6489091	6556873	0.289602
Chr1	4280001	4300000	0.4121		Chr2	6800001	7000000	3.5e-05		Chr10	6800001	7000001	0.00165		Chr1	6560682	6578055	0.0129265
Chr1	4300001	4320000	0.4129		Chr2	7000001	7200000	0.000125		Chr10	7000001	7200001	0.00165		Chr1	6579128	6659687	0.0646585
Chr1	4320001	4340000	0.4164		Chr2	7200001	7400000	8.5e-05		Chr10	7200001	7400001	0.00132		Chr1	6694919	6724021	0.202696
Chr1	4340001	4360000	0.4156		Chr2	7400001	7600000	3.5e-05		Chr10	7400001	7600001	0.001275		Chr1	6725123	6731819	0.595903
Chr1	4360001	4380000	0.4163		Chr2	7600001	7800000	5e-06		Chr10	7600001	7800001	0.001205		Chr1	6732258	6743317	0.0965917
Chr1	4380001	4400000	0.4183		Chr2	7800001	8000000	4e-05		Chr10	7800001	8000001	0.00105		Chr1	6774956	6810395	0.584249
Chr1	4400001	4420000	0.4182		Chr2	8000001	8200000	5e-06		Chr10	8000001	8200001	0.001285		Chr1	6815412	6820334	0.390804
Chr1	4420001	4440000	0.4187		Chr2	8200001	8400000	1e-05		Chr10	8200001	8400001	0.0011		Chr1	6820863	6827577	0.66117
Chr1	4440001	4460000	0.4195		Chr2	8400001	8600000	1e-05		Chr10	8400001	8600001	0.00184		Chr1	6884619	6895836	0.415823
Chr1	4460001	4480000	0.4167		Chr2	8600001	8800000	2.5e-05		Chr10	8600001	8800001	0.00297		Chr1	6896673	6910851	0.318242
Chr1	4480001	4500000	0.4148		Chr2	8800001	9000000	0.000105		Chr10	8800001	9000001	0.00337		Chr1	6911637	6922545	0.0732258
Chr1	4500001	4520000	0.4152		Chr2	9000001	9200000	0.000105		Chr10	9000001	9200001	0.003985		Chr1	6929084	6935270	0.383043
Chr1	4520001	4540000	0.4144		Chr2	9200001	9400000	0.000145		Chr10	9200001	9400001	0.0029		Chr1	6951297	7015799	0.465661
Chr1	4540001	4560000	0.4151		Chr2	9400001	9600000	0.00014		Chr10	9400001	9600001	0.001995		Chr1	7018349	7022641	0.716808
Chr1	4560001	4580000	0.4129		Chr2	9600001	9800000	0.000115		Chr10	9600001	9800001	0.001975		Chr1	7023115	7029093	0.658183
Chr1	4580001	4600000	0.4136		Chr2	9800001	10000000	9.5e-05		Chr10	9800001	10000001	0.002085		Chr1	7031085	7043105	0.950537
Chr1	4600001	4620000	0.4149		Chr2	10000001	10200000	0.00013		Chr10	10000001	10200001	0.00196		Chr1	7044798	7058197	0.917982
Chr1	4620001	4640000	0.4153		Chr2	10200001	10400000	9e-05		Chr10	10200001	10400001	0.002995		Chr1	7059088	7065585	0.0861926
Chr1	4640001	4660000	0.4158		Chr2	10400001	10600000	6e-05		Chr10	10400001	10600001	0.00292		Chr1	7074505	7079709	0.306735
Chr1	4660001	4680000	0.4182		Chr2	10600001	10800000	5e-05		Chr10	10600001	10800001	0.00178		Chr1	7081116	7109012	0.325521
Chr1	4680001	4700000	0.4192		Chr2	10800001	11000000	2.5e-05		Chr10	10800001	11000001	0.00262		Chr1	7109156	7135797	0.276199
Chr1	4700001	4720000	0.4193		Chr2	11000001	11200000	0		Chr10	11000001	11200001	0.00177		Chr1	7135232	7138746	0.910859
Chr1	4720001	4740000	0.4194		Chr2	11200001	11400000	0		Chr10	11200001	11328791	0.00139		Chr1	7139704	7176836	0.445783
Chr1	4740001	4760000	0.4191		Chr2	11400001	11600000	7e-05		Chr11	1	200001	0.002555		Chr1	7177702	7200887	0.503442
Chr1	4760001	4780000	0.426		Chr2	11600001	11800000	4.5e-05		Chr11	200001	400001	0.00208		Chr1	7201399	7210211	0.916758
Chr1	4780001	4800000	0.4245		Chr2	11800001	12000000	2e-05		Chr11	400001	600001	0.002015		Chr1	7232750	7279480	0.69622
Chr1	4800001	4820000	0.4242		Chr2	12000001	12200000	7e-05		Chr11	600001	800001	0.00171		Chr1	7305353	7308778	0.140109
Chr1	4820001	4840000	0.4253		Chr2	12200001	12400000	9.5e-05		Chr11	800001	1000001	0.000785		Chr1	7406986	7410695	0.0986946
Chr1	4840001	4860000	0.4257		Chr2	12400001	12600000	6e-05		Chr11	1000001	1200001	0.00095		Chr1	7432062	7445693	0.60838
Chr1	4860001	4880000	0.424		Chr2	12600001	12800000	5e-06		Chr11	1200001	1400001	0.00084		Chr1	7451190	7461100	0.109599
Chr1	4880001	4900000	0.4254		Chr2	12800001	13000000	6.5e-05		Chr11	1400001	1600001	0.00072		Chr1	7461198	7464717	0.236431
Chr1	4900001	4920000	0.4236		Chr2	13000001	13200000	8e-05		Chr11	1600001	1800001	0.00062		Chr1	7466751	7499169	0.242215
Chr1	4920001	4940000	0.4218		Chr2	13200001	13400000	7.5e-05		Chr11	1800001	2000001	0.00084		Chr1	7501125	7502481	0.135869
Chr1	4940001	4960000	0.4235		Chr2	13400001	13600000	4e-05		Chr11	2000001	2200001	0.000595		Chr1	7502855	7510631	0.219441
Chr1	4960001	4980000	0.417		Chr2	13600001	13800000	5e-06		Chr11	2200001	2400001	0.000655		Chr1	7510755	7521222	0.747992
Chr1	4980001	5000000	0.417		Chr2	13800001	14000000	5e-06		Chr11	2400001	2600001	0.00097		Chr1	7521969	7529327	0.489472
Chr1	5000001	5020000	0.4183		Chr2	14000001	14200000	5e-06		Chr11	2600001	2800001	0.000975		Chr1	7529478	7533139	0.327354
Chr1	5020001	5040000	0.4187		Chr2	14200001	14400000	1.5e-05		Chr11	2800001	3000001	0.001455		Chr1	7534042	7587123	0.503508
Chr1	5040001	5060000	0.4191		Chr2	14400001	14600000	7.5e-05		Chr11	3000001	3200001	0.001305		Chr1	7586254	7590624	0.334601
Chr1	5060001	5080000	0.4222		Chr2	14600001	14800000	5e-06		Chr11	3200001	3400001	0.00078		Chr1	7608062	7610573	0.462448
Chr1	5080001	5100000	0.4214		Chr2	14800001	15000000	4e-05		Chr11	3400001	3600001	0.001475		Chr1	7612030	7616874	0.0387509
Chr1	5100001	5120000	0.4229		Chr2	15000001	15200000	1e-05		Chr11	3600001	3800001	0.00141		Chr1	7654414	7678999	0.313857
Chr1	5120001	5140000	0.4237		Chr2	15200001	15400000	1.5e-05		Chr11	3800001	4000001	0.001445		Chr1	7676342	7686262	0.611593
Chr1	5140001	5160000	0.4236		Chr2	15400001	15600000	0		Chr11	4000001	4200001	0.001765		Chr1	7714049	7740218	0.0259299
Chr1	5160001	5180000	0.4254		Chr2	15600001	15800000	1.5e-05		Chr11	4200001	4400001	0.001695		Chr1	7773913	7778360	0.00161208
Chr1	5180001	5200000	0.4292		Chr2	15800001	16000000	6.5e-05		Chr11	4400001	4600001	0.001895		Chr1	7791371	7853351	0.0225936
Chr1	5200001	5220000	0.4319		Chr2	16000001	16200000	3.5e-05		Chr11	4600001	4800001	0.00169		Chr1	7867330	7882149	0.21947
Chr1	5220001	5240000	0.4344		Chr2	16200001	16400000	2e-05		Chr11	4800001	5000001	0.00189		Chr1	7923981	7936775	0.252149
Chr1	5240001	5260000	0.4379		Chr2	16400001	16600000	3e-05		Chr11	5000001	5200001	0.002		Chr1	7943044	7962702	0.60688
Chr1	5260001	5280000	0.4397		Chr2	16600001	16800000	6.5e-05		Chr11	5200001	5400001	0.000825		Chr1	7963565	7983322	0.515897
Chr1	5280001	5300000	0.4413		Chr2	16800001	17000000	3e-05		Chr11	5400001	5600001	0.00043		Chr1	7996848	8029894	0.881752
Chr1	5300001	5320000	0.4445		Chr2	17000001	17200000	4e-05		Chr11	5600001	5800001	0.000895		Chr1	8037942	8043886	0.585723
Chr1	5320001	5340000	0.4453		Chr2	17200001	17400000	1e-05		Chr11	5800001	6000001	0.000455		Chr1	8041818	8050331	0.249003
Chr1	5340001	5360000	0.4467		Chr2	17400001	17600000	1.5e-05		Chr11	6000001	6200001	0.00085		Chr1	8056670	8073055	0.336512
Chr1	5360001	5380000	0.4487		Chr2	17600001	17800000	4.5e-05		Chr11	6200001	6400001	0.00094		Chr1	8074680	8133782	0.826691
Chr1	5380001	5400000	0.4477		Chr2	17800001	18000000	7e-05		Chr11	6400001	6600001	0.000945		Chr1	8135986	8144434	0.752611
Chr1	5400001	5420000	0.4446		Chr2	18000001	18200000	4e-05		Chr11	6600001	6800001	0.000805		Chr1	8148474	8154325	0.378208
Chr1	5420001	5440000	0.4421		Chr2	18200001	18400000	2.5e-05		Chr11	6800001	7000001	0.00066		Chr1	8353166	8413943	0.681584
Chr1	5440001	5460000	0.4386		Chr2	18400001	18600000	1e-05		Chr11	7000001	7194405	0.000615		Chr1	8433835	8464252	0.959069
Chr1	5460001	5480000	0.4331		Chr2	18600001	18800000	5.5e-05		Chr12	1	200001	0.00332		Chr1	8487556	8493456	0.773243
Chr1	5480001	5500000	0.4337		Chr2	18800001	19000000	7e-05		Chr12	200001	400001	0.00362		Chr1	8498340	8508282	0.759958
Chr1	5500001	5520000	0.4298		Chr2	19000001	19200000	2.5e-05		Chr12	400001	600001	0.00391		Chr1	8514706	8521505	0.989659
Chr1	5520001	5540000	0.4299		Chr2	19200001	19400000	0		Chr12	600001	800001	0.003445		Chr1	8523896	8528799	0.500748
Chr1	5540001	5560000	0.4273		Chr2	19400001	19600000	3.5e-05		Chr12	800001	1000001	0.002915		Chr1	8531422	8541383	0.258674
Chr1	5560001	5580000	0.4254		Chr2	19600001	19800000	3e-05		Chr12	1000001	1200001	0.002465		Chr1	8547098	8612844	0.678821
Chr1	5580001	5600000	0.4233		Chr2	19800001	20000000	2e-05		Chr12	1200001	1400001	0.0021		Chr1	8658619	8663472	0.210213
Chr1	5600001	5620000	0.4238		Chr2	20000001	20200000	6.5e-05		Chr12	1400001	1600001	0.00215		Chr1	8665686	8714526	0.750602
Chr1	5620001	5640000	0.4241		Chr2	20200001	20400000	5e-06		Chr12	1600001	1800001	0.00195		Chr1	8781961	8865231	0.758097
Chr1	5640001	5660000	0.4246		Chr2	20400001	20600000	3.5e-05		Chr12	1800001	2000001	0.001775		Chr1	8866978	8908770	0.181023
Chr1	5660001	5680000	0.4252		Chr2	20600001	20800000	5e-06		Chr12	2000001	2200001	0.001765		Chr1	8923428	8939872	0.889033
Chr1	5680001	5700000	0.421		Chr2	20800001	21000000	7.5e-05		Chr12	2200001	2400001	0.00207		Chr1	8952645	8957700	0.702139
Chr1	5700001	5720000	0.4206		Chr2	21000001	21200000	5e-05		Chr12	2400001	2600001	0.00215		Chr1	8958082	8961884	0.441908
Chr1	5720001	5740000	0.4198		Chr2	21200001	21400000	5e-05		Chr12	2600001	2800001	0.002155		Chr1	8962479	8964933	0.941964
Chr1	5740001	5760000	0.4193		Chr2	21400001	21600000	3e-05		Chr12	2800001	3000001	0.002215		Chr1	8966108	8982732	0.443273
Chr1	5760001	5780000	0.4166		Chr2	21600001	21800000	1e-05		Chr12	3000001	3200001	0.002185		Chr1	8982823	9014033	0.66139
Chr1	5780001	5800000	0.4165		Chr2	21800001	22000000	2.5e-05		Chr12	3200001	3400001	0.00243		Chr1	9014473	9022349	0.00617883
Chr1	5800001	5820000	0.4165		Chr2	22000001	22200000	4e-05		Chr12	3400001	3600001	0.002655		Chr1	9021326	9028050	0.969271
Chr1	5820001	5840000	0.4147		Chr2	22200001	22400000	5e-05		Chr12	3600001	3800001	0.00163		Chr1	9024438	9032056	0.481971
Chr1	5840001	5860000	0.4136		Chr2	22400001	22600000	5.5e-05		Chr12	3800001	4000001	0.00047		Chr1	9153344	9164715	0.5654
Chr1	5860001	5880000	0.4143		Chr2	22600001	22800000	3.5e-05		Chr12	4000001	4200001	0.000815		Chr1	9185163	9198766	0.792628
Chr1	5880001	5900000	0.4164		Chr2	22800001	23000000	1e-05		Chr12	4200001	4400001	0.000855		Chr1	9206082	9222443	0.0646444
Chr1	5900001	5920000	0.4184		Chr2	23000001	23200000	2e-05		Chr12	4400001	4600001	0.00121		Chr1	9222170	9228617	0.871155
Chr1	5920001	5940000	0.4185		Chr2	23200001	23400000	2.5e-05		Chr12	4600001	4800001	0.001385		Chr1	9229953	9236579	0.473945
Chr1	5940001	5960000	0.4227		Chr2	23400001	23600000	4.5e-05		Chr12	4800001	5000001	0.00103		Chr1	9240438	9248016	0.190136
Chr1	5960001	5980000	0.4246		Chr2	23600001	23800000	5e-06		Chr12	5000001	5200001	0.001225		Chr1	9248922	9259713	0.314365
Chr1	5980001	6000000	0.425		Chr2	23800001	24000000	1e-05		Chr12	5200001	5400001	0.001225		Chr1	9259820	9274947	0.0439857
Chr1	6000001	6020000	0.4233		Chr2	24000001	24200000	7.5e-05		Chr12	5400001	5600001	0.000855		Chr1	9277981	9281099	0.921924
Chr1	6020001	6040000	0.4226		Chr2	24200001	24400000	6.5e-05		Chr12	5600001	5800001	0.0011		Chr1	9282389	9294877	0.856517
Chr1	6040001	6060000	0.4216		Chr2	24400001	24600000	2.5e-05		Chr12	5800001	6000001	0.001		Chr1	9298856	9319472	0.0679959
Chr1	6060001	6080000	0.4213		Chr2	24600001	24800000	5.5e-05		Chr12	6000001	6200001	0.000915		Chr1	9323292	9376838	0.392706
Chr1	6080001	6100000	0.4221		Chr2	24800001	25000000	2e-05		Chr12	6200001	6400001	0.001185		Chr1	9381609	9396717	0.322093
Chr1	6100001	6120000	0.4206		Chr2	25000001	25200000	5e-06		Chr12	6400001	6600001	0.00136		Chr1	9400304	9409087	0.00487143
Chr1	6120001	6140000	0.4212		Chr2	25200001	25400000	4.5e-05		Chr12	6600001	6800001	0.00071		Chr1	9411597	9452423	0.893568
Chr1	6140001	6160000	0.4172		Chr2	25400001	25600000	6e-05		Chr12	6800001	7000001	0.000795		Chr1	9484829	9499162	0.359473
Chr1	6160001	6180000	0.4178		Chr2	25600001	25800000	3e-05		Chr12	7000001	7200001	0.0012		Chr1	9504253	9528285	0.0543315
Chr1	6180001	6200000	0.4161		Chr2	25800001	26000000	1.5e-05		Chr12	7200001	7400001	0.000815		Chr1	9535658	9544491	0.35609
Chr1	6200001	6220000	0.4148		Chr2	26000001	26200000	1e-05		Chr12	7400001	7600001	0.00106		Chr1	9544693	9553323	0.152129
Chr1	6220001	6240000	0.418		Chr2	26200001	26400000	1.5e-05		Chr12	7600001	7800001	0.00095		Chr1	9606646	9609184	0.826538
Chr1	6240001	6260000	0.4173		Chr2	26400001	26600000	5e-06		Chr12	7800001	8000001	0.001185		Chr1	9671563	9675555	0.742631
Chr1	6260001	6280000	0.4174		Chr2	26600001	26800000	5e-06		Chr12	8000001	8200001	0.00138		Chr1	9772118	9794705	0.00268149
Chr1	6280001	6300000	0.4152		Chr2	26800001	27000000	4.5e-05		Chr12	8200001	8400001	0.00127		Chr1	9798044	9802692	0.8579
Chr1	6300001	6320000	0.4182		Chr2	27000001	27200000	3.5e-05		Chr12	8400001	8600001	0.00142		Chr1	9804183	9816565	0.491953
Chr1	6320001	6340000	0.4179		Chr2	27200001	27400000	3e-05		Chr12	8600001	8800001	0.001065		Chr1	9818524	9839838	0.783212
Chr1	6340001	6360000	0.418		Chr2	27400001	27600000	1e-05		Chr12	8800001	9000001	0.00142		Chr1	9840847	9849234	0.735356
Chr1	6360001	6380000	0.4177		Chr2	27600001	27800000	1e-05		Chr12	9000001	9200001	0.001225		Chr1	9849621	9854493	0.129336
Chr1	6380001	6400000	0.4185		Chr2	27800001	28000000	2.5e-05		Chr12	9200001	9400001	0.001165		Chr1	9862635	9864268	0.436503
Chr1	6400001	6420000	0.422		Chr2	28000001	28200000	2.5e-05		Chr12	9400001	9600001	0.001185		Chr1	9874147	9905774	0.19694
Chr1	6420001	6440000	0.4239		Chr2	28200001	28400000	2e-05		Chr12	9600001	9800001	0.00113		Chr1	9920810	9957992	0.904108
Chr1	6440001	6460000	0.427		Chr2	28400001	28600000	3.5e-05		Chr12	9800001	10000001	0.00144		Chr1	9958227	9960095	0.190973
Chr1	6460001	6480000	0.429		Chr2	28600001	28800000	3.5e-05		Chr12	10000001	10200001	0.001885		Chr1	9965216	9966051	0.362785
Chr1	6480001	6500000	0.4292		Chr2	28800001	29000000	2e-05		Chr12	10200001	10400001	0.00133		Chr1	9980472	10015793	0.700701
Chr1	6500001	6520000	0.4269		Chr2	29000001	29200000	5e-06		Chr12	10400001	10600001	0.001715		Chr1	10017805	10031937	0.302292
Chr1	6520001	6540000	0.4287		Chr2	29200001	29400000	2.5e-05		Chr12	10600001	10800001	0.001545		Chr1	10029941	10039185	0.230376
Chr1	6540001	6560000	0.4284		Chr2	29400001	29600000	2.5e-05		Chr12	10800001	10853637	0.000395		Chr1	10039990	10045621	0.632799
Chr1	6560001	6580000	0.4274		Chr2	29600001	29800000	1e-05		Chr13	1	200001	0.00237		Chr1	10046319	10048810	0.0612514
Chr1	6580001	6600000	0.4289		Chr2	29800001	30000000	4.5e-05		Chr13	200001	400001	0.00324		Chr1	10047969	10056008	0.891074
Chr1	6600001	6620000	0.4284		Chr2	30000001	30200000	6e-05		Chr13	400001	600001	0.00322		Chr1	10056239	10065601	0.0284732
Chr1	6620001	6640000	0.4268		Chr2	30200001	30400000	5e-06		Chr13	600001	800001	0.003185		Chr1	10075415	10089313	0.397464
Chr1	6640001	6660000	0.4252		Chr2	30400001	30600000	0		Chr13	800001	1000001	0.002815		Chr1	10087079	10097842	0.973279
Chr1	6660001	6680000	0.4248		Chr2	30600001	30800000	8e-05		Chr13	1000001	1200001	0.003335		Chr1	10099871	10145896	0.953461
Chr1	6680001	6700000	0.4251		Chr2	30800001	31000000	7e-05		Chr13	1200001	1400001	0.003165		Chr1	10151502	10152620	0.0775585
Chr1	6700001	6720000	0.4238		Chr2	31000001	31200000	3e-05		Chr13	1400001	1600001	0.00344		Chr1	10156862	10158383	0.353795
Chr1	6720001	6740000	0.423		Chr2	31200001	31400000	5e-05		Chr13	1600001	1800001	0.002825		Chr1	10161666	10168372	0.0477517
Chr1	6740001	6760000	0.4234		Chr2	31400001	31600000	2e-05		Chr13	1800001	2000001	0.00316		Chr1	10169870	10176215	0.359311
Chr1	6760001	6780000	0.4289		Chr2	31600001	31800000	2.5e-05		Chr13	2000001	2200001	0.00296		Chr1	10177069	10192271	0.0186973
Chr1	6780001	6800000	0.4303		Chr2	31800001	32000000	3e-05		Chr13	2200001	2400001	0.00319		Chr1	10193598	10208689	0.613699
Chr1	6800001	6820000	0.4284		Chr2	32000001	32200000	5.5e-05		Chr13	2400001	2600001	0.002875		Chr1	10213013	10219440	0.460179
Chr1	6820001	6840000	0.4273		Chr2	32200001	32400000	6.5e-05		Chr13	2600001	2800001	0.002565		Chr1	10220674	10256737	0.479939
Chr1	6840001	6860000	0.4277		Chr2	32400001	32600000	3e-05		Chr13	2800001	3000001	0.00238		Chr1	10291169	10300025	0.0745039
Chr1	6860001	6880000	0.4264		Chr3	1	200000	5e-06		Chr13	3000001	3200001	0.00111		Chr1	10301124	10307635	0.45523
Chr1	6880001	6900000	0.4267		Chr3	200001	400000	1.5e-05		Chr13	3200001	3400001	0.001025		Chr1	10307208	10338600	0.641106
Chr1	6900001	6920000	0.4275		Chr3	400001	600000	3.5e-05		Chr13	3400001	3600001	0.001195		Chr1	10341663	10347132	0.563754
Chr1	6920001	6940000	0.4252		Chr3	600001	800000	3.5e-05		Chr13	3600001	3800001	0.00143		Chr1	10349618	10366001	0.0745383
Chr1	6940001	6960000	0.426		Chr3	800001	1000000	1.5e-05		Chr13	3800001	4000001	0.001825		Chr1	10369234	10376698	0.25844
Chr1	6960001	6980000	0.4223		Chr3	1000001	1200000	4e-05		Chr13	4000001	4200001	0.0015		Chr1	10376936	10380524	0.486317
Chr1	6980001	7000000	0.4213		Chr3	1200001	1400000	1.5e-05		Chr13	4200001	4400001	0.001535		Chr1	10380667	10391311	0.963939
Chr1	7000001	7020000	0.4222		Chr3	1400001	1600000	0		Chr13	4400001	4600001	0.001265		Chr1	10393703	10403154	0.495732
Chr1	7020001	7040000	0.4207		Chr3	1600001	1800000	0		Chr13	4600001	4800001	0.00126		Chr1	10403683	10418164	0.157455
Chr1	7040001	7060000	0.4205		Chr3	1800001	2000000	5e-06		Chr13	4800001	5000001	0.001225		Chr1	10422431	10444034	0.815214
Chr1	7060001	7080000	0.4211		Chr3	2000001	2200000	4e-05		Chr13	5000001	5200001	0.001005		Chr1	10451561	10461206	0.250491
Chr1	7080001	7100000	0.4222		Chr3	2200001	2400000	2.5e-05		Chr13	5200001	5400001	0.00078		Chr1	10463214	10531156	0.660813
Chr1	7100001	7120000	0.4181		Chr3	2400001	2600000	7e-05		Chr13	5400001	5600001	0.00107		Chr1	10538775	10540005	0.117344
Chr1	7120001	7140000	0.4187		Chr3	2600001	2800000	5e-05		Chr13	5600001	5800001	0.001105		Chr1	10540067	10546027	0.688149
Chr1	7140001	7160000	0.4194		Chr3	2800001	3000000	6.5e-05		Chr13	5800001	6000001	0.00151		Chr1	10546037	10551515	0.784166
Chr1	7160001	7180000	0.4225		Chr3	3000001	3200000	2.5e-05		Chr13	6000001	6200001	0.001335		Chr1	10551540	10559615	0.581992
Chr1	7180001	7200000	0.4217		Chr3	3200001	3400000	2.5e-05		Chr13	6200001	6400001	0.00135		Chr1	10558827	10571368	0.850693
Chr1	7200001	7220000	0.4225		Chr3	3400001	3600000	2.5e-05		Chr13	6400001	6600001	0.00173		Chr1	10576634	10585303	0.708958
Chr1	7220001	7240000	0.4262		Chr3	3600001	3800000	3.5e-05		Chr13	6600001	6800001	0.001245		Chr1	10587011	10590518	0.638541
Chr1	7240001	7260000	0.4275		Chr3	3800001	4000000	3e-05		Chr13	6800001	7000001	0.00156		Chr1	10593598	10602895	0.753287
Chr1	7260001	7280000	0.428		Chr3	4000001	4200000	1.5e-05		Chr13	7000001	7200001	0.00123		Chr1	10613260	10617255	0.528208
Chr1	7280001	7300000	0.4272		Chr3	4200001	4400000	1.5e-05		Chr13	7200001	7400001	0.00147		Chr1	10616077	10621183	0.469408
Chr1	7300001	7320000	0.4302		Chr3	4400001	4600000	4e-05		Chr13	7400001	7600001	0.00122		Chr1	10620717	10631256	0.135381
Chr1	7320001	7340000	0.4301		Chr3	4600001	4800000	4e-05		Chr13	7600001	7800001	0.001345		Chr1	10633705	10640072	0.82105
Chr1	7340001	7360000	0.4298		Chr3	4800001	5000000	0		Chr13	7800001	8000001	0.001325		Chr1	10639509	10641028	0.265794
Chr1	7360001	7380000	0.4267		Chr3	5000001	5200000	2.5e-05		Chr13	8000001	8200001	0.001825		Chr1	10641346	10642409	0.228993
Chr1	7380001	7400000	0.4291		Chr3	5200001	5400000	1e-05		Chr13	8200001	8400001	0.00114		Chr1	10644408	10646155	0.653094
Chr1	7400001	7420000	0.4285		Chr3	5400001	5600000	3.5e-05		Chr13	8400001	8600001	0.001335		Chr1	10646914	10662055	0.823447
Chr1	7420001	7440000	0.427		Chr3	5600001	5800000	5.5e-05		Chr13	8600001	8800001	0.00184		Chr1	10663187	10666044	0.254317
Chr1	7440001	7460000	0.426		Chr3	5800001	6000000	2.5e-05		Chr13	8800001	9000001	0.001815		Chr1	10671629	10683438	0.876697
Chr1	7460001	7480000	0.425		Chr3	6000001	6200000	1e-05		Chr13	9000001	9200001	0.001675		Chr1	10686625	10693080	0.0782237
Chr1	7480001	7500000	0.4249		Chr3	6200001	6400000	1e-05		Chr13	9200001	9400001	0.00133		Chr1	10715689	10724290	0.61172
Chr1	7500001	7520000	0.4258		Chr3	6400001	6600000	5e-06		Chr13	9400001	9600001	0.00203		Chr1	10815933	10823320	0.670951
Chr1	7520001	7540000	0.4271		Chr3	6600001	6800000	2.5e-05		Chr13	9600001	9800001	0.00168		Chr1	10848312	10860134	0.116083
Chr1	7540001	7560000	0.4262		Chr3	6800001	7000000	5e-06		Chr13	9800001	10000001	0.001825		Chr1	10861124	10895591	0.166125
Chr1	7560001	7580000	0.4255		Chr3	7000001	7200000	1e-05		Chr13	10000001	10200001	0.001665		Chr1	10901913	10937627	0.572226
Chr1	7580001	7600000	0.4263		Chr3	7200001	7400000	3.5e-05		Chr13	10200001	10400001	0.00195		Chr1	10939427	10947494	0.865655
Chr1	7600001	7620000	0.4249		Chr3	7400001	7600000	1.5e-05		Chr13	10400001	10600001	0.001945		Chr1	10948367	10956707	0.506695
Chr1	7620001	7640000	0.4212		Chr3	7600001	7800000	4.5e-05		Chr13	10600001	10800001	0.00221		Chr1	10957552	10961272	0.888812
Chr1	7640001	7660000	0.4184		Chr3	7800001	8000000	6e-05		Chr13	10800001	11000001	0.00172		Chr1	10961992	10969158	0.756487
Chr1	7660001	7680000	0.4179		Chr3	8000001	8200000	0.00012		Chr13	11000001	11200001	0.00206		Chr1	10969572	10975357	0.218867
Chr1	7680001	7700000	0.4182		Chr3	8200001	8400000	6e-05		Chr13	11200001	11400001	0.00191		Chr1	10975920	11008190	0.384612
Chr1	7700001	7720000	0.4194		Chr3	8400001	8600000	0.0001		Chr13	11400001	11600001	0.001985		Chr1	11013988	11020115	0.5444
Chr1	7720001	7740000	0.4186		Chr3	8600001	8800000	9e-05		Chr13	11600001	11800001	0.00179		Chr1	11021147	11022338	0.505785
Chr1	7740001	7760000	0.4184		Chr3	8800001	9000000	0.000115		Chr13	11800001	12000001	0.00163		Chr1	11030068	11041342	0.989296
Chr1	7760001	7780000	0.4182		Chr3	9000001	9200000	0.0001		Chr13	12000001	12200001	0.002055		Chr1	11226304	11248381	0.755216
Chr1	7780001	7800000	0.4159		Chr3	9200001	9400000	6.5e-05		Chr13	12200001	12400001	0.00195		Chr1	11252518	11262320	0.197168
Chr1	7800001	7820000	0.4174		Chr3	9400001	9600000	2e-05		Chr13	12400001	12600001	0.002015		Chr1	11267072	11273251	0.881811
Chr1	7820001	7840000	0.4224		Chr3	9600001	9800000	3e-05		Chr13	12600001	12800001	0.002135		Chr1	11276717	11280796	0.0522914
Chr1	7840001	7860000	0.4273		Chr3	9800001	10000000	6e-05		Chr13	12800001	13000001	0.002405		Chr1	11287017	11321052	0.41616
Chr1	7860001	7880000	0.4269		Chr3	10000001	10200000	5.5e-05		Chr13	13000001	13200001	0.00179		Chr1	11324110	11328514	0.0707859
Chr1	7880001	7900000	0.427		Chr3	10200001	10400000	8.5e-05		Chr13	13200001	13400001	0.002095		Chr1	11328733	11342562	0.13498
Chr1	7900001	7920000	0.4257		Chr3	10400001	10600000	2e-05		Chr13	13400001	13600001	0.00185		Chr1	11351257	11368500	0.0595189
Chr1	7920001	7940000	0.4267		Chr3	10600001	10800000	3e-05		Chr13	13600001	13800001	0.002275		Chr1	11375487	11390515	0.734362
Chr1	7940001	7960000	0.4279		Chr3	10800001	11000000	7e-05		Chr13	13800001	14000001	0.002395		Chr1	11391226	11441848	0.359357
Chr1	7960001	7980000	0.4306		Chr3	11000001	11200000	4.5e-05		Chr13	14000001	14200001	0.002275		Chr1	11460157	11466833	0.487676
Chr1	7980001	8000000	0.4307		Chr3	11200001	11400000	8.5e-05		Chr13	14200001	14400001	0.002415		Chr1	11508645	11589327	0.298707
Chr1	8000001	8020000	0.4309		Chr3	11400001	11600000	4e-05		Chr13	14400001	14600001	0.002265		Chr1	11685837	11739989	0.48548
Chr1	8020001	8040000	0.4284		Chr3	11600001	11800000	0.00011		Chr13	14600001	14800001	0.002355		Chr1	11760347	11767689	0.225184
Chr1	8040001	8060000	0.4256		Chr3	11800001	12000000	0.00014		Chr13	14800001	15000001	0.002665		Chr1	11768003	11776070	0.563913
Chr1	8060001	8080000	0.4251		Chr3	12000001	12200000	0.000105		Chr13	15000001	15198843	0.00282		Chr1	11776646	11781141	0.994589
Chr1	8080001	8100000	0.4242		Chr3	12200001	12400000	7.5e-05		Chr14	1	200001	0.00255		Chr1	11783769	11793401	0.211437
Chr1	8100001	8120000	0.4246		Chr3	12400001	12600000	3.5e-05		Chr14	200001	400001	0.002525		Chr1	11793909	11802704	0.532154
Chr1	8120001	8140000	0.4247		Chr3	12600001	12800000	4.5e-05		Chr14	400001	600001	0.002185		Chr1	11803921	11810275	0.724215
Chr1	8140001	8160000	0.4254		Chr3	12800001	13000000	5e-05		Chr14	600001	800001	0.00212		Chr1	11812525	11814417	0.143516
Chr1	8160001	8180000	0.428		Chr3	13000001	13200000	5.5e-05		Chr14	800001	1000001	0.00258		Chr1	11816397	11851804	0.156645
Chr1	8180001	8200000	0.4306		Chr3	13200001	13400000	5e-05		Chr14	1000001	1200001	0.00229		Chr1	11823718	11826681	0.958929
Chr1	8200001	8220000	0.4326		Chr3	13400001	13600000	4e-05		Chr14	1200001	1400001	0.002595		Chr1	11854282	11857835	0.179416
Chr1	8220001	8240000	0.4336		Chr3	13600001	13800000	2.5e-05		Chr14	1400001	1600001	0.001865		Chr1	11858398	11863013	0.84966
Chr1	8240001	8260000	0.434		Chr3	13800001	14000000	4.5e-05		Chr14	1600001	1800001	0.002695		Chr1	11864632	11883405	0.546153
Chr1	8260001	8280000	0.4349		Chr3	14000001	14200000	4e-05		Chr14	1800001	2000001	0.002295		Chr1	11894412	11896064	0.0172628
Chr1	8280001	8300000	0.4349		Chr3	14200001	14400000	2.5e-05		Chr14	2000001	2200001	0.00285		Chr1	11899520	11902783	0.312105
Chr1	8300001	8320000	0.4347		Chr3	14400001	14600000	8e-05		Chr14	2200001	2400001	0.00257		Chr1	11904479	11916307	0.354131
Chr1	8320001	8340000	0.4329		Chr3	14600001	14800000	8e-05		Chr14	2400001	2600001	0.002515		Chr1	11923811	11963815	0.351932
Chr1	8340001	8360000	0.4313		Chr3	14800001	15000000	7e-05		Chr14	2600001	2800001	0.00274		Chr1	11965371	11984939	0.432046
Chr1	8360001	8380000	0.4255		Chr3	15000001	15200000	3e-05		Chr14	2800001	3000001	0.002245		Chr1	11990769	12003607	0.117437
Chr1	8380001	8400000	0.4251		Chr3	15200001	15400000	6.5e-05		Chr14	3000001	3200001	0.00256		Chr1	12022409	12062856	0.628192
Chr1	8400001	8420000	0.4231		Chr3	15400001	15600000	0.0001		Chr14	3200001	3400001	0.002505		Chr1	12063717	12074696	0.761999
Chr1	8420001	8440000	0.4219		Chr3	15600001	15800000	0.0001		Chr14	3400001	3600001	0.00254		Chr1	12073527	12079712	0.313018
Chr1	8440001	8460000	0.4225		Chr3	15800001	16000000	8.5e-05		Chr14	3600001	3800001	0.00222		Chr1	12081872	12091296	0.50078
Chr1	8460001	8480000	0.4224		Chr3	16000001	16200000	4.5e-05		Chr14	3800001	4000001	0.002325		Chr1	12094382	12146949	0.96688
Chr1	8480001	8500000	0.4231		Chr3	16200001	16400000	2.5e-05		Chr14	4000001	4200001	0.002205		Chr1	12162682	12176936	0.1414
Chr1	8500001	8520000	0.4239		Chr3	16400001	16600000	4.5e-05		Chr14	4200001	4400001	0.002075		Chr1	12199239	12214922	0.45007
Chr1	8520001	8540000	0.4271		Chr3	16600001	16800000	6e-05		Chr14	4400001	4600001	0.001865		Chr1	12214934	12215663	0.679042
Chr1	8540001	8560000	0.4285		Chr3	16800001	17000000	7e-05		Chr14	4600001	4800001	0.00205		Chr1	12238729	12241624	0.496743
Chr1	8560001	8580000	0.4284		Chr3	17000001	17200000	8.5e-05		Chr14	4800001	5000001	0.00251		Chr1	12301029	12314351	0.648106
Chr1	8580001	8600000	0.4247		Chr3	17200001	17400000	8e-05		Chr14	5000001	5200001	0.00226		Chr1	12319502	12343176	0.101097
Chr1	8600001	8620000	0.4241		Chr3	17400001	17600000	5.5e-05		Chr14	5200001	5400001	0.002455		Chr1	12352973	12356514	0.856795
Chr1	8620001	8640000	0.4231		Chr3	17600001	17800000	3e-05		Chr14	5400001	5600001	0.002035		Chr1	12358900	12364468	0.894584
Chr1	8640001	8660000	0.4199		Chr3	17800001	18000000	3.5e-05		Chr14	5600001	5800001	0.001705		Chr1	12369161	12376770	0.0899954
Chr1	8660001	8680000	0.4204		Chr3	18000001	18200000	8.5e-05		Chr14	5800001	6000001	0.00246		Chr1	12377467	12387302	0.52845
Chr1	8680001	8700000	0.4209		Chr3	18200001	18400000	9.5e-05		Chr14	6000001	6200001	0.002655		Chr1	12388210	12391248	0.0650767
Chr1	8700001	8720000	0.4207		Chr3	18400001	18600000	1e-05		Chr14	6200001	6400001	0.002205		Chr1	12401377	12442539	0.413637
Chr1	8720001	8740000	0.4191		Chr3	18600001	18800000	7.5e-05		Chr14	6400001	6600001	0.001875		Chr1	12442498	12443885	0.510605
Chr1	8740001	8760000	0.417		Chr3	18800001	19000000	3e-05		Chr14	6600001	6800001	0.00202		Chr1	12444433	12457968	0.716421
Chr1	8760001	8780000	0.4167		Chr3	19000001	19200000	4e-05		Chr14	6800001	7000001	0.001725		Chr1	12455902	12470426	0.424107
Chr1	8780001	8800000	0.4155		Chr3	19200001	19400000	5.5e-05		Chr14	7000001	7200001	0.00129		Chr1	12474816	12489928	0.317591
Chr1	8800001	8820000	0.4166		Chr3	19400001	19600000	4e-05		Chr14	7200001	7400001	0.001885		Chr1	12503750	12520799	0.723506
Chr1	8820001	8840000	0.4201		Chr3	19600001	19800000	4.5e-05		Chr14	7400001	7600001	0.0015		Chr1	12521533	12529692	0.609848
Chr1	8840001	8860000	0.4233		Chr3	19800001	20000000	1e-05		Chr14	7600001	7800001	0.00182		Chr1	12532568	12545060	0.640833
Chr1	8860001	8880000	0.4227		Chr3	20000001	20200000	5e-06		Chr14	7800001	8000001	0.001805		Chr1	12546078	12561374	0.896026
Chr1	8880001	8900000	0.4222		Chr3	20200001	20400000	2.5e-05		Chr14	8000001	8200001	0.00158		Chr1	12562772	12572354	0.93454
Chr1	8900001	8920000	0.4224		Chr3	20400001	20600000	1e-05		Chr14	8200001	8400001	0.001735		Chr1	12572729	12575317	0.103675
Chr1	8920001	8940000	0.4224		Chr3	20600001	20800000	1.5e-05		Chr14	8400001	8600001	0.00215		Chr1	12575594	12581593	0.354758
Chr1	8940001	8960000	0.4235		Chr3	20800001	21000000	2e-05		Chr14	8600001	8800001	0.001535		Chr1	12582703	12596224	0.998872
Chr1	8960001	8980000	0.4252		Chr3	21000001	21200000	3e-05		Chr14	8800001	9000001	0.001465		Chr1	12596329	12605775	0.709745
Chr1	8980001	9000000	0.4264		Chr3	21200001	21400000	1.5e-05		Chr14	9000001	9200001	0.00136		Chr1	12724108	12726732	0.516609
Chr1	9000001	9020000	0.4251		Chr3	21400001	21600000	2e-05		Chr14	9200001	9400001	0.00164		Chr1	12744338	12746186	0.0831145
Chr1	9020001	9040000	0.4238		Chr3	21600001	21800000	1e-05		Chr14	9400001	9600001	0.00144		Chr1	12755650	12763581	0.0431109
Chr1	9040001	9060000	0.4242		Chr3	21800001	22000000	3.5e-05		Chr14	9600001	9800001	0.001425		Chr1	12767225	12769076	0.0194873
Chr1	9060001	9080000	0.4248		Chr3	22000001	22200000	7e-05		Chr14	9800001	10000001	0.00135		Chr1	12771080	12780126	0.59036
Chr1	9080001	9100000	0.4264		Chr3	22200001	22400000	6.5e-05		Chr14	10000001	10200001	0.00165		Chr1	12781347	12797422	0.0789495
Chr1	9100001	9120000	0.4257		Chr3	22400001	22600000	5.5e-05		Chr14	10200001	10400001	0.00198		Chr1	12813622	12817146	0.507396
Chr1	9120001	9140000	0.4263		Chr3	22600001	22800000	2.5e-05		Chr14	10400001	10600001	0.001835		Chr1	12829900	12877588	0.263807
Chr1	9140001	9160000	0.4273		Chr3	22800001	23000000	2e-05		Chr14	10600001	10800001	0.00174		Chr1	12926033	12953114	0.161384
Chr1	9160001	9180000	0.4283		Chr4	1	200000	7.5e-05		Chr14	10800001	11000001	0.00208		Chr1	12978247	12996360	0.981668
Chr1	9180001	9200000	0.4296		Chr4	200001	400000	8.5e-05		Chr14	11000001	11200001	0.00193		Chr1	13009551	13019648	0.00886536
Chr1	9200001	9220000	0.4316		Chr4	400001	600000	5e-05		Chr14	11200001	11400001	0.001885		Chr1	13043798	13047759	0.25913
Chr1	9220001	9240000	0.4336		Chr4	600001	800000	6.5e-05		Chr14	11400001	11600001	0.00188		Chr1	13169457	13174274	0.402454
Chr1	9240001	9260000	0.4325		Chr4	800001	1000000	4.5e-05		Chr14	11600001	11800001	0.00199		Chr1	13364037	13366839	0.584695
Chr1	9260001	9280000	0.4344		Chr4	1000001	1200000	5.5e-05		Chr14	11800001	12000001	0.00179		Chr1	13529441	13550075	0.13476
Chr1	9280001	9300000	0.4339		Chr4	1200001	1400000	8e-05		Chr14	12000001	12200001	0.00181		Chr1	13599905	13602886	0.468768
Chr1	9300001	9320000	0.4339		Chr4	1400001	1600000	3e-05		Chr14	12200001	12400001	0.00111		Chr1	13703764	13710291	0.0961058
Chr1	9320001	9340000	0.4331		Chr4	1600001	1800000	4e-05		Chr14	12400001	12600001	0.00189		Chr1	13897475	13898334	0.772742
Chr1	9340001	9360000	0.431		Chr4	1800001	2000000	1.5e-05		Chr14	12600001	12800001	0.001735		Chr1	14140248	14170786	0.947402
Chr1	9360001	9380000	0.4295		Chr4	2000001	2200000	6.5e-05		Chr14	12800001	13000001	0.001865		Chr1	14185441	14245354	0.00353383
Chr1	9380001	9400000	0.4311		Chr4	2200001	2400000	4.5e-05		Chr14	13000001	13200001	0.00213		Chr1	14256905	14269043	0.934579
Chr1	9400001	9420000	0.43		Chr4	2400001	2600000	1e-05		Chr14	13200001	13400001	0.00177		Chr1	14308830	14324202	0.254855
Chr1	9420001	9440000	0.4282		Chr4	2600001	2800000	3.5e-05		Chr14	13400001	13600001	0.001785		Chr1	14325008	14329814	0.198075
Chr1	9440001	9460000	0.432		Chr4	2800001	3000000	2.5e-05		Chr14	13600001	13800001	0.00156		Chr1	14332379	14353295	0.0488963
Chr1	9460001	9480000	0.4326		Chr4	3000001	3200000	0.0001		Chr14	13800001	14000001	0.001855		Chr1	14356078	14369159	0.992431
Chr1	9480001	9500000	0.434		Chr4	3200001	3400000	7.5e-05		Chr14	14000001	14200001	0.001515		Chr1	14370678	14385599	0.506904
Chr1	9500001	9520000	0.4384		Chr4	3400001	3600000	0.00011		Chr14	14200001	14400001	0.001445		Chr1	14385944	14399104	0.572821
Chr1	9520001	9540000	0.4392		Chr4	3600001	3800000	7.5e-05		Chr14	14400001	14600001	0.00143		Chr1	14400323	14407645	0.79389
Chr1	9540001	9560000	0.4428		Chr4	3800001	4000000	7e-05		Chr14	14600001	14800001	0.002975		Chr1	14409324	14481488	0.0404756
Chr1	9560001	9580000	0.4449		Chr4	4000001	4200000	7.5e-05		Chr14	14800001	15000001	0.00373		Chr1	14481501	14500922	0.29781
Chr1	9580001	9600000	0.4446		Chr4	4200001	4400000	6.5e-05		Chr14	15000001	15200001	0.003165		Chr1	14505249	14516481	0.263624
Chr1	9600001	9620000	0.4458		Chr4	4400001	4600000	0.00015		Chr14	15200001	15400001	0.00268		Chr1	14535194	14639795	0.431875
Chr1	9620001	9640000	0.4462		Chr4	4600001	4800000	0.00012		Chr14	15400001	15600001	0.00276		Chr1	14639476	14687769	0.586702
Chr1	9640001	9660000	0.4419		Chr4	4800001	5000000	7.5e-05		Chr14	15600001	15800001	0.002775		Chr1	14704193	14715604	0.877651
Chr1	9660001	9680000	0.4394		Chr4	5000001	5200000	6e-05		Chr14	15800001	16000001	0.002305		Chr1	14738926	14746670	0.175836
Chr1	9680001	9700000	0.437		Chr4	5200001	5400000	3e-05		Chr14	16000001	16200001	0.00305		Chr1	14748955	14758201	0.411979
Chr1	9700001	9720000	0.4333		Chr4	5400001	5600000	8e-05		Chr14	16200001	16400001	0.00231		Chr1	14759054	14766774	0.168935
Chr1	9720001	9740000	0.4343		Chr4	5600001	5800000	4e-05		Chr14	16400001	16583198	0.002065		Chr1	14767488	14769813	0.424717
Chr1	9740001	9760000	0.433		Chr4	5800001	6000000	2e-05		Chr15	1	200001	0.002495		Chr1	14769619	14809417	0.0203828
Chr1	9760001	9780000	0.4305		Chr4	6000001	6200000	4.5e-05		Chr15	200001	400001	0.002245		Chr1	14811357	14819657	0.980167
Chr1	9780001	9800000	0.4307		Chr4	6200001	6400000	5e-05		Chr15	400001	600001	0.00219		Chr1	14821082	14829919	0.887666
Chr1	9800001	9820000	0.4305		Chr4	6400001	6600000	8.5e-05		Chr15	600001	800001	0.002135		Chr1	14833972	14838166	0.39828
Chr1	9820001	9840000	0.4305		Chr4	6600001	6800000	4.5e-05		Chr15	800001	1000001	0.001875		Chr1	14838254	14840240	1.06e-06
Chr1	9840001	9860000	0.4335		Chr4	6800001	7000000	5.5e-05		Chr15	1000001	1200001	0.00183		Chr1	14850208	14879252	0.72238
Chr1	9860001	9880000	0.4332		Chr4	7000001	7200000	1e-05		Chr15	1200001	1400001	0.001235		Chr1	14879691	14882815	0.200112
Chr1	9880001	9900000	0.4335		Chr4	7200001	7400000	3.5e-05		Chr15	1400001	1600001	0.00187		Chr1	14885684	14896100	0.042147
Chr1	9900001	9920000	0.4338		Chr4	7400001	7600000	9e-05		Chr15	1600001	1800001	0.001555		Chr1	14898209	14919419	0.10393
Chr1	9920001	9940000	0.4309		Chr4	7600001	7800000	5.5e-05		Chr15	1800001	2000001	0.00158		Chr1	14920351	14943392	0.468748
Chr1	9940001	9960000	0.4307		Chr4	7800001	8000000	0.000105		Chr15	2000001	2200001	0.001585		Chr1	14945766	14951610	0.24171
Chr1	9960001	9980000	0.433		Chr4	8000001	8200000	8.5e-05		Chr15	2200001	2400001	0.001115		Chr1	14976230	14981223	0.974899
Chr1	9980001	10000000	0.4328		Chr4	8200001	8400000	0.00011		Chr15	2400001	2600001	0.00159		Chr1	14998989	15019458	0.665197
Chr1	10000001	10020000	0.4342		Chr4	8400001	8600000	5.5e-05		Chr15	2600001	2800001	0.001455		Chr1	15044834	15050414	0.0282151
Chr1	10020001	10040000	0.4342		Chr4	8600001	8800000	4.5e-05		Chr15	2800001	3000001	0.001235		Chr1	15051693	15057419	0.180322
Chr1	10040001	10060000	0.4319		Chr4	8800001	9000000	4e-05		Chr15	3000001	3200001	0.000955		Chr1	15057933	15071338	0.891548
Chr1	10060001	10080000	0.4331		Chr4	9000001	9200000	7e-05		Chr15	3200001	3400001	0.00107		Chr1	15076048	15092111	0.0946539
Chr1	10080001	10100000	0.4369		Chr4	9200001	9400000	0.0001		Chr15	3400001	3600001	0.000905		Chr1	15116082	15138271	0.989782
Chr1	10100001	10120000	0.4386		Chr4	9400001	9600000	7.5e-05		Chr15	3600001	3800001	0.0014		Chr1	15150569	15157947	0.272197
Chr1	10120001	10140000	0.4391		Chr4	9600001	9800000	5.5e-05		Chr15	3800001	4000001	0.001185		Chr1	15202687	15206488	0.590604
Chr1	10140001	10160000	0.4394		Chr4	9800001	10000000	2.5e-05		Chr15	4000001	4200001	0.001805		Chr1	15216642	15321033	0.620558
Chr1	10160001	10180000	0.4366		Chr4	10000001	10200000	8e-05		Chr15	4200001	4400001	0.00101		Chr1	15366188	15372064	0.77284
Chr1	10180001	10200000	0.4332		Chr4	10200001	10400000	9.5e-05		Chr15	4400001	4600001	0.00129		Chr1	15377084	15383145	0.92396
Chr1	10200001	10220000	0.4319		Chr4	10400001	10600000	7.5e-05		Chr15	4600001	4800001	0.00139		Chr1	15538541	15546172	0.978094
Chr1	10220001	10240000	0.4333		Chr4	10600001	10800000	4.5e-05		Chr15	4800001	5000001	0.001005		Chr1	15549239	15553479	0.426358
Chr1	10240001	10260000	0.4342		Chr4	10800001	11000000	6.5e-05		Chr15	5000001	5200001	0.00091		Chr1	15554535	15586888	0.784863
Chr1	10260001	10280000	0.4345		Chr4	11000001	11200000	4.5e-05		Chr15	5200001	5400001	0.00109		Chr1	15586819	15633057	0.593154
Chr1	10280001	10300000	0.4315		Chr4	11200001	11400000	1e-05		Chr15	5400001	5600001	0.00116		Chr1	15659521	15670304	0.408813
Chr1	10300001	10320000	0.4285		Chr4	11400001	11600000	8e-05		Chr15	5600001	5800001	0.00076		Chr1	15670904	15680693	0.16234
Chr1	10320001	10340000	0.4293		Chr4	11600001	11800000	9e-05		Chr15	5800001	6000001	0.000785		Chr1	15681327	15692347	0.709481
Chr1	10340001	10360000	0.4279		Chr4	11800001	12000000	3e-05		Chr15	6000001	6200001	0.000895		Chr1	15694522	15701916	0.691361
Chr1	10360001	10380000	0.4285		Chr4	12000001	12200000	3.5e-05		Chr15	6200001	6400001	0.00105		Chr1	15702744	15707678	0.0333132
Chr1	10380001	10400000	0.4337		Chr4	12200001	12400000	2e-05		Chr15	6400001	6600001	0.000805		Chr1	15708354	15716221	0.430361
Chr1	10400001	10420000	0.4328		Chr4	12400001	12600000	7.5e-05		Chr15	6600001	6800001	0.001515		Chr1	15714748	15718112	0.772342
Chr1	10420001	10440000	0.4315		Chr4	12600001	12800000	2e-05		Chr15	6800001	7000001	0.00102		Chr1	15718236	15727062	0.988549
Chr1	10440001	10460000	0.4295		Chr4	12800001	13000000	7e-05		Chr15	7000001	7200001	0.001015		Chr1	15730919	15766028	0.510984
Chr1	10460001	10480000	0.4315		Chr4	13000001	13200000	5e-05		Chr15	7200001	7400001	0.0013		Chr1	15766888	15780821	0.943808
Chr1	10480001	10500000	0.4313		Chr4	13200001	13400000	7e-05		Chr15	7400001	7600001	0.000975		Chr1	15782053	15787403	0.435825
Chr1	10500001	10520000	0.431		Chr4	13400001	13600000	3.5e-05		Chr15	7600001	7800001	0.00068		Chr1	15786372	15797012	0.776001
Chr1	10520001	10540000	0.43		Chr4	13600001	13800000	1.5e-05		Chr15	7800001	8000001	0.000655		Chr1	15797178	15800242	0.34378
Chr1	10540001	10560000	0.4318		Chr4	13800001	14000000	3.5e-05		Chr15	8000001	8200001	0.00068		Chr1	15804886	15807388	0.504544
Chr1	10560001	10580000	0.4336		Chr4	14000001	14200000	4e-05		Chr15	8200001	8400001	0.000515		Chr1	15825739	15834907	0.218028
Chr1	10580001	10600000	0.4308		Chr4	14200001	14400000	2e-05		Chr15	8400001	8600001	0.00067		Chr1	15836201	15863408	0.606901
Chr1	10600001	10620000	0.4314		Chr4	14400001	14600000	3e-05		Chr15	8600001	8800001	0.00071		Chr1	15868569	15877459	0.513787
Chr1	10620001	10640000	0.4319		Chr4	14600001	14800000	3.5e-05		Chr15	8800001	9000001	0.00275		Chr1	15888782	15908997	0.452037
Chr1	10640001	10660000	0.4355		Chr4	14800001	15000000	8e-05		Chr15	9000001	9200001	0.003005		Chr1	15909848	15941356	0.133419
Chr1	10660001	10680000	0.4319		Chr4	15000001	15200000	1e-05		Chr15	9200001	9400001	0.002935		Chr1	15942523	15947428	0.544588
Chr1	10680001	10700000	0.4319		Chr4	15200001	15400000	5e-06		Chr15	9400001	9600001	0.003475		Chr1	15973531	15998710	0.516407
Chr1	10700001	10720000	0.4339		Chr4	15400001	15600000	4e-05		Chr15	9600001	9800001	0.00357		Chr1	16004469	16032197	0.363177
Chr1	10720001	10740000	0.4354		Chr4	15600001	15800000	4.5e-05		Chr15	9800001	10000001	0.002595		Chr1	16033861	16040635	0.299767
Chr1	10740001	10760000	0.4367		Chr4	15800001	16000000	1.5e-05		Chr15	10000001	10200001	0.002535		Chr1	16067790	16068584	0.865901
Chr1	10760001	10780000	0.4364		Chr4	16000001	16200000	3e-05		Chr15	10200001	10338647	0.00188		Chr1	16077250	16082536	0.680986
Chr1	10780001	10800000	0.4359		Chr4	16200001	16400000	3.5e-05		Chr16	1	200001	0.00208		Chr1	16226042	16230410	0.247159
Chr1	10800001	10820000	0.4344		Chr4	16400001	16600000	1e-05		Chr16	200001	400001	0.001985		Chr1	16275306	16283671	0.661198
Chr1	10820001	10840000	0.4323		Chr4	16600001	16800000	3.5e-05		Chr16	400001	600001	0.00241		Chr1	16288812	16308024	0.714286
Chr1	10840001	10860000	0.4309		Chr4	16800001	17000000	3.5e-05		Chr16	600001	800001	0.00242		Chr1	16311478	16314005	0.656537
Chr1	10860001	10880000	0.4335		Chr4	17000001	17200000	5e-05		Chr16	800001	1000001	0.002605		Chr1	16327964	16329244	0.790488
Chr1	10880001	10900000	0.4332		Chr4	17200001	17400000	1.5e-05		Chr16	1000001	1200001	0.000965		Chr1	16346612	16352880	0.707467
Chr1	10900001	10920000	0.4342		Chr4	17400001	17600000	2.5e-05		Chr16	1200001	1400001	0.000785		Chr1	16360115	16383775	0.015045
Chr1	10920001	10940000	0.4336		Chr4	17600001	17800000	3.5e-05		Chr16	1400001	1600001	0.00115		Chr1	16389930	16397632	0.390429
Chr1	10940001	10960000	0.4315		Chr4	17800001	18000000	2.5e-05		Chr16	1600001	1800001	0.0008		Chr1	16398407	16400795	0.00853597
Chr1	10960001	10980000	0.4301		Chr4	18000001	18200000	3.5e-05		Chr16	1800001	2000001	0.00122		Chr1	16410104	16424540	0.716703
Chr1	10980001	11000000	0.4306		Chr4	18200001	18400000	2e-05		Chr16	2000001	2200001	0.0011		Chr1	16430666	16485683	0.276438
Chr1	11000001	11020000	0.4338		Chr4	18400001	18600000	5e-06		Chr16	2200001	2400001	0.000905		Chr1	16487995	16493579	0.786987
Chr1	11020001	11040000	0.4357		Chr4	18600001	18800000	1e-05		Chr16	2400001	2600001	0.00131		Chr1	16493871	16501212	0.100255
Chr1	11040001	11060000	0.4335		Chr4	18800001	19000000	2.5e-05		Chr16	2600001	2800001	0.00132		Chr1	16501190	16510465	0.462904
Chr1	11060001	11080000	0.4366		Chr4	19000001	19200000	3.5e-05		Chr16	2800001	3000001	0.00115		Chr1	16507413	16521336	0.505443
Chr1	11080001	11100000	0.4396		Chr4	19200001	19400000	5.5e-05		Chr16	3000001	3200001	0.0013		Chr1	16536313	16588869	0.520406
Chr1	11100001	11120000	0.437		Chr4	19400001	19600000	3.5e-05		Chr16	3200001	3400001	0.001345		Chr1	16595570	16601298	0.404515
Chr1	11120001	11140000	0.4379		Chr4	19600001	19800000	1.5e-05		Chr16	3400001	3600001	0.00143		Chr1	16621209	16642094	0.385758
Chr1	11140001	11160000	0.4378		Chr4	19800001	20000000	1.5e-05		Chr16	3600001	3800001	0.001395		Chr1	16648826	16654605	0.718444
Chr1	11160001	11180000	0.4411		Chr4	20000001	20200000	4e-05		Chr16	3800001	4000001	0.0018		Chr1	16657415	16660320	0.593384
Chr1	11180001	11200000	0.4434		Chr4	20200001	20400000	3e-05		Chr16	4000001	4200001	0.001395		Chr1	16668029	16693935	0.567616
Chr1	11200001	11220000	0.4413		Chr4	20400001	20600000	3.5e-05		Chr16	4200001	4400001	0.001045		Chr1	16697281	16701703	0.182304
Chr1	11220001	11240000	0.4401		Chr4	20600001	20800000	2e-05		Chr16	4400001	4600001	0.00125		Chr1	16739386	16741776	0.265955
Chr1	11240001	11260000	0.4413		Chr4	20800001	21000000	1.5e-05		Chr16	4600001	4800001	0.00137		Chr1	16789554	16824809	0.607722
Chr1	11260001	11280000	0.4361		Chr4	21000001	21200000	3e-05		Chr16	4800001	5000001	0.001435		Chr1	16832190	16838240	0.0551418
Chr1	11280001	11300000	0.4345		Chr4	21200001	21400000	3.5e-05		Chr16	5000001	5200001	0.00142		Chr1	16848665	16881326	0.47178
Chr1	11300001	11320000	0.4367		Chr4	21400001	21600000	5e-06		Chr16	5200001	5400001	0.001		Chr1	16883537	16892835	0.100565
Chr1	11320001	11340000	0.4355		Chr5	1	200000	3.5e-05		Chr16	5400001	5600001	0.001365		Chr1	16908295	16913119	0.458584
Chr1	11340001	11360000	0.4346		Chr5	200001	400000	2e-05		Chr16	5600001	5800001	0.001085		Chr1	16938749	16971628	0.393619
Chr1	11360001	11380000	0.4309		Chr5	400001	600000	3.5e-05		Chr16	5800001	6000001	0.00117		Chr1	16979488	16996747	0.789067
Chr1	11380001	11400000	0.4299		Chr5	600001	800000	3.5e-05		Chr16	6000001	6200001	0.00153		Chr1	17003350	17012084	0.757932
Chr1	11400001	11420000	0.429		Chr5	800001	1000000	4e-05		Chr16	6200001	6400001	0.000905		Chr1	17012251	17013322	0.534952
Chr1	11420001	11440000	0.4299		Chr5	1000001	1200000	0.0001		Chr16	6400001	6600001	0.00122		Chr1	17014410	17017750	0.621265
Chr1	11440001	11460000	0.4305		Chr5	1200001	1400000	4.5e-05		Chr16	6600001	6800001	0.001325		Chr1	17017987	17026664	0.211316
Chr1	11460001	11480000	0.4342		Chr5	1400001	1600000	8e-05		Chr16	6800001	7000001	0.00113		Chr1	17028418	17031055	0.0519655
Chr1	11480001	11500000	0.435		Chr5	1600001	1800000	7e-05		Chr16	7000001	7200001	0.00132		Chr1	17032163	17035964	1
Chr1	11500001	11520000	0.4371		Chr5	1800001	2000000	4.5e-05		Chr16	7200001	7400001	0.001435		Chr1	17038714	17045121	0.00363022
Chr1	11520001	11540000	0.4405		Chr5	2000001	2200000	2e-05		Chr16	7400001	7600001	0.001665		Chr1	17046488	17075769	0.0539561
Chr1	11540001	11560000	0.4419		Chr5	2200001	2400000	2e-05		Chr16	7600001	7800001	0.00183		Chr1	17085040	17096823	0.514119
Chr1	11560001	11580000	0.4429		Chr5	2400001	2600000	5e-06		Chr16	7800001	8000001	0.001715		Chr1	17097540	17105001	0.807969
Chr1	11580001	11600000	0.4413		Chr5	2600001	2800000	6.5e-05		Chr16	8000001	8200001	0.00123		Chr1	17107237	17120340	0.568959
Chr1	11600001	11620000	0.4428		Chr5	2800001	3000000	2.5e-05		Chr16	8200001	8400001	0.001385		Chr1	17121195	17138578	0.63617
Chr1	11620001	11640000	0.4426		Chr5	3000001	3200000	1e-05		Chr16	8400001	8600001	0.001505		Chr1	17139909	17148197	0.0828832
Chr1	11640001	11660000	0.4439		Chr5	3200001	3400000	5.5e-05		Chr16	8600001	8800001	0.00147		Chr1	17148361	17153925	0.510212
Chr1	11660001	11680000	0.4435		Chr5	3400001	3600000	5.5e-05		Chr16	8800001	9000001	0.00175		Chr1	17154035	17159222	0.104148
Chr1	11680001	11700000	0.4428		Chr5	3600001	3800000	5.5e-05		Chr16	9000001	9200001	0.00156		Chr1	17161507	17200009	0.950499
Chr1	11700001	11720000	0.4412		Chr5	3800001	4000000	0.000125		Chr16	9200001	9400001	0.001265		Chr1	17201880	17213720	0.942536
Chr1	11720001	11740000	0.4419		Chr5	4000001	4200000	0.0001		Chr16	9400001	9600001	0.001265		Chr1	17213087	17219594	0.306577
Chr1	11740001	11760000	0.4403		Chr5	4200001	4400000	0.00011		Chr16	9600001	9800001	0.0013		Chr1	17219779	17223557	0.28556
Chr1	11760001	11780000	0.4406		Chr5	4400001	4600000	2e-05		Chr16	9800001	10000001	0.00119		Chr1	17224036	17236847	0.879078
Chr1	11780001	11800000	0.4432		Chr5	4600001	4800000	1e-05		Chr16	10000001	10200001	0.001285		Chr1	17237338	17239956	0.589201
Chr1	11800001	11820000	0.4423		Chr5	4800001	5000000	6.5e-05		Chr16	10200001	10400001	0.00172		Chr1	17240592	17247913	0.44676
Chr1	11820001	11840000	0.4419		Chr5	5000001	5200000	3.5e-05		Chr16	10400001	10600001	0.00162		Chr1	17248240	17258546	0.0142215
Chr1	11840001	11860000	0.4399		Chr5	5200001	5400000	4.5e-05		Chr16	10600001	10800001	0.001565		Chr1	17261207	17272174	0.609483
Chr1	11860001	11880000	0.435		Chr5	5400001	5600000	5e-05		Chr16	10800001	11000001	0.001825		Chr1	17263047	17287027	0.896226
Chr1	11880001	11900000	0.4353		Chr5	5600001	5800000	3.5e-05		Chr16	11000001	11200001	0.00184		Chr1	17286217	17294440	0.0862612
Chr1	11900001	11920000	0.435		Chr5	5800001	6000000	7e-05		Chr16	11200001	11400001	0.00183		Chr1	17295411	17307953	0.778958
Chr1	11920001	11940000	0.4315		Chr5	6000001	6200000	1e-05		Chr16	11400001	11600001	0.002095		Chr1	17315366	17316616	0.769994
Chr1	11940001	11960000	0.4371		Chr5	6200001	6400000	4.5e-05		Chr16	11600001	11800001	0.00238		Chr1	17317722	17318538	0.699178
Chr1	11960001	11980000	0.4373		Chr5	6400001	6600000	2e-05		Chr16	11800001	12000001	0.00212		Chr1	17320580	17322389	0.903289
Chr1	11980001	12000000	0.4353		Chr5	6600001	6800000	1e-05		Chr16	12000001	12200001	0.001905		Chr1	17325427	17330967	0.955685
Chr1	12000001	12020000	0.4348		Chr5	6800001	7000000	3.5e-05		Chr16	12200001	12400001	0.00249		Chr1	17331839	17339847	0.602484
Chr1	12020001	12040000	0.4357		Chr5	7000001	7200000	8e-05		Chr16	12400001	12600001	0.002645		Chr1	17338782	17343340	0.264665
Chr1	12040001	12060000	0.4358		Chr5	7200001	7400000	4e-05		Chr16	12600001	12800001	0.00294		Chr1	17345464	17359549	0.137237
Chr1	12060001	12080000	0.4405		Chr5	7400001	7600000	1e-05		Chr16	12800001	13000001	0.00304		Chr1	17356832	17366657	0.47979
Chr1	12080001	12100000	0.4395		Chr5	7600001	7800000	1.5e-05		Chr16	13000001	13200001	0.002385		Chr1	17368143	17379225	0.779969
Chr1	12100001	12120000	0.4376		Chr5	7800001	8000000	4.5e-05		Chr16	13200001	13400001	0.00305		Chr1	17380018	17381891	0.342378
Chr1	12120001	12140000	0.4396		Chr5	8000001	8200000	8.5e-05		Chr16	13400001	13600001	0.003295		Chr1	17397718	17410722	0.0138837
Chr1	12140001	12160000	0.438		Chr5	8200001	8400000	6e-05		Chr16	13600001	13800001	0.00345		Chr1	17418198	17426658	0.865033
Chr1	12160001	12180000	0.4373		Chr5	8400001	8600000	2.5e-05		Chr16	13800001	14000001	0.003525		Chr1	17427640	17437344	0.845564
Chr1	12180001	12200000	0.437		Chr5	8600001	8800000	3.5e-05		Chr16	14000001	14200001	0.00303		Chr1	17438727	17457219	0.347688
Chr1	12200001	12220000	0.4374		Chr5	8800001	9000000	1.5e-05		Chr16	14200001	14400001	0.00343		Chr1	17461887	17468340	0.584789
Chr1	12220001	12240000	0.4379		Chr5	9000001	9200000	5e-05		Chr16	14400001	14600001	0.00364		Chr1	17472310	17475723	0.557458
Chr1	12240001	12260000	0.4397		Chr5	9200001	9400000	9e-05		Chr16	14600001	14659096	0.000875		Chr1	17476909	17482719	0.325782
Chr1	12260001	12280000	0.4365		Chr5	9400001	9600000	5.5e-05		Chr17	1	200001	0.00206		Chr1	17484643	17488055	0.81577
Chr1	12280001	12300000	0.4363		Chr5	9600001	9800000	2.5e-05		Chr17	200001	400001	0.002885		Chr1	17565855	17608836	0.618371
Chr1	12300001	12320000	0.4382		Chr5	9800001	10000000	6.5e-05		Chr17	400001	600001	0.00294		Chr1	17611419	17618686	0.383284
Chr1	12320001	12340000	0.4386		Chr5	10000001	10200000	2e-05		Chr17	600001	800001	0.002475		Chr1	17703522	17759383	0.579406
Chr1	12340001	12360000	0.4355		Chr5	10200001	10400000	3.5e-05		Chr17	800001	1000001	0.002255		Chr1	17765023	17768312	0.946009
Chr1	12360001	12380000	0.438		Chr5	10400001	10600000	7e-05		Chr17	1000001	1200001	0.002465		Chr1	17773863	17824193	0.491434
Chr1	12380001	12400000	0.4382		Chr5	10600001	10800000	5e-05		Chr17	1200001	1400001	0.00312		Chr1	17835054	17851484	0.0356136
Chr1	12400001	12420000	0.4383		Chr5	10800001	11000000	5.5e-05		Chr17	1400001	1600001	0.0027		Chr1	17852916	17859902	0.16769
Chr1	12420001	12440000	0.4373		Chr5	11000001	11200000	4.5e-05		Chr17	1600001	1800001	0.00272		Chr1	17861622	17864740	0.536247
Chr1	12440001	12460000	0.4348		Chr5	11200001	11400000	3e-05		Chr17	1800001	2000001	0.002935		Chr1	17867331	17871111	0.105265
Chr1	12460001	12480000	0.4363		Chr5	11400001	11600000	3e-05		Chr17	2000001	2200001	0.00193		Chr1	17882360	17925330	0.227087
Chr1	12480001	12500000	0.4346		Chr5	11600001	11800000	3.5e-05		Chr17	2200001	2400001	0.00231		Chr1	17927464	17934803	0.738766
Chr1	12500001	12520000	0.4318		Chr5	11800001	12000000	9.5e-05		Chr17	2400001	2600001	0.001975		Chr1	17934805	17938142	0.997743
Chr1	12520001	12540000	0.4299		Chr5	12000001	12200000	7e-05		Chr17	2600001	2800001	0.002295		Chr1	17939503	17940487	0.376705
Chr1	12540001	12560000	0.4298		Chr5	12200001	12400000	6.5e-05		Chr17	2800001	3000001	0.00282		Chr1	17940718	17944337	0.222612
Chr1	12560001	12580000	0.4278		Chr5	12400001	12600000	5.5e-05		Chr17	3000001	3200001	0.002415		Chr1	17944405	17946733	0.564503
Chr1	12580001	12600000	0.4254		Chr5	12600001	12800000	3.5e-05		Chr17	3200001	3400001	0.00172		Chr1	17947216	17951180	0.75788
Chr1	12600001	12620000	0.4257		Chr5	12800001	13000000	5e-06		Chr17	3400001	3600001	0.002375		Chr1	17960142	17998472	0.0207132
Chr1	12620001	12640000	0.4256		Chr5	13000001	13200000	3.5e-05		Chr17	3600001	3800001	0.00164		Chr1	18016113	18021465	0.543111
Chr1	12640001	12660000	0.4263		Chr5	13200001	13400000	4e-05		Chr17	3800001	4000001	0.00179		Chr1	18022299	18027352	0.217415
Chr1	12660001	12680000	0.4254		Chr5	13400001	13600000	2.5e-05		Chr17	4000001	4200001	0.001845		Chr1	18023621	18033161	0.0740385
Chr1	12680001	12700000	0.4265		Chr5	13600001	13800000	3e-05		Chr17	4200001	4400001	0.00217		Chr1	18033914	18046503	0.570631
Chr1	12700001	12720000	0.427		Chr5	13800001	14000000	4e-05		Chr17	4400001	4600001	0.00194		Chr1	18046966	18052541	0.788192
Chr1	12720001	12740000	0.4286		Chr5	14000001	14200000	3.5e-05		Chr17	4600001	4800001	0.001385		Chr1	18053452	18063910	0.713019
Chr1	12740001	12760000	0.4297		Chr5	14200001	14400000	4.5e-05		Chr17	4800001	5000001	0.002045		Chr1	18064071	18071238	0.220564
Chr1	12760001	12780000	0.4276		Chr5	14400001	14600000	7e-05		Chr17	5000001	5200001	0.00207		Chr1	18071971	18075085	0.824841
Chr1	12780001	12800000	0.4309		Chr5	14600001	14800000	4e-05		Chr17	5200001	5400001	0.00173		Chr1	18075623	18078807	0.849863
Chr1	12800001	12820000	0.4299		Chr5	14800001	15000000	5.5e-05		Chr17	5400001	5600001	0.001945		Chr1	18079384	18083051	0.45876
Chr1	12820001	12840000	0.4286		Chr5	15000001	15200000	7.5e-05		Chr17	5600001	5800001	0.00254		Chr1	18083709	18086366	0.0859422
Chr1	12840001	12860000	0.4296		Chr5	15200001	15400000	4.5e-05		Chr17	5800001	6000001	0.002185		Chr1	18086498	18096980	0.572979
Chr1	12860001	12880000	0.4296		Chr5	15400001	15600000	4.5e-05		Chr17	6000001	6200001	0.00225		Chr1	18148409	18179455	0.144574
Chr1	12880001	12900000	0.4385		Chr5	15600001	15800000	6.5e-05		Chr17	6200001	6400001	0.00196		Chr1	18184568	18190953	0.992431
Chr1	12900001	12920000	0.4387		Chr5	15800001	16000000	7.5e-05		Chr17	6400001	6600001	0.00223		Chr1	18191305	18197620	0.365827
Chr1	12920001	12940000	0.4351		Chr5	16000001	16200000	5.5e-05		Chr17	6600001	6800001	0.002175		Chr1	18199599	18205091	0.0912957
Chr1	12940001	12960000	0.4319		Chr5	16200001	16400000	5e-06		Chr17	6800001	7000001	0.001875		Chr1	18211323	18225730	0.529031
Chr1	12960001	12980000	0.4324		Chr5	16400001	16600000	3.5e-05		Chr17	7000001	7200001	0.00139		Chr1	18245873	18256864	0.387661
Chr1	12980001	13000000	0.4331		Chr5	16600001	16800000	1e-05		Chr17	7200001	7400001	0.001945		Chr1	18259863	18266444	0.890964
Chr1	13000001	13020000	0.4334		Chr5	16800001	17000000	2.5e-05		Chr17	7400001	7600001	0.00166		Chr1	18269556	18308839	0.118004
Chr1	13020001	13040000	0.4382		Chr5	17000001	17200000	1e-05		Chr17	7600001	7800001	0.00162		Chr1	18392844	18398351	0.163366
Chr1	13040001	13060000	0.4374		Chr5	17200001	17400000	4.5e-05		Chr17	7800001	8000001	0.001645		Chr1	18522694	18540925	0.686322
Chr1	13060001	13080000	0.4345		Chr5	17400001	17600000	5e-05		Chr17	8000001	8200001	0.002495		Chr1	18843151	18887527	0.71949
Chr1	13080001	13100000	0.4243		Chr5	17600001	17800000	4.5e-05		Chr17	8200001	8400001	0.001995		Chr1	18887794	18891562	0.129838
Chr1	13100001	13120000	0.4247		Chr5	17800001	18000000	3e-05		Chr17	8400001	8600001	0.00215		Chr1	18895733	18916229	0.719184
Chr1	13120001	13140000	0.424		Chr5	18000001	18200000	3.5e-05		Chr17	8600001	8800001	0.00215		Chr1	18917194	18942101	0.00125999
Chr1	13140001	13160000	0.4249		Chr5	18200001	18400000	1e-05		Chr17	8800001	9000001	0.00213		Chr1	18943657	18949678	0.154415
Chr1	13160001	13180000	0.4258		Chr5	18400001	18600000	5e-06		Chr17	9000001	9200001	0.00255		Chr1	18949695	18979721	0.331787
Chr1	13180001	13200000	0.4229		Chr5	18600001	18800000	1.5e-05		Chr17	9200001	9400001	0.002425		Chr1	18980702	18995720	0.261615
Chr1	13200001	13220000	0.4224		Chr5	18800001	19000000	1.5e-05		Chr17	9400001	9600001	0.00249		Chr1	18996939	19001716	0.867707
Chr1	13220001	13240000	0.4189		Chr5	19000001	19200000	1.5e-05		Chr17	9600001	9800001	0.002315		Chr1	19002588	19009692	0.00222467
Chr1	13240001	13260000	0.4187		Chr5	19200001	19400000	5e-06		Chr17	9800001	10000001	0.00224		Chr1	19010051	19019353	0.380101
Chr1	13260001	13280000	0.4208		Chr5	19400001	19600000	2e-05		Chr17	10000001	10200001	0.002685		Chr1	19021909	19043503	0.440399
Chr1	13280001	13300000	0.4206		Chr5	19600001	19800000	1e-05		Chr17	10200001	10400001	0.00209		Chr1	19049672	19053541	0.591867
Chr1	13300001	13320000	0.4198		Chr5	19800001	20000000	1.5e-05		Chr17	10400001	10600001	0.002375		Chr1	19055949	19081357	0.0136614
Chr1	13320001	13340000	0.4206		Chr6	1	200000	5e-05		Chr17	10600001	10800001	0.00188		Chr1	19081737	19089135	0.0415309
Chr1	13340001	13360000	0.4211		Chr6	200001	400000	4.5e-05		Chr17	10800001	11000001	0.00207		Chr1	19089413	19116409	0.231164
Chr1	13360001	13380000	0.4212		Chr6	400001	600000	8.5e-05		Chr17	11000001	11200001	0.00199		Chr1	19118304	19123660	0.212339
Chr1	13380001	13400000	0.421		Chr6	600001	800000	6e-05		Chr17	11200001	11400001	0.00206		Chr1	19126752	19132102	0.232219
Chr1	13400001	13420000	0.4214		Chr6	800001	1000000	2.5e-05		Chr17	11400001	11600001	0.00211		Chr1	19133214	19147170	0.686286
Chr1	13420001	13440000	0.4204		Chr6	1000001	1200000	2e-05		Chr17	11600001	11800001	0.002635		Chr1	19156056	19167110	0.428999
Chr1	13440001	13460000	0.4208		Chr6	1200001	1400000	7.5e-05		Chr17	11800001	12000001	0.002405		Chr1	19175708	19188620	0.409235
Chr1	13460001	13480000	0.424		Chr6	1400001	1600000	7e-05		Chr17	12000001	12200001	0.00157		Chr1	19193739	19194521	0.733047
Chr1	13480001	13500000	0.43		Chr6	1600001	1800000	7e-05		Chr17	12200001	12400001	0.001405		Chr1	19197969	19213529	0.126775
Chr1	13500001	13520000	0.4298		Chr6	1800001	2000000	7e-05		Chr17	12400001	12600001	0.001965		Chr1	19213920	19219278	0.909363
Chr1	13520001	13540000	0.431		Chr6	2000001	2200000	5.5e-05		Chr17	12600001	12800001	0.00216		Chr1	19220352	19229723	0.940603
Chr1	13540001	13560000	0.4304		Chr6	2200001	2400000	0		Chr17	12800001	13000001	0.00196		Chr1	19231127	19234681	0.405346
Chr1	13560001	13580000	0.4296		Chr6	2400001	2600000	5e-06		Chr17	13000001	13200001	0.0025		Chr1	19236134	19254895	0.517798
Chr1	13580001	13600000	0.4307		Chr6	2600001	2800000	5e-06		Chr17	13200001	13400001	0.00213		Chr1	19258937	19267461	0.699146
Chr1	13600001	13620000	0.4304		Chr6	2800001	3000000	3e-05		Chr17	13400001	13600001	0.002265		Chr1	19269420	19274778	0.538821
Chr1	13620001	13640000	0.4297		Chr6	3000001	3200000	7e-05		Chr17	13600001	13800001	0.001945		Chr1	19276801	19280561	0.330746
Chr1	13640001	13660000	0.4296		Chr6	3200001	3400000	1e-05		Chr17	13800001	14000001	0.001965		Chr1	19281250	19287568	0.410524
Chr1	13660001	13680000	0.4289		Chr6	3400001	3600000	4e-05		Chr17	14000001	14200001	0.001525		Chr1	19292175	19373522	0.922911
Chr1	13680001	13700000	0.4221		Chr6	3600001	3800000	1.5e-05		Chr17	14200001	14400001	0.001665		Chr1	19375223	19380244	0.689451
Chr1	13700001	13720000	0.4233		Chr6	3800001	4000000	4.5e-05		Chr17	14400001	14600001	0.001625		Chr1	19381710	19387001	0.955987
Chr1	13720001	13740000	0.4247		Chr6	4000001	4200000	5e-05		Chr17	14600001	14800001	0.00139		Chr1	19387163	19390404	0.998046
Chr1	13740001	13760000	0.4259		Chr6	4200001	4400000	6.5e-05		Chr17	14800001	15000001	0.001615		Chr1	19601146	19604402	0.618998
Chr1	13760001	13780000	0.4261		Chr6	4400001	4600000	9e-05		Chr17	15000001	15200001	0.00183		Chr1	19622028	19629389	0.824286
Chr1	13780001	13800000	0.4248		Chr6	4600001	4800000	8e-05		Chr17	15200001	15400001	0.00138		Chr1	19636809	19659106	0.350468
Chr1	13800001	13820000	0.4246		Chr6	4800001	5000000	5.5e-05		Chr17	15400001	15600001	0.00207		Chr1	19660891	19666586	0.214889
Chr1	13820001	13840000	0.4254		Chr6	5000001	5200000	2.5e-05		Chr17	15600001	15800001	0.0019		Chr1	19667344	19688645	0.00765312
Chr1	13840001	13860000	0.4243		Chr6	5200001	5400000	2.5e-05		Chr17	15800001	16000001	0.002005		Chr1	19709496	19721194	0.233017
Chr1	13860001	13880000	0.4217		Chr6	5400001	5600000	1e-05		Chr17	16000001	16200001	0.001985		Chr1	19723846	19735654	0.513287
Chr1	13880001	13900000	0.4241		Chr6	5600001	5800000	3e-05		Chr17	16200001	16400001	0.001875		Chr1	19742415	19746939	0.716548
Chr1	13900001	13920000	0.4229		Chr6	5800001	6000000	9.5e-05		Chr17	16400001	16600001	0.002125		Chr1	19748317	19753320	0.590517
Chr1	13920001	13940000	0.4207		Chr6	6000001	6200000	6.5e-05		Chr17	16600001	16800001	0.00196		Chr1	19755983	19760588	0.96536
Chr1	13940001	13960000	0.4203		Chr6	6200001	6400000	3e-05		Chr17	16800001	17000001	0.00194		Chr1	19770852	19838697	0.685025
Chr1	13960001	13980000	0.4207		Chr6	6400001	6600000	5e-05		Chr17	17000001	17200001	0.00183		Chr1	20122675	20127066	0.0987415
Chr1	13980001	14000000	0.4228		Chr6	6600001	6800000	5e-06		Chr17	17200001	17400001	0.001975		Chr1	20130599	20136342	0.263126
Chr1	14000001	14020000	0.424		Chr6	6800001	7000000	4.5e-05		Chr17	17400001	17600001	0.00186		Chr1	20137786	20150738	0.0307768
Chr1	14020001	14040000	0.4236		Chr6	7000001	7200000	7e-05		Chr17	17600001	17800001	0.00165		Chr1	20154178	20191085	0.98972
Chr1	14040001	14060000	0.4228		Chr6	7200001	7400000	4e-05		Chr17	17800001	18000001	0.00198		Chr1	20191272	20211204	0.273153
Chr1	14060001	14080000	0.4238		Chr6	7400001	7600000	2.5e-05		Chr17	18000001	18200001	0.00241		Chr1	20211711	20227958	0.737899
Chr1	14080001	14100000	0.4247		Chr6	7600001	7800000	6e-05		Chr17	18200001	18400001	0.00169		Chr1	20281144	20298000	0.7611
Chr1	14100001	14120000	0.4244		Chr6	7800001	8000000	4.5e-05		Chr17	18400001	18600001	0.001805		Chr1	20298911	20309097	0.442292
Chr1	14120001	14140000	0.4259		Chr6	8000001	8200000	3e-05		Chr17	18600001	18800001	0.001585		Chr1	20311559	20313862	0.0458598
Chr1	14140001	14160000	0.4259		Chr6	8200001	8400000	6e-05		Chr17	18800001	19000001	0.0017		Chr1	20317548	20323141	0.68488
Chr1	14160001	14180000	0.4268		Chr6	8400001	8600000	5e-05		Chr17	19000001	19200001	0.00176		Chr1	20327248	20343781	0.699689
Chr1	14180001	14200000	0.4271		Chr6	8600001	8800000	3.5e-05		Chr17	19200001	19400001	0.001365		Chr1	20344470	20350484	0.0684239
Chr1	14200001	14220000	0.4275		Chr6	8800001	9000000	3e-05		Chr17	19400001	19600001	0.001135		Chr1	20353930	20365392	0.283961
Chr1	14220001	14240000	0.4289		Chr6	9000001	9200000	1.5e-05		Chr17	19600001	19800001	0.001445		Chr1	20365643	20370365	0.0178548
Chr1	14240001	14260000	0.4288		Chr6	9200001	9400000	1e-05		Chr17	19800001	20000001	0.002825		Chr1	20372014	20383778	0.979849
Chr1	14260001	14280000	0.4264		Chr6	9400001	9600000	8.5e-05		Chr17	20000001	20200001	0.002885		Chr1	20391985	20401737	0.702182
Chr1	14280001	14300000	0.4254		Chr6	9600001	9800000	5.5e-05		Chr17	20200001	20400001	0.002905		Chr1	20402282	20415609	0.891757
Chr1	14300001	14320000	0.4274		Chr6	9800001	10000000	5.5e-05		Chr17	20400001	20600001	0.003025		Chr1	20421009	20456368	0.493791
Chr1	14320001	14340000	0.4274		Chr6	10000001	10200000	6e-05		Chr17	20600001	20800001	0.00302		Chr1	20459035	20469759	0.247135
Chr1	14340001	14360000	0.431		Chr6	10200001	10400000	3.5e-05		Chr17	20800001	21000001	0.0031		Chr1	20470993	20477892	0.759212
Chr1	14360001	14380000	0.4312		Chr6	10400001	10600000	7e-05		Chr17	21000001	21200001	0.002885		Chr1	20479633	20512112	0.229074
Chr1	14380001	14400000	0.432		Chr6	10600001	10800000	3e-05		Chr17	21200001	21400001	0.00325		Chr1	20513694	20516511	0.312568
Chr1	14400001	14420000	0.4327		Chr6	10800001	11000000	4.5e-05		Chr17	21400001	21600001	0.003185		Chr1	20517690	20531368	0.60422
Chr1	14420001	14440000	0.431		Chr6	11000001	11200000	3e-05		Chr17	21600001	21800001	0.003395		Chr1	20540243	20557760	0.77425
Chr1	14440001	14460000	0.4338		Chr6	11200001	11400000	0		Chr17	21800001	22000001	0.00372		Chr1	20558344	20565389	0.382937
Chr1	14460001	14480000	0.4346		Chr6	11400001	11600000	1e-05		Chr17	22000001	22200001	0.00373		Chr1	20567675	20577372	0.106232
Chr1	14480001	14500000	0.434		Chr6	11600001	11800000	1.5e-05		Chr17	22200001	22400001	0.002765		Chr1	20578868	20585869	0.78303
Chr1	14500001	14520000	0.4329		Chr6	11800001	12000000	3e-05		Chr17	22400001	22600001	0.00345		Chr1	20643147	20658337	0.153067
Chr1	14520001	14540000	0.4326		Chr6	12000001	12200000	3.5e-05		Chr17	22600001	22800001	0.00277		Chr1	20662833	20670996	0.158193
Chr1	14540001	14560000	0.4292		Chr6	12200001	12400000	2e-05		Chr17	22800001	23000001	0.00246		Chr1	20674434	20682432	0.984946
Chr1	14560001	14580000	0.4274		Chr6	12400001	12600000	1e-05		Chr17	23000001	23001425	1e-05		Chr1	20683026	20754473	0.106319
Chr1	14580001	14600000	0.4255		Chr6	12600001	12800000	5e-06		Chr18	1	200001	0.00221		Chr1	20792360	20802606	0.254648
Chr1	14600001	14620000	0.4238		Chr6	12800001	13000000	6.5e-05		Chr18	200001	400001	0.002625		Chr1	20805656	20855434	0.497397
Chr1	14620001	14640000	0.424		Chr6	13000001	13200000	0.000215		Chr18	400001	600001	0.002155		Chr1	20855817	20859889	0.354168
Chr1	14640001	14660000	0.4223		Chr6	13200001	13400000	9e-05		Chr18	600001	800001	0.002525		Chr1	20857786	20876371	0.237137
Chr1	14660001	14680000	0.4214		Chr6	13400001	13600000	9e-05		Chr18	800001	1000001	0.00263		Chr1	20877303	20885933	0.2865
Chr1	14680001	14700000	0.4212		Chr6	13600001	13800000	7e-05		Chr18	1000001	1200001	0.00248		Chr1	20892430	20898628	0.507854
Chr1	14700001	14720000	0.4234		Chr6	13800001	14000000	4.5e-05		Chr18	1200001	1400001	0.00277		Chr1	20905067	20929175	0.361796
Chr1	14720001	14740000	0.4222		Chr6	14000001	14200000	7e-05		Chr18	1400001	1600001	0.002835		Chr1	20931816	20938993	0.377351
Chr1	14740001	14760000	0.4218		Chr6	14200001	14400000	5.5e-05		Chr18	1600001	1800001	0.0029		Chr1	20935503	20942790	0.0773311
Chr1	14760001	14780000	0.4231		Chr6	14400001	14600000	6.5e-05		Chr18	1800001	2000001	0.00273		Chr1	21062668	21089863	0.36654
Chr1	14780001	14800000	0.4223		Chr6	14600001	14800000	5.5e-05		Chr18	2000001	2200001	0.00259		Chr1	21115474	21131187	0.78656
Chr1	14800001	14820000	0.4216		Chr6	14800001	15000000	8e-05		Chr18	2200001	2400001	0.002655		Chr1	21136980	21139756	0.622774
Chr1	14820001	14840000	0.4242		Chr6	15000001	15200000	7e-05		Chr18	2400001	2600001	0.002945		Chr1	21160362	21174470	0.363068
Chr1	14840001	14860000	0.4252		Chr6	15200001	15400000	5.5e-05		Chr18	2600001	2800001	0.002775		Chr1	21178428	21179647	0.998872
Chr1	14860001	14880000	0.4242		Chr6	15400001	15600000	1e-05		Chr18	2800001	3000001	0.002475		Chr1	21184390	21187579	1
Chr1	14880001	14900000	0.4235		Chr6	15600001	15800000	8.5e-05		Chr18	3000001	3200001	0.00127		Chr1	21189888	21205484	0.33158
Chr1	14900001	14920000	0.4209		Chr6	15800001	16000000	6e-05		Chr18	3200001	3400001	0.001315		Chr1	21207907	21213430	0.101076
Chr1	14920001	14940000	0.4199		Chr6	16000001	16200000	3e-05		Chr18	3400001	3600001	0.001045		Chr1	21220345	21230324	0.297108
Chr1	14940001	14960000	0.4202		Chr6	16200001	16400000	2e-05		Chr18	3600001	3800001	0.001725		Chr1	21234530	21270403	0.414562
Chr1	14960001	14980000	0.4187		Chr6	16400001	16600000	2.5e-05		Chr18	3800001	4000001	0.002185		Chr1	21275008	21283635	0.661663
Chr1	14980001	15000000	0.4196		Chr6	16600001	16800000	3.5e-05		Chr18	4000001	4200001	0.00168		Chr1	21283977	21332597	0.685533
Chr1	15000001	15020000	0.4173		Chr6	16800001	17000000	3e-05		Chr18	4200001	4400001	0.002065		Chr1	21334281	21335872	0.0566566
Chr1	15020001	15040000	0.414		Chr6	17000001	17200000	5e-05		Chr18	4400001	4600001	0.001685		Chr1	21337597	21346202	0.589315
Chr1	15040001	15060000	0.4137		Chr6	17200001	17400000	6e-05		Chr18	4600001	4800001	0.001885		Chr1	21346489	21348575	0.662106
Chr1	15060001	15080000	0.4173		Chr6	17400001	17600000	1e-05		Chr18	4800001	5000001	0.00158		Chr1	21430238	21441431	0.948021
Chr1	15080001	15100000	0.4182		Chr6	17600001	17800000	2e-05		Chr18	5000001	5200001	0.00181		Chr1	21504041	21508387	0.213983
Chr1	15100001	15120000	0.42		Chr6	17800001	18000000	5e-05		Chr18	5200001	5400001	0.00232		Chr1	21508966	21524549	0.0390219
Chr1	15120001	15140000	0.4215		Chr6	18000001	18200000	5e-05		Chr18	5400001	5600001	0.001855		Chr1	21522020	21529262	0.697062
Chr1	15140001	15160000	0.4211		Chr6	18200001	18400000	6e-05		Chr18	5600001	5800001	0.00158		Chr1	21529258	21539378	0.165594
Chr1	15160001	15180000	0.4216		Chr6	18400001	18600000	5.5e-05		Chr18	5800001	6000001	0.001865		Chr1	21541087	21635798	0.00110019
Chr1	15180001	15200000	0.4223		Chr6	18600001	18800000	5.5e-05		Chr18	6000001	6200001	0.00178		Chr1	21680964	21690871	0.0803728
Chr1	15200001	15220000	0.4274		Chr6	18800001	19000000	8.5e-05		Chr18	6200001	6400001	0.002455		Chr1	21708979	21806176	0.6609
Chr1	15220001	15240000	0.4293		Chr6	19000001	19200000	3.5e-05		Chr18	6400001	6600001	0.002		Chr1	21817693	21834017	0.675289
Chr1	15240001	15260000	0.4261		Chr6	19200001	19400000	2.5e-05		Chr18	6600001	6800001	0.001765		Chr1	21837540	21849341	0.818857
Chr1	15260001	15280000	0.4252		Chr6	19400001	19600000	3.5e-05		Chr18	6800001	7000001	0.0021		Chr1	21851233	21868133	0.0675635
Chr1	15280001	15300000	0.4244		Chr6	19600001	19800000	9e-05		Chr18	7000001	7200001	0.001915		Chr1	21880919	21888597	0.312854
Chr1	15300001	15320000	0.4223		Chr6	19800001	20000000	5e-05		Chr18	7200001	7400001	0.00197		Chr1	21891816	21898522	0.0806743
Chr1	15320001	15340000	0.4206		Chr6	20000001	20200000	4.5e-05		Chr18	7400001	7600001	0.001645		Chr1	21899190	21902311	0.931605
Chr1	15340001	15360000	0.4196		Chr6	20200001	20400000	5e-05		Chr18	7600001	7800001	0.001805		Chr1	21903990	21913871	0.63052
Chr1	15360001	15380000	0.4183		Chr6	20400001	20600000	3.5e-05		Chr18	7800001	8000001	0.001935		Chr1	21916411	21921325	0.792034
Chr1	15380001	15400000	0.4164		Chr6	20600001	20800000	2.5e-05		Chr18	8000001	8200001	0.00227		Chr1	21925420	21930499	0.100402
Chr1	15400001	15420000	0.4157		Chr6	20800001	21000000	3.5e-05		Chr18	8200001	8400001	0.001975		Chr1	21931266	21938394	0.529565
Chr1	15420001	15440000	0.4156		Chr6	21000001	21200000	1.5e-05		Chr18	8400001	8600001	0.00235		Chr1	21938538	21951763	0.871759
Chr1	15440001	15460000	0.4181		Chr6	21200001	21400000	6e-05		Chr18	8600001	8800001	0.002065		Chr1	21953136	21962930	0.132552
Chr1	15460001	15480000	0.4183		Chr6	21400001	21600000	6e-05		Chr18	8800001	9000001	0.00221		Chr1	21993046	22004011	0.50216
Chr1	15480001	15500000	0.42		Chr6	21600001	21800000	5e-06		Chr18	9000001	9200001	0.002045		Chr1	21996016	21998072	0.0612411
Chr1	15500001	15520000	0.42		Chr7	1	200000	5.5e-05		Chr18	9200001	9400001	0.002025		Chr1	22004609	22017079	0.0278409
Chr1	15520001	15540000	0.4205		Chr7	200001	400000	2.5e-05		Chr18	9400001	9600001	0.002365		Chr1	22020695	22025861	0.0174705
Chr1	15540001	15560000	0.4215		Chr7	400001	600000	1e-05		Chr18	9600001	9800001	0.002185		Chr1	22086957	22094429	0.665328
Chr1	15560001	15580000	0.4223		Chr7	600001	800000	6.5e-05		Chr18	9800001	10000001	0.00235		Chr1	22104346	22108920	0.249646
Chr1	15580001	15600000	0.4234		Chr7	800001	1000000	6.5e-05		Chr18	10000001	10200001	0.00244		Chr1	22119079	22129781	0.293054
Chr1	15600001	15620000	0.423		Chr7	1000001	1200000	2e-05		Chr18	10200001	10400001	0.002825		Chr1	22135427	22140140	0.988604
Chr1	15620001	15640000	0.4226		Chr7	1200001	1400000	5e-06		Chr18	10400001	10600001	0.002495		Chr1	22141014	22158109	0.567631
Chr1	15640001	15660000	0.4235		Chr7	1400001	1600000	5e-05		Chr18	10600001	10800001	0.00228		Chr1	22158198	22164180	0.380554
Chr1	15660001	15680000	0.4244		Chr7	1600001	1800000	3e-05		Chr18	10800001	11000001	0.00248		Chr1	22160903	22203677	0.542063
Chr1	15680001	15700000	0.4227		Chr7	1800001	2000000	4.5e-05		Chr18	11000001	11200001	0.00231		Chr1	22217029	22221571	0.117617
Chr1	15700001	15720000	0.424		Chr7	2000001	2200000	5e-06		Chr18	11200001	11400001	0.00172		Chr1	22245913	22260713	0.851156
Chr1	15720001	15740000	0.425		Chr7	2200001	2400000	3e-05		Chr18	11400001	11600001	0.0021		Chr1	22268080	22283994	0.380259
Chr1	15740001	15760000	0.4262		Chr7	2400001	2600000	4e-05		Chr18	11600001	11800001	0.00217		Chr1	22284009	22293230	0.494865
Chr1	15760001	15780000	0.4285		Chr7	2600001	2800000	8.5e-05		Chr18	11800001	12000001	0.002265		Chr1	22293889	22302952	0.955799
Chr1	15780001	15800000	0.4279		Chr7	2800001	3000000	1.5e-05		Chr18	12000001	12200001	0.002315		Chr1	22307027	22311519	0.219421
Chr1	15800001	15820000	0.4294		Chr7	3000001	3200000	1.5e-05		Chr18	12200001	12400001	0.00236		Chr1	22320592	22321211	0.0136615
Chr1	15820001	15840000	0.4292		Chr7	3200001	3400000	3.5e-05		Chr18	12400001	12600001	0.002275		Chr1	22324124	22328912	0.268324
Chr1	15840001	15860000	0.4283		Chr7	3400001	3600000	2.5e-05		Chr18	12600001	12800001	0.00193		Chr1	22329735	22335059	0.279871
Chr1	15860001	15880000	0.4253		Chr7	3600001	3800000	1.5e-05		Chr18	12800001	13000001	0.002265		Chr1	22381039	22416360	0.963501
Chr1	15880001	15900000	0.4272		Chr7	3800001	4000000	8e-05		Chr18	13000001	13200001	0.001995		Chr1	22416901	22431495	0.0578931
Chr1	15900001	15920000	0.4269		Chr7	4000001	4200000	4.5e-05		Chr18	13200001	13400001	0.002225		Chr1	22431951	22444226	0.997477
Chr1	15920001	15940000	0.4263		Chr7	4200001	4400000	6e-05		Chr18	13400001	13600001	0.001975		Chr1	22443861	22447540	0.269044
Chr1	15940001	15960000	0.4249		Chr7	4400001	4600000	6e-05		Chr18	13600001	13800001	0.0023		Chr1	22449461	22454638	0.665908
Chr1	15960001	15980000	0.4256		Chr7	4600001	4800000	3.5e-05		Chr18	13800001	14000001	0.002115		Chr1	22456210	22459624	0.809184
Chr1	15980001	16000000	0.43		Chr7	4800001	5000000	2e-05		Chr18	14000001	14200001	0.00196		Chr1	22461051	22462920	0.175801
Chr1	16000001	16020000	0.4268		Chr7	5000001	5200000	3.5e-05		Chr18	14200001	14400001	0.00199		Chr1	22463520	22471654	0.99563
Chr1	16020001	16040000	0.4277		Chr7	5200001	5400000	2e-05		Chr18	14400001	14600001	0.00211		Chr1	22471790	22473873	0.123146
Chr1	16040001	16060000	0.4271		Chr7	5400001	5600000	4e-05		Chr18	14600001	14800001	0.001755		Chr1	22483040	22486697	0.694217
Chr1	16060001	16080000	0.4286		Chr7	5600001	5800000	1.5e-05		Chr18	14800001	15000001	0.001735		Chr1	22486452	22487252	0.26404
Chr1	16080001	16100000	0.4289		Chr7	5800001	6000000	3.5e-05		Chr18	15000001	15200001	0.001745		Chr1	22488032	22491644	0.899112
Chr1	16100001	16120000	0.4269		Chr7	6000001	6200000	1.5e-05		Chr18	15200001	15400001	0.00161		Chr1	22494929	22519275	0.561688
Chr1	16120001	16140000	0.4275		Chr7	6200001	6400000	0		Chr18	15400001	15600001	0.00241		Chr1	22539632	22570069	0.656779
Chr1	16140001	16160000	0.4272		Chr7	6400001	6600000	1e-05		Chr18	15600001	15800001	0.00236		Chr1	22576150	22582135	0.0889117
Chr1	16160001	16180000	0.4287		Chr7	6600001	6800000	1.5e-05		Chr18	15800001	16000001	0.0024		Chr1	22585643	22604098	0.0665363
Chr1	16180001	16200000	0.4246		Chr7	6800001	7000000	7e-05		Chr18	16000001	16200001	0.002315		Chr1	22606941	22614205	0.0243582
Chr1	16200001	16220000	0.4254		Chr7	7000001	7200000	9.5e-05		Chr18	16200001	16400001	0.0027		Chr1	22614540	22624764	0.990035
Chr1	16220001	16240000	0.425		Chr7	7200001	7400000	0.000155		Chr18	16400001	16600001	0.00201		Chr1	22625552	22630310	0.676145
Chr1	16240001	16260000	0.4256		Chr7	7400001	7600000	0.000105		Chr18	16600001	16800001	0.002415		Chr1	22631191	22646532	0.870381
Chr1	16260001	16280000	0.4249		Chr7	7600001	7800000	5e-05		Chr18	16800001	17000001	0.00227		Chr1	22653117	22670818	0.000777834
Chr1	16280001	16300000	0.4235		Chr7	7800001	8000000	6e-05		Chr18	17000001	17200001	0.00179		Chr1	22674209	22714475	0.514541
Chr1	16300001	16320000	0.4249		Chr7	8000001	8200000	7e-05		Chr18	17200001	17400001	0.001675		Chr1	22729070	22751920	0.800203
Chr1	16320001	16340000	0.4258		Chr7	8200001	8400000	5.5e-05		Chr18	17400001	17600001	0.002565		Chr1	22791949	22815313	0.206171
Chr1	16340001	16360000	0.4242		Chr7	8400001	8600000	7.5e-05		Chr18	17600001	17800001	0.002585		Chr1	22815969	22822597	0.84525
Chr1	16360001	16380000	0.4207		Chr7	8600001	8800000	3e-05		Chr18	17800001	18000001	0.00229		Chr1	22830595	22842527	0.365287
Chr1	16380001	16400000	0.4204		Chr7	8800001	9000000	5.5e-05		Chr18	18000001	18200001	0.003075		Chr1	22844666	22847444	0.00247224
Chr1	16400001	16420000	0.4194		Chr7	9000001	9200000	3.5e-05		Chr18	18200001	18400001	0.002145		Chr1	22849389	22878441	0.0510507
Chr1	16420001	16440000	0.4186		Chr7	9200001	9400000	5.5e-05		Chr18	18400001	18600001	0.00257		Chr1	22881963	22891359	0.138752
Chr1	16440001	16460000	0.4181		Chr7	9400001	9600000	5e-05		Chr18	18600001	18800001	0.003415		Chr1	22881963	22899454	0.891717
Chr1	16460001	16480000	0.4203		Chr7	9600001	9800000	0.00012		Chr18	18800001	19000001	0.002895		Chr1	22900566	22909840	0.319793
Chr1	16480001	16500000	0.4204		Chr7	9800001	10000000	6.5e-05		Chr18	19000001	19200001	0.003225		Chr1	22957359	22964547	0.109346
Chr1	16500001	16520000	0.4192		Chr7	10000001	10200000	0.000105		Chr18	19200001	19400001	0.003165		Chr1	22966984	22976242	0.0646333
Chr1	16520001	16540000	0.417		Chr7	10200001	10400000	0.00011		Chr18	19400001	19600001	0.003285		Chr1	22978925	22993354	0.217843
Chr1	16540001	16560000	0.4192		Chr7	10400001	10600000	6.5e-05		Chr18	19600001	19800001	0.003265		Chr1	23001133	23045814	0.325566
Chr1	16560001	16580000	0.4175		Chr7	10600001	10800000	0.000115		Chr18	19800001	20000001	0.003345		Chr1	23046617	23052196	0.564858
Chr1	16580001	16600000	0.4174		Chr7	10800001	11000000	8e-05		Chr18	20000001	20200001	0.00353		Chr1	23053369	23072960	0.587456
Chr1	16600001	16620000	0.4171		Chr7	11000001	11200000	5e-05		Chr18	20200001	20400001	0.003265		Chr1	23074670	23087103	0.597322
Chr1	16620001	16640000	0.416		Chr7	11200001	11400000	7e-05		Chr18	20400001	20600001	0.00267		Chr1	23091274	23099906	0.246501
Chr1	16640001	16660000	0.4153		Chr7	11400001	11600000	6.5e-05		Chr18	20600001	20726299	0.001825		Chr1	23101137	23115189	0.259777
Chr1	16660001	16680000	0.4129		Chr7	11600001	11800000	2e-05		Chr19	1	200001	0.00341		Chr1	23116991	23121009	0.395685
Chr1	16680001	16700000	0.4103		Chr7	11800001	12000000	2e-05		Chr19	200001	400001	0.00274		Chr1	23124836	23128450	0.47591
Chr1	16700001	16720000	0.4097		Chr7	12000001	12200000	1e-05		Chr19	400001	600001	0.003095		Chr1	23140681	23143732	0.641831
Chr1	16720001	16740000	0.4114		Chr7	12200001	12400000	2.5e-05		Chr19	600001	800001	0.002935		Chr1	23148583	23150248	0.0712253
Chr1	16740001	16760000	0.4112		Chr7	12400001	12600000	6e-05		Chr19	800001	1000001	0.003205		Chr1	23150550	23154679	0.414122
Chr1	16760001	16780000	0.4124		Chr7	12600001	12800000	2.5e-05		Chr19	1000001	1200001	0.00267		Chr1	23170488	23172222	0.226851
Chr1	16780001	16800000	0.4131		Chr7	12800001	13000000	2e-05		Chr19	1200001	1400001	0.003055		Chr1	23179111	23180264	0.375565
Chr1	16800001	16820000	0.4157		Chr7	13000001	13200000	5.5e-05		Chr19	1400001	1600001	0.00271		Chr1	23184279	23186979	0.937971
Chr1	16820001	16840000	0.4165		Chr7	13200001	13400000	6.5e-05		Chr19	1600001	1800001	0.00282		Chr1	23192958	23194723	0.714337
Chr1	16840001	16860000	0.4172		Chr7	13400001	13600000	2e-05		Chr19	1800001	2000001	0.00321		Chr1	23201960	23210089	0.652993
Chr1	16860001	16880000	0.4167		Chr7	13600001	13800000	7.5e-05		Chr19	2000001	2200001	0.003245		Chr1	23210454	23216871	0.381871
Chr1	16880001	16900000	0.4177		Chr7	13800001	14000000	6e-05		Chr19	2200001	2400001	0.003075		Chr1	23218230	23225878	0.789448
Chr1	16900001	16920000	0.4166		Chr7	14000001	14200000	1.5e-05		Chr19	2400001	2600001	0.00326		Chr1	23226554	23237670	0.336875
Chr1	16920001	16940000	0.4182		Chr7	14200001	14400000	8.5e-05		Chr19	2600001	2800001	0.00306		Chr1	23242102	23272259	0.501514
Chr1	16940001	16960000	0.4179		Chr7	14400001	14600000	4.5e-05		Chr19	2800001	3000001	0.001775		Chr1	23277517	23295540	0.00406054
Chr1	16960001	16980000	0.4147		Chr7	14600001	14800000	6.5e-05		Chr19	3000001	3200001	0.002455		Chr1	23300741	23302895	0.171884
Chr1	16980001	17000000	0.4134		Chr7	14800001	15000000	7e-05		Chr19	3200001	3400001	0.00235		Chr1	23345777	23377019	0.337197
Chr1	17000001	17020000	0.4111		Chr7	15000001	15200000	6e-05		Chr19	3400001	3600001	0.003065		Chr1	23379357	23382488	0.67278
Chr1	17020001	17040000	0.4123		Chr7	15200001	15400000	4e-05		Chr19	3600001	3800001	0.00253		Chr1	23383116	23386794	0.717935
Chr1	17040001	17060000	0.4103		Chr7	15400001	15600000	1.5e-05		Chr19	3800001	4000001	0.002445		Chr1	23387405	23394222	0.520061
Chr1	17060001	17080000	0.4112		Chr7	15600001	15800000	4e-05		Chr19	4000001	4200001	0.00232		Chr1	23395054	23401638	0.965748
Chr1	17080001	17100000	0.4113		Chr7	15800001	16000000	6.5e-05		Chr19	4200001	4400001	0.003005		Chr1	23401990	23408655	0.0183894
Chr1	17100001	17120000	0.4124		Chr7	16000001	16200000	0.00011		Chr19	4400001	4600001	0.002565		Chr1	23410676	23420897	0.545369
Chr1	17120001	17140000	0.4085		Chr7	16200001	16400000	1.5e-05		Chr19	4600001	4800001	0.00324		Chr1	23421016	23425917	0.626571
Chr1	17140001	17160000	0.408		Chr7	16400001	16600000	8e-05		Chr19	4800001	5000001	0.00272		Chr1	23426942	23432652	0.426957
Chr1	17160001	17180000	0.4117		Chr7	16600001	16800000	2e-05		Chr19	5000001	5200001	0.003485		Chr1	23434001	23435050	0.901661
Chr1	17180001	17200000	0.4112		Chr7	16800001	17000000	0		Chr19	5200001	5400001	0.003185		Chr1	23440465	23448730	0.0187972
Chr1	17200001	17220000	0.4114		Chr7	17000001	17200000	5e-06		Chr19	5400001	5600001	0.00285		Chr1	23453325	23516007	0.178432
Chr1	17220001	17240000	0.4109		Chr7	17200001	17400000	2e-05		Chr19	5600001	5800001	0.002065		Chr1	23517185	23526790	0.846107
Chr1	17240001	17260000	0.4126		Chr7	17400001	17600000	2e-05		Chr19	5800001	6000001	0.00197		Chr1	23554694	23557183	0.0679286
Chr1	17260001	17280000	0.4101		Chr7	17600001	17800000	6.5e-05		Chr19	6000001	6200001	0.00197		Chr1	23558007	23560759	0.980853
Chr1	17280001	17300000	0.4098		Chr7	17800001	18000000	4e-05		Chr19	6200001	6400001	0.001745		Chr1	23561790	23584454	0.203701
Chr1	17300001	17320000	0.4098		Chr7	18000001	18200000	0		Chr19	6400001	6600001	0.00201		Chr1	23593380	23597982	0.181249
Chr1	17320001	17340000	0.4099		Chr8	1	200000	7.5e-05		Chr19	6600001	6800001	0.00184		Chr1	23598901	23602884	0.75102
Chr1	17340001	17360000	0.4104		Chr8	200001	400000	9e-05		Chr19	6800001	7000001	0.001515		Chr1	23606085	23615994	0.653111
Chr1	17360001	17380000	0.4091		Chr8	400001	600000	2.5e-05		Chr19	7000001	7200001	0.001705		Chr1	23616520	23621312	0.246195
Chr1	17380001	17400000	0.4085		Chr8	600001	800000	2e-05		Chr19	7200001	7400001	0.00202		Chr1	23621646	23629839	0.124847
Chr1	17400001	17420000	0.4077		Chr8	800001	1000000	1e-05		Chr19	7400001	7600001	0.001745		Chr1	23630996	23643351	0.84333
Chr1	17420001	17440000	0.4088		Chr8	1000001	1200000	3e-05		Chr19	7600001	7800001	0.00164		Chr1	23644416	23655908	0.260656
Chr1	17440001	17460000	0.4092		Chr8	1200001	1400000	0.00013		Chr19	7800001	8000001	0.00159		Chr1	23699859	23702852	0.893894
Chr1	17460001	17480000	0.4122		Chr8	1400001	1600000	6.5e-05		Chr19	8000001	8200001	0.002095		Chr1	23868327	23920503	0.00749692
Chr1	17480001	17500000	0.415		Chr8	1600001	1800000	1.5e-05		Chr19	8200001	8400001	0.00147		Chr1	23962884	23965840	0.824247
Chr1	17500001	17520000	0.416		Chr8	1800001	2000000	8e-05		Chr19	8400001	8600001	0.001575		Chr1	23965826	23979943	0.0447605
Chr1	17520001	17540000	0.4194		Chr8	2000001	2200000	8.5e-05		Chr19	8600001	8800001	0.00151		Chr1	23980611	23988963	0.381196
Chr1	17540001	17560000	0.4213		Chr8	2200001	2400000	5.5e-05		Chr19	8800001	9000001	0.001885		Chr1	23989400	23993578	0.35517
Chr1	17560001	17580000	0.4249		Chr8	2400001	2600000	3e-05		Chr19	9000001	9200001	0.001905		Chr1	23994988	24013840	0.457107
Chr1	17580001	17600000	0.4261		Chr8	2600001	2800000	7e-05		Chr19	9200001	9400001	0.001165		Chr1	24026331	24073204	0.807561
Chr1	17600001	17620000	0.4247		Chr8	2800001	3000000	9.5e-05		Chr19	9400001	9600001	0.001515		Chr1	24076401	24080121	0.0196664
Chr1	17620001	17640000	0.4218		Chr8	3000001	3200000	6.5e-05		Chr19	9600001	9800001	0.00179		Chr1	24086800	24092192	1
Chr1	17640001	17660000	0.4225		Chr8	3200001	3400000	6e-05		Chr19	9800001	10000001	0.001825		Chr1	24092604	24122906	0.204529
Chr1	17660001	17680000	0.4211		Chr8	3400001	3600000	3e-05		Chr19	10000001	10200001	0.001625		Chr1	24126930	24146447	0.34216
Chr1	17680001	17700000	0.419		Chr8	3600001	3800000	5e-05		Chr19	10200001	10400001	0.001515		Chr1	24155139	24166226	0.0777305
Chr1	17700001	17720000	0.4186		Chr8	3800001	4000000	4.5e-05		Chr19	10400001	10600001	0.001675		Chr1	24207291	24226783	0.90372
Chr1	17720001	17740000	0.4182		Chr8	4000001	4200000	1e-05		Chr19	10600001	10800001	0.00131		Chr1	24228513	24243636	0.835842
Chr1	17740001	17760000	0.4149		Chr8	4200001	4400000	2e-05		Chr19	10800001	11000001	0.001915		Chr1	24244059	24252581	0.856491
Chr1	17760001	17780000	0.4115		Chr8	4400001	4600000	7.5e-05		Chr19	11000001	11200001	0.00139		Chr1	24252788	24261014	0.445146
Chr1	17780001	17800000	0.4164		Chr8	4600001	4800000	8e-05		Chr19	11200001	11400001	0.001385		Chr1	24262821	24280672	0.361708
Chr1	17800001	17820000	0.4214		Chr8	4800001	5000000	9.5e-05		Chr19	11400001	11600001	0.00166		Chr1	24283052	24286292	0.426147
Chr1	17820001	17840000	0.4247		Chr8	5000001	5200000	5.5e-05		Chr19	11600001	11800001	0.00214		Chr1	24288509	24292472	0.364792
Chr1	17840001	17860000	0.424		Chr8	5200001	5400000	0.000145		Chr19	11800001	12000001	0.001795		Chr1	24293050	24299648	0.536337
Chr1	17860001	17880000	0.4243		Chr8	5400001	5600000	9.5e-05		Chr19	12000001	12200001	0.00177		Chr1	24300725	24303446	0.516927
Chr1	17880001	17900000	0.4233		Chr8	5600001	5800000	2e-05		Chr19	12200001	12400001	0.00209		Chr1	24303841	24312683	0.647312
Chr1	17900001	17920000	0.4224		Chr8	5800001	6000000	7e-05		Chr19	12400001	12600001	0.00147		Chr1	24315334	24336123	0.775084
Chr1	17920001	17940000	0.4205		Chr8	6000001	6200000	5.5e-05		Chr19	12600001	12800001	0.001715		Chr1	24336586	24341146	0.524703
Chr1	17940001	17960000	0.4201		Chr8	6200001	6400000	2e-05		Chr19	12800001	13000001	0.001705		Chr1	24341921	24347790	0.773639
Chr1	17960001	17980000	0.4211		Chr8	6400001	6600000	2.5e-05		Chr19	13000001	13200001	0.00235		Chr1	24354025	24358176	0.400135
Chr1	17980001	18000000	0.419		Chr8	6600001	6800000	5.5e-05		Chr19	13200001	13400001	0.002855		Chr1	24361011	24368458	0.0778971
Chr1	18000001	18020000	0.4164		Chr8	6800001	7000000	8e-05		Chr19	13400001	13600001	0.0023		Chr1	24381957	24384002	0.614296
Chr1	18020001	18040000	0.4158		Chr8	7000001	7200000	4e-05		Chr19	13600001	13800001	0.002105		Chr1	24388758	24453520	0.525044
Chr1	18040001	18060000	0.4166		Chr8	7200001	7400000	4.5e-05		Chr19	13800001	14000001	0.002275		Chr1	24475248	24483224	0.18978
Chr1	18060001	18080000	0.416		Chr8	7400001	7600000	6.5e-05		Chr19	14000001	14200001	0.00212		Chr1	24479797	24482449	0.254704
Chr1	18080001	18100000	0.4185		Chr8	7600001	7800000	6.5e-05		Chr19	14200001	14400001	0.00204		Chr1	24484497	24489427	0.433641
Chr1	18100001	18120000	0.4216		Chr8	7800001	8000000	3e-05		Chr19	14400001	14600001	0.002325		Chr1	24540274	24555647	0.384547
Chr1	18120001	18140000	0.4215		Chr8	8000001	8200000	3e-05		Chr19	14600001	14800001	0.002305		Chr1	24569414	24593855	0.526781
Chr1	18140001	18160000	0.4244		Chr8	8200001	8400000	2.5e-05		Chr19	14800001	15000001	0.00236		Chr1	24593262	24600846	0.535936
Chr1	18160001	18180000	0.4229		Chr8	8400001	8600000	5e-06		Chr19	15000001	15200001	0.002145		Chr1	24598512	24607545	0.23089
Chr1	18180001	18200000	0.42		Chr8	8600001	8800000	3e-05		Chr19	15200001	15400001	0.00255		Chr1	24609678	24610943	0.956262
Chr1	18200001	18220000	0.4212		Chr8	8800001	9000000	1e-05		Chr19	15400001	15600001	0.001955		Chr1	24612475	24618158	0.877512
Chr1	18220001	18240000	0.4216		Chr8	9000001	9200000	7e-05		Chr19	15600001	15800001	0.00238		Chr1	24618708	24624504	0.856287
Chr1	18240001	18260000	0.4224		Chr8	9200001	9400000	6e-05		Chr19	15800001	16000001	0.00195		Chr1	24626120	24640247	0.396379
Chr1	18260001	18280000	0.4251		Chr8	9400001	9600000	4e-05		Chr19	16000001	16200001	0.00243		Chr1	24643187	24649483	0.709062
Chr1	18280001	18300000	0.4258		Chr8	9600001	9800000	3e-05		Chr19	16200001	16400001	0.002085		Chr1	24646900	24653247	0.180561
Chr1	18300001	18320000	0.4259		Chr8	9800001	10000000	1.5e-05		Chr19	16400001	16600001	0.00186		Chr1	24655048	24665852	0.618369
Chr1	18320001	18340000	0.4265		Chr8	10000001	10200000	5.5e-05		Chr19	16600001	16800001	0.002035		Chr1	24666801	24668874	0.366658
Chr1	18340001	18360000	0.427		Chr8	10200001	10400000	6.5e-05		Chr19	16800001	17000001	0.00149		Chr1	24670828	24685502	0.637581
Chr1	18360001	18380000	0.433		Chr8	10400001	10600000	6.5e-05		Chr19	17000001	17200001	0.001775		Chr1	24685618	24695434	0.25062
Chr1	18380001	18400000	0.439		Chr8	10600001	10800000	9.5e-05		Chr19	17200001	17400001	0.001855		Chr1	24698095	24708294	0.877799
Chr1	18400001	18420000	0.4396		Chr8	10800001	11000000	5.5e-05		Chr19	17400001	17600001	0.00202		Chr1	24708618	24724001	0.957187
Chr1	18420001	18440000	0.439		Chr8	11000001	11200000	4.5e-05		Chr19	17600001	17800001	0.00215		Chr1	24725243	24733512	0.763337
Chr1	18440001	18460000	0.4399		Chr8	11200001	11400000	3e-05		Chr19	17800001	18000001	0.00185		Chr1	24746379	24749777	0.398184
Chr1	18460001	18480000	0.4392		Chr8	11400001	11600000	3e-05		Chr19	18000001	18200001	0.00168		Chr1	24756395	24766494	0.914622
Chr1	18480001	18500000	0.4386		Chr8	11600001	11800000	1.5e-05		Chr19	18200001	18400001	0.00176		Chr1	24768484	24784454	0.50262
Chr1	18500001	18520000	0.4399		Chr8	11800001	12000000	4e-05		Chr19	18400001	18600001	0.001645		Chr1	24786084	24799768	0.0419885
Chr1	18520001	18540000	0.445		Chr8	12000001	12200000	0		Chr19	18600001	18800001	0.00197		Chr1	24786360	24787475	0.895694
Chr1	18540001	18560000	0.4449		Chr8	12200001	12400000	0		Chr19	18800001	19000001	0.00169		Chr1	24806329	24811936	0.864659
Chr1	18560001	18580000	0.4412		Chr8	12400001	12600000	5e-06		Chr19	19000001	19200001	0.001895		Chr1	24813434	24830414	0.316764
Chr1	18580001	18600000	0.4372		Chr8	12600001	12800000	5e-06		Chr19	19200001	19400001	0.001855		Chr1	24835273	24839933	0.25576
Chr1	18600001	18620000	0.437		Chr8	12800001	13000000	2e-05		Chr19	19400001	19600001	0.001625		Chr1	24840863	24847896	0.860035
Chr1	18620001	18640000	0.4367		Chr8	13000001	13200000	7e-05		Chr19	19600001	19800001	0.00178		Chr1	24853911	24861203	0.707592
Chr1	18640001	18660000	0.4341		Chr8	13200001	13400000	5e-05		Chr19	19800001	20000001	0.001875		Chr1	24861204	24868552	0.931828
Chr1	18660001	18680000	0.4325		Chr8	13400001	13600000	5e-05		Chr19	20000001	20200001	0.001385		Chr1	24876311	24887158	0.52517
Chr1	18680001	18700000	0.432		Chr8	13600001	13800000	4.5e-05		Chr19	20200001	20400001	0.00151		Chr1	24928519	24930049	0.59408
Chr1	18700001	18720000	0.4305		Chr8	13800001	14000000	2e-05		Chr19	20400001	20521517	0.000785		Chr1	24932620	25014100	0.410145
Chr1	18720001	18740000	0.428		Chr9	1	200000	4.5e-05		Chr2	1	200001	0.002655		Chr1	25021368	25027807	0.302267
Chr1	18740001	18760000	0.4286		Chr9	200001	400000	4.5e-05		Chr2	200001	400001	0.0024		Chr1	25036050	25063233	0.810738
Chr1	18760001	18780000	0.4273		Chr9	400001	600000	6e-05		Chr2	400001	600001	0.00247		Chr1	25076656	25089695	0.723244
Chr1	18780001	18800000	0.4277		Chr9	600001	800000	2e-05		Chr2	600001	800001	0.00234		Chr1	25106854	25113565	0.966309
Chr1	18800001	18820000	0.4278		Chr9	800001	1000000	1.5e-05		Chr2	800001	1000001	0.002695		Chr1	25119038	25136931	0.147826
Chr1	18820001	18840000	0.4271		Chr9	1000001	1200000	3.5e-05		Chr2	1000001	1200001	0.00278		Chr1	25137660	25139558	1
Chr1	18840001	18860000	0.4275		Chr9	1200001	1400000	5e-05		Chr2	1200001	1400001	0.00266		Chr1	25140959	25147465	0.964544
Chr1	18860001	18880000	0.4288		Chr9	1400001	1600000	3.5e-05		Chr2	1400001	1600001	0.00251		Chr1	25148281	25157289	0.207729
Chr1	18880001	18900000	0.4299		Chr9	1600001	1800000	5e-05		Chr2	1600001	1800001	0.002235		Chr1	25157581	25163295	0.618984
Chr1	18900001	18920000	0.4268		Chr9	1800001	2000000	7e-05		Chr2	1800001	2000001	0.00274		Chr1	25161484	25166962	0.797294
Chr1	18920001	18940000	0.4246		Chr9	2000001	2200000	4.5e-05		Chr2	2000001	2200001	0.0021		Chr1	25167042	25168237	0.480099
Chr1	18940001	18960000	0.4234		Chr9	2200001	2400000	1e-05		Chr2	2200001	2400001	0.00242		Chr1	25171569	25174141	0.90586
Chr1	18960001	18980000	0.4233		Chr9	2400001	2600000	2e-05		Chr2	2400001	2600001	0.00234		Chr1	25177746	25182747	0.887856
Chr1	18980001	19000000	0.4222		Chr9	2600001	2800000	5e-06		Chr2	2600001	2800001	0.001235		Chr1	25183969	25194413	0.280436
Chr1	19000001	19020000	0.4211		Chr9	2800001	3000000	2.5e-05		Chr2	2800001	3000001	0.001285		Chr1	25200827	25207469	0.084947
Chr1	19020001	19040000	0.4229		Chr9	3000001	3200000	6e-05		Chr2	3000001	3200001	0.001685		Chr1	25210709	25225698	0.0719817
Chr1	19040001	19060000	0.4218		Chr9	3200001	3400000	1e-05		Chr2	3200001	3400001	0.001545		Chr1	25234011	25236774	0.982232
Chr1	19060001	19080000	0.4228		Chr9	3400001	3600000	3e-05		Chr2	3400001	3600001	0.001895		Chr1	25236836	25240051	0.80549
Chr1	19080001	19100000	0.4214		Chr9	3600001	3800000	1.5e-05		Chr2	3600001	3800001	0.00225		Chr1	25239972	25243953	0.267016
Chr1	19100001	19120000	0.4249		Chr9	3800001	4000000	4e-05		Chr2	3800001	4000001	0.00182		Chr1	25244405	25253553	0.823558
Chr1	19120001	19140000	0.426		Chr9	4000001	4200000	5e-05		Chr2	4000001	4200001	0.002045		Chr1	25253998	25264640	0.549413
Chr1	19140001	19160000	0.4273		Chr9	4200001	4400000	5.5e-05		Chr2	4200001	4400001	0.002205		Chr1	25259736	25306866	0.447262
Chr1	19160001	19180000	0.4271		Chr9	4400001	4600000	2e-05		Chr2	4400001	4600001	0.00201		Chr1	25308572	25345410	0.04663
Chr1	19180001	19200000	0.4286		Chr9	4600001	4800000	3.5e-05		Chr2	4600001	4800001	0.002045		Chr1	25346759	25351706	0.359619
Chr1	19200001	19220000	0.4296		Chr9	4800001	5000000	6e-05		Chr2	4800001	5000001	0.00239		Chr1	25352814	25355466	0.0294446
Chr1	19220001	19240000	0.429		Chr9	5000001	5200000	4e-05		Chr2	5000001	5200001	0.00255		Chr1	25356805	25362907	0.583913
Chr1	19240001	19260000	0.4318		Chr9	5200001	5400000	7e-05		Chr2	5200001	5400001	0.001995		Chr1	25397331	25486039	0.812243
Chr1	19260001	19280000	0.4321		Chr9	5400001	5600000	0.000115		Chr2	5400001	5600001	0.002215		Chr1	25565844	25569019	0.00254636
Chr1	19280001	19300000	0.4337		Chr9	5600001	5800000	0.0001		Chr2	5600001	5800001	0.00204		Chr1	25569030	25572437	0.617777
Chr1	19300001	19320000	0.4312		Chr9	5800001	6000000	0.00012		Chr2	5800001	6000001	0.00221		Chr1	25578657	25606495	0.410026
Chr1	19320001	19340000	0.4311		Chr9	6000001	6200000	0.00016		Chr2	6000001	6200001	0.002455		Chr1	25636138	25636769	0.995348
Chr1	19340001	19360000	0.4315		Chr9	6200001	6400000	0.000155		Chr2	6200001	6400001	0.0024		Chr1	25654271	25659103	0.181031
Chr1	19360001	19380000	0.4324		Chr9	6400001	6600000	9e-05		Chr2	6400001	6600001	0.002275		Chr1	25659115	25661994	0.397402
Chr1	19380001	19400000	0.4311		Chr9	6600001	6800000	8.5e-05		Chr2	6600001	6800001	0.002275		Chr1	25662394	25668235	0.424286
Chr1	19400001	19420000	0.4288		Chr9	6800001	7000000	7e-05		Chr2	6800001	7000001	0.00232		Chr1	25680971	25735946	0.844598
Chr1	19420001	19440000	0.4284		Chr9	7000001	7200000	9.5e-05		Chr2	7000001	7200001	0.00243		Chr1	25737274	25742618	0.546251
Chr1	19440001	19460000	0.4268		Chr9	7200001	7400000	8e-05		Chr2	7200001	7400001	0.001535		Chr1	25751488	25758586	0.678157
Chr1	19460001	19480000	0.4264		Chr9	7400001	7600000	5e-06		Chr2	7400001	7600001	0.00181		Chr1	25761033	25770723	0.382167
Chr1	19480001	19500000	0.4262		Chr9	7600001	7800000	7e-05		Chr2	7600001	7800001	0.002125		Chr1	25773160	25786370	0.975231
Chr1	19500001	19520000	0.4286		Chr9	7800001	8000000	4e-05		Chr2	7800001	8000001	0.002		Chr1	25787633	25805916	0.593277
Chr1	19520001	19540000	0.428		Chr9	8000001	8200000	4.5e-05		Chr2	8000001	8200001	0.001805		Chr1	25808986	25817075	0.256555
Chr1	19540001	19560000	0.4256		Chr9	8200001	8400000	9e-05		Chr2	8200001	8400001	0.002275		Chr1	25833889	25836772	0.901526
Chr1	19560001	19580000	0.4245		Chr9	8400001	8600000	0.000155		Chr2	8400001	8600001	0.002015		Chr1	25837722	25849101	0.229729
Chr1	19580001	19600000	0.4242		Chr9	8600001	8800000	8e-05		Chr2	8600001	8800001	0.002215		Chr1	25845508	25880719	0.9513
Chr1	19600001	19620000	0.4249		Chr9	8800001	9000000	5.5e-05		Chr2	8800001	9000001	0.00177		Chr1	25882898	25893627	0.393684
Chr1	19620001	19640000	0.4234		Chr9	9000001	9200000	8e-05		Chr2	9000001	9200001	0.00161		Chr1	25894189	25907363	0.0497494
Chr1	19640001	19660000	0.4242		Chr9	9200001	9400000	9.5e-05		Chr2	9200001	9400001	0.002225		Chr1	25922677	25935912	0.0152927
Chr1	19660001	19680000	0.4236		Chr9	9400001	9600000	0.00012		Chr2	9400001	9600001	0.002025		Chr1	25938760	25953011	0.0725664
Chr1	19680001	19700000	0.4258		Chr9	9600001	9800000	3e-05		Chr2	9600001	9800001	0.002755		Chr1	25983790	26003307	0.900704
Chr1	19700001	19720000	0.4256		Chr9	9800001	10000000	8e-05		Chr2	9800001	10000001	0.001955		Chr1	26078499	26081367	0.270958
Chr1	19720001	19740000	0.4264		Chr9	10000001	10200000	5e-05		Chr2	10000001	10200001	0.002105		Chr1	26082079	26088888	0.568441
Chr1	19740001	19760000	0.4259		Chr9	10200001	10400000	5.5e-05		Chr2	10200001	10400001	0.00212		Chr1	26089036	26122686	0.750922
Chr1	19760001	19780000	0.4254		Chr9	10400001	10600000	2e-05		Chr2	10400001	10600001	0.00226		Chr1	26125967	26131029	0.723763
Chr1	19780001	19800000	0.4244		Chr9	10600001	10800000	2.5e-05		Chr2	10600001	10800001	0.00257		Chr1	26145755	26148043	0.321413
Chr1	19800001	19820000	0.4233		Chr9	10800001	11000000	2e-05		Chr2	10800001	11000001	0.00285		Chr1	26150704	26151626	0.499936
Chr1	19820001	19840000	0.424		Chr9	11000001	11200000	9e-05		Chr2	11000001	11200001	0.003075		Chr1	26152096	26155009	0.62495
Chr1	19840001	19860000	0.4222		Chr9	11200001	11400000	3e-05		Chr2	11200001	11400001	0.002975		Chr1	26161423	26162444	0.981702
Chr1	19860001	19880000	0.4204		Chr9	11400001	11600000	9.5e-05		Chr2	11400001	11600001	0.00247		Chr1	26164722	26171134	0.336791
Chr1	19880001	19900000	0.4175		Chr9	11600001	11800000	7.5e-05		Chr2	11600001	11800001	0.002875		Chr1	26175133	26180133	0.209171
Chr1	19900001	19920000	0.4149		Chr9	11800001	12000000	5.5e-05		Chr2	11800001	12000001	0.002315		Chr1	26186645	26190364	0.372843
Chr1	19920001	19940000	0.4141		Chr9	12000001	12200000	8.5e-05		Chr2	12000001	12200001	0.00167		Chr1	26209547	26221495	0.806114
Chr1	19940001	19960000	0.4157		Chr9	12200001	12400000	5.5e-05		Chr2	12200001	12400001	0.00136		Chr1	26236077	26242703	0.381101
Chr1	19960001	19980000	0.4176		Chr9	12400001	12600000	0.00013		Chr2	12400001	12600001	0.0016		Chr1	26245180	26257250	0.448438
Chr1	19980001	20000000	0.4174		Chr9	12600001	12800000	0.00011		Chr2	12600001	12800001	0.0024		Chr1	26261559	26274749	0.910512
Chr1	20000001	20020000	0.4172		Chr9	12800001	13000000	8e-05		Chr2	12800001	13000001	0.00257		Chr1	26279881	26282926	0.510408
Chr1	20020001	20040000	0.417		Chr9	13000001	13200000	5e-05		Chr2	13000001	13200001	0.002675		Chr1	26283508	26289287	0.411947
Chr1	20040001	20060000	0.4168		Chr9	13200001	13400000	9.5e-05		Chr2	13200001	13400001	0.00282		Chr1	26290537	26291268	0.453235
Chr1	20060001	20080000	0.4195		Chr9	13400001	13600000	2.5e-05		Chr2	13400001	13600001	0.002375		Chr1	26296190	26316077	0.85808
Chr1	20080001	20100000	0.4205		Chr10	1	200000	9e-05		Chr2	13600001	13800001	0.002255		Chr1	26396479	26436865	0.124523
Chr1	20100001	20120000	0.4249		Chr10	200001	400000	0.00013		Chr2	13800001	14000001	0.001835		Chr1	26439833	26481001	0.912604
Chr1	20120001	20140000	0.4263		Chr10	400001	600000	9e-05		Chr2	14000001	14200001	0.00234		Chr1	26489681	26519275	0.839384
Chr1	20140001	20160000	0.4279		Chr10	600001	800000	2.5e-05		Chr2	14200001	14400001	0.002325		Chr1	26542464	26551451	0.466191
Chr1	20160001	20180000	0.4271		Chr10	800001	1000000	8.5e-05		Chr2	14400001	14600001	0.00263		Chr1	26554634	26559762	0.848947
Chr1	20180001	20200000	0.4272		Chr10	1000001	1200000	4e-05		Chr2	14600001	14800001	0.002325		Chr1	26554634	26564850	0.537779
Chr1	20200001	20220000	0.4293		Chr10	1200001	1400000	1e-05		Chr2	14800001	15000001	0.001875		Chr1	26566700	26596379	0.295927
Chr1	20220001	20240000	0.4296		Chr10	1400001	1600000	1.5e-05		Chr2	15000001	15200001	0.00284		Chr1	26637831	26654692	0.800297
Chr1	20240001	20260000	0.4319		Chr10	1600001	1800000	0.00011		Chr2	15200001	15400001	0.003155		Chr1	26656424	26688522	0.239736
Chr1	20260001	20280000	0.4315		Chr10	1800001	2000000	8e-05		Chr2	15400001	15600001	0.002945		Chr1	26684042	26691966	0.158661
Chr1	20280001	20300000	0.4288		Chr10	2000001	2200000	8.5e-05		Chr2	15600001	15800001	0.00337		Chr1	26696984	26700128	0.219982
Chr1	20300001	20320000	0.4255		Chr10	2200001	2400000	6.5e-05		Chr2	15800001	16000001	0.00294		Chr1	26732965	26736268	0.706638
Chr1	20320001	20340000	0.4242		Chr10	2400001	2600000	5e-05		Chr2	16000001	16200001	0.002925		Chr1	26737011	26740771	0.442994
Chr1	20340001	20360000	0.4201		Chr10	2600001	2800000	9e-05		Chr2	16200001	16400001	0.003415		Chr1	26740471	26747559	0.437884
Chr1	20360001	20380000	0.4219		Chr10	2800001	3000000	0.000135		Chr2	16400001	16600001	0.002425		Chr1	26774241	26838859	0.67013
Chr1	20380001	20400000	0.4242		Chr10	3000001	3200000	6e-05		Chr2	16600001	16800001	0.002665		Chr1	26840470	26847849	0.442626
Chr1	20400001	20420000	0.4244		Chr10	3200001	3400000	0.0001		Chr2	16800001	17000001	0.002455		Chr1	26851507	26860347	0.126825
Chr1	20420001	20440000	0.425		Chr10	3400001	3600000	2e-05		Chr2	17000001	17200001	0.002435		Chr1	26862289	26871258	0.694208
Chr1	20440001	20460000	0.423		Chr10	3600001	3800000	4.5e-05		Chr2	17200001	17400001	0.002685		Chr1	26873342	26896806	0.607282
Chr1	20460001	20480000	0.4228		Chr10	3800001	4000000	3e-05		Chr2	17400001	17600001	0.00244		Chr1	26902554	26903796	0.203215
Chr1	20480001	20500000	0.4237		Chr10	4000001	4200000	0.00013		Chr2	17600001	17800001	0.002365		Chr1	26906019	26911272	0.574223
Chr1	20500001	20520000	0.4242		Chr10	4200001	4400000	5e-05		Chr2	17800001	18000001	0.002335		Chr1	26914360	26933119	0.580445
Chr1	20520001	20540000	0.4246		Chr10	4400001	4600000	1.5e-05		Chr2	18000001	18200001	0.00205		Chr1	26935264	26938075	0.376281
Chr1	20540001	20560000	0.4268		Chr10	4600001	4800000	7.5e-05		Chr2	18200001	18400001	0.002085		Chr1	26940390	26947279	0.518709
Chr1	20560001	20580000	0.4239		Chr10	4800001	5000000	6.5e-05		Chr2	18400001	18600001	0.002525		Chr1	26951705	26955282	0.604227
Chr1	20580001	20600000	0.4249		Chr10	5000001	5200000	5e-05		Chr2	18600001	18800001	0.002475		Chr1	26955801	26977890	0.485786
Chr1	20600001	20620000	0.4263		Chr10	5200001	5400000	6.5e-05		Chr2	18800001	19000001	0.002535		Chr1	26978925	26995484	0.803595
Chr1	20620001	20640000	0.426		Chr10	5400001	5600000	8e-05		Chr2	19000001	19200001	0.002335		Chr1	27005409	27008039	0.639433
Chr1	20640001	20660000	0.4267		Chr10	5600001	5800000	7e-05		Chr2	19200001	19400001	0.002975		Chr1	27011559	27026030	0.513652
Chr1	20660001	20680000	0.4256		Chr10	5800001	6000000	0.00011		Chr2	19400001	19600001	0.00242		Chr1	27035288	27045798	0.94022
Chr1	20680001	20700000	0.4261		Chr10	6000001	6200000	0.000115		Chr2	19600001	19800001	0.002195		Chr1	27048528	27070422	0.460105
Chr1	20700001	20720000	0.4284		Chr10	6200001	6400000	8.5e-05		Chr2	19800001	20000001	0.00228		Chr1	27068146	27083346	0.156372
Chr1	20720001	20740000	0.4276		Chr10	6400001	6600000	3.5e-05		Chr2	20000001	20200001	0.002495		Chr1	27085840	27091733	0.776157
Chr1	20740001	20760000	0.4259		Chr10	6600001	6800000	4.5e-05		Chr2	20200001	20400001	0.002775		Chr1	27094624	27107257	0.464629
Chr1	20760001	20780000	0.4281		Chr10	6800001	7000000	5e-05		Chr2	20400001	20600001	0.00218		Chr1	27107338	27110814	1
Chr1	20780001	20800000	0.4261		Chr10	7000001	7200000	3.5e-05		Chr2	20600001	20800001	0.002835		Chr1	27111322	27127616	0.605155
Chr1	20800001	20820000	0.4232		Chr10	7200001	7400000	8.5e-05		Chr2	20800001	21000001	0.001875		Chr1	27129899	27138808	0.00278713
Chr1	20820001	20840000	0.4229		Chr10	7400001	7600000	1e-05		Chr2	21000001	21200001	0.002395		Chr1	27146002	27158355	0.54163
Chr1	20840001	20860000	0.4234		Chr10	7600001	7800000	2.5e-05		Chr2	21200001	21400001	0.0029		Chr1	27175890	27194243	0.30813
Chr1	20860001	20880000	0.4238		Chr10	7800001	8000000	4.5e-05		Chr2	21400001	21600001	0.00272		Chr1	27222370	27229953	0.122743
Chr1	20880001	20900000	0.4224		Chr10	8000001	8200000	0.00013		Chr2	21600001	21800001	0.002485		Chr1	27229935	27240019	0.400759
Chr1	20900001	20920000	0.4189		Chr10	8200001	8400000	0.000115		Chr2	21800001	22000001	0.00253		Chr1	27241503	27292624	0.326593
Chr1	20920001	20940000	0.4173		Chr10	8400001	8600000	0.0001		Chr2	22000001	22200001	0.00238		Chr1	27294439	27317305	0.247467
Chr1	20940001	20960000	0.4176		Chr10	8600001	8800000	1.5e-05		Chr2	22200001	22400001	0.00265		Chr1	27321333	27374098	0.736447
Chr1	20960001	20980000	0.4155		Chr10	8800001	9000000	2.5e-05		Chr2	22400001	22600001	0.002575		Chr1	27382275	27431093	0.729932
Chr1	20980001	21000000	0.4147		Chr10	9000001	9200000	4.5e-05		Chr2	22600001	22800001	0.002315		Chr1	27436896	27442484	0.924202
Chr1	21000001	21020000	0.4161		Chr10	9200001	9400000	5e-05		Chr2	22800001	23000001	0.00225		Chr1	27442513	27452983	0.501852
Chr1	21020001	21040000	0.4172		Chr10	9400001	9600000	9.5e-05		Chr2	23000001	23200001	0.002475		Chr1	27453488	27474328	0.916751
Chr1	21040001	21060000	0.4163		Chr10	9600001	9800000	9e-05		Chr2	23200001	23400001	0.002975		Chr1	27476159	27480308	0.295522
Chr1	21060001	21080000	0.4172		Chr10	9800001	10000000	8e-05		Chr2	23400001	23600001	0.00241		Chr1	27502951	27513785	0.848873
Chr1	21080001	21100000	0.4198		Chr10	10000001	10200000	4e-05		Chr2	23600001	23800001	0.002425		Chr1	27517834	27526311	0.162591
Chr1	21100001	21120000	0.4226		Chr10	10200001	10400000	5.5e-05		Chr2	23800001	24000001	0.002535		Chr1	27537205	27539946	0.220448
Chr1	21120001	21140000	0.4238		Chr10	10400001	10600000	6e-05		Chr2	24000001	24200001	0.002765		Chr1	27551395	27556897	0.253952
Chr1	21140001	21160000	0.4242		Chr10	10600001	10800000	7.5e-05		Chr2	24200001	24400001	0.00262		Chr1	27595071	27623589	0.543892
Chr1	21160001	21180000	0.4265		Chr10	10800001	11000000	0.00011		Chr2	24400001	24600001	0.00265		Chr1	27639950	27640567	0.99126
Chr1	21180001	21200000	0.4269		Chr10	11000001	11200000	5e-05		Chr2	24600001	24800001	0.00202		Chr1	27655420	27674577	0.505461
Chr1	21200001	21220000	0.4262		Chr10	11200001	11400000	2.5e-05		Chr2	24800001	25000001	0.00264		Chr1	27678354	27686455	0.0442339
Chr1	21220001	21240000	0.425		Chr11	1	200000	4e-05		Chr2	25000001	25200001	0.00217		Chr1	27711818	27714562	0.136685
Chr1	21240001	21260000	0.4246		Chr11	200001	400000	5.5e-05		Chr2	25200001	25400001	0.00259		Chr1	27718358	27764687	0.648032
Chr1	21260001	21280000	0.4235		Chr11	400001	600000	3e-05		Chr2	25400001	25600001	0.002595		Chr1	27772029	27776403	0.705873
Chr1	21280001	21300000	0.4205		Chr11	600001	800000	9e-05		Chr2	25600001	25800001	0.00366		Chr1	27779535	27793435	0.560936
Chr1	21300001	21320000	0.4185		Chr11	800001	1000000	4e-05		Chr2	25800001	26000001	0.00284		Chr1	27799274	27800191	0.998404
Chr1	21320001	21340000	0.4175		Chr11	1000001	1200000	3e-05		Chr2	26000001	26200001	0.00313		Chr1	27801996	27824480	0.128817
Chr1	21340001	21360000	0.4161		Chr11	1200001	1400000	8.5e-05		Chr2	26200001	26400001	0.00319		Chr1	27825156	27860478	0.614174
Chr1	21360001	21380000	0.4153		Chr11	1400001	1600000	7.5e-05		Chr2	26400001	26600001	0.00308		Chr1	27863131	27870070	0.202395
Chr1	21380001	21400000	0.4149		Chr11	1600001	1800000	4e-05		Chr2	26600001	26800001	0.003255		Chr1	27877621	27892312	0.64047
Chr1	21400001	21420000	0.4143		Chr11	1800001	2000000	0.00013		Chr2	26800001	27000001	0.002995		Chr1	27893540	27896031	0.314914
Chr1	21420001	21440000	0.4156		Chr11	2000001	2200000	7e-05		Chr2	27000001	27200001	0.00316		Chr1	27896193	27904437	0.851541
Chr1	21440001	21460000	0.417		Chr11	2200001	2400000	3e-05		Chr2	27200001	27400001	0.00273		Chr1	27913739	27918456	0.485919
Chr1	21460001	21480000	0.4183		Chr11	2400001	2600000	7.5e-05		Chr2	27400001	27600001	0.002235		Chr1	27921285	27926891	0.590156
Chr1	21480001	21500000	0.4212		Chr11	2600001	2800000	5e-05		Chr2	27600001	27800001	0.00283		Chr1	27930550	27938569	0.503151
Chr1	21500001	21520000	0.4226		Chr11	2800001	3000000	2.5e-05		Chr2	27800001	28000001	0.00257		Chr1	27942582	27956957	0.180951
Chr1	21520001	21540000	0.4244		Chr11	3000001	3200000	5e-05		Chr2	28000001	28200001	0.0027		Chr1	27957961	27963751	0.833601
Chr1	21540001	21560000	0.4249		Chr11	3200001	3400000	0.0001		Chr2	28200001	28400001	0.002425		Chr1	27974525	27994338	0.717513
Chr1	21560001	21580000	0.4228		Chr11	3400001	3600000	3.5e-05		Chr2	28400001	28600001	0.002765		Chr1	27996390	28033514	0.381889
Chr1	21580001	21600000	0.4215		Chr11	3600001	3800000	8.5e-05		Chr2	28600001	28800001	0.00316		Chr1	28034200	28123248	0.233208
Chr1	21600001	21620000	0.4235		Chr11	3800001	4000000	5e-05		Chr2	28800001	29000001	0.00309		Chr1	28130709	28152830	0.345838
Chr1	21620001	21640000	0.4222		Chr11	4000001	4200000	6e-05		Chr2	29000001	29200001	0.00318		Chr1	28157653	28172983	0.768122
Chr1	21640001	21660000	0.4218		Chr11	4200001	4400000	6.5e-05		Chr2	29200001	29400001	0.00282		Chr1	28176952	28182362	0.383742
Chr1	21660001	21680000	0.4225		Chr11	4400001	4600000	9.5e-05		Chr2	29400001	29600001	0.003		Chr1	28182706	28185309	0.224158
Chr1	21680001	21700000	0.4183		Chr11	4600001	4800000	1e-05		Chr2	29600001	29800001	0.00278		Chr1	28186114	28203291	0.511269
Chr1	21700001	21720000	0.4174		Chr11	4800001	5000000	8.5e-05		Chr2	29800001	30000001	0.00237		Chr1	28205323	28224703	0.320269
Chr1	21720001	21740000	0.4164		Chr11	5000001	5200000	7.5e-05		Chr2	30000001	30200001	0.00233		Chr1	28232580	28252520	0.446642
Chr1	21740001	21760000	0.4169		Chr11	5200001	5400000	8.5e-05		Chr2	30200001	30400001	0.00276		Chr1	28262644	28278592	0.0980386
Chr1	21760001	21780000	0.4195		Chr11	5400001	5600000	8.5e-05		Chr2	30400001	30600001	0.00258		Chr1	28327590	28330665	0.0937291
Chr1	21780001	21800000	0.4197		Chr11	5600001	5800000	7e-05		Chr2	30600001	30800001	0.002165		Chr1	28331696	28333722	0.219318
Chr1	21800001	21820000	0.4166		Chr11	5800001	6000000	9e-05		Chr2	30800001	31000001	0.002735		Chr1	28338306	28340276	0.101432
Chr1	21820001	21840000	0.4158		Chr11	6000001	6200000	0.0001		Chr2	31000001	31200001	0.00245		Chr1	28349579	28351958	0.975724
Chr1	21840001	21860000	0.4156		Chr11	6200001	6400000	0.00013		Chr2	31200001	31400001	0.00229		Chr1	28358242	28362294	0.483544
Chr1	21860001	21880000	0.414		Chr11	6400001	6600000	9e-05		Chr2	31400001	31600001	0.00192		Chr1	28365930	28369862	0.0146823
Chr1	21880001	21900000	0.4165		Chr11	6600001	6800000	0.00013		Chr2	31600001	31800001	0.00272		Chr1	28373058	28374769	0.222064
Chr1	21900001	21920000	0.4185		Chr11	6800001	7000000	0.00013		Chr2	31800001	32000001	0.00265		Chr1	28383774	28384868	0.498844
Chr1	21920001	21940000	0.4192		Chr11	7000001	7200000	0.00017		Chr2	32000001	32200001	0.002465		Chr1	28386526	28388672	0.0646266
Chr1	21940001	21960000	0.4196		Chr12	1	200000	2.5e-05		Chr2	32200001	32400001	0.002495		Chr1	28397760	28399137	0.990359
Chr1	21960001	21980000	0.4192		Chr12	200001	400000	3.5e-05		Chr2	32400001	32585208	0.00262		Chr1	28400640	28406999	0.0794547
Chr1	21980001	22000000	0.4208		Chr12	400001	600000	2.5e-05		Chr20	1	200001	0.000735		Chr1	28477270	28483541	0.232806
Chr1	22000001	22020000	0.423		Chr12	600001	800000	6e-05		Chr20	200001	400001	0.00046		Chr1	28483659	28489064	0.531604
Chr1	22020001	22040000	0.4249		Chr12	800001	1000000	7e-05		Chr20	400001	600001	0.001085		Chr1	28485869	28493158	0.743302
Chr1	22040001	22060000	0.4247		Chr12	1000001	1200000	7e-05		Chr20	600001	800001	0.001355		Chr1	28503575	28507196	0.625118
Chr1	22060001	22080000	0.4241		Chr12	1200001	1400000	7.5e-05		Chr20	800001	1000001	0.001475		Chr1	28516114	28522556	0.992021
Chr1	22080001	22100000	0.4253		Chr12	1400001	1600000	7.5e-05		Chr20	1000001	1200001	0.001395		Chr1	28626842	28635629	0.0888144
Chr1	22100001	22120000	0.4212		Chr12	1600001	1800000	7e-05		Chr20	1200001	1400001	0.00144		Chr1	28709337	28721017	0.932014
Chr1	22120001	22140000	0.4206		Chr12	1800001	2000000	0.000125		Chr20	1400001	1600001	0.001775		Chr1	28722188	28742461	0.351374
Chr1	22140001	22160000	0.4206		Chr12	2000001	2200000	3.5e-05		Chr20	1600001	1800001	0.001255		Chr1	28765932	28776940	0.28511
Chr1	22160001	22180000	0.4221		Chr12	2200001	2400000	2.5e-05		Chr20	1800001	2000001	0.0015		Chr1	28794802	28797081	0.0880875
Chr1	22180001	22200000	0.4229		Chr12	2400001	2600000	7.5e-05		Chr20	2000001	2200001	0.00144		Chr1	28797666	28806883	0.800866
Chr1	22200001	22220000	0.423		Chr12	2600001	2800000	6e-05		Chr20	2200001	2400001	0.001145		Chr1	28808060	28846298	0.580813
Chr1	22220001	22240000	0.4241		Chr12	2800001	3000000	8e-05		Chr20	2400001	2600001	0.00149		Chr1	28848915	28853665	0.710572
Chr1	22240001	22260000	0.4226		Chr12	3000001	3200000	5e-05		Chr20	2600001	2800001	0.00205		Chr1	28854155	28870997	0.441986
Chr1	22260001	22280000	0.4238		Chr12	3200001	3400000	4e-05		Chr20	2800001	3000001	0.001515		Chr1	28879221	28897753	0.174676
Chr1	22280001	22300000	0.4214		Chr12	3400001	3600000	6e-05		Chr20	3000001	3200001	0.0013		Chr1	29188645	29197886	0.277881
Chr1	22300001	22320000	0.4231		Chr12	3600001	3800000	6.5e-05		Chr20	3200001	3400001	0.00187		Chr1	29198678	29203658	0.861514
Chr1	22320001	22340000	0.4247		Chr12	3800001	4000000	0.00014		Chr20	3400001	3600001	0.001925		Chr1	29203756	29209215	0.691229
Chr1	22340001	22360000	0.4243		Chr12	4000001	4200000	0.00011		Chr20	3600001	3800001	0.001975		Chr1	29210068	29211975	0.302495
Chr1	22360001	22380000	0.4232		Chr12	4200001	4400000	0.00011		Chr20	3800001	4000001	0.001735		Chr1	29215342	29224868	0.368045
Chr1	22380001	22400000	0.4223		Chr12	4400001	4600000	0.00012		Chr20	4000001	4200001	0.00194		Chr1	29233642	29240267	0.813903
Chr1	22400001	22420000	0.4211		Chr12	4600001	4800000	0.0001		Chr20	4200001	4400001	0.001925		Chr1	29241804	29247394	0.586353
Chr1	22420001	22440000	0.4193		Chr12	4800001	5000000	0.000115		Chr20	4400001	4600001	0.00176		Chr1	29248580	29268476	0.187009
Chr1	22440001	22460000	0.4201		Chr12	5000001	5200000	8e-05		Chr20	4600001	4800001	0.00152		Chr1	29270132	29275722	0.256216
Chr1	22460001	22480000	0.4191		Chr12	5200001	5400000	7.5e-05		Chr20	4800001	5000001	0.001405		Chr1	29276488	29280433	0.0375177
Chr1	22480001	22500000	0.4226		Chr12	5400001	5600000	9e-05		Chr20	5000001	5200001	0.00177		Chr1	29279506	29286130	0.634341
Chr1	22500001	22520000	0.4212		Chr12	5600001	5800000	5e-06		Chr20	5200001	5400001	0.00156		Chr1	29373379	29381032	0.859324
Chr1	22520001	22540000	0.4186		Chr12	5800001	6000000	5e-05		Chr20	5400001	5600001	0.00175		Chr1	29388779	29407043	0.00911391
Chr1	22540001	22560000	0.4208		Chr12	6000001	6200000	2e-05		Chr20	5600001	5800001	0.001685		Chr1	29410621	29427550	0.0419713
Chr1	22560001	22580000	0.4198		Chr12	6200001	6400000	8.5e-05		Chr20	5800001	6000001	0.0021		Chr1	29430632	29435344	0.088872
Chr1	22580001	22600000	0.4204		Chr12	6400001	6600000	4.5e-05		Chr20	6000001	6200001	0.00192		Chr1	29438681	29440646	0.534179
Chr1	22600001	22620000	0.42		Chr12	6600001	6800000	0.000105		Chr20	6200001	6400001	0.00172		Chr1	29446051	29449510	0.713048
Chr1	22620001	22640000	0.4202		Chr12	6800001	7000000	7e-05		Chr20	6400001	6600001	0.001575		Chr1	29451036	29469618	0.197011
Chr1	22640001	22660000	0.4214		Chr12	7000001	7200000	1e-05		Chr20	6600001	6800001	0.001995		Chr1	29487127	29489330	0.403384
Chr1	22660001	22680000	0.4218		Chr12	7200001	7400000	0.00012		Chr20	6800001	7000001	0.00158		Chr1	29508446	29515919	0.94932
Chr1	22680001	22700000	0.4185		Chr12	7400001	7600000	0.000105		Chr20	7000001	7200001	0.001935		Chr1	29548625	29576635	0.183067
Chr1	22700001	22720000	0.419		Chr12	7600001	7800000	7.5e-05		Chr20	7200001	7400001	0.001845		Chr1	29580566	29593974	0.0215481
Chr1	22720001	22740000	0.4194		Chr12	7800001	8000000	2.5e-05		Chr20	7400001	7600001	0.001985		Chr1	29598024	29598962	0.820628
Chr1	22740001	22760000	0.4157		Chr12	8000001	8200000	0.00011		Chr20	7600001	7800001	0.002145		Chr1	29600321	29605866	0.556339
Chr1	22760001	22780000	0.4136		Chr12	8200001	8400000	5.5e-05		Chr20	7800001	8000001	0.002245		Chr1	29606639	29615435	0.580881
Chr1	22780001	22800000	0.4137		Chr12	8400001	8600000	4.5e-05		Chr20	8000001	8200001	0.00219		Chr1	29616419	29629176	0.104193
Chr1	22800001	22820000	0.4137		Chr12	8600001	8800000	4.5e-05		Chr20	8200001	8400001	0.001835		Chr1	29624656	29651561	0.435444
Chr1	22820001	22840000	0.4154		Chr12	8800001	9000000	7.5e-05		Chr20	8400001	8600001	0.002405		Chr1	29652473	29671632	0.878829
Chr1	22840001	22860000	0.4149		Chr12	9000001	9200000	5e-05		Chr20	8600001	8800001	0.00197		Chr1	29674965	29680355	0.51592
Chr1	22860001	22880000	0.4126		Chr12	9200001	9400000	8e-05		Chr20	8800001	9000001	0.002215		Chr1	29680786	29705296	0.493537
Chr1	22880001	22900000	0.4131		Chr12	9400001	9600000	6e-05		Chr20	9000001	9200001	0.00195		Chr1	29696748	29698315	0.979288
Chr1	22900001	22920000	0.414		Chr12	9600001	9800000	6e-05		Chr20	9200001	9400001	0.002125		Chr1	29705318	29722048	0.863173
Chr1	22920001	22940000	0.4149		Chr12	9800001	10000000	4e-05		Chr20	9400001	9600001	0.0019		Chr1	29722648	29726309	0.745557
Chr1	22940001	22960000	0.4216		Chr12	10000001	10200000	4.5e-05		Chr20	9600001	9800001	0.002495		Chr1	29752314	29757086	0.276256
Chr1	22960001	22980000	0.4234		Chr12	10200001	10400000	8e-05		Chr20	9800001	10000001	0.00197		Chr1	29758756	29782186	0.380884
Chr1	22980001	23000000	0.4237		Chr12	10400001	10600000	6.5e-05		Chr20	10000001	10200001	0.002425		Chr1	29791876	29798470	0.7274
Chr1	23000001	23020000	0.4243		Chr12	10600001	10800000	1e-05		Chr20	10200001	10400001	0.00271		Chr1	29795062	29806099	0.0729215
Chr1	23020001	23040000	0.4228		Chr12	10800001	11000000	1e-05		Chr20	10400001	10600001	0.002115		Chr1	29810023	29826873	0.624719
Chr1	23040001	23060000	0.4226		Chr13	1	200000	2.5e-05		Chr20	10600001	10800001	0.002065		Chr1	29826162	29831420	0.440517
Chr1	23060001	23080000	0.4264		Chr13	200001	400000	2.5e-05		Chr20	10800001	11000001	0.00159		Chr1	29832245	29833886	0.852289
Chr1	23080001	23100000	0.4268		Chr13	400001	600000	1e-05		Chr20	11000001	11200001	0.00234		Chr1	29834832	29862822	0.104633
Chr1	23100001	23120000	0.4277		Chr13	600001	800000	1e-05		Chr20	11200001	11400001	0.00191		Chr1	29876538	29913688	0.834271
Chr1	23120001	23140000	0.4289		Chr13	800001	1000000	1e-05		Chr20	11400001	11600001	0.001855		Chr1	29930055	29934287	0.134837
Chr1	23140001	23160000	0.4227		Chr13	1000001	1200000	3e-05		Chr20	11600001	11800001	0.002235		Chr1	29935221	29942465	0.597113
Chr1	23160001	23180000	0.4233		Chr13	1200001	1400000	3e-05		Chr20	11800001	12000001	0.001945		Chr1	29943715	29957729	0.110573
Chr1	23180001	23200000	0.4245		Chr13	1400001	1600000	4.5e-05		Chr20	12000001	12200001	0.002125		Chr1	29959616	29963447	0.204207
Chr1	23200001	23220000	0.4239		Chr13	1600001	1800000	3e-05		Chr20	12200001	12400001	0.001465		Chr1	29966884	29980961	0.914978
Chr1	23220001	23240000	0.4221		Chr13	1800001	2000000	4e-05		Chr20	12400001	12600001	0.001525		Chr1	29984839	29995963	0.711769
Chr1	23240001	23260000	0.4228		Chr13	2000001	2200000	3.5e-05		Chr20	12600001	12800001	0.00199		Chr1	30003598	30024010	0.502854
Chr1	23260001	23280000	0.4206		Chr13	2200001	2400000	6.5e-05		Chr20	12800001	13000001	0.00232		Chr1	30030858	30052532	0.447484
Chr1	23280001	23300000	0.4207		Chr13	2400001	2600000	6e-05		Chr20	13000001	13200001	0.00187		Chr1	30053788	30065082	0.0535864
Chr1	23300001	23320000	0.421		Chr13	2600001	2800000	2e-05		Chr20	13200001	13400001	0.00216		Chr1	30072094	30076782	0.134375
Chr1	23320001	23340000	0.4198		Chr13	2800001	3000000	7.5e-05		Chr20	13400001	13600001	0.002405		Chr1	30082178	30089367	0.886045
Chr1	23340001	23360000	0.4226		Chr13	3000001	3200000	9.5e-05		Chr20	13600001	13800001	0.00253		Chr1	30091172	30101553	0.0734142
Chr1	23360001	23380000	0.4227		Chr13	3200001	3400000	7.5e-05		Chr20	13800001	14000001	0.002165		Chr1	30103074	30111956	0.0575933
Chr1	23380001	23400000	0.4215		Chr13	3400001	3600000	7e-05		Chr20	14000001	14200001	0.00253		Chr1	30116536	30118399	0.707884
Chr1	23400001	23420000	0.4227		Chr13	3600001	3800000	7.5e-05		Chr20	14200001	14400001	0.002225		Chr1	30121457	30126928	0.0383519
Chr1	23420001	23440000	0.4232		Chr13	3800001	4000000	8.5e-05		Chr20	14400001	14600001	0.00342		Chr1	30128299	30151342	0.0322331
Chr1	23440001	23460000	0.4244		Chr13	4000001	4200000	6.5e-05		Chr20	14600001	14800001	0.002775		Chr1	30153071	30168404	0.0153988
Chr1	23460001	23480000	0.4253		Chr13	4200001	4400000	8e-05		Chr20	14800001	15000001	0.002705		Chr1	30173517	30192830	0.0341167
Chr1	23480001	23500000	0.4266		Chr13	4400001	4600000	8.5e-05		Chr20	15000001	15200001	0.002705		Chr1	30194827	30222628	0.0557878
Chr1	23500001	23520000	0.4247		Chr13	4600001	4800000	0.0001		Chr20	15200001	15400001	0.002385		Chr1	30224215	30231130	0.448361
Chr1	23520001	23540000	0.4255		Chr13	4800001	5000000	7.5e-05		Chr20	15400001	15600001	0.00326		Chr1	30228843	30234425	0.485493
Chr1	23540001	23560000	0.4245		Chr13	5000001	5200000	7.5e-05		Chr20	15600001	15800001	0.002575		Chr1	30234449	30241512	0.509228
Chr1	23560001	23580000	0.4244		Chr13	5200001	5400000	0.0001		Chr20	15800001	16000001	0.002775		Chr1	30245117	30310176	0.975882
Chr1	23580001	23600000	0.424		Chr13	5400001	5600000	0.00013		Chr20	16000001	16200001	0.002905		Chr1	30339853	30363132	0.884959
Chr1	23600001	23620000	0.4253		Chr13	5600001	5800000	0.000155		Chr20	16200001	16400001	0.003475		Chr1	30369974	30405130	0.80766
Chr1	23620001	23640000	0.4262		Chr13	5800001	6000000	8e-05		Chr20	16400001	16600001	0.00332		Chr1	30399918	30421695	0.280713
Chr1	23640001	23660000	0.4273		Chr13	6000001	6200000	6.5e-05		Chr20	16600001	16800001	0.0027		Chr1	30438910	30444057	0.442129
Chr1	23660001	23680000	0.4272		Chr13	6200001	6400000	5e-05		Chr20	16800001	17000001	0.003185		Chr1	30445749	30458394	0.243058
Chr1	23680001	23700000	0.426		Chr13	6400001	6600000	5.5e-05		Chr20	17000001	17200001	0.00321		Chr1	30461732	30475276	0.373314
Chr1	23700001	23720000	0.4267		Chr13	6600001	6800000	9e-05		Chr20	17200001	17400001	0.00296		Chr1	30480299	30483732	0.35992
Chr1	23720001	23740000	0.4269		Chr13	6800001	7000000	0.00011		Chr20	17400001	17600001	0.002885		Chr1	30494494	30502707	0.80465
Chr1	23740001	23760000	0.4265		Chr13	7000001	7200000	0.0001		Chr20	17600001	17800001	0.002825		Chr1	30512105	30530278	0.967776
Chr1	23760001	23780000	0.4269		Chr13	7200001	7400000	7.5e-05		Chr20	17800001	18000001	0.00311		Chr1	30533180	30550669	0.686331
Chr1	23780001	23800000	0.4269		Chr13	7400001	7600000	4e-05		Chr20	18000001	18200001	0.003585		Chr1	30544074	30554159	0.174174
Chr1	23800001	23820000	0.4252		Chr13	7600001	7800000	9.5e-05		Chr20	18200001	18400001	0.00283		Chr1	30557230	30585160	0.940475
Chr1	23820001	23840000	0.4247		Chr13	7800001	8000000	0.000105		Chr20	18400001	18600001	0.003135		Chr1	30590506	30602042	0.896414
Chr1	23840001	23860000	0.4222		Chr13	8000001	8200000	3.5e-05		Chr20	18600001	18800001	0.00299		Chr1	30626360	30631727	0.344129
Chr1	23860001	23880000	0.4219		Chr13	8200001	8400000	6.5e-05		Chr20	18800001	19000001	0.003025		Chr1	30633952	30647945	0.527069
Chr1	23880001	23900000	0.4192		Chr13	8400001	8600000	6.5e-05		Chr20	19000001	19096086	0.000895		Chr1	30648843	30666631	0.884073
Chr1	23900001	23920000	0.4207		Chr13	8600001	8800000	8e-05		Chr21	1	200001	0.00282		Chr1	30668528	30671785	0.232277
Chr1	23920001	23940000	0.4195		Chr13	8800001	9000000	8e-05		Chr21	200001	400001	0.00342		Chr1	30675459	30692886	0.0308087
Chr1	23940001	23960000	0.4208		Chr13	9000001	9200000	5e-05		Chr21	400001	600001	0.00334		Chr1	30692972	30703243	0.223506
Chr1	23960001	23980000	0.4216		Chr13	9200001	9400000	5e-05		Chr21	600001	800001	0.00276		Chr1	30703795	30728528	0.385698
Chr1	23980001	24000000	0.4225		Chr13	9400001	9600000	4.5e-05		Chr21	800001	1000001	0.003105		Chr1	30736475	30745337	0.0751102
Chr1	24000001	24020000	0.4241		Chr13	9600001	9800000	6e-05		Chr21	1000001	1200001	0.002835		Chr1	30747594	30755813	0.84461
Chr1	24020001	24040000	0.4254		Chr13	9800001	10000000	7.5e-05		Chr21	1200001	1400001	0.003615		Chr1	30755985	30762091	0.108345
Chr1	24040001	24060000	0.4252		Chr13	10000001	10200000	4.5e-05		Chr21	1400001	1600001	0.002975		Chr1	30764642	30777921	0.667524
Chr1	24060001	24080000	0.425		Chr13	10200001	10400000	0.00012		Chr21	1600001	1800001	0.002995		Chr1	30778585	30795897	0.0603425
Chr1	24080001	24100000	0.43		Chr13	10400001	10600000	4.5e-05		Chr21	1800001	2000001	0.001115		Chr1	30796814	30804244	0.775186
Chr1	24100001	24120000	0.4284		Chr13	10600001	10800000	5e-05		Chr21	2000001	2200001	0.001585		Chr1	30809144	30875843	0.0818531
Chr1	24120001	24140000	0.4319		Chr13	10800001	11000000	7.5e-05		Chr21	2200001	2400001	0.00203		Chr1	30877356	30910365	0.111339
Chr1	24140001	24160000	0.4354		Chr13	11000001	11200000	5.5e-05		Chr21	2400001	2600001	0.00243		Chr1	30957716	30969313	0.769565
Chr1	24160001	24180000	0.4327		Chr13	11200001	11400000	6.5e-05		Chr21	2600001	2800001	0.002085		Chr1	30992933	31067546	0.752036
Chr1	24180001	24200000	0.4324		Chr13	11400001	11600000	6e-05		Chr21	2800001	3000001	0.00241		Chr1	31159119	31160501	0.325585
Chr1	24200001	24220000	0.4328		Chr13	11600001	11800000	4e-05		Chr21	3000001	3200001	0.00157		Chr1	31175250	31192668	0.760983
Chr1	24220001	24240000	0.4344		Chr13	11800001	12000000	5e-05		Chr21	3200001	3400001	0.00197		Chr1	31197594	31214578	0.0639145
Chr1	24240001	24260000	0.4344		Chr13	12000001	12200000	0.000105		Chr21	3400001	3600001	0.00238		Chr1	31216779	31238725	0.0174529
Chr1	24260001	24280000	0.4351		Chr13	12200001	12400000	0.00014		Chr21	3600001	3800001	0.002625		Chr1	31241030	31244195	0.901232
Chr1	24280001	24300000	0.4357		Chr13	12400001	12600000	0.000125		Chr21	3800001	4000001	0.00207		Chr1	31246068	31259887	0.277877
Chr1	24300001	24320000	0.4365		Chr13	12600001	12800000	9e-05		Chr21	4000001	4200001	0.002205		Chr1	31307766	31310537	0.121611
Chr1	24320001	24340000	0.4362		Chr13	12800001	13000000	5e-05		Chr21	4200001	4400001	0.002425		Chr1	31365120	31376064	0.638831
Chr1	24340001	24360000	0.4324		Chr13	13000001	13200000	5e-06		Chr21	4400001	4600001	0.002175		Chr1	31378430	31387774	0.684392
Chr1	24360001	24380000	0.4373		Chr13	13200001	13400000	0.0001		Chr21	4600001	4800001	0.00229		Chr1	31388323	31440408	0.540934
Chr1	24380001	24400000	0.4396		Chr13	13400001	13600000	9.5e-05		Chr21	4800001	5000001	0.002375		Chr1	31476176	31493028	0.820467
Chr1	24400001	24420000	0.4394		Chr13	13600001	13800000	5e-05		Chr21	5000001	5200001	0.001945		Chr1	31498735	31552435	0.866349
Chr1	24420001	24440000	0.4387		Chr13	13800001	14000000	0.0001		Chr21	5200001	5400001	0.00169		Chr1	31563650	31619865	0.609139
Chr1	24440001	24460000	0.4394		Chr13	14000001	14200000	4e-05		Chr21	5400001	5600001	0.002125		Chr1	31677248	31706471	0.237173
Chr1	24460001	24480000	0.4405		Chr13	14200001	14400000	6e-05		Chr21	5600001	5800001	0.002425		Chr1	31709181	31744009	0.55247
Chr1	24480001	24500000	0.4384		Chr13	14400001	14600000	6.5e-05		Chr21	5800001	6000001	0.00223		Chr1	31748828	31775609	0.587918
Chr1	24500001	24520000	0.4395		Chr13	14600001	14800000	2e-05		Chr21	6000001	6200001	0.002055		Chr1	31810354	31822081	0.529937
Chr1	24520001	24540000	0.4372		Chr13	14800001	15000000	6e-05		Chr21	6200001	6400001	0.00208		Chr1	31828504	31832854	0.209529
Chr1	24540001	24560000	0.4351		Chr13	15000001	15200000	7e-05		Chr21	6400001	6600001	0.002355		Chr1	31892281	31911048	0.523498
Chr1	24560001	24580000	0.4309		Chr14	1	200000	3.5e-05		Chr21	6600001	6800001	0.002735		Chr1	31927868	31952123	0.804209
Chr1	24580001	24600000	0.4274		Chr14	200001	400000	2.5e-05		Chr21	6800001	7000001	0.00192		Chr1	31970369	31994921	0.200671
Chr1	24600001	24620000	0.4265		Chr14	400001	600000	2.5e-05		Chr21	7000001	7200001	0.00243		Chr1	32076142	32095627	0.193376
Chr1	24620001	24640000	0.4277		Chr14	600001	800000	2.5e-05		Chr21	7200001	7400001	0.0025		Chr1	32148726	32153142	0.489295
Chr1	24640001	24660000	0.4269		Chr14	800001	1000000	2e-05		Chr21	7400001	7600001	0.00222		Chr1	32156066	32166253	0.160302
Chr1	24660001	24680000	0.4271		Chr14	1000001	1200000	5e-06		Chr21	7600001	7800001	0.002335		Chr1	32211176	32212563	0.345643
Chr1	24680001	24700000	0.4273		Chr14	1200001	1400000	5e-05		Chr21	7800001	8000001	0.00255		Chr1	32218436	32221988	0.459177
Chr1	24700001	24720000	0.4259		Chr14	1400001	1600000	4.5e-05		Chr21	8000001	8200001	0.00263		Chr1	32466104	32476659	0.420743
Chr1	24720001	24740000	0.426		Chr14	1600001	1800000	1.5e-05		Chr21	8200001	8400001	0.00307		Chr1	32477634	32481131	0.57769
Chr1	24740001	24760000	0.4305		Chr14	1800001	2000000	4.5e-05		Chr21	8400001	8600001	0.00309		Chr1	32485831	32503486	0.652248
Chr1	24760001	24780000	0.4331		Chr14	2000001	2200000	3e-05		Chr21	8600001	8800001	0.00252		Chr1	32503553	32537350	0.423296
Chr1	24780001	24800000	0.4352		Chr14	2200001	2400000	2e-05		Chr21	8800001	9000001	0.00283		Chr1	32541193	32554392	0.200775
Chr1	24800001	24820000	0.4368		Chr14	2400001	2600000	3.5e-05		Chr21	9000001	9200001	0.003085		Chr1	32557935	32566178	0.188567
Chr1	24820001	24840000	0.4331		Chr14	2600001	2800000	3.5e-05		Chr21	9200001	9400001	0.003245		Chr1	32581005	32588339	0.943068
Chr1	24840001	24860000	0.4323		Chr14	2800001	3000000	2e-05		Chr21	9400001	9600001	0.002965		Chr1	32593931	32599632	0.813693
Chr1	24860001	24880000	0.4333		Chr14	3000001	3200000	8e-05		Chr21	9600001	9800001	0.00236		Chr1	32600619	32603041	0.759956
Chr1	24880001	24900000	0.4339		Chr14	3200001	3400000	6.5e-05		Chr21	9800001	10000001	0.00254		Chr1	32608815	32621158	0.366916
Chr1	24900001	24920000	0.4333		Chr14	3400001	3600000	6.5e-05		Chr21	10000001	10200001	0.0023		Chr1	32623445	32636251	0.761339
Chr1	24920001	24940000	0.4312		Chr14	3600001	3800000	8.5e-05		Chr21	10200001	10400001	0.002905		Chr1	32697215	32699924	0.583365
Chr1	24940001	24960000	0.4283		Chr14	3800001	4000000	5.5e-05		Chr21	10400001	10600001	0.00285		Chr1	32701054	32704270	0.560687
Chr1	24960001	24980000	0.4256		Chr14	4000001	4200000	5e-05		Chr21	10600001	10800001	0.002495		Chr1	32706288	32707359	0.991556
Chr1	24980001	25000000	0.4218		Chr14	4200001	4400000	6.5e-05		Chr21	10800001	11000001	0.00257		Chr1	32708832	32716621	0.891496
Chr1	25000001	25020000	0.418		Chr14	4400001	4600000	3.5e-05		Chr21	11000001	11200001	0.002885		Chr1	32716587	32719957	0.997236
Chr1	25020001	25040000	0.4196		Chr14	4600001	4800000	5e-05		Chr21	11200001	11400001	0.00288		Chr1	32721974	32739273	0.167334
Chr1	25040001	25060000	0.4206		Chr14	4800001	5000000	3.5e-05		Chr21	11400001	11600001	0.002915		Chr1	32741447	32742257	0.00167266
Chr1	25060001	25080000	0.4176		Chr14	5000001	5200000	8e-05		Chr21	11600001	11800001	0.002625		Chr1	32746536	32771659	0.756507
Chr1	25080001	25100000	0.4197		Chr14	5200001	5400000	5e-05		Chr21	11800001	12000001	0.002635		Chr1	32799757	32817748	0.863456
Chr1	25100001	25120000	0.4222		Chr14	5400001	5600000	8e-05		Chr21	12000001	12200001	0.002435		Chr1	32818154	32821600	0.511557
Chr1	25120001	25140000	0.4241		Chr14	5600001	5800000	0.000135		Chr21	12200001	12400001	0.00248		Chr1	32821696	32826425	0.566871
Chr1	25140001	25160000	0.4247		Chr14	5800001	6000000	9e-05		Chr21	12400001	12600001	0.00235		Chr1	32826135	32834176	0.705368
Chr1	25160001	25180000	0.4271		Chr14	6000001	6200000	5e-05		Chr21	12600001	12800001	0.00233		Chr1	32835987	32839550	0.363648
Chr1	25180001	25200000	0.4285		Chr14	6200001	6400000	4.5e-05		Chr21	12800001	13000001	0.00232		Chr1	32845850	32877856	0.882316
Chr1	25200001	25220000	0.4301		Chr14	6400001	6600000	0.0001		Chr21	13000001	13200001	0.00225		Chr1	32889121	32890078	0.741888
Chr1	25220001	25240000	0.4308		Chr14	6600001	6800000	2.5e-05		Chr21	13200001	13400001	0.002135		Chr1	32895523	32898248	0.895272
Chr1	25240001	25260000	0.4333		Chr14	6800001	7000000	9.5e-05		Chr21	13400001	13600001	0.002295		Chr1	32903714	32905300	0.20083
Chr1	25260001	25280000	0.4344		Chr14	7000001	7200000	5.5e-05		Chr21	13600001	13800001	0.002385		Chr1	32906587	32918366	0.0710369
Chr1	25280001	25300000	0.4326		Chr14	7200001	7400000	9e-05		Chr21	13800001	14000001	0.00249		Chr1	32931005	32943933	0.0700445
Chr1	25300001	25320000	0.4303		Chr14	7400001	7600000	8e-05		Chr21	14000001	14200001	0.00212		Chr1	32946705	32952033	0.674675
Chr1	25320001	25340000	0.4312		Chr14	7600001	7800000	4.5e-05		Chr21	14200001	14400001	0.00212		Chr1	32956572	32987624	0.695645
Chr1	25340001	25360000	0.4322		Chr14	7800001	8000000	4.5e-05		Chr21	14400001	14600001	0.002255		Chr1	32988305	32992395	0.425764
Chr1	25360001	25380000	0.4312		Chr14	8000001	8200000	7e-05		Chr21	14600001	14800001	0.001745		Chr1	32992481	32997213	0.428167
Chr1	25380001	25400000	0.4324		Chr14	8200001	8400000	7e-05		Chr21	14800001	15000001	0.002165		Chr1	33001502	33027779	0.447961
Chr1	25400001	25420000	0.437		Chr14	8400001	8600000	3e-05		Chr21	15000001	15200001	0.00338		Chr1	33030914	33041042	0.539892
Chr1	25420001	25440000	0.4386		Chr14	8600001	8800000	6e-05		Chr21	15200001	15400001	0.00264		Chr1	33048403	33050228	0.744178
Chr1	25440001	25460000	0.4379		Chr14	8800001	9000000	6.5e-05		Chr21	15400001	15600001	0.002865		Chr1	33121607	33126473	0.244882
Chr1	25460001	25480000	0.4374		Chr14	9000001	9200000	0.000115		Chr21	15600001	15800001	0.002615		Chr1	33128939	33191193	0.80887
Chr1	25480001	25500000	0.4354		Chr14	9200001	9400000	0.00012		Chr21	15800001	16000001	0.001915		Chr1	33194841	33235981	0.898267
Chr1	25500001	25520000	0.4375		Chr14	9400001	9600000	7.5e-05		Chr21	16000001	16200001	0.00266		Chr1	33236061	33242672	0.0306578
Chr1	25520001	25540000	0.4377		Chr14	9600001	9800000	5.5e-05		Chr21	16200001	16400001	0.002905		Chr1	33242333	33249067	0.504577
Chr1	25540001	25560000	0.4373		Chr14	9800001	10000000	8.5e-05		Chr21	16400001	16600001	0.00205		Chr1	33248922	33258835	0.600992
Chr1	25560001	25580000	0.4367		Chr14	10000001	10200000	8e-05		Chr21	16600001	16800001	0.00231		Chr1	33261167	33283622	0.687377
Chr1	25580001	25600000	0.4402		Chr14	10200001	10400000	0.000115		Chr21	16800001	17000001	0.002065		Chr1	33284707	33285687	0.917009
Chr1	25600001	25620000	0.4382		Chr14	10400001	10600000	0.000115		Chr21	17000001	17200001	0.002045		Chr1	33287062	33290055	0.568665
Chr1	25620001	25640000	0.4354		Chr14	10600001	10800000	7.5e-05		Chr21	17200001	17400001	0.002265		Chr1	33289086	33293955	0.312623
Chr1	25640001	25660000	0.4327		Chr14	10800001	11000000	6e-05		Chr21	17400001	17600001	0.00222		Chr1	33294378	33295563	0.94796
Chr1	25660001	25680000	0.4334		Chr14	11000001	11200000	1.5e-05		Chr21	17600001	17800001	0.00239		Chr1	33315181	33317475	0.973905
Chr1	25680001	25700000	0.4358		Chr14	11200001	11400000	1e-05		Chr21	17800001	18000001	0.00157		Chr1	33324395	33334133	0.958223
Chr1	25700001	25720000	0.4351		Chr14	11400001	11600000	4.5e-05		Chr21	18000001	18200001	0.001965		Chr1	33391874	33473117	0.607294
Chr1	25720001	25740000	0.4336		Chr14	11600001	11800000	8e-05		Chr21	18200001	18400001	0.001935		Chr1	33475196	33485612	0.875922
Chr1	25740001	25760000	0.434		Chr14	11800001	12000000	5e-05		Chr21	18400001	18600001	0.00186		Chr1	33486841	33491004	0.530219
Chr1	25760001	25780000	0.4342		Chr14	12000001	12200000	9e-05		Chr21	18600001	18800001	0.001955		Chr1	33491173	33510216	0.969877
Chr1	25780001	25800000	0.4293		Chr14	12200001	12400000	8e-05		Chr21	18800001	19000001	0.002005		Chr1	33511389	33523525	0.160876
Chr1	25800001	25820000	0.4297		Chr14	12400001	12600000	6.5e-05		Chr21	19000001	19200001	0.00182		Chr1	33523530	33537048	0.791993
Chr1	25820001	25840000	0.4306		Chr14	12600001	12800000	7.5e-05		Chr21	19200001	19400001	0.002005		Chr1	33537537	33546241	0.517656
Chr1	25840001	25860000	0.4321		Chr14	12800001	13000000	7.5e-05		Chr21	19400001	19600001	0.00227		Chr1	33547017	33549391	0.0230515
Chr1	25860001	25880000	0.4324		Chr14	13000001	13200000	4e-05		Chr21	19600001	19800001	0.00205		Chr1	33549726	33571095	0.190784
Chr1	25880001	25900000	0.4309		Chr14	13200001	13400000	4e-05		Chr21	19800001	20000001	0.00235		Chr1	33557697	33576218	0.13966
Chr1	25900001	25920000	0.4309		Chr14	13400001	13600000	6e-05		Chr21	20000001	20200001	0.002375		Chr1	33592310	33606015	0.183939
Chr1	25920001	25940000	0.4317		Chr14	13600001	13800000	0		Chr21	20200001	20400001	0.002125		Chr1	33614648	33619615	0.0334096
Chr1	25940001	25960000	0.4283		Chr14	13800001	14000000	6e-05		Chr21	20400001	20600001	0.001955		Chr1	33625289	33642412	0.935772
Chr1	25960001	25980000	0.4288		Chr14	14000001	14200000	6.5e-05		Chr21	20600001	20800001	0.00218		Chr1	33642091	33656915	0.67514
Chr1	25980001	26000000	0.4309		Chr14	14200001	14400000	8.5e-05		Chr21	20800001	21000001	0.002325		Chr1	33656918	33671157	0.162842
Chr1	26000001	26020000	0.4302		Chr14	14400001	14600000	7e-05		Chr21	21000001	21200001	0.00231		Chr1	33671538	33685212	0.0854371
Chr1	26020001	26040000	0.4312		Chr14	14600001	14800000	6.5e-05		Chr21	21200001	21400001	0.001855		Chr1	33698365	33705343	0.130303
Chr1	26040001	26060000	0.4311		Chr14	14800001	15000000	4e-05		Chr21	21400001	21600001	0.00226		Chr1	33708915	33711727	0.9042
Chr1	26060001	26080000	0.431		Chr14	15000001	15200000	6e-05		Chr21	21600001	21800001	0.00226		Chr1	33717651	33758271	0.82779
Chr1	26080001	26100000	0.4302		Chr14	15200001	15400000	3e-05		Chr21	21800001	22000001	0.00218		Chr1	33757715	33762084	0.208694
Chr1	26100001	26120000	0.4314		Chr14	15400001	15600000	6e-05		Chr21	22000001	22200001	0.002125		Chr1	33762295	33764606	0.182312
Chr1	26120001	26140000	0.433		Chr14	15600001	15800000	2.5e-05		Chr21	22200001	22400001	0.00196		Chr1	33768106	33771832	0.431443
Chr1	26140001	26160000	0.4365		Chr14	15800001	16000000	2.5e-05		Chr21	22400001	22600001	0.001925		Chr1	33778988	33782782	0.313166
Chr1	26160001	26180000	0.4371		Chr14	16000001	16200000	6e-05		Chr21	22600001	22800001	0.001515		Chr1	33783878	33786409	0.458397
Chr1	26180001	26200000	0.4367		Chr14	16200001	16400000	6.5e-05		Chr21	22800001	23000001	0.00218		Chr1	33823184	33826117	0.594409
Chr1	26200001	26220000	0.4355		Chr14	16400001	16600000	4e-05		Chr21	23000001	23200001	0.00215		Chr1	33836562	33868840	0.330036
Chr1	26220001	26240000	0.4368		Chr15	1	200000	2.5e-05		Chr21	23200001	23400001	0.00172		Chr1	33870050	33875056	0.552294
Chr1	26240001	26260000	0.4384		Chr15	200001	400000	1e-05		Chr21	23400001	23600001	0.002205		Chr1	33875646	33879609	0.394616
Chr1	26260001	26280000	0.44		Chr15	400001	600000	8.5e-05		Chr21	23600001	23800001	0.00212		Chr1	33880086	33887404	0.256809
Chr1	26280001	26300000	0.4398		Chr15	600001	800000	4.5e-05		Chr21	23800001	24000001	0.00214		Chr1	33889419	33917483	0.47129
Chr1	26300001	26320000	0.4387		Chr15	800001	1000000	6.5e-05		Chr21	24000001	24200001	0.00207		Chr1	33918521	33933186	0.0286218
Chr1	26320001	26340000	0.4358		Chr15	1000001	1200000	3e-05		Chr21	24200001	24400001	0.00196		Chr1	33934368	33944984	0.657835
Chr1	26340001	26360000	0.4341		Chr15	1200001	1400000	8.5e-05		Chr21	24400001	24600001	0.001975		Chr1	33947298	33951578	0.615554
Chr1	26360001	26380000	0.4339		Chr15	1400001	1600000	1e-05		Chr21	24600001	24800001	0.00235		Chr1	33950730	33955134	0.937899
Chr1	26380001	26400000	0.4341		Chr15	1600001	1800000	0.000125		Chr21	24800001	25000001	0.00231		Chr1	33956293	33961516	0.503588
Chr1	26400001	26420000	0.4354		Chr15	1800001	2000000	5e-05		Chr21	25000001	25200001	0.001815		Chr1	33961839	33968862	0.844375
Chr1	26420001	26440000	0.432		Chr15	2000001	2200000	2e-05		Chr21	25200001	25400001	0.001995		Chr1	33967314	33977517	0.288113
Chr1	26440001	26460000	0.4325		Chr15	2200001	2400000	3.5e-05		Chr21	25400001	25600001	0.00226		Chr1	33978100	33980798	0.031856
Chr1	26460001	26480000	0.4297		Chr15	2400001	2600000	5.5e-05		Chr21	25600001	25800001	0.00213		Chr1	33981525	33989958	0.237618
Chr1	26480001	26500000	0.4314		Chr15	2600001	2800000	7.5e-05		Chr21	25800001	26000001	0.00183		Chr1	33991495	34008827	0.197989
Chr1	26500001	26520000	0.4319		Chr15	2800001	3000000	3.5e-05		Chr21	26000001	26200001	0.002555		Chr1	34011683	34013564	0.348024
Chr1	26520001	26540000	0.4326		Chr15	3000001	3200000	9.5e-05		Chr21	26200001	26400001	0.00249		Chr1	34014964	34015752	0.0946715
Chr1	26540001	26560000	0.4346		Chr15	3200001	3400000	0.00013		Chr21	26400001	26406474	0.000195		Chr1	34017092	34019005	0.514699
Chr1	26560001	26580000	0.4355		Chr15	3400001	3600000	0.000115		Chr22	1	200001	0.001565		Chr1	34026151	34033046	0.754556
Chr1	26580001	26600000	0.4347		Chr15	3600001	3800000	6.5e-05		Chr22	200001	400001	0.00092		Chr1	34037722	34055398	0.520399
Chr1	26600001	26620000	0.4352		Chr15	3800001	4000000	0.00016		Chr22	400001	600001	0.001655		Chr1	34067746	34079923	0.0563494
Chr1	26620001	26640000	0.4358		Chr15	4000001	4200000	8.5e-05		Chr22	600001	800001	0.001485		Chr1	34088453	34105323	0.949849
Chr1	26640001	26660000	0.4352		Chr15	4200001	4400000	0.000105		Chr22	800001	1000001	0.0018		Chr1	34107192	34115738	0.00703985
Chr1	26660001	26680000	0.4366		Chr15	4400001	4600000	3.5e-05		Chr22	1000001	1200001	0.00222		Chr1	34114740	34124886	0.126329
Chr1	26680001	26700000	0.4359		Chr15	4600001	4800000	0.00012		Chr22	1200001	1400001	0.00252		Chr1	34126545	34129681	0.273633
Chr1	26700001	26720000	0.4358		Chr15	4800001	5000000	0.000135		Chr22	1400001	1600001	0.002215		Chr1	34130237	34137940	0.239247
Chr1	26720001	26740000	0.4362		Chr15	5000001	5200000	0.000165		Chr22	1600001	1800001	0.002475		Chr1	34138693	34172119	0.351262
Chr1	26740001	26760000	0.4331		Chr15	5200001	5400000	0.0001		Chr22	1800001	2000001	0.00293		Chr1	34174424	34182114	0.170964
Chr1	26760001	26780000	0.4304		Chr15	5400001	5600000	8.5e-05		Chr22	2000001	2200001	0.002515		Chr1	34186718	34200120	0.691954
Chr1	26780001	26800000	0.4317		Chr15	5600001	5800000	9e-05		Chr22	2200001	2400001	0.00288		Chr1	34201649	34205138	0.937209
Chr1	26800001	26820000	0.4303		Chr15	5800001	6000000	5e-05		Chr22	2400001	2600001	0.0025		Chr1	34205782	34207771	0.220304
Chr1	26820001	26840000	0.4307		Chr15	6000001	6200000	5.5e-05		Chr22	2600001	2800001	0.00289		Chr1	34208855	34220959	0.855415
Chr1	26840001	26860000	0.4304		Chr15	6200001	6400000	8e-05		Chr22	2800001	3000001	0.00219		Chr1	34219574	34226065	0.513642
Chr1	26860001	26880000	0.4307		Chr15	6400001	6600000	7.5e-05		Chr22	3000001	3200001	0.002685		Chr1	34227069	34235817	0.207935
Chr1	26880001	26900000	0.4313		Chr15	6600001	6800000	9e-05		Chr22	3200001	3400001	0.002025		Chr1	34241520	34248454	0.250344
Chr1	26900001	26920000	0.4304		Chr15	6800001	7000000	9.5e-05		Chr22	3400001	3600001	0.001815		Chr1	34246890	34254812	0.125404
Chr1	26920001	26940000	0.4306		Chr15	7000001	7200000	0.00014		Chr22	3600001	3800001	0.00206		Chr1	34257359	34263928	0.0349486
Chr1	26940001	26960000	0.4337		Chr15	7200001	7400000	0.000115		Chr22	3800001	4000001	0.00231		Chr1	34264903	34272737	0.146892
Chr1	26960001	26980000	0.4359		Chr15	7400001	7600000	0.000155		Chr22	4000001	4200001	0.00182		Chr1	34273667	34276224	0.0190175
Chr1	26980001	27000000	0.4341		Chr15	7600001	7800000	0.0001		Chr22	4200001	4400001	0.001885		Chr1	34278349	34281815	0.354818
Chr1	27000001	27020000	0.4341		Chr15	7800001	8000000	0.00014		Chr22	4400001	4600001	0.00197		Chr1	34282845	34302473	0.200281
Chr1	27020001	27040000	0.4337		Chr15	8000001	8200000	0.00011		Chr22	4600001	4800001	0.001475		Chr1	34305614	34309807	0.210231
Chr1	27040001	27060000	0.4307		Chr15	8200001	8400000	0.000105		Chr22	4800001	5000001	0.00194		Chr1	34310835	34313288	7e-09
Chr1	27060001	27080000	0.4302		Chr15	8400001	8600000	6.5e-05		Chr22	5000001	5200001	0.00189		Chr1	34314801	34317480	0.838702
Chr1	27080001	27100000	0.4313		Chr15	8600001	8800000	0.000105		Chr22	5200001	5400001	0.002245		Chr1	34318017	34331719	0.168939
Chr1	27100001	27120000	0.43		Chr15	8800001	9000000	7e-05		Chr22	5400001	5600001	0.002305		Chr1	34334987	34348901	0.920209
Chr1	27120001	27140000	0.431		Chr15	9000001	9200000	3.5e-05		Chr22	5600001	5800001	0.002225		Chr1	34350295	34366364	0.633308
Chr1	27140001	27160000	0.4309		Chr15	9200001	9400000	4e-05		Chr22	5800001	6000001	0.001945		Chr1	34365254	34373246	0.464602
Chr1	27160001	27180000	0.4295		Chr15	9400001	9600000	4e-05		Chr22	6000001	6200001	0.00186		Chr1	34377585	34420598	0.818433
Chr1	27180001	27200000	0.4322		Chr15	9600001	9800000	2e-05		Chr22	6200001	6400001	0.00194		Chr1	34425192	34428049	0.634172
Chr1	27200001	27220000	0.4329		Chr15	9800001	10000000	4e-05		Chr22	6400001	6600001	0.0015		Chr1	34429272	34448482	0.702141
Chr1	27220001	27240000	0.4347		Chr15	10000001	10200000	4e-05		Chr22	6600001	6800001	0.001915		Chr1	34457694	34476674	0.0941703
Chr1	27240001	27260000	0.438		Chr15	10200001	10400000	3.5e-05		Chr22	6800001	7000001	0.0023		Chr1	34477011	34488511	0.24506
Chr1	27260001	27280000	0.4403		Chr16	1	200000	5e-06		Chr22	7000001	7200001	0.002575		Chr1	34489124	34491145	0.545077
Chr1	27280001	27300000	0.4398		Chr16	200001	400000	5e-06		Chr22	7200001	7400001	0.00245		Chr1	34491535	34495080	0.823251
Chr1	27300001	27320000	0.4416		Chr16	400001	600000	6e-05		Chr22	7400001	7600001	0.00301		Chr1	34495492	34506048	0.695554
Chr1	27320001	27340000	0.4409		Chr16	600001	800000	4.5e-05		Chr22	7600001	7800001	0.00275		Chr1	34509430	34519568	0.0740327
Chr1	27340001	27360000	0.4398		Chr16	800001	1000000	5.5e-05		Chr22	7800001	8000001	0.003255		Chr1	34521643	34525793	0.193068
Chr1	27360001	27380000	0.439		Chr16	1000001	1200000	0.00019		Chr22	8000001	8200001	0.00173		Chr1	34530980	34536017	0.371679
Chr1	27380001	27400000	0.438		Chr16	1200001	1400000	0.00015		Chr22	8200001	8400001	0.00213		Chr1	34538299	34553894	0.13968
Chr1	27400001	27420000	0.4382		Chr16	1400001	1600000	0.000135		Chr22	8400001	8600001	0.00244		Chr1	34554035	34557837	0.294895
Chr1	27420001	27440000	0.4369		Chr16	1600001	1800000	0.000155		Chr22	8600001	8800001	0.002565		Chr1	34557913	34565743	0.352235
Chr1	27440001	27460000	0.4356		Chr16	1800001	2000000	9.5e-05		Chr22	8800001	9000001	0.00213		Chr1	34566226	34582497	0.354526
Chr1	27460001	27480000	0.4342		Chr16	2000001	2200000	0.000105		Chr22	9000001	9200001	0.002435		Chr1	34584166	34591569	0.736284
Chr1	27480001	27500000	0.4333		Chr16	2200001	2400000	3.5e-05		Chr22	9200001	9400001	0.003115		Chr1	34592094	34597205	0.0715217
Chr1	27500001	27520000	0.4334		Chr16	2400001	2600000	6.5e-05		Chr22	9400001	9600001	0.00281		Chr1	34598320	34601925	0.0330041
Chr1	27520001	27540000	0.4326		Chr16	2600001	2800000	6.5e-05		Chr22	9600001	9800001	0.00301		Chr1	34602046	34618659	0.381119
Chr1	27540001	27560000	0.4341		Chr16	2800001	3000000	4e-05		Chr22	9800001	10000001	0.00283		Chr1	34620921	34623690	0.0450179
Chr1	27560001	27580000	0.4354		Chr16	3000001	3200000	0.00014		Chr22	10000001	10200001	0.00306		Chr1	34626261	34628965	0.609737
Chr1	27580001	27600000	0.4337		Chr16	3200001	3400000	0.0001		Chr22	10200001	10400001	0.002925		Chr1	34630111	34656575	0.721114
Chr1	27600001	27620000	0.4347		Chr16	3400001	3600000	0.000105		Chr22	10400001	10600001	0.002475		Chr1	34662059	34664601	0.323735
Chr1	27620001	27640000	0.4371		Chr16	3600001	3800000	4e-05		Chr22	10600001	10800001	0.00275		Chr1	34667566	34672923	0.718115
Chr1	27640001	27660000	0.4402		Chr16	3800001	4000000	9e-05		Chr22	10800001	11000001	0.002835		Chr1	34687512	34704259	0.345433
Chr1	27660001	27680000	0.4409		Chr16	4000001	4200000	6.5e-05		Chr22	11000001	11200001	0.00356		Chr1	34729808	34740842	0.168866
Chr1	27680001	27700000	0.4418		Chr16	4200001	4400000	6e-05		Chr22	11200001	11400001	0.002835		Chr1	34744147	34750709	0.0865915
Chr1	27700001	27720000	0.4405		Chr16	4400001	4600000	2.5e-05		Chr22	11400001	11600001	0.00247		Chr1	34766210	34772171	0.451294
Chr1	27720001	27740000	0.4428		Chr16	4600001	4800000	5e-06		Chr22	11600001	11800001	0.0023		Chr1	34799117	34802772	0.578569
Chr1	27740001	27760000	0.4415		Chr16	4800001	5000000	6.5e-05		Chr22	11800001	12000001	0.002595		Chr1	34819295	34885572	0.267368
Chr1	27760001	27780000	0.4416		Chr16	5000001	5200000	0.00013		Chr22	12000001	12200001	0.00231		Chr1	34894210	34897793	0.16792
Chr1	27780001	27800000	0.4415		Chr16	5200001	5400000	6.5e-05		Chr22	12200001	12400001	0.002815		Chr1	34897694	34912547	0.980328
Chr1	27800001	27820000	0.439		Chr16	5400001	5600000	5e-05		Chr22	12400001	12600001	0.002785		Chr1	34913125	34924462	0.170093
Chr1	27820001	27840000	0.436		Chr16	5600001	5800000	0.000125		Chr22	12600001	12800001	0.002595		Chr1	34924776	34942795	0.82709
Chr1	27840001	27860000	0.4359		Chr16	5800001	6000000	8.5e-05		Chr22	12800001	13000001	0.002545		Chr1	34942990	34957828	0.914121
Chr1	27860001	27880000	0.4375		Chr16	6000001	6200000	3e-05		Chr22	13000001	13200001	0.00234		Chr1	34958099	34960270	0.230177
Chr1	27880001	27900000	0.4393		Chr16	6200001	6400000	0.00012		Chr22	13200001	13400001	0.00239		Chr1	34962055	34963706	0.0205737
Chr1	27900001	27920000	0.4417		Chr16	6400001	6600000	1e-05		Chr22	13400001	13600001	0.002055		Chr1	34964712	34967136	0.763687
Chr1	27920001	27940000	0.4407		Chr16	6600001	6800000	4e-05		Chr22	13600001	13800001	0.002125		Chr1	34967609	34968425	0.0431808
Chr1	27940001	27960000	0.4423		Chr16	6800001	7000000	4e-05		Chr22	13800001	14000001	0.002465		Chr1	34970956	34982706	0.193386
Chr1	27960001	27980000	0.4421		Chr16	7000001	7200000	1.5e-05		Chr22	14000001	14200001	0.002385		Chr1	34983113	34987267	0.0920611
Chr1	27980001	28000000	0.4417		Chr16	7200001	7400000	6e-05		Chr22	14200001	14400001	0.00228		Chr1	34988186	35001805	0.446161
Chr1	28000001	28020000	0.4433		Chr16	7400001	7600000	2.5e-05		Chr22	14400001	14600001	0.002585		Chr1	35003678	35005244	0.583215
Chr1	28020001	28040000	0.446		Chr16	7600001	7800000	5e-05		Chr22	14600001	14800001	0.00241		Chr1	35004181	35010937	0.77095
Chr1	28040001	28060000	0.4475		Chr16	7800001	8000000	8e-05		Chr22	14800001	15000001	0.002125		Chr1	35011968	35018919	0.126364
Chr1	28060001	28080000	0.4469		Chr16	8000001	8200000	9.5e-05		Chr22	15000001	15200001	0.002305		Chr1	35019758	35042201	0.730104
Chr1	28080001	28100000	0.4451		Chr16	8200001	8400000	0.000105		Chr22	15200001	15400001	0.0021		Chr1	35049832	35068986	0.0390989
Chr1	28100001	28120000	0.4434		Chr16	8400001	8600000	0.000105		Chr22	15400001	15600001	0.002605		Chr1	35068997	35072296	0.412901
Chr1	28120001	28140000	0.4402		Chr16	8600001	8800000	6e-05		Chr22	15600001	15800001	0.002185		Chr1	35073474	35082619	0.0301411
Chr1	28140001	28160000	0.441		Chr16	8800001	9000000	8e-05		Chr22	15800001	16000001	0.00275		Chr1	35083229	35086297	0.474266
Chr1	28160001	28180000	0.4442		Chr16	9000001	9200000	6.5e-05		Chr22	16000001	16200001	0.00228		Chr1	35086794	35096470	0.579051
Chr1	28180001	28200000	0.4484		Chr16	9200001	9400000	3e-05		Chr22	16200001	16400001	0.00378		Chr1	35097582	35119926	0.418157
Chr1	28200001	28220000	0.4504		Chr16	9400001	9600000	2.5e-05		Chr22	16400001	16600001	0.002855		Chr1	35121760	35147962	0.0594973
Chr1	28220001	28240000	0.4489		Chr16	9600001	9800000	2.5e-05		Chr22	16600001	16800001	0.002835		Chr1	35154468	35165474	0.499095
Chr1	28240001	28260000	0.4452		Chr16	9800001	10000000	1e-05		Chr22	16800001	17000001	0.003		Chr1	35167890	35173534	0.565943
Chr1	28260001	28280000	0.4445		Chr16	10000001	10200000	3e-05		Chr22	17000001	17200001	0.00347		Chr1	35172002	35179054	0.444601
Chr1	28280001	28300000	0.4444		Chr16	10200001	10400000	5.5e-05		Chr22	17200001	17400001	0.00305		Chr1	35179158	35197603	0.391057
Chr1	28300001	28320000	0.4442		Chr16	10400001	10600000	3e-05		Chr22	17400001	17600001	0.002295		Chr1	35196086	35200660	0.188252
Chr1	28320001	28340000	0.4458		Chr16	10600001	10800000	0.000115		Chr22	17600001	17800001	0.002025		Chr1	35203081	35218092	0.324327
Chr1	28340001	28360000	0.4417		Chr16	10800001	11000000	7.5e-05		Chr22	17800001	18000001	0.003105		Chr1	35221377	35239719	0.931494
Chr1	28360001	28380000	0.4374		Chr16	11000001	11200000	4e-05		Chr22	18000001	18200001	0.003425		Chr1	35239954	35245473	0.304045
Chr1	28380001	28400000	0.4339		Chr16	11200001	11400000	5.5e-05		Chr22	18200001	18400001	0.003305		Chr1	35244745	35251530	0.589345
Chr1	28400001	28420000	0.4307		Chr16	11400001	11600000	3e-05		Chr22	18400001	18600001	0.00339		Chr1	35251873	35280751	0.676061
Chr1	28420001	28440000	0.4292		Chr16	11600001	11800000	4e-05		Chr22	18600001	18800001	0.00284		Chr1	35283459	35303292	0.613483
Chr1	28440001	28460000	0.4284		Chr16	11800001	12000000	6.5e-05		Chr22	18800001	19000001	0.00205		Chr1	35311262	35320332	0.473169
Chr1	28460001	28480000	0.4272		Chr16	12000001	12200000	2.5e-05		Chr22	19000001	19200001	0.00183		Chr1	35321787	35330081	0.736741
Chr1	28480001	28500000	0.4268		Chr16	12200001	12400000	1.5e-05		Chr22	19200001	19400001	0.00199		Chr1	35336346	35354036	0.139798
Chr1	28500001	28520000	0.4274		Chr16	12400001	12600000	4e-05		Chr22	19400001	19600001	0.00175		Chr1	35357338	35367496	0.131172
Chr1	28520001	28540000	0.4283		Chr16	12600001	12800000	5.5e-05		Chr22	19600001	19800001	0.001785		Chr1	35367711	35370449	0.379616
Chr1	28540001	28560000	0.4295		Chr16	12800001	13000000	2.5e-05		Chr22	19800001	20000001	0.00249		Chr1	35382202	35397704	0.00582763
Chr1	28560001	28580000	0.431		Chr16	13000001	13200000	2.5e-05		Chr22	20000001	20200001	0.00204		Chr1	35405166	35410697	0.617992
Chr1	28580001	28600000	0.4333		Chr16	13200001	13400000	1e-05		Chr22	20200001	20400001	0.002		Chr1	35412031	35420512	0.127295
Chr1	28600001	28620000	0.4344		Chr16	13400001	13600000	1e-05		Chr22	20400001	20600001	0.002165		Chr1	35421529	35431182	0.0499307
Chr1	28620001	28640000	0.435		Chr16	13600001	13800000	1.5e-05		Chr22	20600001	20800001	0.002195		Chr1	35432741	35447083	0.119586
Chr1	28640001	28660000	0.4349		Chr16	13800001	14000000	5e-06		Chr22	20800001	21000001	0.002315		Chr1	35450783	35461826	0.396302
Chr1	28660001	28680000	0.4374		Chr16	14000001	14200000	2.5e-05		Chr22	21000001	21200001	0.002205		Chr1	35460827	35469743	0.725058
Chr1	28680001	28700000	0.4377		Chr16	14200001	14400000	2e-05		Chr22	21200001	21400001	0.00215		Chr1	35487028	35489230	0.552341
Chr1	28700001	28720000	0.4415		Chr16	14400001	14600000	3.5e-05		Chr22	21400001	21600001	0.002355		Chr1	35491241	35497148	0.2371
Chr1	28720001	28740000	0.4451		Chr16	14600001	14800000	3.5e-05		Chr22	21600001	21800001	0.00212		Chr1	35504997	35508162	0.0628143
Chr1	28740001	28760000	0.4469		Chr17	1	200000	1.5e-05		Chr22	21800001	22000001	0.002145		Chr1	35511942	35513808	0.306584
Chr1	28760001	28780000	0.4486		Chr17	200001	400000	2.5e-05		Chr22	22000001	22200001	0.00208		Chr1	35513251	35521300	0.48928
Chr1	28780001	28800000	0.4488		Chr17	400001	600000	3e-05		Chr22	22200001	22400001	0.002045		Chr1	35524269	35525716	0.424083
Chr1	28800001	28820000	0.4514		Chr17	600001	800000	3.5e-05		Chr22	22400001	22600001	0.002445		Chr1	35546067	35548715	0.874587
Chr1	28820001	28840000	0.4524		Chr17	800001	1000000	4e-05		Chr22	22600001	22800001	0.00181		Chr1	35546263	35565627	0.309438
Chr1	28840001	28860000	0.4552		Chr17	1000001	1200000	8e-05		Chr22	22800001	23000001	0.00204		Chr1	35566977	35623098	0.0363607
Chr1	28860001	28880000	0.4544		Chr17	1200001	1400000	3.5e-05		Chr22	23000001	23200001	0.00212		Chr1	35624724	35627765	0.311116
Chr1	28880001	28900000	0.4556		Chr17	1400001	1600000	4e-05		Chr22	23200001	23400001	0.002365		Chr1	35629173	35650690	0.329919
Chr1	28900001	28920000	0.4527		Chr17	1600001	1800000	1.5e-05		Chr22	23400001	23600001	0.00204		Chr1	35650666	35653298	0.646442
Chr1	28920001	28940000	0.451		Chr17	1800001	2000000	0		Chr22	23600001	23800001	0.002305		Chr1	35653568	35658711	0.773815
Chr1	28940001	28960000	0.4504		Chr17	2000001	2200000	2.5e-05		Chr22	23800001	24000001	0.00156		Chr1	35659801	35664358	0.212509
Chr1	28960001	28980000	0.4464		Chr17	2200001	2400000	2.5e-05		Chr22	24000001	24200001	0.00185		Chr1	35666261	35681408	0.207535
Chr1	28980001	29000000	0.4454		Chr17	2400001	2600000	3.5e-05		Chr22	24200001	24399998	0.00258		Chr1	35684530	35701104	0.830409
Chr1	29000001	29020000	0.4436		Chr17	2600001	2800000	5e-06		Chr3	1	200001	0.00245		Chr1	35704206	35710471	0.264905
Chr1	29020001	29040000	0.443		Chr17	2800001	3000000	5e-06		Chr3	200001	400001	0.00287		Chr1	35712999	35719937	0.267938
Chr1	29040001	29060000	0.4425		Chr17	3000001	3200000	4e-05		Chr3	400001	600001	0.002995		Chr1	35724361	35733064	0.773772
Chr1	29060001	29080000	0.4409		Chr17	3200001	3400000	6e-05		Chr3	600001	800001	0.003285		Chr1	35734760	35752226	0.154684
Chr1	29080001	29100000	0.4399		Chr17	3400001	3600000	0		Chr3	800001	1000001	0.003185		Chr1	35759542	35763047	0.162314
Chr1	29100001	29120000	0.4402		Chr17	3600001	3800000	1.5e-05		Chr3	1000001	1200001	0.003405		Chr1	35763238	35769202	0.18321
Chr1	29120001	29140000	0.4377		Chr17	3800001	4000000	5e-05		Chr3	1200001	1400001	0.003465		Chr1	35770439	35777442	0.689656
Chr1	29140001	29160000	0.4381		Chr17	4000001	4200000	5e-05		Chr3	1400001	1600001	0.0033		Chr1	35777562	35784405	0.642833
Chr1	29160001	29180000	0.442		Chr17	4200001	4400000	9e-05		Chr3	1600001	1800001	0.003105		Chr1	35789747	35795107	0.456788
Chr1	29180001	29200000	0.4437		Chr17	4400001	4600000	7.5e-05		Chr3	1800001	2000001	0.003055		Chr1	35796234	35810982	0.468718
Chr1	29200001	29220000	0.4428		Chr17	4600001	4800000	1.5e-05		Chr3	2000001	2200001	0.0017		Chr1	35812721	35823438	0.203565
Chr1	29220001	29240000	0.4425		Chr17	4800001	5000000	1e-05		Chr3	2200001	2400001	0.00175		Chr1	35824778	35831491	0.011942
Chr1	29240001	29260000	0.4387		Chr17	5000001	5200000	4.5e-05		Chr3	2400001	2600001	0.001805		Chr1	35838382	35842730	0.540152
Chr1	29260001	29280000	0.4384		Chr17	5200001	5400000	2e-05		Chr3	2600001	2800001	0.001615		Chr1	35843270	35860079	0.00105574
Chr1	29280001	29300000	0.4412		Chr17	5400001	5600000	3e-05		Chr3	2800001	3000001	0.001995		Chr1	35861953	35866682	0.89345
Chr1	29300001	29320000	0.4398		Chr17	5600001	5800000	1.5e-05		Chr3	3000001	3200001	0.002845		Chr1	35866749	35869146	0.271839
Chr1	29320001	29340000	0.4407		Chr17	5800001	6000000	6e-05		Chr3	3200001	3400001	0.00282		Chr1	35871307	35880829	0.4605
Chr1	29340001	29360000	0.4403		Chr17	6000001	6200000	4e-05		Chr3	3400001	3600001	0.002455		Chr1	35881171	35888931	0.811237
Chr1	29360001	29380000	0.4381		Chr17	6200001	6400000	0.00011		Chr3	3600001	3800001	0.00263		Chr1	35899365	35904531	0.699658
Chr1	29380001	29400000	0.4346		Chr17	6400001	6600000	6.5e-05		Chr3	3800001	4000001	0.002815		Chr1	35923976	35931723	0.958898
Chr1	29400001	29420000	0.4331		Chr17	6600001	6800000	6e-05		Chr3	4000001	4200001	0.002285		Chr1	35934621	35975857	0.364439
Chr1	29420001	29440000	0.4329		Chr17	6800001	7000000	5e-05		Chr3	4200001	4400001	0.002035		Chr2	2390	26704	0.530463
Chr1	29440001	29460000	0.4368		Chr17	7000001	7200000	5e-05		Chr3	4400001	4600001	0.002385		Chr2	28367	36254	0.956407
Chr1	29460001	29480000	0.4375		Chr17	7200001	7400000	6e-05		Chr3	4600001	4800001	0.002495		Chr2	39009	49622	0.388358
Chr1	29480001	29500000	0.4342		Chr17	7400001	7600000	7.5e-05		Chr3	4800001	5000001	0.001755		Chr2	48529	64744	0.719702
Chr1	29500001	29520000	0.4344		Chr17	7600001	7800000	7.5e-05		Chr3	5000001	5200001	0.00191		Chr2	75988	83787	0.202097
Chr1	29520001	29540000	0.4324		Chr17	7800001	8000000	0.000105		Chr3	5200001	5400001	0.003485		Chr2	85926	92549	0.743265
Chr1	29540001	29560000	0.4309		Chr17	8000001	8200000	5.5e-05		Chr3	5400001	5600001	0.002985		Chr2	95071	149993	0.321081
Chr1	29560001	29580000	0.4299		Chr17	8200001	8400000	6.5e-05		Chr3	5600001	5800001	0.00341		Chr2	161454	172947	0.517252
Chr1	29580001	29600000	0.4297		Chr17	8400001	8600000	6e-05		Chr3	5800001	6000001	0.003195		Chr2	190107	200123	0.794129
Chr1	29600001	29620000	0.4267		Chr17	8600001	8800000	7e-05		Chr3	6000001	6200001	0.00283		Chr2	268681	278256	0.476317
Chr1	29620001	29640000	0.4238		Chr17	8800001	9000000	6.5e-05		Chr3	6200001	6400001	0.002685		Chr2	312888	322876	0.717059
Chr1	29640001	29660000	0.4206		Chr17	9000001	9200000	4.5e-05		Chr3	6400001	6600001	0.002935		Chr2	321705	325183	0.147701
Chr1	29660001	29680000	0.419		Chr17	9200001	9400000	4.5e-05		Chr3	6600001	6800001	0.003395		Chr2	325268	331716	0.226698
Chr1	29680001	29700000	0.4196		Chr17	9400001	9600000	1e-05		Chr3	6800001	7000001	0.00316		Chr2	332232	333975	0.0458417
Chr1	29700001	29720000	0.4196		Chr17	9600001	9800000	0		Chr3	7000001	7200001	0.00236		Chr2	334306	354930	0.0255925
Chr1	29720001	29740000	0.419		Chr17	9800001	10000000	6e-05		Chr3	7200001	7400001	0.00213		Chr2	355212	366226	0.10361
Chr1	29740001	29760000	0.4181		Chr17	10000001	10200000	6.5e-05		Chr3	7400001	7600001	0.002655		Chr2	367584	371291	0.921086
Chr1	29760001	29780000	0.4204		Chr17	10200001	10400000	5e-05		Chr3	7600001	7800001	0.00177		Chr2	372378	376516	0.980263
Chr1	29780001	29800000	0.4215		Chr17	10400001	10600000	6.5e-05		Chr3	7800001	8000001	0.001885		Chr2	376661	380370	0.659536
Chr1	29800001	29820000	0.4259		Chr17	10600001	10800000	3e-05		Chr3	8000001	8200001	0.001715		Chr2	380661	387996	0.0586793
Chr1	29820001	29840000	0.4305		Chr17	10800001	11000000	0.0001		Chr3	8200001	8400001	0.002095		Chr2	389962	405921	0.0391927
Chr1	29840001	29860000	0.4331		Chr17	11000001	11200000	7.5e-05		Chr3	8400001	8600001	0.0019		Chr2	411309	417142	0.0750442
Chr1	29860001	29880000	0.4322		Chr17	11200001	11400000	1e-05		Chr3	8600001	8800001	0.00194		Chr2	419856	453082	0.0363619
Chr1	29880001	29900000	0.4328		Chr17	11400001	11600000	6e-05		Chr3	8800001	9000001	0.001745		Chr2	456265	457891	0.658319
Chr1	29900001	29920000	0.43		Chr17	11600001	11800000	4e-05		Chr3	9000001	9200001	0.001685		Chr2	593618	597208	0.653855
Chr1	29920001	29940000	0.4314		Chr17	11800001	12000000	7.5e-05		Chr3	9200001	9400001	0.001865		Chr2	630367	649068	0.729527
Chr1	29940001	29960000	0.4334		Chr17	12000001	12200000	4e-05		Chr3	9400001	9600001	0.002305		Chr2	630367	636988	0.0566363
Chr1	29960001	29980000	0.4303		Chr17	12200001	12400000	5e-06		Chr3	9600001	9800001	0.002065		Chr2	650565	661399	0.00610354
Chr1	29980001	30000000	0.4289		Chr17	12400001	12600000	2e-05		Chr3	9800001	10000001	0.00202		Chr2	665235	669544	0.505724
Chr1	30000001	30020000	0.4278		Chr17	12600001	12800000	4e-05		Chr3	10000001	10200001	0.0019		Chr2	675050	791331	0.0254036
Chr1	30020001	30040000	0.4274		Chr17	12800001	13000000	3e-05		Chr3	10200001	10400001	0.0019		Chr2	794279	801247	0.234394
Chr1	30040001	30060000	0.4241		Chr17	13000001	13200000	3e-05		Chr3	10400001	10600001	0.00248		Chr2	802874	815837	0.0142365
Chr1	30060001	30080000	0.4239		Chr17	13200001	13400000	3e-05		Chr3	10600001	10800001	0.00227		Chr2	816740	831895	0.8421
Chr1	30080001	30100000	0.4224		Chr17	13400001	13600000	2.5e-05		Chr3	10800001	11000001	0.002255		Chr2	834520	845893	0.619303
Chr1	30100001	30120000	0.4252		Chr17	13600001	13800000	3e-05		Chr3	11000001	11200001	0.002405		Chr2	847157	858906	0.16499
Chr1	30120001	30140000	0.4247		Chr17	13800001	14000000	3.5e-05		Chr3	11200001	11400001	0.002195		Chr2	910039	920592	0.0887794
Chr1	30140001	30160000	0.4232		Chr17	14000001	14200000	2e-05		Chr3	11400001	11600001	0.002195		Chr2	934518	964963	0.926422
Chr1	30160001	30180000	0.4242		Chr17	14200001	14400000	1e-05		Chr3	11600001	11800001	0.001975		Chr2	980645	982461	0.851131
Chr1	30180001	30200000	0.4256		Chr17	14400001	14600000	3e-05		Chr3	11800001	12000001	0.001875		Chr2	1151433	1158870	0.0261995
Chr1	30200001	30220000	0.426		Chr17	14600001	14800000	1e-05		Chr3	12000001	12200001	0.002345		Chr2	1198515	1203941	0.914482
Chr1	30220001	30240000	0.4266		Chr17	14800001	15000000	1e-05		Chr3	12200001	12400001	0.00238		Chr2	1248333	1343753	0.0408707
Chr1	30240001	30260000	0.428		Chr17	15000001	15200000	1e-05		Chr3	12400001	12600001	0.00275		Chr2	1348822	1388861	0.400198
Chr1	30260001	30280000	0.4292		Chr17	15200001	15400000	3e-05		Chr3	12600001	12800001	0.00281		Chr2	1392047	1420267	0.166894
Chr1	30280001	30300000	0.4284		Chr17	15400001	15600000	4.5e-05		Chr3	12800001	13000001	0.002685		Chr2	1423748	1427052	0.224904
Chr1	30300001	30320000	0.4307		Chr17	15600001	15800000	4e-05		Chr3	13000001	13200001	0.002635		Chr2	1427526	1432653	0.189157
Chr1	30320001	30340000	0.4313		Chr17	15800001	16000000	6e-05		Chr3	13200001	13400001	0.00295		Chr2	1431048	1434078	0.320801
Chr1	30340001	30360000	0.4336		Chr17	16000001	16200000	6.5e-05		Chr3	13400001	13600001	0.002385		Chr2	1434541	1451785	0.25931
Chr1	30360001	30380000	0.432		Chr17	16200001	16400000	3.5e-05		Chr3	13600001	13800001	0.00255		Chr2	1451423	1455230	1
Chr1	30380001	30400000	0.4301		Chr17	16400001	16600000	3e-05		Chr3	13800001	14000001	0.002625		Chr2	1455158	1459158	0.710029
Chr1	30400001	30420000	0.4283		Chr17	16600001	16800000	4.5e-05		Chr3	14000001	14200001	0.002705		Chr2	1469706	1495730	0.332569
Chr1	30420001	30440000	0.4253		Chr17	16800001	17000000	8.5e-05		Chr3	14200001	14400001	0.002335		Chr2	1539371	1565363	0.920186
Chr1	30440001	30460000	0.423		Chr17	17000001	17200000	0.00011		Chr3	14400001	14600001	0.002385		Chr2	1604145	1621478	0.0428572
Chr1	30460001	30480000	0.4237		Chr17	17200001	17400000	0.000115		Chr3	14600001	14800001	0.00231		Chr2	1687915	1905130	0.0729324
Chr1	30480001	30500000	0.4234		Chr17	17400001	17600000	8e-05		Chr3	14800001	15000001	0.00237		Chr2	2137643	2198935	0.579396
Chr1	30500001	30520000	0.4194		Chr17	17600001	17800000	0.0001		Chr3	15000001	15200001	0.00274		Chr2	2236371	2248565	0.760827
Chr1	30520001	30540000	0.4188		Chr17	17800001	18000000	7e-05		Chr3	15200001	15400001	0.002325		Chr2	2348028	2403301	0.630099
Chr1	30540001	30560000	0.4173		Chr17	18000001	18200000	1.5e-05		Chr3	15400001	15600001	0.00214		Chr2	2409536	2425341	0.40844
Chr1	30560001	30580000	0.4176		Chr17	18200001	18400000	1.5e-05		Chr3	15600001	15800001	0.001855		Chr2	2473789	2475387	0.0688071
Chr1	30580001	30600000	0.4196		Chr17	18400001	18600000	5.5e-05		Chr3	15800001	16000001	0.00218		Chr2	2475291	2482219	0.816187
Chr1	30600001	30620000	0.4195		Chr17	18600001	18800000	8e-05		Chr3	16000001	16200001	0.002825		Chr2	2487264	2500557	0.0703616
Chr1	30620001	30640000	0.4211		Chr17	18800001	19000000	0.000135		Chr3	16200001	16400001	0.00245		Chr2	2501308	2503888	0.928164
Chr1	30640001	30660000	0.4221		Chr17	19000001	19200000	0.000115		Chr3	16400001	16600001	0.00261		Chr2	2503909	2505477	0.817431
Chr1	30660001	30680000	0.4228		Chr17	19200001	19400000	0.000105		Chr3	16600001	16800001	0.00186		Chr2	2509219	2514953	0.312737
Chr1	30680001	30700000	0.4249		Chr17	19400001	19600000	6.5e-05		Chr3	16800001	17000001	0.00175		Chr2	2515027	2515833	0.451005
Chr1	30700001	30720000	0.4252		Chr17	19600001	19800000	9e-05		Chr3	17000001	17200001	0.00195		Chr2	2517504	2522223	0.854048
Chr1	30720001	30740000	0.4239		Chr17	19800001	20000000	2.5e-05		Chr3	17200001	17400001	0.00187		Chr2	2523776	2528368	0.281548
Chr1	30740001	30760000	0.4237		Chr17	20000001	20200000	5e-06		Chr3	17400001	17600001	0.00216		Chr2	2528399	2541079	0.247295
Chr1	30760001	30780000	0.425		Chr17	20200001	20400000	3e-05		Chr3	17600001	17800001	0.00217		Chr2	2543119	2551486	0.457591
Chr1	30780001	30800000	0.4244		Chr17	20400001	20600000	4e-05		Chr3	17800001	18000001	0.00194		Chr2	2552282	2561389	0.947826
Chr1	30800001	30820000	0.4259		Chr17	20600001	20800000	6e-05		Chr3	18000001	18200001	0.00234		Chr2	2562052	2565423	0.0112013
Chr1	30820001	30840000	0.4251		Chr17	20800001	21000000	1.5e-05		Chr3	18200001	18400001	0.002285		Chr2	2566612	2592971	0.606056
Chr1	30840001	30860000	0.4259		Chr17	21000001	21200000	1.5e-05		Chr3	18400001	18600001	0.002105		Chr2	2593543	2594707	0.309839
Chr1	30860001	30880000	0.4243		Chr17	21200001	21400000	5e-06		Chr3	18600001	18800001	0.00157		Chr2	2594758	2598134	0.038747
Chr1	30880001	30900000	0.4234		Chr17	21400001	21600000	5e-05		Chr3	18800001	19000001	0.001875		Chr2	2598148	2605860	0.599245
Chr1	30900001	30920000	0.424		Chr17	21600001	21800000	4e-05		Chr3	19000001	19200001	0.002045		Chr2	2599435	2601201	0.668552
Chr1	30920001	30940000	0.4254		Chr17	21800001	22000000	3.5e-05		Chr3	19200001	19400001	0.00213		Chr2	2605813	2615225	0.780177
Chr1	30940001	30960000	0.4273		Chr17	22000001	22200000	2e-05		Chr3	19400001	19600001	0.001995		Chr2	2615862	2617366	0.181985
Chr1	30960001	30980000	0.4272		Chr17	22200001	22400000	0		Chr3	19600001	19800001	0.002285		Chr2	2617946	2627302	0.966938
Chr1	30980001	31000000	0.4271		Chr17	22400001	22600000	3e-05		Chr3	19800001	20000001	0.00162		Chr2	2628646	2634744	0.0261626
Chr1	31000001	31020000	0.4255		Chr17	22600001	22800000	3e-05		Chr3	20000001	20200001	0.002315		Chr2	2635088	2640684	0.865497
Chr1	31020001	31040000	0.4253		Chr17	22800001	23000000	3e-05		Chr3	20200001	20400001	0.00229		Chr2	2645386	2651794	0.465541
Chr1	31040001	31060000	0.4245		Chr17	23000001	23200000	0		Chr3	20400001	20600001	0.002055		Chr2	2657975	2663384	0.276871
Chr1	31060001	31080000	0.4249		Chr18	1	200000	6.5e-05		Chr3	20600001	20800001	0.001795		Chr2	2666835	2670743	0.0348985
Chr1	31080001	31100000	0.4247		Chr18	200001	400000	1.5e-05		Chr3	20800001	21000001	0.002		Chr2	2668950	2676005	0.813429
Chr1	31100001	31120000	0.4247		Chr18	400001	600000	2e-05		Chr3	21000001	21200001	0.002285		Chr2	2676238	2678490	0.0678216
Chr1	31120001	31140000	0.4252		Chr18	600001	800000	5e-05		Chr3	21200001	21400001	0.002755		Chr2	2678830	2682059	0.738569
Chr1	31140001	31160000	0.4255		Chr18	800001	1000000	4.5e-05		Chr3	21400001	21600001	0.00237		Chr2	2683992	2696608	0.412793
Chr1	31160001	31180000	0.4265		Chr18	1000001	1200000	5e-05		Chr3	21600001	21800001	0.002275		Chr2	2698908	2700311	0.651108
Chr1	31180001	31200000	0.4277		Chr18	1200001	1400000	2e-05		Chr3	21800001	22000001	0.002565		Chr2	2706022	2706543	0.7405
Chr1	31200001	31220000	0.4286		Chr18	1400001	1600000	4.5e-05		Chr3	22000001	22200001	0.002325		Chr2	2711943	2725617	0.110433
Chr1	31220001	31240000	0.429		Chr18	1600001	1800000	2.5e-05		Chr3	22200001	22400001	0.002515		Chr2	2723306	2732649	0.335324
Chr1	31240001	31260000	0.4294		Chr18	1800001	2000000	1e-05		Chr3	22400001	22600001	0.002585		Chr2	2733947	2759056	0.00275482
Chr1	31260001	31280000	0.4294		Chr18	2000001	2200000	2e-05		Chr3	22600001	22800001	0.00259		Chr2	2760568	2769865	0.183279
Chr1	31280001	31300000	0.4301		Chr18	2200001	2400000	2e-05		Chr3	22800001	22949005	0.001725		Chr2	2769829	2772020	0.0317827
Chr1	31300001	31320000	0.4304		Chr18	2400001	2600000	1.5e-05		Chr4	1	200001	0.001455		Chr2	2772356	2775908	0.0685742
Chr1	31320001	31340000	0.4308		Chr18	2600001	2800000	3e-05		Chr4	200001	400001	0.001365		Chr2	2776555	2778501	0.527158
Chr1	31340001	31360000	0.4293		Chr18	2800001	3000000	3.5e-05		Chr4	400001	600001	0.001035		Chr2	2781738	2786583	0.552963
Chr1	31360001	31380000	0.4298		Chr18	3000001	3200000	0.00016		Chr4	600001	800001	0.001435		Chr2	2786792	2790266	0.98646
Chr1	31380001	31400000	0.4312		Chr18	3200001	3400000	0.000105		Chr4	800001	1000001	0.001545		Chr2	2792299	2801859	0.72414
Chr1	31400001	31420000	0.4316		Chr18	3400001	3600000	0.00014		Chr4	1000001	1200001	0.00134		Chr2	2802400	2809093	0.738959
Chr1	31420001	31440000	0.4315		Chr18	3600001	3800000	8e-05		Chr4	1200001	1400001	0.001055		Chr2	2809565	2812414	0.763135
Chr1	31440001	31460000	0.4318		Chr18	3800001	4000000	3e-05		Chr4	1400001	1600001	0.001635		Chr2	2813066	2816585	0.0838547
Chr1	31460001	31480000	0.4351		Chr18	4000001	4200000	7.5e-05		Chr4	1600001	1800001	0.00138		Chr2	2814900	2818662	0.533252
Chr1	31480001	31500000	0.4334		Chr18	4200001	4400000	5.5e-05		Chr4	1800001	2000001	0.001505		Chr2	2819051	2827630	0.0161666
Chr1	31500001	31520000	0.4327		Chr18	4400001	4600000	8e-05		Chr4	2000001	2200001	0.001605		Chr2	2826079	2831144	0.142834
Chr1	31520001	31540000	0.4302		Chr18	4600001	4800000	4e-05		Chr4	2200001	2400001	0.00215		Chr2	2849760	2881112	0.420038
Chr1	31540001	31560000	0.4319		Chr18	4800001	5000000	7.5e-05		Chr4	2400001	2600001	0.001925		Chr2	2884947	2888048	0.819629
Chr1	31560001	31580000	0.4278		Chr18	5000001	5200000	7e-05		Chr4	2600001	2800001	0.00183		Chr2	2888855	2891410	0.408489
Chr1	31580001	31600000	0.4238		Chr18	5200001	5400000	5e-05		Chr4	2800001	3000001	0.001945		Chr2	2896851	2912901	0.830627
Chr1	31600001	31620000	0.4217		Chr18	5400001	5600000	3e-05		Chr4	3000001	3200001	0.00219		Chr2	2913146	2916832	0.347093
Chr1	31620001	31640000	0.4216		Chr18	5600001	5800000	2.5e-05		Chr4	3200001	3400001	0.001905		Chr2	2914577	2921496	0.62653
Chr1	31640001	31660000	0.421		Chr18	5800001	6000000	3.5e-05		Chr4	3400001	3600001	0.00185		Chr2	2922243	2924858	0.139152
Chr1	31660001	31680000	0.4173		Chr18	6000001	6200000	8.5e-05		Chr4	3600001	3800001	0.002355		Chr2	2925104	2931611	0.972667
Chr1	31680001	31700000	0.4175		Chr18	6200001	6400000	4.5e-05		Chr4	3800001	4000001	0.00221		Chr2	2933833	2938943	0.504891
Chr1	31700001	31720000	0.4181		Chr18	6400001	6600000	4.5e-05		Chr4	4000001	4200001	0.002415		Chr2	2939870	2949209	0.186658
Chr1	31720001	31740000	0.4196		Chr18	6600001	6800000	6.5e-05		Chr4	4200001	4400001	0.00275		Chr2	2949826	2953852	0.366877
Chr1	31740001	31760000	0.4161		Chr18	6800001	7000000	9.5e-05		Chr4	4400001	4600001	0.001785		Chr2	2954067	2962419	0.325047
Chr1	31760001	31780000	0.4154		Chr18	7000001	7200000	0.000105		Chr4	4600001	4800001	0.00188		Chr2	2963479	2973394	0.573818
Chr1	31780001	31800000	0.4165		Chr18	7200001	7400000	2.5e-05		Chr4	4800001	5000001	0.001745		Chr2	2975645	2989643	0.369361
Chr1	31800001	31820000	0.4186		Chr18	7400001	7600000	7.5e-05		Chr4	5000001	5200001	0.001825		Chr2	2991002	2994596	0.28742
Chr1	31820001	31840000	0.4178		Chr18	7600001	7800000	8.5e-05		Chr4	5200001	5400001	0.001585		Chr2	2994315	2998234	0.755917
Chr1	31840001	31860000	0.4164		Chr18	7800001	8000000	5.5e-05		Chr4	5400001	5600001	0.001165		Chr2	3006291	3015568	0.0651629
Chr1	31860001	31880000	0.4183		Chr18	8000001	8200000	2.5e-05		Chr4	5600001	5800001	0.00157		Chr2	3019282	3024821	0.489949
Chr1	31880001	31900000	0.4171		Chr18	8200001	8400000	9.5e-05		Chr4	5800001	6000001	0.001645		Chr2	3029702	3039716	0.53343
Chr1	31900001	31920000	0.4164		Chr18	8400001	8600000	9e-05		Chr4	6000001	6200001	0.0015		Chr2	3054263	3057850	0.131244
Chr1	31920001	31940000	0.4164		Chr18	8600001	8800000	5e-05		Chr4	6200001	6400001	0.00212		Chr2	3061656	3063421	0.411024
Chr1	31940001	31960000	0.4171		Chr18	8800001	9000000	3e-05		Chr4	6400001	6600001	0.001615		Chr2	3069037	3079307	0.542931
Chr1	31960001	31980000	0.4207		Chr18	9000001	9200000	8e-05		Chr4	6600001	6800001	0.001775		Chr2	3080080	3081833	0.2634
Chr1	31980001	32000000	0.4212		Chr18	9200001	9400000	7.5e-05		Chr4	6800001	7000001	0.0018		Chr2	3081447	3083401	0.570751
Chr1	32000001	32020000	0.4224		Chr18	9400001	9600000	7e-05		Chr4	7000001	7200001	0.002255		Chr2	3083915	3092897	0.232207
Chr1	32020001	32040000	0.4262		Chr18	9600001	9800000	6.5e-05		Chr4	7200001	7400001	0.00221		Chr2	3089452	3095176	0.987185
Chr1	32040001	32060000	0.429		Chr18	9800001	10000000	4e-05		Chr4	7400001	7600001	0.00202		Chr2	3095357	3099439	0.134543
Chr1	32060001	32080000	0.4268		Chr18	10000001	10200000	3.5e-05		Chr4	7600001	7800001	0.001655		Chr2	3102239	3103361	0.251424
Chr1	32080001	32100000	0.4284		Chr18	10200001	10400000	4e-05		Chr4	7800001	8000001	0.001545		Chr2	3104180	3115830	0.0541776
Chr1	32100001	32120000	0.4311		Chr18	10400001	10600000	5e-05		Chr4	8000001	8200001	0.00198		Chr2	3116202	3119993	0.835997
Chr1	32120001	32140000	0.4316		Chr18	10600001	10800000	8.5e-05		Chr4	8200001	8400001	0.00173		Chr2	3119019	3123248	0.9879
Chr1	32140001	32160000	0.4328		Chr18	10800001	11000000	3e-05		Chr4	8400001	8600001	0.00194		Chr2	3124506	3130922	0.762125
Chr1	32160001	32180000	0.4328		Chr18	11000001	11200000	4.5e-05		Chr4	8600001	8800001	0.001815		Chr2	3135753	3140144	0.0392139
Chr1	32180001	32200000	0.4346		Chr18	11200001	11400000	5e-05		Chr4	8800001	9000001	0.001835		Chr2	3141568	3145795	0.863018
Chr1	32200001	32220000	0.4328		Chr18	11400001	11600000	1.5e-05		Chr4	9000001	9200001	0.002165		Chr2	3146705	3156811	0.0599312
Chr1	32220001	32240000	0.4301		Chr18	11600001	11800000	4e-05		Chr4	9200001	9400001	0.00162		Chr2	3157948	3161395	0.152339
Chr1	32240001	32260000	0.4301		Chr18	11800001	12000000	3.5e-05		Chr4	9400001	9600001	0.00207		Chr2	3184688	3197930	0.959663
Chr1	32260001	32280000	0.431		Chr18	12000001	12200000	2e-05		Chr4	9600001	9800001	0.001855		Chr2	3198862	3207801	0.959474
Chr1	32280001	32300000	0.429		Chr18	12200001	12400000	4.5e-05		Chr4	9800001	10000001	0.001875		Chr2	3208540	3223295	0.468196
Chr1	32300001	32320000	0.4284		Chr18	12400001	12600000	7e-05		Chr4	10000001	10200001	0.002215		Chr2	3223296	3228764	0.716585
Chr1	32320001	32340000	0.4291		Chr18	12600001	12800000	0		Chr4	10200001	10400001	0.00162		Chr2	3230064	3237049	0.441726
Chr1	32340001	32360000	0.4288		Chr18	12800001	13000000	1.5e-05		Chr4	10400001	10600001	0.00198		Chr2	3240771	3249541	0.763796
Chr1	32360001	32380000	0.4289		Chr18	13000001	13200000	5.5e-05		Chr4	10600001	10800001	0.001965		Chr2	3250814	3252197	0.195337
Chr1	32380001	32400000	0.4273		Chr18	13200001	13400000	2.5e-05		Chr4	10800001	11000001	0.002665		Chr2	3254173	3258947	0.809615
Chr1	32400001	32420000	0.428		Chr18	13400001	13600000	6e-05		Chr4	11000001	11200001	0.002195		Chr2	3259563	3262050	0.138861
Chr1	32420001	32440000	0.4279		Chr18	13600001	13800000	4.5e-05		Chr4	11200001	11400001	0.002055		Chr2	3260597	3273567	0.687924
Chr1	32440001	32460000	0.4266		Chr18	13800001	14000000	4e-05		Chr4	11400001	11600001	0.002225		Chr2	3275031	3292400	0.935525
Chr1	32460001	32480000	0.4306		Chr18	14000001	14200000	4e-05		Chr4	11600001	11800001	0.002605		Chr2	3293127	3299051	0.903335
Chr1	32480001	32500000	0.4336		Chr18	14200001	14400000	5.5e-05		Chr4	11800001	12000001	0.00209		Chr2	3304005	3309024	0.0374768
Chr1	32500001	32520000	0.4331		Chr18	14400001	14600000	5.5e-05		Chr4	12000001	12200001	0.00222		Chr2	3314888	3318241	0.306625
Chr1	32520001	32540000	0.4309		Chr18	14600001	14800000	9.5e-05		Chr4	12200001	12400001	0.00252		Chr2	3328896	3331657	0.996808
Chr1	32540001	32560000	0.4307		Chr18	14800001	15000000	0		Chr4	12400001	12600001	0.0023		Chr2	3332046	3344746	0.272449
Chr1	32560001	32580000	0.4301		Chr18	15000001	15200000	5e-06		Chr4	12600001	12800001	0.00255		Chr2	3346807	3353800	0.422982
Chr1	32580001	32600000	0.4292		Chr18	15200001	15400000	1.5e-05		Chr4	12800001	13000001	0.002525		Chr2	3354165	3360419	0.449963
Chr1	32600001	32620000	0.4288		Chr18	15400001	15600000	2.5e-05		Chr4	13000001	13200001	0.00237		Chr2	3360962	3363492	0.827143
Chr1	32620001	32640000	0.4296		Chr18	15600001	15800000	3.5e-05		Chr4	13200001	13400001	0.002635		Chr2	3362528	3382044	0.536803
Chr1	32640001	32660000	0.4307		Chr18	15800001	16000000	2e-05		Chr4	13400001	13600001	0.002655		Chr2	3382564	3399810	0.266673
Chr1	32660001	32680000	0.4266		Chr18	16000001	16200000	4.5e-05		Chr4	13600001	13800001	0.00269		Chr2	3406864	3408700	0.00150771
Chr1	32680001	32700000	0.4247		Chr18	16200001	16400000	5e-06		Chr4	13800001	14000001	0.00287		Chr2	3413485	3429513	0.625141
Chr1	32700001	32720000	0.4238		Chr18	16400001	16600000	5e-06		Chr4	14000001	14200001	0.002635		Chr2	3433079	3471673	0.0695059
Chr1	32720001	32740000	0.4244		Chr18	16600001	16800000	3e-05		Chr4	14200001	14400001	0.002745		Chr2	3472447	3476733	0.552232
Chr1	32740001	32760000	0.4236		Chr18	16800001	17000000	2e-05		Chr4	14400001	14600001	0.002885		Chr2	3475650	3480141	0.136511
Chr1	32760001	32780000	0.4252		Chr18	17000001	17200000	2e-05		Chr4	14600001	14800001	0.002655		Chr2	3482163	3483885	0.843619
Chr1	32780001	32800000	0.4265		Chr18	17200001	17400000	3e-05		Chr4	14800001	15000001	0.002955		Chr2	3485422	3488626	0.00885495
Chr1	32800001	32820000	0.4265		Chr18	17400001	17600000	5e-06		Chr4	15000001	15200001	0.00296		Chr2	3491670	3498527	0.0547588
Chr1	32820001	32840000	0.4266		Chr18	17600001	17800000	0		Chr4	15200001	15400001	0.00237		Chr2	3498876	3527125	0.410072
Chr1	32840001	32860000	0.4284		Chr18	17800001	18000000	7.5e-05		Chr4	15400001	15600001	0.00292		Chr2	3528121	3532247	0.61115
Chr1	32860001	32880000	0.4298		Chr18	18000001	18200000	4.5e-05		Chr4	15600001	15800001	0.0031		Chr2	3533988	3536768	0.472824
Chr1	32880001	32900000	0.43		Chr18	18200001	18400000	5e-05		Chr4	15800001	16000001	0.00302		Chr2	3538134	3551669	0.729338
Chr1	32900001	32920000	0.4324		Chr18	18400001	18600000	2e-05		Chr4	16000001	16200001	0.00277		Chr2	3553720	3565820	0.0155602
Chr1	32920001	32940000	0.4334		Chr18	18600001	18800000	3.5e-05		Chr4	16200001	16400001	0.00298		Chr2	3566506	3568831	0.890143
Chr1	32940001	32960000	0.4365		Chr18	18800001	19000000	2.5e-05		Chr4	16400001	16600001	0.003215		Chr2	3568905	3571458	0.99563
Chr1	32960001	32980000	0.4335		Chr18	19000001	19200000	6e-05		Chr4	16600001	16800001	0.00261		Chr2	3571623	3577167	0.0354407
Chr1	32980001	33000000	0.4333		Chr18	19200001	19400000	1e-05		Chr4	16800001	17000001	0.0027		Chr2	3572692	3578717	0.378084
Chr1	33000001	33020000	0.4323		Chr18	19400001	19600000	2.5e-05		Chr4	17000001	17200001	0.003685		Chr2	3579317	3640208	0.523131
Chr1	33020001	33040000	0.4309		Chr18	19600001	19800000	1e-05		Chr4	17200001	17400001	0.003095		Chr2	3655372	3657530	0.451132
Chr1	33040001	33060000	0.4303		Chr18	19800001	20000000	2.5e-05		Chr4	17400001	17600001	0.00348		Chr2	3738774	3741954	0.538331
Chr1	33060001	33080000	0.4301		Chr18	20000001	20200000	1.5e-05		Chr4	17600001	17800001	0.00318		Chr2	3812014	3818252	0.116673
Chr1	33080001	33100000	0.4325		Chr18	20200001	20400000	1.5e-05		Chr4	17800001	18000001	0.00326		Chr2	3900358	3904500	0.0173112
Chr1	33100001	33120000	0.4292		Chr18	20400001	20600000	2e-05		Chr4	18000001	18200001	0.003375		Chr2	4020857	4025305	0.357402
Chr1	33120001	33140000	0.4268		Chr18	20600001	20800000	1e-05		Chr4	18200001	18400001	0.00339		Chr2	4099304	4117154	0.0796338
Chr1	33140001	33160000	0.426		Chr19	1	200000	1.5e-05		Chr4	18400001	18600001	0.003245		Chr2	4119357	4131025	0.980589
Chr1	33160001	33180000	0.43		Chr19	200001	400000	2.5e-05		Chr4	18600001	18800001	0.003525		Chr2	4133379	4134188	0.291832
Chr1	33180001	33200000	0.43		Chr19	400001	600000	2e-05		Chr4	18800001	19000001	0.003185		Chr2	4134296	4137972	0.415251
Chr1	33200001	33220000	0.4322		Chr19	600001	800000	5e-06		Chr4	19000001	19200001	0.003085		Chr2	4138054	4146752	0.980103
Chr1	33220001	33240000	0.4342		Chr19	800001	1000000	1.5e-05		Chr4	19200001	19400001	0.00325		Chr2	4148680	4181157	0.625996
Chr1	33240001	33260000	0.4345		Chr19	1000001	1200000	3.5e-05		Chr4	19400001	19600001	0.003265		Chr2	4181330	4185484	0.403437
Chr1	33260001	33280000	0.4335		Chr19	1200001	1400000	2e-05		Chr4	19600001	19800001	0.002785		Chr2	4191863	4247228	0.00577559
Chr1	33280001	33300000	0.4332		Chr19	1400001	1600000	3e-05		Chr4	19800001	20000001	0.003115		Chr2	4282856	4291556	0.104557
Chr1	33300001	33320000	0.4378		Chr19	1600001	1800000	3.5e-05		Chr4	20000001	20200001	0.00293		Chr2	4293750	4299687	0.891195
Chr1	33320001	33340000	0.4425		Chr19	1800001	2000000	2.5e-05		Chr4	20200001	20400001	0.00294		Chr2	4299691	4305975	0.312595
Chr1	33340001	33360000	0.4435		Chr19	2000001	2200000	1.5e-05		Chr4	20400001	20600001	0.003445		Chr2	4305295	4309270	0.291697
Chr1	33360001	33380000	0.4427		Chr19	2200001	2400000	4.5e-05		Chr4	20600001	20800001	0.00314		Chr2	4310761	4318452	0.897773
Chr1	33380001	33400000	0.4471		Chr19	2400001	2600000	2.5e-05		Chr4	20800001	21000001	0.003355		Chr2	4325214	4343482	0.652563
Chr1	33400001	33420000	0.4468		Chr19	2600001	2800000	4e-05		Chr4	21000001	21200001	0.002845		Chr2	4343728	4347958	0.561437
Chr1	33420001	33440000	0.4498		Chr19	2800001	3000000	3.5e-05		Chr4	21200001	21400001	0.00268		Chr2	4347941	4353247	0.552802
Chr1	33440001	33460000	0.4518		Chr19	3000001	3200000	2.5e-05		Chr4	21400001	21418693	0.00036		Chr2	4354479	4356558	0.242945
Chr1	33460001	33480000	0.4523		Chr19	3200001	3400000	2e-05		Chr5	1	200001	0.00292		Chr2	4356621	4410953	0.0415215
Chr1	33480001	33500000	0.452		Chr19	3400001	3600000	2e-05		Chr5	200001	400001	0.002945		Chr2	4421331	4438533	0.767191
Chr1	33500001	33520000	0.4518		Chr19	3600001	3800000	1e-05		Chr5	400001	600001	0.002895		Chr2	4439065	4445061	0.0812077
Chr1	33520001	33540000	0.4493		Chr19	3800001	4000000	6e-05		Chr5	600001	800001	0.003385		Chr2	4443621	4447677	0.140284
Chr1	33540001	33560000	0.448		Chr19	4000001	4200000	5e-05		Chr5	800001	1000001	0.00282		Chr2	4448273	4456076	0.578151
Chr1	33560001	33580000	0.4486		Chr19	4200001	4400000	0		Chr5	1000001	1200001	0.002805		Chr2	4456585	4460511	0.0996626
Chr1	33580001	33600000	0.4465		Chr19	4400001	4600000	5e-05		Chr5	1200001	1400001	0.002985		Chr2	4460672	4471105	0.743359
Chr1	33600001	33620000	0.4477		Chr19	4600001	4800000	2e-05		Chr5	1400001	1600001	0.002915		Chr2	4471576	4489193	0.252746
Chr1	33620001	33640000	0.4458		Chr19	4800001	5000000	1e-05		Chr5	1600001	1800001	0.002755		Chr2	4487937	4495740	0.724949
Chr1	33640001	33660000	0.4429		Chr19	5000001	5200000	5e-06		Chr5	1800001	2000001	0.00237		Chr2	4497592	4499132	0.421659
Chr1	33660001	33680000	0.4426		Chr19	5200001	5400000	0		Chr5	2000001	2200001	0.003255		Chr2	4500523	4509896	0.725835
Chr1	33680001	33700000	0.4434		Chr19	5400001	5600000	1.5e-05		Chr5	2200001	2400001	0.00319		Chr2	4511900	4519692	0.412695
Chr1	33700001	33720000	0.4412		Chr19	5600001	5800000	6.5e-05		Chr5	2400001	2600001	0.002845		Chr2	4526966	4532239	0.800032
Chr1	33720001	33740000	0.4439		Chr19	5800001	6000000	2.5e-05		Chr5	2600001	2800001	0.00296		Chr2	4533485	4547909	0.470796
Chr1	33740001	33760000	0.4476		Chr19	6000001	6200000	6.5e-05		Chr5	2800001	3000001	0.00317		Chr2	4552215	4558206	0.570958
Chr1	33760001	33780000	0.4458		Chr19	6200001	6400000	7.5e-05		Chr5	3000001	3200001	0.00295		Chr2	4558969	4565812	0.193547
Chr1	33780001	33800000	0.4459		Chr19	6400001	6600000	1e-05		Chr5	3200001	3400001	0.00288		Chr2	4564577	4569662	0.79621
Chr1	33800001	33820000	0.444		Chr19	6600001	6800000	1.5e-05		Chr5	3400001	3600001	0.00292		Chr2	4570311	4586699	0.087438
Chr1	33820001	33840000	0.4466		Chr19	6800001	7000000	5e-05		Chr5	3600001	3800001	0.002725		Chr2	4588585	4602187	0.966121
Chr1	33840001	33860000	0.4477		Chr19	7000001	7200000	2e-05		Chr5	3800001	4000001	0.00118		Chr2	4602677	4604869	0.536934
Chr1	33860001	33880000	0.4511		Chr19	7200001	7400000	2.5e-05		Chr5	4000001	4200001	0.001305		Chr2	4605196	4610018	0.410961
Chr1	33880001	33900000	0.4511		Chr19	7400001	7600000	3e-05		Chr5	4200001	4400001	0.00137		Chr2	4610927	4613900	0.0229198
Chr1	33900001	33920000	0.4523		Chr19	7600001	7800000	3e-05		Chr5	4400001	4600001	0.001575		Chr2	4614298	4619381	0.129602
Chr1	33920001	33940000	0.4522		Chr19	7800001	8000000	6e-05		Chr5	4600001	4800001	0.0014		Chr2	4619873	4624811	0.528762
Chr1	33940001	33960000	0.45		Chr19	8000001	8200000	1.5e-05		Chr5	4800001	5000001	0.001325		Chr2	4627563	4668006	0.571688
Chr1	33960001	33980000	0.4555		Chr19	8200001	8400000	2e-05		Chr5	5000001	5200001	0.001715		Chr2	4660420	4668006	0.752332
Chr1	33980001	34000000	0.455		Chr19	8400001	8600000	0		Chr5	5200001	5400001	0.001545		Chr2	4673138	4677110	0.599906
Chr1	34000001	34020000	0.4579		Chr19	8600001	8800000	8.5e-05		Chr5	5400001	5600001	0.001725		Chr2	4675932	4680951	0.0277533
Chr1	34020001	34040000	0.4528		Chr19	8800001	9000000	3e-05		Chr5	5600001	5800001	0.001625		Chr2	4681085	4688676	0.588153
Chr1	34040001	34060000	0.456		Chr19	9000001	9200000	4e-05		Chr5	5800001	6000001	0.00164		Chr2	4688685	4689933	0.0525087
Chr1	34060001	34080000	0.4558		Chr19	9200001	9400000	5e-05		Chr5	6000001	6200001	0.00183		Chr2	4727574	4737296	0.537176
Chr1	34080001	34100000	0.459		Chr19	9400001	9600000	1e-05		Chr5	6200001	6400001	0.001925		Chr2	4737324	4742186	0.158666
Chr1	34100001	34120000	0.4628		Chr19	9600001	9800000	1.5e-05		Chr5	6400001	6600001	0.00204		Chr2	4743112	4753906	0.187911
Chr1	34120001	34140000	0.4617		Chr19	9800001	10000000	4e-05		Chr5	6600001	6800001	0.00168		Chr2	4752257	4755711	0.977464
Chr1	34140001	34160000	0.4615		Chr19	10000001	10200000	3.5e-05		Chr5	6800001	7000001	0.00194		Chr2	4758993	4767942	0.566987
Chr1	34160001	34180000	0.4615		Chr19	10200001	10400000	5e-06		Chr5	7000001	7200001	0.00195		Chr2	4768047	4774183	0.620058
Chr1	34180001	34200000	0.4625		Chr19	10400001	10600000	2e-05		Chr5	7200001	7400001	0.002255		Chr2	4777364	4797344	0.149659
Chr1	34200001	34220000	0.4637		Chr19	10600001	10800000	4e-05		Chr5	7400001	7600001	0.001915		Chr2	4798154	4801668	0.904312
Chr1	34220001	34240000	0.4663		Chr19	10800001	11000000	8e-05		Chr5	7600001	7800001	0.00183		Chr2	4802138	4806328	0.308193
Chr1	34240001	34260000	0.4635		Chr19	11000001	11200000	0.00011		Chr5	7800001	8000001	0.00183		Chr2	4804241	4817247	0.311119
Chr1	34260001	34280000	0.4619		Chr19	11200001	11400000	5e-05		Chr5	8000001	8200001	0.001675		Chr2	4814309	4823750	0.059637
Chr1	34280001	34300000	0.4621		Chr19	11400001	11600000	7e-05		Chr5	8200001	8400001	0.001565		Chr2	4823834	4831622	0.470255
Chr1	34300001	34320000	0.4594		Chr19	11600001	11800000	4e-05		Chr5	8400001	8600001	0.00243		Chr2	4832158	4834707	0.699963
Chr1	34320001	34340000	0.4618		Chr19	11800001	12000000	3e-05		Chr5	8600001	8800001	0.002035		Chr2	4835075	4881000	0.43491
Chr1	34340001	34360000	0.4614		Chr19	12000001	12200000	5e-05		Chr5	8800001	9000001	0.002325		Chr2	4919456	4924896	0.189069
Chr1	34360001	34380000	0.4586		Chr19	12200001	12400000	3.5e-05		Chr5	9000001	9200001	0.001695		Chr2	4921143	4926555	0.886409
Chr1	34380001	34400000	0.4592		Chr19	12400001	12600000	3e-05		Chr5	9200001	9400001	0.00183		Chr2	4928293	4931378	0.884138
Chr1	34400001	34420000	0.4612		Chr19	12600001	12800000	1e-05		Chr5	9400001	9600001	0.001965		Chr2	4934440	4937451	0.148266
Chr1	34420001	34440000	0.4637		Chr19	12800001	13000000	2.5e-05		Chr5	9600001	9800001	0.002405		Chr2	4938250	4941462	0.795306
Chr1	34440001	34460000	0.4647		Chr19	13000001	13200000	3e-05		Chr5	9800001	10000001	0.001745		Chr2	4941899	4949571	0.74872
Chr1	34460001	34480000	0.4688		Chr19	13200001	13400000	5e-06		Chr5	10000001	10200001	0.00194		Chr2	4951037	4967167	0.29429
Chr1	34480001	34500000	0.4688		Chr19	13400001	13600000	1.5e-05		Chr5	10200001	10400001	0.001915		Chr2	4971909	4979918	0.619685
Chr1	34500001	34520000	0.4685		Chr19	13600001	13800000	5.5e-05		Chr5	10400001	10600001	0.001715		Chr2	4980488	4982307	0.443566
Chr1	34520001	34540000	0.4636		Chr19	13800001	14000000	5e-05		Chr5	10600001	10800001	0.00192		Chr2	4990047	4990683	0.00400215
Chr1	34540001	34560000	0.4651		Chr19	14000001	14200000	4.5e-05		Chr5	10800001	11000001	0.00163		Chr2	4993026	5001095	0.36981
Chr1	34560001	34580000	0.4674		Chr19	14200001	14400000	2.5e-05		Chr5	11000001	11200001	0.001945		Chr2	5004310	5006136	0.648218
Chr1	34580001	34600000	0.4664		Chr19	14400001	14600000	4e-05		Chr5	11200001	11400001	0.00204		Chr2	5007655	5012828	0.304649
Chr1	34600001	34620000	0.4629		Chr19	14600001	14800000	3.5e-05		Chr5	11400001	11600001	0.00196		Chr2	5016427	5020545	0.0836971
Chr1	34620001	34640000	0.4625		Chr19	14800001	15000000	4.5e-05		Chr5	11600001	11800001	0.002255		Chr2	5021007	5028899	0.95833
Chr1	34640001	34660000	0.4623		Chr19	15000001	15200000	6.5e-05		Chr5	11800001	12000001	0.001925		Chr2	5030548	5032133	0.970647
Chr1	34660001	34680000	0.4597		Chr19	15200001	15400000	2e-05		Chr5	12000001	12200001	0.00246		Chr2	5033866	5034720	0.0744096
Chr1	34680001	34700000	0.4598		Chr19	15400001	15600000	7e-05		Chr5	12200001	12400001	0.00211		Chr2	5039830	5073653	0.0328222
Chr1	34700001	34720000	0.4603		Chr19	15600001	15800000	3.5e-05		Chr5	12400001	12600001	0.002335		Chr2	5079013	5080663	0.385673
Chr1	34720001	34740000	0.4661		Chr19	15800001	16000000	8e-05		Chr5	12600001	12800001	0.0019		Chr2	5084323	5115900	0.19593
Chr1	34740001	34760000	0.4668		Chr19	16000001	16200000	3e-05		Chr5	12800001	13000001	0.002305		Chr2	5125008	5146494	0.798482
Chr1	34760001	34780000	0.4639		Chr19	16200001	16400000	1e-05		Chr5	13000001	13200001	0.0022		Chr2	5146526	5154286	0.985159
Chr1	34780001	34800000	0.468		Chr19	16400001	16600000	7e-05		Chr5	13200001	13400001	0.002535		Chr2	5154726	5160528	0.852032
Chr1	34800001	34820000	0.4683		Chr19	16600001	16800000	1.5e-05		Chr5	13400001	13600001	0.002425		Chr2	5160951	5169641	0.856404
Chr1	34820001	34840000	0.4679		Chr19	16800001	17000000	4e-05		Chr5	13600001	13800001	0.002495		Chr2	5171439	5202539	0.0184243
Chr1	34840001	34860000	0.4733		Chr19	17000001	17200000	1.5e-05		Chr5	13800001	14000001	0.002655		Chr2	5221602	5231162	0.0285134
Chr1	34860001	34880000	0.4774		Chr19	17200001	17400000	5.5e-05		Chr5	14000001	14200001	0.00308		Chr2	5232806	5240151	0.697045
Chr1	34880001	34900000	0.4801		Chr19	17400001	17600000	3.5e-05		Chr5	14200001	14400001	0.002325		Chr2	5240187	5256417	0.944376
Chr1	34900001	34920000	0.4795		Chr19	17600001	17800000	5.5e-05		Chr5	14400001	14600001	0.00216		Chr2	5256612	5259132	0.53554
Chr1	34920001	34940000	0.483		Chr19	17800001	18000000	5e-06		Chr5	14600001	14800001	0.00281		Chr2	5260048	5266676	0.386996
Chr1	34940001	34960000	0.4827		Chr19	18000001	18200000	5e-05		Chr5	14800001	15000001	0.001975		Chr2	5267162	5271057	0.506452
Chr1	34960001	34980000	0.4829		Chr19	18200001	18400000	4e-05		Chr5	15000001	15200001	0.0023		Chr2	5271695	5273351	0.462274
Chr1	34980001	35000000	0.482		Chr19	18400001	18600000	4.5e-05		Chr5	15200001	15400001	0.00257		Chr2	5273863	5279009	0.0944122
Chr1	35000001	35020000	0.4859		Chr19	18600001	18800000	0.000105		Chr5	15400001	15600001	0.00299		Chr2	5278097	5288490	0.88213
Chr1	35020001	35040000	0.4862		Chr19	18800001	19000000	0.000105		Chr5	15600001	15800001	0.00303		Chr2	5288468	5294137	0.809158
Chr1	35040001	35060000	0.4843		Chr19	19000001	19200000	5.5e-05		Chr5	15800001	16000001	0.002805		Chr2	5293317	5297766	0.518739
Chr1	35060001	35080000	0.4811		Chr19	19200001	19400000	4e-05		Chr5	16000001	16200001	0.00226		Chr2	5298988	5303884	0.204752
Chr1	35080001	35100000	0.4799		Chr19	19400001	19600000	5.5e-05		Chr5	16200001	16400001	0.00306		Chr2	5306610	5316064	0.550089
Chr1	35100001	35120000	0.4859		Chr19	19600001	19800000	8.5e-05		Chr5	16400001	16600001	0.002915		Chr2	5328514	5349090	0.460651
Chr1	35120001	35140000	0.4833		Chr19	19800001	20000000	4.5e-05		Chr5	16600001	16800001	0.00252		Chr2	5350539	5355462	0.412222
Chr1	35140001	35160000	0.4826		Chr19	20000001	20200000	6.5e-05		Chr5	16800001	17000001	0.002305		Chr2	5357207	5364341	0.608494
Chr1	35160001	35180000	0.4884		Chr19	20200001	20400000	5.5e-05		Chr5	17000001	17200001	0.0025		Chr2	5364533	5375795	0.129664
Chr1	35180001	35200000	0.489		Chr19	20400001	20600000	7e-05		Chr5	17200001	17400001	0.0025		Chr2	5374776	5378858	0.719142
Chr1	35200001	35220000	0.4899		Chr20	1	200000	6e-05		Chr5	17400001	17600001	0.00243		Chr2	5379659	5388348	0.433442
Chr1	35220001	35240000	0.4913		Chr20	200001	400000	2.5e-05		Chr5	17600001	17800001	0.002655		Chr2	5389031	5390942	0.796613
Chr1	35240001	35260000	0.4919		Chr20	400001	600000	0.000105		Chr5	17800001	18000001	0.00261		Chr2	5392127	5401178	0.119916
Chr1	35260001	35280000	0.4913		Chr20	600001	800000	0.000105		Chr5	18000001	18200001	0.00269		Chr2	5402081	5409440	0.670457
Chr1	35280001	35300000	0.4915		Chr20	800001	1000000	3.5e-05		Chr5	18200001	18400001	0.00298		Chr2	5409941	5414406	0.300573
Chr1	35300001	35320000	0.4886		Chr20	1000001	1200000	4e-05		Chr5	18400001	18600001	0.003315		Chr2	5419364	5655238	0.622033
Chr1	35320001	35340000	0.4912		Chr20	1200001	1400000	4e-05		Chr5	18600001	18800001	0.00375		Chr2	5685958	5690551	0.0707427
Chr1	35340001	35360000	0.4941		Chr20	1400001	1600000	1.5e-05		Chr5	18800001	19000001	0.00343		Chr2	5736495	5751615	0.149411
Chr1	35360001	35380000	0.4963		Chr20	1600001	1800000	0.000125		Chr5	19000001	19200001	0.00371		Chr2	5751664	5756319	0.83642
Chr1	35380001	35400000	0.4994		Chr20	1800001	2000000	4.5e-05		Chr5	19200001	19400001	0.003985		Chr2	5757673	5759185	0.627085
Chr1	35400001	35420000	0.5025		Chr20	2000001	2200000	7e-05		Chr5	19400001	19600001	0.00322		Chr2	5759246	5761697	0.0328984
Chr1	35420001	35440000	0.5112		Chr20	2200001	2400000	1.5e-05		Chr5	19600001	19800001	0.002955		Chr2	5762424	5764419	0.424521
Chr1	35440001	35460000	0.5155		Chr20	2400001	2600000	1.5e-05		Chr5	19800001	19988562	0.002625		Chr2	5765420	5775407	0.0812342
Chr1	35460001	35480000	0.5209		Chr20	2600001	2800000	8e-05		Chr6	1	200001	0.002195		Chr2	5776599	5778880	0.383771
Chr1	35480001	35500000	0.528		Chr20	2800001	3000000	7e-05		Chr6	200001	400001	0.00225		Chr2	5779004	5782417	0.196367
Chr1	35500001	35520000	0.5341		Chr20	3000001	3200000	7e-05		Chr6	400001	600001	0.00205		Chr2	5782799	5806250	0.502244
Chr1	35520001	35540000	0.5374		Chr20	3200001	3400000	6.5e-05		Chr6	600001	800001	0.00192		Chr2	5807626	5812138	0.178866
Chr1	35540001	35560000	0.5426		Chr20	3400001	3600000	0.000105		Chr6	800001	1000001	0.00269		Chr2	5813322	5819078	0.0137339
Chr1	35560001	35580000	0.5393		Chr20	3600001	3800000	3.5e-05		Chr6	1000001	1200001	0.001825		Chr2	5820080	5845564	0.021645
Chr1	35580001	35600000	0.5388		Chr20	3800001	4000000	4.5e-05		Chr6	1200001	1400001	0.0021		Chr2	5846849	5849064	0.610285
Chr1	35600001	35620000	0.5432		Chr20	4000001	4200000	3.5e-05		Chr6	1400001	1600001	0.00229		Chr2	5850201	5862851	0.739514
Chr1	35620001	35640000	0.5384		Chr20	4200001	4400000	4.5e-05		Chr6	1600001	1800001	0.002695		Chr2	5863942	5868432	0.0372163
Chr1	35640001	35660000	0.5418		Chr20	4400001	4600000	4.5e-05		Chr6	1800001	2000001	0.002455		Chr2	5865766	5868810	0.361731
Chr1	35660001	35680000	0.5489		Chr20	4600001	4800000	0.0001		Chr6	2000001	2200001	0.002275		Chr2	5870085	5871199	0.873587
Chr1	35680001	35700000	0.5489		Chr20	4800001	5000000	7e-05		Chr6	2200001	2400001	0.00282		Chr2	5874127	5876016	0.176436
Chr1	35700001	35720000	0.5491		Chr20	5000001	5200000	5e-05		Chr6	2400001	2600001	0.00275		Chr2	5876913	5878595	0.489354
Chr1	35720001	35740000	0.5438		Chr20	5200001	5400000	6.5e-05		Chr6	2600001	2800001	0.00297		Chr2	5879044	5882320	0.390997
Chr1	35740001	35760000	0.533		Chr20	5400001	5600000	3e-05		Chr6	2800001	3000001	0.003035		Chr2	5883494	5886315	0.754622
Chr1	35760001	35780000	0.5247		Chr20	5600001	5800000	5.5e-05		Chr6	3000001	3200001	0.00242		Chr2	5887256	5890454	0.577491
Chr1	35780001	35800000	0.5172		Chr20	5800001	6000000	4e-05		Chr6	3200001	3400001	0.002825		Chr2	5891247	5892115	0.711302
Chr1	35800001	35820000	0.5099		Chr20	6000001	6200000	6e-05		Chr6	3400001	3600001	0.00306		Chr2	5892989	5897760	0.898038
Chr1	35820001	35840000	0.5077		Chr20	6200001	6400000	1e-05		Chr6	3600001	3800001	0.00327		Chr2	5899312	5904753	0.000637424
Chr1	35840001	35860000	0.4979		Chr20	6400001	6600000	6e-05		Chr6	3800001	4000001	0.002665		Chr2	5905820	5911911	0.401488
Chr1	35860001	35880000	0.4818		Chr20	6600001	6800000	5e-05		Chr6	4000001	4200001	0.00298		Chr2	5915178	5943631	0.397551
Chr1	35880001	35900000	0.4643		Chr20	6800001	7000000	5e-05		Chr6	4200001	4400001	0.002185		Chr2	5957778	5963030	0.22859
Chr1	35900001	35920000	0.4419		Chr20	7000001	7200000	5e-06		Chr6	4400001	4600001	0.00243		Chr2	5963567	5964831	0.450478
Chr1	35920001	35940000	0.4242		Chr20	7200001	7400000	7e-05		Chr6	4600001	4800001	0.00248		Chr2	5996420	6040434	0.54414
Chr1	35940001	35960000	0.4187		Chr20	7400001	7600000	3e-05		Chr6	4800001	5000001	0.002435		Chr2	6043117	6044881	0.318411
Chr1	35960001	35976506	0.4222		Chr20	7600001	7800000	9.5e-05		Chr6	5000001	5200001	0.00239		Chr2	6045831	6054133	0.519701
Chr18	1	20000	0.4314		Chr20	7800001	8000000	7e-05		Chr6	5200001	5400001	0.00218		Chr2	6053930	6060190	0.292671
Chr18	20001	40000	0.4343		Chr20	8000001	8200000	9.5e-05		Chr6	5400001	5600001	0.00205		Chr2	6064274	6076324	0.850527
Chr18	40001	60000	0.4352		Chr20	8200001	8400000	5e-05		Chr6	5600001	5800001	0.00221		Chr2	6076358	6087671	0.0225409
Chr18	60001	80000	0.4325		Chr20	8400001	8600000	1.5e-05		Chr6	5800001	6000001	0.00228		Chr2	6115474	6146650	0.547746
Chr18	80001	100000	0.4305		Chr20	8600001	8800000	8e-05		Chr6	6000001	6200001	0.00219		Chr2	6238979	6253586	0.201557
Chr18	100001	120000	0.4282		Chr20	8800001	9000000	4.5e-05		Chr6	6200001	6400001	0.00214		Chr2	6298142	6305526	0.42156
Chr18	120001	140000	0.4256		Chr20	9000001	9200000	2.5e-05		Chr6	6400001	6600001	0.001915		Chr2	6305964	6311332	0.274675
Chr18	140001	160000	0.424		Chr20	9200001	9400000	4e-05		Chr6	6600001	6800001	0.002185		Chr2	6311436	6315308	0.569322
Chr18	160001	180000	0.4235		Chr20	9400001	9600000	5e-05		Chr6	6800001	7000001	0.002025		Chr2	6316463	6318082	0.715364
Chr18	180001	200000	0.4233		Chr20	9600001	9800000	2e-05		Chr6	7000001	7200001	0.00235		Chr2	6320269	6323277	0.683374
Chr18	200001	220000	0.4228		Chr20	9800001	10000000	2.5e-05		Chr6	7200001	7400001	0.00225		Chr2	6323405	6327845	0.73895
Chr18	220001	240000	0.4208		Chr20	10000001	10200000	4.5e-05		Chr6	7400001	7600001	0.002425		Chr2	6341646	6371954	0.719323
Chr18	240001	260000	0.4192		Chr20	10200001	10400000	3e-05		Chr6	7600001	7800001	0.0021		Chr2	6379182	6403437	0.876063
Chr18	260001	280000	0.4209		Chr20	10400001	10600000	5.5e-05		Chr6	7800001	8000001	0.00224		Chr2	6417497	6420476	0.993718
Chr18	280001	300000	0.4208		Chr20	10600001	10800000	6.5e-05		Chr6	8000001	8200001	0.002405		Chr2	6438065	6479362	0.745905
Chr18	300001	320000	0.4225		Chr20	10800001	11000000	2e-05		Chr6	8200001	8400001	0.00221		Chr2	6481017	6486860	0.997236
Chr18	320001	340000	0.422		Chr20	11000001	11200000	1e-05		Chr6	8400001	8600001	0.001975		Chr2	6488561	6496207	0.627353
Chr18	340001	360000	0.4234		Chr20	11200001	11400000	6.5e-05		Chr6	8600001	8800001	0.00185		Chr2	6496147	6503223	0.288815
Chr18	360001	380000	0.4249		Chr20	11400001	11600000	2.5e-05		Chr6	8800001	9000001	0.0023		Chr2	6505994	6514498	0.188816
Chr18	380001	400000	0.4251		Chr20	11600001	11800000	2e-05		Chr6	9000001	9200001	0.002185		Chr2	6515390	6519088	0.500485
Chr18	400001	420000	0.422		Chr20	11800001	12000000	3.5e-05		Chr6	9200001	9400001	0.00251		Chr2	6521956	6533872	0.33787
Chr18	420001	440000	0.42		Chr20	12000001	12200000	5e-05		Chr6	9400001	9600001	0.00173		Chr2	6538195	6564172	0.0730635
Chr18	440001	460000	0.4207		Chr20	12200001	12400000	3.5e-05		Chr6	9600001	9800001	0.00227		Chr2	6564895	6567462	0.0380724
Chr18	460001	480000	0.419		Chr20	12400001	12600000	1e-05		Chr6	9800001	10000001	0.002255		Chr2	6568090	6568664	0.00216939
Chr18	480001	500000	0.4206		Chr20	12600001	12800000	2e-05		Chr6	10000001	10200001	0.002525		Chr2	6573999	6584447	0.24341
Chr18	500001	520000	0.4199		Chr20	12800001	13000000	5.5e-05		Chr6	10200001	10400001	0.002445		Chr2	6585471	6599356	0.0681108
Chr18	520001	540000	0.4219		Chr20	13000001	13200000	1e-05		Chr6	10400001	10600001	0.0021		Chr2	6600771	6601206	0.190735
Chr18	540001	560000	0.422		Chr20	13200001	13400000	2e-05		Chr6	10600001	10800001	0.001875		Chr2	6601420	6604088	0.533947
Chr18	560001	580000	0.422		Chr20	13400001	13600000	2e-05		Chr6	10800001	11000001	0.00334		Chr2	6608637	6620921	0.616545
Chr18	580001	600000	0.4255		Chr20	13600001	13800000	1.5e-05		Chr6	11000001	11200001	0.003945		Chr2	6622302	6624760	0.797857
Chr18	600001	620000	0.4266		Chr20	13800001	14000000	2e-05		Chr6	11200001	11400001	0.003355		Chr2	6626125	6633401	0.524622
Chr18	620001	640000	0.4278		Chr20	14000001	14200000	5.5e-05		Chr6	11400001	11600001	0.003525		Chr2	6634282	6635821	0.869659
Chr18	640001	660000	0.4254		Chr20	14200001	14400000	1e-05		Chr6	11600001	11800001	0.00319		Chr2	6636639	6642363	0.00369713
Chr18	660001	680000	0.4235		Chr20	14400001	14600000	5e-05		Chr6	11800001	12000001	0.003295		Chr2	6643051	6655483	0.00606843
Chr18	680001	700000	0.4212		Chr20	14600001	14800000	2e-05		Chr6	12000001	12200001	0.003255		Chr2	6656656	6667973	0.238331
Chr18	700001	720000	0.4204		Chr20	14800001	15000000	2e-05		Chr6	12200001	12400001	0.002965		Chr2	6666811	6675656	0.399386
Chr18	720001	740000	0.4202		Chr20	15000001	15200000	2.5e-05		Chr6	12400001	12600001	0.002755		Chr2	6678489	6699179	0.526578
Chr18	740001	760000	0.4187		Chr20	15200001	15400000	3.5e-05		Chr6	12600001	12800001	0.003175		Chr2	6729749	6733708	0.959193
Chr18	760001	780000	0.4173		Chr20	15400001	15600000	6e-05		Chr6	12800001	13000001	0.00274		Chr2	6737879	6769459	0.85697
Chr18	780001	800000	0.416		Chr20	15600001	15800000	5.5e-05		Chr6	13000001	13200001	0.001055		Chr2	6769498	6773221	0.306557
Chr18	800001	820000	0.416		Chr20	15800001	16000000	7e-05		Chr6	13200001	13400001	0.00186		Chr2	6773921	6776059	0.817832
Chr18	820001	840000	0.4148		Chr20	16000001	16200000	2.5e-05		Chr6	13400001	13600001	0.00199		Chr2	6778422	6783763	0.21864
Chr18	840001	860000	0.4164		Chr20	16200001	16400000	5.5e-05		Chr6	13600001	13800001	0.00212		Chr2	6783881	6789334	0.00472951
Chr18	860001	880000	0.4215		Chr20	16400001	16600000	1e-05		Chr6	13800001	14000001	0.001845		Chr2	6790549	6798747	0.961916
Chr18	880001	900000	0.4221		Chr20	16600001	16800000	5e-06		Chr6	14000001	14200001	0.002005		Chr2	6801765	6812345	0.0140584
Chr18	900001	920000	0.4256		Chr20	16800001	17000000	1e-05		Chr6	14200001	14400001	0.002095		Chr2	6813521	6841363	0.50142
Chr18	920001	940000	0.4245		Chr20	17000001	17200000	2e-05		Chr6	14400001	14600001	0.001875		Chr2	6874528	6897268	0.334928
Chr18	940001	960000	0.4243		Chr20	17200001	17400000	1.5e-05		Chr6	14600001	14800001	0.00207		Chr2	6901735	6905240	0.107396
Chr18	960001	980000	0.4275		Chr20	17400001	17600000	3e-05		Chr6	14800001	15000001	0.00201		Chr2	6906419	6941028	0.183606
Chr18	980001	1000000	0.4241		Chr20	17600001	17800000	2e-05		Chr6	15000001	15200001	0.0019		Chr2	6960106	6990087	0.0556276
Chr18	1000001	1020000	0.4213		Chr20	17800001	18000000	1e-05		Chr6	15200001	15400001	0.00153		Chr2	6991365	6995756	0.753262
Chr18	1020001	1040000	0.4202		Chr20	18000001	18200000	2e-05		Chr6	15400001	15600001	0.001865		Chr2	7000642	7005011	0.00194004
Chr18	1040001	1060000	0.4183		Chr20	18200001	18400000	1.5e-05		Chr6	15600001	15800001	0.00197		Chr2	7003845	7014867	0.871029
Chr18	1060001	1080000	0.4159		Chr20	18400001	18600000	1.5e-05		Chr6	15800001	16000001	0.00207		Chr2	7014993	7020964	0.237456
Chr18	1080001	1100000	0.4184		Chr20	18600001	18800000	5e-06		Chr6	16000001	16200001	0.002035		Chr2	7021611	7032267	0.843172
Chr18	1100001	1120000	0.4159		Chr20	18800001	19000000	5e-06		Chr6	16200001	16400001	0.00215		Chr2	7032398	7038298	0.801609
Chr18	1120001	1140000	0.4159		Chr20	19000001	19200000	5e-06		Chr6	16400001	16600001	0.002065		Chr2	7040910	7048720	0.729121
Chr18	1140001	1160000	0.4179		Chr21	1	200000	2e-05		Chr6	16600001	16800001	0.002025		Chr2	7049571	7051767	0.0917862
Chr18	1160001	1180000	0.416		Chr21	200001	400000	1.5e-05		Chr6	16800001	17000001	0.002115		Chr2	7058618	7061628	0.321092
Chr18	1180001	1200000	0.4178		Chr21	400001	600000	4e-05		Chr6	17000001	17200001	0.002055		Chr2	7062380	7066586	0.0226266
Chr18	1200001	1220000	0.4202		Chr21	600001	800000	2.5e-05		Chr6	17200001	17400001	0.001945		Chr2	7067078	7069397	0.205193
Chr18	1220001	1240000	0.4215		Chr21	800001	1000000	2e-05		Chr6	17400001	17600001	0.001895		Chr2	7070320	7074016	0.0212032
Chr18	1240001	1260000	0.4231		Chr21	1000001	1200000	2.5e-05		Chr6	17600001	17800001	0.001875		Chr2	7074431	7076277	0.447701
Chr18	1260001	1280000	0.4236		Chr21	1200001	1400000	3e-05		Chr6	17800001	18000001	0.001895		Chr2	7079625	7086457	0.201308
Chr18	1280001	1300000	0.4224		Chr21	1400001	1600000	1.5e-05		Chr6	18000001	18200001	0.00193		Chr2	7086614	7089872	0.862808
Chr18	1300001	1320000	0.4207		Chr21	1600001	1800000	2.5e-05		Chr6	18200001	18400001	0.002415		Chr2	7091894	7100408	0.282461
Chr18	1320001	1340000	0.4205		Chr21	1800001	2000000	0.000105		Chr6	18400001	18600001	0.00204		Chr2	7107434	7109208	0.0346668
Chr18	1340001	1360000	0.419		Chr21	2000001	2200000	8.5e-05		Chr6	18600001	18800001	0.00282		Chr2	7110405	7111480	0.539495
Chr18	1360001	1380000	0.4193		Chr21	2200001	2400000	7.5e-05		Chr6	18800001	19000001	0.002305		Chr2	7113406	7121394	0.691822
Chr18	1380001	1400000	0.4197		Chr21	2400001	2600000	6.5e-05		Chr6	19000001	19200001	0.00271		Chr2	7123076	7130873	0.56913
Chr18	1400001	1420000	0.4201		Chr21	2600001	2800000	3e-05		Chr6	19200001	19400001	0.002475		Chr2	7131706	7137441	0.117705
Chr18	1420001	1440000	0.4175		Chr21	2800001	3000000	3e-05		Chr6	19400001	19600001	0.002635		Chr2	7138630	7142283	0.762766
Chr18	1440001	1460000	0.4183		Chr21	3000001	3200000	2e-05		Chr6	19600001	19800001	0.00238		Chr2	7142079	7149089	0.576442
Chr18	1460001	1480000	0.4176		Chr21	3200001	3400000	2.5e-05		Chr6	19800001	20000001	0.001785		Chr2	7150662	7156465	0.846002
Chr18	1480001	1500000	0.4166		Chr21	3400001	3600000	2.5e-05		Chr6	20000001	20200001	0.002225		Chr2	7156967	7178194	0.763165
Chr18	1500001	1520000	0.4148		Chr21	3600001	3800000	5e-05		Chr6	20200001	20400001	0.00226		Chr2	7179754	7194800	0.11926
Chr18	1520001	1540000	0.4149		Chr21	3800001	4000000	5e-05		Chr6	20400001	20600001	0.00262		Chr2	7225204	7249097	0.445141
Chr18	1540001	1560000	0.4144		Chr21	4000001	4200000	7e-05		Chr6	20600001	20800001	0.00312		Chr2	7249497	7265915	0.418481
Chr18	1560001	1580000	0.4146		Chr21	4200001	4400000	8e-05		Chr6	20800001	21000001	0.002785		Chr2	7272880	7275939	0.619616
Chr18	1580001	1600000	0.4133		Chr21	4400001	4600000	3.5e-05		Chr6	21000001	21200001	0.002685		Chr2	7277251	7280902	0.495936
Chr18	1600001	1620000	0.4124		Chr21	4600001	4800000	4.5e-05		Chr6	21200001	21400001	0.00311		Chr2	7291442	7296628	0.786944
Chr18	1620001	1640000	0.4154		Chr21	4800001	5000000	4e-05		Chr6	21400001	21600001	0.002735		Chr2	7297194	7307501	0.693658
Chr18	1640001	1660000	0.4125		Chr21	5000001	5200000	5e-06		Chr6	21600001	21626043	0.00023		Chr2	7308363	7315865	0.0702402
Chr18	1660001	1680000	0.4114		Chr21	5200001	5400000	0		Chr7	1	200001	0.00278		Chr2	7317713	7320637	0.642149
Chr18	1680001	1700000	0.4116		Chr21	5400001	5600000	2e-05		Chr7	200001	400001	0.0029		Chr2	7318723	7325270	0.00585336
Chr18	1700001	1720000	0.4145		Chr21	5600001	5800000	5.5e-05		Chr7	400001	600001	0.002855		Chr2	7325508	7331005	0.227133
Chr18	1720001	1740000	0.415		Chr21	5800001	6000000	2.5e-05		Chr7	600001	800001	0.002545		Chr2	7330361	7333996	0.0668326
Chr18	1740001	1760000	0.4163		Chr21	6000001	6200000	4e-05		Chr7	800001	1000001	0.00311		Chr2	7334800	7342019	0.414663
Chr18	1760001	1780000	0.4154		Chr21	6200001	6400000	4.5e-05		Chr7	1000001	1200001	0.0027		Chr2	7342114	7353050	0.220762
Chr18	1780001	1800000	0.4151		Chr21	6400001	6600000	1e-05		Chr7	1200001	1400001	0.002655		Chr2	7354046	7356122	0.675811
Chr18	1800001	1820000	0.4152		Chr21	6600001	6800000	2.5e-05		Chr7	1400001	1600001	0.00283		Chr2	7357476	7366733	0.351995
Chr18	1820001	1840000	0.4157		Chr21	6800001	7000000	1e-05		Chr7	1600001	1800001	0.002525		Chr2	7367069	7373381	0.964063
Chr18	1840001	1860000	0.4156		Chr21	7000001	7200000	3e-05		Chr7	1800001	2000001	0.002025		Chr2	7376906	7397110	0.671009
Chr18	1860001	1880000	0.4173		Chr21	7200001	7400000	4.5e-05		Chr7	2000001	2200001	0.00313		Chr2	7404582	7405179	0.111318
Chr18	1880001	1900000	0.4164		Chr21	7400001	7600000	3e-05		Chr7	2200001	2400001	0.00223		Chr2	7406267	7408091	0.350924
Chr18	1900001	1920000	0.4154		Chr21	7600001	7800000	1e-05		Chr7	2400001	2600001	0.00239		Chr2	7408276	7414618	0.932688
Chr18	1920001	1940000	0.4166		Chr21	7800001	8000000	6.5e-05		Chr7	2600001	2800001	0.002125		Chr2	7419145	7446220	0.650548
Chr18	1940001	1960000	0.416		Chr21	8000001	8200000	5e-05		Chr7	2800001	3000001	0.00222		Chr2	7498650	7503541	0.841332
Chr18	1960001	1980000	0.4169		Chr21	8200001	8400000	5e-05		Chr7	3000001	3200001	0.00221		Chr2	7503678	7559175	0.0640863
Chr18	1980001	2000000	0.4181		Chr21	8400001	8600000	3e-05		Chr7	3200001	3400001	0.00232		Chr2	7563340	7566690	0.384719
Chr18	2000001	2020000	0.4183		Chr21	8600001	8800000	7e-05		Chr7	3400001	3600001	0.001755		Chr2	7640995	7675890	0.648661
Chr18	2020001	2040000	0.4167		Chr21	8800001	9000000	4e-05		Chr7	3600001	3800001	0.00251		Chr2	7832746	7848939	0.204652
Chr18	2040001	2060000	0.4165		Chr21	9000001	9200000	3.5e-05		Chr7	3800001	4000001	0.002125		Chr2	7851629	7859566	0.208074
Chr18	2060001	2080000	0.4129		Chr21	9200001	9400000	8e-05		Chr7	4000001	4200001	0.002235		Chr2	7867393	7881325	0.118607
Chr18	2080001	2100000	0.413		Chr21	9400001	9600000	4e-05		Chr7	4200001	4400001	0.00228		Chr2	7911203	7932991	0.701129
Chr18	2100001	2120000	0.4144		Chr21	9600001	9800000	1e-05		Chr7	4400001	4600001	0.002815		Chr2	7931610	7944676	0.313411
Chr18	2120001	2140000	0.4141		Chr21	9800001	10000000	2.5e-05		Chr7	4600001	4800001	0.004145		Chr2	7945551	7954155	0.696946
Chr18	2140001	2160000	0.4137		Chr21	10000001	10200000	5e-05		Chr7	4800001	5000001	0.003595		Chr2	7957400	7962096	0.179863
Chr18	2160001	2180000	0.4119		Chr21	10200001	10400000	3.5e-05		Chr7	5000001	5200001	0.003065		Chr2	7968392	7992451	0.610544
Chr18	2180001	2200000	0.4114		Chr21	10400001	10600000	1.5e-05		Chr7	5200001	5400001	0.003285		Chr2	8056821	8117368	0.370064
Chr18	2200001	2220000	0.4103		Chr21	10600001	10800000	3e-05		Chr7	5400001	5600001	0.003255		Chr2	8369316	8375905	0.241288
Chr18	2220001	2240000	0.411		Chr21	10800001	11000000	4e-05		Chr7	5600001	5800001	0.003235		Chr2	8376196	8380207	0.174356
Chr18	2240001	2260000	0.4124		Chr21	11000001	11200000	2e-05		Chr7	5800001	6000001	0.00311		Chr2	8387207	8416295	0.721679
Chr18	2260001	2280000	0.415		Chr21	11200001	11400000	9e-05		Chr7	6000001	6200001	0.00332		Chr2	8439878	8545499	0.963449
Chr18	2280001	2300000	0.4146		Chr21	11400001	11600000	4e-05		Chr7	6200001	6400001	0.003485		Chr2	8561057	8626263	0.361359
Chr18	2300001	2320000	0.413		Chr21	11600001	11800000	2e-05		Chr7	6400001	6600001	0.003455		Chr2	8631814	8635651	0.176777
Chr18	2320001	2340000	0.4098		Chr21	11800001	12000000	9e-05		Chr7	6600001	6800001	0.00281		Chr2	8689950	8707250	0.18493
Chr18	2340001	2360000	0.4088		Chr21	12000001	12200000	2.5e-05		Chr7	6800001	7000001	0.000905		Chr2	8750320	8752584	0.944708
Chr18	2360001	2380000	0.4103		Chr21	12200001	12400000	3.5e-05		Chr7	7000001	7200001	0.00159		Chr2	8766155	8771665	0.895435
Chr18	2380001	2400000	0.4109		Chr21	12400001	12600000	5e-06		Chr7	7200001	7400001	0.001255		Chr2	8768135	8800818	1
Chr18	2400001	2420000	0.4103		Chr21	12600001	12800000	4e-05		Chr7	7400001	7600001	0.00098		Chr2	8802975	8813459	0.346479
Chr18	2420001	2440000	0.4086		Chr21	12800001	13000000	2.5e-05		Chr7	7600001	7800001	0.001535		Chr2	8813828	8817950	0.0684219
Chr18	2440001	2460000	0.4092		Chr21	13000001	13200000	5e-05		Chr7	7800001	8000001	0.00161		Chr2	8819756	8827289	0.393922
Chr18	2460001	2480000	0.4091		Chr21	13200001	13400000	1e-05		Chr7	8000001	8200001	0.001695		Chr2	8828176	8831323	0.904761
Chr18	2480001	2500000	0.4118		Chr21	13400001	13600000	2.5e-05		Chr7	8200001	8400001	0.001495		Chr2	8856695	8858842	0.162817
Chr18	2500001	2520000	0.4124		Chr21	13600001	13800000	2.5e-05		Chr7	8400001	8600001	0.001815		Chr2	8859186	8861263	0.208337
Chr18	2520001	2540000	0.4156		Chr21	13800001	14000000	3.5e-05		Chr7	8600001	8800001	0.001735		Chr2	8869047	8882786	0.297539
Chr18	2540001	2560000	0.4171		Chr21	14000001	14200000	5e-06		Chr7	8800001	9000001	0.00193		Chr2	8881169	8887066	0.315882
Chr18	2560001	2580000	0.4165		Chr21	14200001	14400000	5e-06		Chr7	9000001	9200001	0.002225		Chr2	8886680	8892524	0.141753
Chr18	2580001	2600000	0.4158		Chr21	14400001	14600000	7.5e-05		Chr7	9200001	9400001	0.002255		Chr2	8895022	8899009	0.35857
Chr18	2600001	2620000	0.4173		Chr21	14600001	14800000	8e-05		Chr7	9400001	9600001	0.00222		Chr2	8899044	8904075	0.842041
Chr18	2620001	2640000	0.4181		Chr21	14800001	15000000	8e-05		Chr7	9600001	9800001	0.002095		Chr2	8904505	8907338	0.130799
Chr18	2640001	2660000	0.4165		Chr21	15000001	15200000	3e-05		Chr7	9800001	10000001	0.00257		Chr2	8908171	8916222	0.410533
Chr18	2660001	2680000	0.4151		Chr21	15200001	15400000	2e-05		Chr7	10000001	10200001	0.0019		Chr2	8917582	8977407	0.826812
Chr18	2680001	2700000	0.4124		Chr21	15400001	15600000	4.5e-05		Chr7	10200001	10400001	0.00174		Chr2	8934945	8937855	0.696211
Chr18	2700001	2720000	0.4158		Chr21	15600001	15800000	6.5e-05		Chr7	10400001	10600001	0.002105		Chr2	8942078	8943552	0.698213
Chr18	2720001	2740000	0.4161		Chr21	15800001	16000000	4e-05		Chr7	10600001	10800001	0.002035		Chr2	8945266	8956912	0.386359
Chr18	2740001	2760000	0.4163		Chr21	16000001	16200000	1e-05		Chr7	10800001	11000001	0.00192		Chr2	8957298	8965715	0.449
Chr18	2760001	2780000	0.4149		Chr21	16200001	16400000	5e-06		Chr7	11000001	11200001	0.002145		Chr2	8967797	8995589	0.425577
Chr18	2780001	2800000	0.4144		Chr21	16400001	16600000	1.5e-05		Chr7	11200001	11400001	0.00181		Chr2	8996382	8999460	0.174178
Chr18	2800001	2820000	0.4149		Chr21	16600001	16800000	6e-05		Chr7	11400001	11600001	0.00231		Chr2	9000454	9009598	0.267527
Chr18	2820001	2840000	0.4149		Chr21	16800001	17000000	0.00017		Chr7	11600001	11800001	0.00198		Chr2	9009828	9012636	0.51285
Chr18	2840001	2860000	0.4183		Chr21	17000001	17200000	5e-06		Chr7	11800001	12000001	0.0018		Chr2	9013106	9019741	0.531765
Chr18	2860001	2880000	0.4284		Chr21	17200001	17400000	5e-06		Chr7	12000001	12200001	0.001695		Chr2	9021037	9029370	0.705781
Chr18	2880001	2900000	0.4422		Chr21	17400001	17600000	1.5e-05		Chr7	12200001	12400001	0.00173		Chr2	9030550	9033982	0.919594
Chr18	2900001	2920000	0.4577		Chr21	17600001	17800000	1e-05		Chr7	12400001	12600001	0.002235		Chr2	9033983	9038446	0.184364
Chr18	2920001	2940000	0.4744		Chr21	17800001	18000000	0.00012		Chr7	12600001	12800001	0.00188		Chr2	9040024	9045235	0.72021
Chr18	2940001	2960000	0.4916		Chr21	18000001	18200000	1.5e-05		Chr7	12800001	13000001	0.00251		Chr2	9064335	9086789	0.561712
Chr18	2960001	2980000	0.512		Chr21	18200001	18400000	5.5e-05		Chr7	13000001	13200001	0.001845		Chr2	9087745	9094415	0.411871
Chr18	2980001	3000000	0.5289		Chr21	18400001	18600000	4.5e-05		Chr7	13200001	13400001	0.002255		Chr2	9094872	9111666	0.990035
Chr18	3000001	3020000	0.5427		Chr21	18600001	18800000	5.5e-05		Chr7	13400001	13600001	0.00245		Chr2	9112040	9132686	0.0379678
Chr18	3020001	3040000	0.5617		Chr21	18800001	19000000	3e-05		Chr7	13600001	13800001	0.0019		Chr2	9133788	9141371	0.250014
Chr18	3040001	3060000	0.5743		Chr21	19000001	19200000	2.5e-05		Chr7	13800001	14000001	0.00193		Chr2	9142156	9147829	0.124884
Chr18	3060001	3080000	0.5797		Chr21	19200001	19400000	1e-05		Chr7	14000001	14200001	0.00226		Chr2	9150860	9154584	0.646168
Chr18	3080001	3100000	0.5756		Chr21	19400001	19600000	4e-05		Chr7	14200001	14400001	0.00176		Chr2	9162716	9166315	0.48003
Chr18	3100001	3120000	0.5753		Chr21	19600001	19800000	3.5e-05		Chr7	14400001	14600001	0.00179		Chr2	9167639	9172067	0.342982
Chr18	3120001	3140000	0.5741		Chr21	19800001	20000000	1.5e-05		Chr7	14600001	14800001	0.001955		Chr2	9171368	9171793	0.252142
Chr18	3140001	3160000	0.5701		Chr21	20000001	20200000	1e-05		Chr7	14800001	15000001	0.00195		Chr2	9172803	9174054	0.517178
Chr18	3160001	3180000	0.5638		Chr21	20200001	20400000	5e-05		Chr7	15000001	15200001	0.001445		Chr2	9176072	9179374	0.862409
Chr18	3180001	3200000	0.5571		Chr21	20400001	20600000	3.5e-05		Chr7	15200001	15400001	0.00181		Chr2	9181577	9186483	0.441657
Chr18	3200001	3220000	0.5552		Chr21	20600001	20800000	3.5e-05		Chr7	15400001	15600001	0.00163		Chr2	9187222	9193739	0.780263
Chr18	3220001	3240000	0.5473		Chr21	20800001	21000000	1.5e-05		Chr7	15600001	15800001	0.001825		Chr2	9193745	9228187	0.273921
Chr18	3240001	3260000	0.5457		Chr21	21000001	21200000	5.5e-05		Chr7	15800001	16000001	0.002065		Chr2	9234124	9237794	0.931986
Chr18	3260001	3280000	0.5451		Chr21	21200001	21400000	5e-05		Chr7	16000001	16200001	0.001785		Chr2	9241965	9249563	0.00031396
Chr18	3280001	3300000	0.5486		Chr21	21400001	21600000	2e-05		Chr7	16200001	16400001	0.00216		Chr2	9249571	9253092	0.595883
Chr18	3300001	3320000	0.544		Chr21	21600001	21800000	6.5e-05		Chr7	16400001	16600001	0.002295		Chr2	9253865	9258391	0.472723
Chr18	3320001	3340000	0.543		Chr21	21800001	22000000	2e-05		Chr7	16600001	16800001	0.00226		Chr2	9261567	9264253	0.282552
Chr18	3340001	3360000	0.5418		Chr21	22000001	22200000	1e-05		Chr7	16800001	17000001	0.00189		Chr2	9265215	9273834	0.36205
Chr18	3360001	3380000	0.5374		Chr21	22200001	22400000	2e-05		Chr7	17000001	17200001	0.00187		Chr2	9275202	9288194	0.599732
Chr18	3380001	3400000	0.5374		Chr21	22400001	22600000	5e-06		Chr7	17200001	17400001	0.00198		Chr2	9284582	9291867	0.967015
Chr18	3400001	3420000	0.5379		Chr21	22600001	22800000	5e-06		Chr7	17400001	17600001	0.002095		Chr2	9292642	9297035	0.0448075
Chr18	3420001	3440000	0.5403		Chr21	22800001	23000000	5e-06		Chr7	17600001	17800001	0.002035		Chr2	9297578	9302903	0.933132
Chr18	3440001	3460000	0.5336		Chr21	23000001	23200000	3e-05		Chr7	17800001	18000001	0.00236		Chr2	9303125	9305052	1
Chr18	3460001	3480000	0.5275		Chr21	23200001	23400000	1e-05		Chr7	18000001	18009646	6.5e-05		Chr2	9305561	9311714	0.00139787
Chr18	3480001	3500000	0.5233		Chr21	23400001	23600000	4.5e-05		Chr8	1	200001	0.00165		Chr2	9311763	9314655	0.139701
Chr18	3500001	3520000	0.5172		Chr21	23600001	23800000	4.5e-05		Chr8	200001	400001	0.001455		Chr2	9315074	9321714	0.253218
Chr18	3520001	3540000	0.5084		Chr21	23800001	24000000	1e-05		Chr8	400001	600001	0.00177		Chr2	9322465	9325363	0.925338
Chr18	3540001	3560000	0.5042		Chr21	24000001	24200000	1.5e-05		Chr8	600001	800001	0.00158		Chr2	9325460	9327050	0.128539
Chr18	3560001	3580000	0.5014		Chr21	24200001	24400000	1e-05		Chr8	800001	1000001	0.00145		Chr2	9327492	9334228	0.992953
Chr18	3580001	3600000	0.4987		Chr21	24400001	24600000	4.5e-05		Chr8	1000001	1200001	0.00143		Chr2	9334655	9345290	0.40971
Chr18	3600001	3620000	0.4943		Chr21	24600001	24800000	4e-05		Chr8	1200001	1400001	0.00133		Chr2	9344646	9345753	0.484998
Chr18	3620001	3640000	0.4876		Chr21	24800001	25000000	5e-05		Chr8	1400001	1600001	0.001245		Chr2	9346858	9348469	0.994707
Chr18	3640001	3660000	0.4874		Chr21	25000001	25200000	2.5e-05		Chr8	1600001	1800001	0.00106		Chr2	9350527	9356094	0.14093
Chr18	3660001	3680000	0.4827		Chr21	25200001	25400000	3e-05		Chr8	1800001	2000001	0.002495		Chr2	9358816	9361982	0.247985
Chr18	3680001	3700000	0.4801		Chr21	25400001	25600000	3.5e-05		Chr8	2000001	2200001	0.001825		Chr2	9362632	9364543	0.256865
Chr18	3700001	3720000	0.478		Chr21	25600001	25800000	4e-05		Chr8	2200001	2400001	0.00198		Chr2	9367111	9369230	0.186899
Chr18	3720001	3740000	0.477		Chr21	25800001	26000000	2e-05		Chr8	2400001	2600001	0.001805		Chr2	9369473	9375637	0.032425
Chr18	3740001	3760000	0.4721		Chr21	26000001	26200000	1e-05		Chr8	2600001	2800001	0.001435		Chr2	9375759	9387865	0.356155
Chr18	3760001	3780000	0.4703		Chr21	26200001	26400000	3e-05		Chr8	2800001	3000001	0.00181		Chr2	9387955	9393226	0.637863
Chr18	3780001	3800000	0.4691		Chr21	26400001	26600000	0		Chr8	3000001	3200001	0.002175		Chr2	9395248	9399753	0.116563
Chr18	3800001	3820000	0.4671		Chr22	1	200000	8e-05		Chr8	3200001	3400001	0.00222		Chr2	9399895	9411281	0.705783
Chr18	3820001	3840000	0.4695		Chr22	200001	400000	7e-05		Chr8	3400001	3600001	0.00231		Chr2	9413714	9417346	0.347918
Chr18	3840001	3860000	0.4721		Chr22	400001	600000	0.00012		Chr8	3600001	3800001	0.002595		Chr2	9418464	9428060	0.25352
Chr18	3860001	3880000	0.4735		Chr22	600001	800000	8e-05		Chr8	3800001	4000001	0.002615		Chr2	9428288	9433544	0.147306
Chr18	3880001	3900000	0.4756		Chr22	800001	1000000	0.00011		Chr8	4000001	4200001	0.00265		Chr2	9434042	9438663	0.242754
Chr18	3900001	3920000	0.4793		Chr22	1000001	1200000	9.5e-05		Chr8	4200001	4400001	0.00237		Chr2	9438126	9442788	0.00473516
Chr18	3920001	3940000	0.4807		Chr22	1200001	1400000	3e-05		Chr8	4400001	4600001	0.00224		Chr2	9443405	9450376	0.96476
Chr18	3940001	3960000	0.4831		Chr22	1400001	1600000	1.5e-05		Chr8	4600001	4800001	0.00229		Chr2	9450667	9453714	0.287381
Chr18	3960001	3980000	0.485		Chr22	1600001	1800000	1.5e-05		Chr8	4800001	5000001	0.00184		Chr2	9456230	9465749	0.384084
Chr18	3980001	4000000	0.4857		Chr22	1800001	2000000	3e-05		Chr8	5000001	5200001	0.001535		Chr2	9469640	9478974	0.0413632
[truncated: 19,022 more rows]

## Sheet: Fig.S5b
Individual	PC1	PC2	PC3	PC4	PC5	PC6	PC7	PC8	PC9	PC10	Species	Color	Shape
Had_10	0.24	0.0379	-0.0319	-0.0031	-0.0103	-0.0045	-0.0019	-0.0046	-0.0008	-0.0019	Had	#FF0000	1
Had_11	0.2376	0.0375	-0.0315	-0.0031	-0.0102	-0.0044	-0.0019	-0.0045	-0.0008	-0.0019	Had	#FF0000	1
Had_1	0.2398	0.0379	-0.0319	-0.0031	-0.0103	-0.0044	-0.0019	-0.0046	-0.0008	-0.0019	Had	#FF0000	1
Had_2	0.2387	0.0377	-0.0317	-0.0031	-0.0103	-0.0044	-0.0019	-0.0046	-0.0008	-0.0019	Had	#FF0000	1
Had_3	0.2399	0.0379	-0.0318	-0.0031	-0.0103	-0.0045	-0.0019	-0.0046	-0.0008	-0.0019	Had	#FF0000	1
Had_4	0.2395	0.0378	-0.0318	-0.0031	-0.0103	-0.0045	-0.0019	-0.0046	-0.0008	-0.0019	Had	#FF0000	1
Had_5	0.2391	0.0378	-0.0317	-0.0031	-0.0103	-0.0045	-0.0019	-0.0046	-0.0008	-0.0019	Had	#FF0000	1
Had_6	0.2392	0.0378	-0.0317	-0.0031	-0.0103	-0.0044	-0.0019	-0.0046	-0.0008	-0.0019	Had	#FF0000	1
Had_7	0.239	0.0377	-0.0317	-0.0031	-0.0103	-0.0045	-0.0019	-0.0046	-0.0008	-0.0019	Had	#FF0000	1
Had_8	0.2381	0.0376	-0.0316	-0.0031	-0.0103	-0.0044	-0.0019	-0.0046	-0.0008	-0.0019	Had	#FF0000	1
Had_9	0.2399	0.0379	-0.0319	-0.0031	-0.0103	-0.0045	-0.0019	-0.0046	-0.0008	-0.0019	Had	#FF0000	1
Had_S1	0.2386	0.0377	-0.0317	-0.0031	-0.0103	-0.0044	-0.0019	-0.0046	-0.0008	-0.0019	Had	#FF0000	1
Had_S2	0.2379	0.0376	-0.0315	-0.0031	-0.0102	-0.0044	-0.0019	-0.0046	-0.0008	-0.0019	Had	#FF0000	1
Had_S3	0.2372	0.0375	-0.0314	-0.0031	-0.0102	-0.0044	-0.0019	-0.0045	-0.0008	-0.0019	Had	#FF0000	1
Had_S4	0.2382	0.0376	-0.0316	-0.0031	-0.0102	-0.0044	-0.0019	-0.0046	-0.0008	-0.0019	Had	#FF0000	1
Had_S6	0.2391	0.0377	-0.0317	-0.0031	-0.0103	-0.0044	-0.0019	-0.0046	-0.0008	-0.0019	Had	#FF0000	1
Hag_10	-0.0126	0.0049	0.0318	-0.0291	-0.0513	-0.0037	-0.0089	-0.0392	-0.0007	-0.0066	Hag	#FF9900	2
Hag_11	-0.0128	0.005	0.0324	-0.0298	-0.0525	-0.0037	-0.0091	-0.0404	-0.0007	-0.0069	Hag	#FF9900	2
Hag_12	-0.0127	0.005	0.0324	-0.0298	-0.0525	-0.0037	-0.0091	-0.0404	-0.0007	-0.0069	Hag	#FF9900	2
Hag_1	-0.0125	0.0049	0.032	-0.0292	-0.0519	-0.0037	-0.009	-0.0398	-0.0007	-0.0067	Hag	#FF9900	2
Hag_2	-0.0128	0.0049	0.0324	-0.0299	-0.0526	-0.0037	-0.0092	-0.0405	-0.0007	-0.0069	Hag	#FF9900	2
Hag_3	-0.0128	0.0049	0.0324	-0.0299	-0.0525	-0.0037	-0.0091	-0.0404	-0.0007	-0.0069	Hag	#FF9900	2
Hag_4	-0.0128	0.0049	0.0325	-0.03	-0.0528	-0.0037	-0.0092	-0.0407	-0.0007	-0.007	Hag	#FF9900	2
Hag_5	-0.0127	0.0049	0.0323	-0.0298	-0.0524	-0.0037	-0.0091	-0.0403	-0.0007	-0.0069	Hag	#FF9900	2
Hag_6	-0.0128	0.005	0.0324	-0.0299	-0.0525	-0.0037	-0.0092	-0.0404	-0.0007	-0.0069	Hag	#FF9900	2
Hag_8	-0.0126	0.0049	0.0319	-0.0294	-0.0513	-0.0037	-0.0088	-0.0394	-0.0007	-0.0067	Hag	#FF9900	2
Hag_S10	-0.0127	0.0049	0.0324	-0.0299	-0.0524	-0.0037	-0.0091	-0.0403	-0.0007	-0.0069	Hag	#FF9900	2
Hag_S11	-0.0127	0.0049	0.0323	-0.0298	-0.0524	-0.0037	-0.0091	-0.0403	-0.0007	-0.0069	Hag	#FF9900	2
Hag_S12	-0.0127	0.0049	0.0322	-0.0297	-0.0521	-0.0037	-0.0091	-0.04	-0.0007	-0.0068	Hag	#FF9900	2
Hag_S3	-0.0128	0.0049	0.0324	-0.0299	-0.0525	-0.0037	-0.0092	-0.0404	-0.0007	-0.0069	Hag	#FF9900	2
Hag_S4	-0.0128	0.0049	0.0324	-0.0299	-0.0525	-0.0037	-0.0092	-0.0404	-0.0007	-0.0069	Hag	#FF9900	2
Hag_S5	-0.0127	0.0049	0.0323	-0.0298	-0.0522	-0.0037	-0.0091	-0.0402	-0.0007	-0.0068	Hag	#FF9900	2
Hag_S6	-0.0128	0.0049	0.0324	-0.0299	-0.0525	-0.0037	-0.0091	-0.0404	-0.0007	-0.0069	Hag	#FF9900	2
Hag_S8	-0.0127	0.0049	0.0324	-0.0299	-0.0524	-0.0037	-0.0091	-0.0403	-0.0007	-0.0069	Hag	#FF9900	2
Hbb_10	-0.006	-0.0081	0.0202	-0.0071	0.0957	-0.0345	0.1097	-0.0283	-0.0016	-0.0105	Hbb	#0000FF	3
Hbb_11	-0.006	-0.008	0.0201	-0.0071	0.0953	-0.0344	0.1093	-0.0282	-0.0015	-0.0104	Hbb	#0000FF	3
Hbb_12	-0.006	-0.0078	0.02	-0.0071	0.0945	-0.0341	0.1087	-0.0279	-0.0015	-0.0103	Hbb	#0000FF	3
Hbb_13	-0.006	-0.008	0.0202	-0.0071	0.0954	-0.0344	0.1096	-0.0283	-0.0015	-0.0104	Hbb	#0000FF	3
Hbb_14	-0.006	-0.0081	0.0203	-0.0072	0.0963	-0.0348	0.1108	-0.0286	-0.0016	-0.0107	Hbb	#0000FF	3
Hbb_15	-0.006	-0.0079	0.0199	-0.0071	0.0942	-0.034	0.108	-0.0278	-0.0015	-0.0102	Hbb	#0000FF	3
Hbb_16	-0.006	-0.0082	0.0204	-0.0072	0.097	-0.035	0.1115	-0.0288	-0.0016	-0.0107	Hbb	#0000FF	3
Hbb_17	-0.006	-0.0081	0.0203	-0.0071	0.0965	-0.0348	0.1108	-0.0286	-0.0015	-0.0106	Hbb	#0000FF	3
Hbb_18	-0.0058	-0.008	0.0202	-0.0071	0.0953	-0.0345	0.1096	-0.0284	-0.0016	-0.0105	Hbb	#0000FF	3
Hbb_19	-0.006	-0.0082	0.0204	-0.0072	0.097	-0.035	0.1116	-0.0289	-0.0016	-0.0108	Hbb	#0000FF	3
Hbb_1	-0.006	-0.0079	0.0201	-0.0071	0.0951	-0.0344	0.1084	-0.0281	-0.0016	-0.0103	Hbb	#0000FF	3
Hbb_20	-0.006	-0.0082	0.0204	-0.0072	0.0971	-0.035	0.1117	-0.0289	-0.0016	-0.0108	Hbb	#0000FF	3
Hbb_2	-0.0059	-0.0078	0.0197	-0.007	0.0931	-0.0335	0.106	-0.0273	-0.0014	-0.0099	Hbb	#0000FF	3
Hbb_3	-0.0059	-0.0078	0.0196	-0.0069	0.0922	-0.0332	0.105	-0.027	-0.0013	-0.0097	Hbb	#0000FF	3
Hbb_4	-0.006	-0.0081	0.0203	-0.0072	0.0967	-0.0349	0.1111	-0.0287	-0.0016	-0.0107	Hbb	#0000FF	3
Hbb_5	-0.006	-0.0082	0.0205	-0.0072	0.0978	-0.0353	0.1125	-0.0291	-0.0016	-0.0109	Hbb	#0000FF	3
Hbb_6	-0.006	-0.0081	0.0203	-0.0071	0.0963	-0.0348	0.1107	-0.0286	-0.0016	-0.0106	Hbb	#0000FF	3
Hbb_7	-0.006	-0.0081	0.0203	-0.0072	0.0966	-0.0349	0.111	-0.0287	-0.0016	-0.0107	Hbb	#0000FF	3
Hbb_8	-0.0059	-0.0078	0.0197	-0.0069	0.0927	-0.0333	0.1056	-0.0271	-0.0013	-0.0098	Hbb	#0000FF	3
Hbb_9	-0.006	-0.0081	0.0203	-0.0071	0.0962	-0.0347	0.1106	-0.0285	-0.0016	-0.0106	Hbb	#0000FF	3
Hcc_10	-0.0116	0.0046	0.0291	-0.0266	-0.0453	-0.0032	-0.0075	-0.0321	-0.0003	-0.004	Hcc	#FF99FF	4
Hcc_11	-0.0116	0.0045	0.029	-0.0265	-0.0452	-0.0032	-0.0075	-0.032	-0.0003	-0.004	Hcc	#FF99FF	4
Hfc_70	-0.0117	0.0046	0.0295	-0.027	-0.0461	-0.0032	-0.0077	-0.0328	-0.0003	-0.0042	Hfc	#00CC66	7
Hfc_71	-0.0117	0.0045	0.0294	-0.0268	-0.0457	-0.0032	-0.0074	-0.0325	-0.0003	-0.0043	Hfc	#00CC66	7
Hcc_15	-0.0115	0.0046	0.0288	-0.0261	-0.0449	-0.0032	-0.0074	-0.0317	-0.0003	-0.0039	Hcc	#FF99FF	4
Hcc_2	-0.0117	0.0045	0.0292	-0.0267	-0.0456	-0.0032	-0.0076	-0.0323	-0.0003	-0.0041	Hcc	#FF99FF	4
Hcc_6	-0.0113	0.0045	0.0282	-0.0256	-0.0437	-0.0031	-0.0071	-0.0307	-0.0003	-0.0036	Hcc	#FF99FF	4
Hcc_7	-0.0117	0.0045	0.0293	-0.0266	-0.0458	-0.0032	-0.0076	-0.0325	-0.0003	-0.0041	Hcc	#FF99FF	4
Hcc_8	-0.0115	0.0046	0.0289	-0.0263	-0.0451	-0.0032	-0.0075	-0.0319	-0.0003	-0.004	Hcc	#FF99FF	4
Hcc_9	-0.0115	0.0045	0.0287	-0.0261	-0.0447	-0.0032	-0.0073	-0.0316	-0.0003	-0.0039	Hcc	#FF99FF	4
Hcd_8	-0.0092	-0.1228	-0.1302	-0.0272	-0.0161	-0.0049	-0.002	-0.0025	0.6786	-0.0024	Hcd	#000000	23
Hcd_S7	-0.0092	-0.1236	-0.1311	-0.0273	-0.0162	-0.0049	-0.002	-0.0025	0.6829	-0.0025	Hcd	#000000	23
Hcm_10	-0.0052	-0.0065	0.0167	-0.006	0.0708	-0.0248	0.072	-0.0172	-0.0004	0.0004	Hcm	#00FF00	5
Hcm_11	-0.0052	-0.0064	0.0166	-0.006	0.0702	-0.0246	0.0714	-0.017	-0.0004	0.0004	Hcm	#00FF00	5
Hcm_12	-0.0052	-0.0063	0.0165	-0.006	0.0694	-0.0243	0.0706	-0.0168	-0.0004	0.0005	Hcm	#00FF00	5
Hcm_13	-0.0052	-0.0065	0.0168	-0.006	0.0713	-0.025	0.0725	-0.0173	-0.0004	0.0002	Hcm	#00FF00	5
Hcm_14	-0.0052	-0.0063	0.0165	-0.006	0.0697	-0.0244	0.0709	-0.0168	-0.0004	0.0005	Hcm	#00FF00	5
Hcm_15	-0.0052	-0.0063	0.0166	-0.006	0.0698	-0.0245	0.0709	-0.0169	-0.0004	0.0004	Hcm	#00FF00	5
Hcm_16	-0.0052	-0.0064	0.0166	-0.006	0.0701	-0.0246	0.0713	-0.0169	-0.0004	0.0003	Hcm	#00FF00	5
Hcm_17	-0.0053	-0.0067	0.0173	-0.0063	0.0723	-0.0255	0.074	-0.0179	-0.0004	-0.0001	Hcm	#00FF00	5
Hcm_18	-0.0053	-0.0067	0.0173	-0.0063	0.0718	-0.0254	0.0736	-0.0179	-0.0004	-0.0001	Hcm	#00FF00	5
Hcm_19	-0.0053	-0.0067	0.0169	-0.0059	0.0722	-0.0253	0.0735	-0.0177	-0.0004	0.0003	Hcm	#00FF00	5
Hcm_1	-0.0052	-0.0062	0.0164	-0.006	0.0688	-0.0241	0.0701	-0.0166	-0.0004	0.0005	Hcm	#00FF00	5
Hcm_20	-0.0053	-0.0069	0.0172	-0.0061	0.0739	-0.0258	0.0752	-0.0182	-0.0004	0.0002	Hcm	#00FF00	5
Hcm_2	-0.0053	-0.0068	0.0171	-0.0061	0.0734	-0.0257	0.0747	-0.018	-0.0004	0.0002	Hcm	#00FF00	5
Hcm_3	-0.0053	-0.0067	0.017	-0.006	0.0724	-0.0253	0.0736	-0.0177	-0.0004	0.0003	Hcm	#00FF00	5
Hcm_4	-0.0052	-0.0065	0.0167	-0.006	0.0708	-0.0248	0.0721	-0.0173	-0.0004	0.0005	Hcm	#00FF00	5
Hcm_5	-0.0053	-0.0067	0.017	-0.006	0.0723	-0.0253	0.0736	-0.0177	-0.0004	0.0003	Hcm	#00FF00	5
Hcm_7	-0.0052	-0.0065	0.0168	-0.006	0.0712	-0.0249	0.0724	-0.0173	-0.0004	0.0004	Hcm	#00FF00	5
Hcm_8	-0.0052	-0.0063	0.0165	-0.006	0.0693	-0.0243	0.0706	-0.0168	-0.0004	0.0006	Hcm	#00FF00	5
Hcm_9	-0.0052	-0.0062	0.0164	-0.006	0.0689	-0.0242	0.0702	-0.0167	-0.0004	0.0006	Hcm	#00FF00	5
Hcp_11	-0.0123	0.0048	0.031	-0.0285	-0.0497	-0.0035	-0.0086	-0.0374	-0.0004	-0.006	Hcp	#B68578	25
Hcp_6	-0.0123	0.0048	0.031	-0.0286	-0.0497	-0.0035	-0.0086	-0.0374	-0.0004	-0.006	Hcp	#B68578	25
Hcp_S14	-0.0123	0.0047	0.0312	-0.0288	-0.0501	-0.0035	-0.0086	-0.0378	-0.0003	-0.0061	Hcp	#B68578	25
Hcp_S18	-0.0123	0.0047	0.0309	-0.0285	-0.0496	-0.0035	-0.0085	-0.0372	-0.0004	-0.006	Hcp	#B68578	25
Hcp_S19	-0.0123	0.0047	0.0311	-0.0287	-0.05	-0.0035	-0.0086	-0.0376	-0.0004	-0.0061	Hcp	#B68578	25
Hcp_S4	-0.0123	0.0047	0.031	-0.0286	-0.0499	-0.0035	-0.0086	-0.0375	-0.0004	-0.0061	Hcp	#B68578	25
Hcp_S5	-0.0123	0.0048	0.031	-0.0285	-0.0496	-0.0034	-0.0085	-0.0373	-0.0004	-0.006	Hcp	#B68578	25
Het_10	-0.0066	0.0058	0.0057	-0.0058	-0.0013	0	0.0021	0.007	0.0016	0.0155	Het	#CC0000	6
Het_11	-0.0067	0.0057	0.0057	-0.0058	-0.0014	0	0.0021	0.007	0.0016	0.0154	Het	#CC0000	6
Het_12	-0.0067	0.0058	0.0057	-0.0058	-0.0013	0	0.0021	0.0071	0.0017	0.0159	Het	#CC0000	6
Het_13	-0.0067	0.0058	0.0057	-0.0058	-0.0014	0	0.0021	0.007	0.0016	0.0155	Het	#CC0000	6
Het_14	-0.0067	0.0058	0.0057	-0.0058	-0.0013	0	0.0021	0.0071	0.0016	0.0156	Het	#CC0000	6
Het_15	-0.0067	0.0058	0.0057	-0.0058	-0.0013	0	0.0021	0.0071	0.0016	0.0157	Het	#CC0000	6
Het_16	-0.0067	0.0058	0.0057	-0.0058	-0.0013	0	0.0021	0.0071	0.0016	0.0157	Het	#CC0000	6
Het_17	-0.0066	0.0057	0.0057	-0.0057	-0.0013	0	0.0021	0.0069	0.0015	0.015	Het	#CC0000	6
Het_18	-0.0067	0.0058	0.0058	-0.0058	-0.0014	0	0.0021	0.0071	0.0016	0.0157	Het	#CC0000	6
Het_19	-0.0067	0.0058	0.0058	-0.0058	-0.0014	0	0.0021	0.007	0.0016	0.0156	Het	#CC0000	6
Het_1	-0.0067	0.0058	0.0056	-0.0057	-0.0013	0	0.0021	0.007	0.0017	0.0155	Het	#CC0000	6
Het_20	-0.0067	0.0058	0.0057	-0.0058	-0.0013	0	0.0021	0.0071	0.0016	0.0157	Het	#CC0000	6
Het_2	-0.0066	0.0057	0.0057	-0.0057	-0.0013	0	0.0021	0.007	0.0016	0.0152	Het	#CC0000	6
Het_3	-0.0067	0.0058	0.0057	-0.0057	-0.0013	0	0.0021	0.007	0.0016	0.0155	Het	#CC0000	6
Het_4	-0.0067	0.0058	0.0057	-0.0058	-0.0013	0	0.0021	0.007	0.0016	0.0155	Het	#CC0000	6
Het_6	-0.0067	0.0057	0.0057	-0.0058	-0.0013	0	0.0021	0.007	0.0016	0.0155	Het	#CC0000	6
Het_7	-0.0067	0.0058	0.0057	-0.0058	-0.0013	0	0.0021	0.007	0.0016	0.0155	Het	#CC0000	6
Het_8	-0.0066	0.0057	0.0057	-0.0057	-0.0013	0	0.0021	0.007	0.0016	0.0153	Het	#CC0000	6
Het_9	-0.0067	0.0058	0.0057	-0.0058	-0.0014	0	0.0021	0.007	0.0016	0.0155	Het	#CC0000	6
Het_S1	-0.0065	0.0057	0.0057	-0.0057	-0.0013	0	0.002	0.0069	0.0015	0.0149	Het	#CC0000	6
Het_S2	-0.0066	0.0057	0.0057	-0.0057	-0.0013	0	0.002	0.0069	0.0015	0.0149	Het	#CC0000	6
Hfc_15	-0.0117	0.0045	0.0292	-0.0266	-0.0455	-0.0032	-0.0075	-0.0323	-0.0003	-0.0041	Hfc	#00CC66	7
Hfc_23	-0.0117	0.0045	0.0293	-0.0268	-0.0457	-0.0032	-0.0076	-0.0325	-0.0003	-0.0041	Hfc	#00CC66	7
Hfc_2	-0.0116	0.0045	0.029	-0.0265	-0.0452	-0.0032	-0.0075	-0.032	-0.0003	-0.004	Hfc	#00CC66	7
Hfc_35	-0.0116	0.0045	0.029	-0.0265	-0.0452	-0.0032	-0.0075	-0.032	-0.0003	-0.004	Hfc	#00CC66	7
Hfc_36	-0.0116	0.0045	0.0291	-0.0266	-0.0453	-0.0032	-0.0075	-0.0321	-0.0003	-0.004	Hfc	#00CC66	7
Hfc_38	-0.0116	0.0045	0.0291	-0.0265	-0.0453	-0.0032	-0.0075	-0.032	-0.0003	-0.004	Hfc	#00CC66	7
Hfc_39	-0.0117	0.0046	0.0294	-0.0268	-0.0459	-0.0032	-0.0076	-0.0326	-0.0003	-0.0042	Hfc	#00CC66	7
Hfc_3	-0.0118	0.0046	0.0296	-0.0271	-0.0464	-0.0032	-0.0077	-0.0331	-0.0003	-0.0043	Hfc	#00CC66	7
Hfc_44	-0.0116	0.0045	0.029	-0.0265	-0.0452	-0.0032	-0.0075	-0.032	-0.0003	-0.004	Hfc	#00CC66	7
Hfc_47	-0.0117	0.0045	0.0292	-0.0267	-0.0455	-0.0032	-0.0075	-0.0322	-0.0003	-0.0041	Hfc	#00CC66	7
Hfc_48	-0.0118	0.0046	0.0297	-0.0272	-0.0466	-0.0032	-0.0078	-0.0333	-0.0003	-0.0044	Hfc	#00CC66	7
Hfc_49	-0.0118	0.0046	0.0296	-0.027	-0.0463	-0.0032	-0.0077	-0.0329	-0.0003	-0.0043	Hfc	#00CC66	7
Hfc_56	-0.0117	0.0045	0.0293	-0.0268	-0.0457	-0.0032	-0.0076	-0.0325	-0.0003	-0.0041	Hfc	#00CC66	7
Hfc_5	-0.0117	0.0045	0.0292	-0.0266	-0.0456	-0.0032	-0.0076	-0.0323	-0.0003	-0.0041	Hfc	#00CC66	7
Hfc_62	-0.0117	0.0045	0.0294	-0.0268	-0.0459	-0.0032	-0.0076	-0.0326	-0.0003	-0.0042	Hfc	#00CC66	7
Hfc_S4	-0.0116	0.0045	0.0292	-0.0267	-0.0456	-0.0032	-0.0076	-0.0324	-0.0003	-0.0041	Hfc	#00CC66	7
Hfc_S8	-0.0116	0.0045	0.0293	-0.0267	-0.0457	-0.0032	-0.0076	-0.0324	-0.0003	-0.0041	Hfc	#00CC66	7
Hhc_11	-0.0074	0.0066	0.0063	-0.0065	-0.0015	0.0001	0.0026	0.0092	0.0027	0.0267	Hhc	#009999	8
Hhc_12	-0.0074	0.0066	0.0063	-0.0065	-0.0015	0.0001	0.0026	0.0092	0.0027	0.0269	Hhc	#009999	8
Hhc_13	-0.0074	0.0065	0.0063	-0.0064	-0.0016	0.0001	0.0026	0.009	0.0026	0.0264	Hhc	#009999	8
Hhc_15	-0.0074	0.0066	0.0063	-0.0065	-0.0016	0.0001	0.0026	0.0091	0.0027	0.0265	Hhc	#009999	8
Hhc_16	-0.0073	0.0065	0.0063	-0.0064	-0.0016	0.0001	0.0026	0.0089	0.0026	0.0262	Hhc	#009999	8
Hhc_18	-0.0074	0.0066	0.0063	-0.0065	-0.0015	0.0001	0.0027	0.0092	0.0027	0.0268	Hhc	#009999	8
Hhc_19	-0.0074	0.0066	0.0063	-0.0065	-0.0015	0.0001	0.0027	0.0092	0.0027	0.0269	Hhc	#009999	8
Hhc_1	-0.0074	0.0066	0.0063	-0.0065	-0.0016	0.0001	0.0026	0.0092	0.0027	0.0269	Hhc	#009999	8
Hhc_20	-0.0074	0.0066	0.0063	-0.0065	-0.0015	0.0001	0.0026	0.0092	0.0027	0.0266	Hhc	#009999	8
Hhc_2	-0.0074	0.0066	0.0063	-0.0065	-0.0015	0.0001	0.0026	0.0092	0.0027	0.0268	Hhc	#009999	8
Hhc_3	-0.0074	0.0066	0.0063	-0.0064	-0.0016	0.0001	0.0026	0.0092	0.0027	0.0266	Hhc	#009999	8
Hhc_4	-0.0074	0.0066	0.0063	-0.0065	-0.0015	0.0002	0.0027	0.0093	0.0028	0.0273	Hhc	#009999	8
Hhc_5	-0.0074	0.0066	0.0063	-0.0065	-0.0016	0.0001	0.0026	0.0093	0.0027	0.027	Hhc	#009999	8
Hhc_6	-0.0074	0.0065	0.0063	-0.0064	-0.0015	0.0001	0.0026	0.0091	0.0026	0.0266	Hhc	#009999	8
Hhc_7	-0.0074	0.0066	0.0063	-0.0065	-0.0015	0.0001	0.0026	0.0092	0.0027	0.0269	Hhc	#009999	8
Hhc_8	-0.0074	0.0066	0.0063	-0.0065	-0.0015	0.0001	0.0026	0.0092	0.0027	0.0267	Hhc	#009999	8
Hht_10	-0.0057	-0.009	0.0198	-0.0064	0.1148	-0.0474	-0.1632	-0.0056	-0.0009	-0.0041	Hht	#FF00FF	9
Hht_11	-0.0057	-0.009	0.0199	-0.0064	0.1149	-0.0475	-0.1634	-0.0057	-0.0009	-0.0041	Hht	#FF00FF	9
Hht_12	-0.0056	-0.0089	0.0197	-0.0064	0.1138	-0.047	-0.1617	-0.0056	-0.0009	-0.004	Hht	#FF00FF	9
Hht_13	-0.0056	-0.0088	0.0196	-0.0064	0.1132	-0.0468	-0.1607	-0.0055	-0.0009	-0.004	Hht	#FF00FF	9
Hht_14	-0.0057	-0.009	0.0198	-0.0064	0.1146	-0.0474	-0.163	-0.0056	-0.0009	-0.0041	Hht	#FF00FF	9
Hht_15	-0.0056	-0.0089	0.0197	-0.0064	0.1138	-0.047	-0.1617	-0.0055	-0.0009	-0.0041	Hht	#FF00FF	9
Hht_16	-0.0057	-0.0089	0.0198	-0.0065	0.1132	-0.0468	-0.1609	-0.0046	-0.0009	-0.0048	Hht	#FF00FF	9
Hht_17	-0.0057	-0.0089	0.0198	-0.0064	0.1144	-0.0473	-0.1626	-0.0056	-0.0009	-0.0041	Hht	#FF00FF	9
Hht_18	-0.0057	-0.0091	0.02	-0.0064	0.1161	-0.048	-0.1652	-0.0057	-0.0009	-0.0043	Hht	#FF00FF	9
Hht_19	-0.0057	-0.0089	0.0197	-0.0064	0.1138	-0.047	-0.1618	-0.0056	-0.0009	-0.004	Hht	#FF00FF	9
Hht_1	-0.0057	-0.0089	0.0197	-0.0064	0.114	-0.0471	-0.162	-0.0056	-0.0009	-0.004	Hht	#FF00FF	9
Hht_20	-0.0057	-0.009	0.0198	-0.0064	0.1146	-0.0474	-0.163	-0.0056	-0.0009	-0.0041	Hht	#FF00FF	9
Hht_21	-0.0057	-0.0091	0.02	-0.0064	0.1158	-0.0478	-0.1647	-0.0057	-0.0009	-0.0042	Hht	#FF00FF	9
Hht_22	-0.0057	-0.0091	0.02	-0.0064	0.1157	-0.0478	-0.1647	-0.0057	-0.0009	-0.0042	Hht	#FF00FF	9
Hht_2	-0.0057	-0.0089	0.0197	-0.0064	0.1139	-0.0471	-0.1619	-0.0056	-0.0009	-0.004	Hht	#FF00FF	9
Hht_3	-0.0057	-0.0089	0.0197	-0.0064	0.1138	-0.047	-0.1617	-0.0056	-0.0009	-0.004	Hht	#FF00FF	9
Hht_4	-0.0057	-0.0089	0.0197	-0.0064	0.1139	-0.0471	-0.162	-0.0056	-0.0009	-0.004	Hht	#FF00FF	9
Hht_5	-0.0057	-0.009	0.0198	-0.0064	0.1145	-0.0473	-0.1628	-0.0056	-0.0009	-0.0041	Hht	#FF00FF	9
Hht_6	-0.0057	-0.009	0.0198	-0.0064	0.1147	-0.0474	-0.163	-0.0056	-0.0009	-0.0041	Hht	#FF00FF	9
Hht_7	-0.0057	-0.0089	0.0198	-0.0064	0.1141	-0.0471	-0.162	-0.0056	-0.0009	-0.0041	Hht	#FF00FF	9
Hht_8	-0.0057	-0.009	0.0198	-0.0064	0.1144	-0.0473	-0.1627	-0.0056	-0.0009	-0.0041	Hht	#FF00FF	9
Hht_9	-0.0057	-0.0089	0.0198	-0.0064	0.1142	-0.0472	-0.1623	-0.0056	-0.0009	-0.004	Hht	#FF00FF	9
Hig_11	-0.0123	0.0048	0.0311	-0.0287	-0.05	-0.0035	-0.0086	-0.0377	-0.0004	-0.0062	Hig	#CCFF00	10
Hig_12	-0.0124	0.0048	0.0312	-0.0288	-0.0503	-0.0035	-0.0087	-0.038	-0.0004	-0.0062	Hig	#CCFF00	10
Hig_13	-0.0123	0.0048	0.0311	-0.0286	-0.0499	-0.0035	-0.0086	-0.0376	-0.0004	-0.0061	Hig	#CCFF00	10
Hig_14	-0.0124	0.0048	0.0314	-0.0289	-0.0505	-0.0035	-0.0087	-0.0382	-0.0004	-0.0063	Hig	#CCFF00	10
Hig_16	-0.0121	0.0047	0.0304	-0.028	-0.0483	-0.0034	-0.0081	-0.0362	-0.0004	-0.0059	Hig	#CCFF00	10
Hig_17	-0.0123	0.0048	0.031	-0.0285	-0.0497	-0.0034	-0.0085	-0.0374	-0.0004	-0.0061	Hig	#CCFF00	10
Hig_18	-0.0123	0.0048	0.0308	-0.0284	-0.0494	-0.0034	-0.0085	-0.0372	-0.0004	-0.006	Hig	#CCFF00	10
Hig_19	-0.0123	0.0048	0.0311	-0.0287	-0.05	-0.0035	-0.0086	-0.0377	-0.0004	-0.0062	Hig	#CCFF00	10
Hig_1	-0.0123	0.0048	0.031	-0.0285	-0.0498	-0.0034	-0.0086	-0.0375	-0.0004	-0.0061	Hig	#CCFF00	10
Hig_20	-0.0123	0.0048	0.0311	-0.0287	-0.0499	-0.0035	-0.0086	-0.0376	-0.0004	-0.0062	Hig	#CCFF00	10
Hig_22	-0.0124	0.0048	0.0313	-0.0288	-0.0503	-0.0035	-0.0087	-0.038	-0.0004	-0.0063	Hig	#CCFF00	10
Hig_3	-0.0123	0.0048	0.0311	-0.0287	-0.05	-0.0035	-0.0086	-0.0377	-0.0004	-0.0062	Hig	#CCFF00	10
Hig_4	-0.0123	0.0048	0.031	-0.0286	-0.0499	-0.0035	-0.0086	-0.0376	-0.0004	-0.0061	Hig	#CCFF00	10
Hig_5	-0.0123	0.0048	0.0311	-0.0287	-0.05	-0.0035	-0.0086	-0.0377	-0.0004	-0.0061	Hig	#CCFF00	10
Hig_6	-0.0123	0.0048	0.031	-0.0286	-0.0498	-0.0034	-0.0086	-0.0375	-0.0004	-0.0061	Hig	#CCFF00	10
Hig_7	-0.0123	0.0048	0.0308	-0.0284	-0.0495	-0.0034	-0.0085	-0.0372	-0.0004	-0.006	Hig	#CCFF00	10
Hig_8	-0.0124	0.0048	0.0312	-0.0287	-0.0501	-0.0035	-0.0086	-0.0378	-0.0004	-0.0062	Hig	#CCFF00	10
Hig_9	-0.0123	0.0048	0.031	-0.0285	-0.0497	-0.0035	-0.0086	-0.0374	-0.0004	-0.006	Hig	#CCFF00	10
Hig_S1	-0.0124	0.0048	0.0313	-0.0288	-0.0504	-0.0035	-0.0087	-0.038	-0.0004	-0.0063	Hig	#CCFF00	10
Hig_S2	-0.0124	0.0048	0.0313	-0.0289	-0.0505	-0.0035	-0.0087	-0.0382	-0.0004	-0.0063	Hig	#CCFF00	10
Hjk_S10	-0.0112	-0.1412	-0.1488	-0.0337	-0.0206	-0.0078	-0.0023	-0.0038	-0.0606	-0.0021	Hjk	#4788E7	0
Hjk_S11	-0.0112	-0.1415	-0.1491	-0.0337	-0.0206	-0.0078	-0.0023	-0.0038	-0.0607	-0.0021	Hjk	#4788E7	0
Hjk_S12	-0.0112	-0.1411	-0.1486	-0.0336	-0.0206	-0.0078	-0.0023	-0.0038	-0.0605	-0.0021	Hjk	#4788E7	0
Hjk_S13	-0.0112	-0.141	-0.1485	-0.0336	-0.0206	-0.0078	-0.0022	-0.0038	-0.0604	-0.0021	Hjk	#4788E7	0
Hjk_S15	-0.0112	-0.141	-0.1485	-0.0336	-0.0205	-0.0078	-0.0023	-0.0038	-0.0605	-0.0021	Hjk	#4788E7	0
Hjk_S16	-0.0112	-0.1407	-0.1483	-0.0336	-0.0205	-0.0078	-0.0022	-0.0038	-0.0602	-0.0021	Hjk	#4788E7	0
Hjk_S18	-0.0112	-0.1412	-0.1488	-0.0337	-0.0206	-0.0078	-0.0023	-0.0038	-0.0606	-0.0021	Hjk	#4788E7	0
Hjk_S19	-0.0112	-0.1413	-0.1489	-0.0337	-0.0206	-0.0078	-0.0023	-0.0038	-0.0606	-0.0021	Hjk	#4788E7	0
Hjk_S20	-0.011	-0.1368	-0.1441	-0.0328	-0.02	-0.0076	-0.0021	-0.0036	-0.0584	-0.0018	Hjk	#4788E7	0
Hjk_S21	-0.0112	-0.1411	-0.1487	-0.0336	-0.0206	-0.0078	-0.0022	-0.0038	-0.0605	-0.0021	Hjk	#4788E7	0
Hjk_S22	-0.0112	-0.1413	-0.1489	-0.0337	-0.0206	-0.0078	-0.0023	-0.0038	-0.0606	-0.0021	Hjk	#4788E7	0
Hjk_S23	-0.011	-0.138	-0.1452	-0.033	-0.02	-0.0076	-0.0022	-0.0035	-0.0592	-0.0018	Hjk	#4788E7	0
Hjk_S24	-0.0112	-0.1411	-0.1487	-0.0336	-0.0206	-0.0078	-0.0022	-0.0038	-0.0606	-0.0021	Hjk	#4788E7	0
Hjk_S28	-0.0112	-0.1405	-0.148	-0.0335	-0.0205	-0.0078	-0.0022	-0.0038	-0.0602	-0.0021	Hjk	#4788E7	0
Hjk_S31	-0.0112	-0.1408	-0.1483	-0.0336	-0.0205	-0.0078	-0.0022	-0.0038	-0.0603	-0.0021	Hjk	#4788E7	0
Hjk_S32	-0.0112	-0.1412	-0.1488	-0.0337	-0.0206	-0.0078	-0.0022	-0.0038	-0.0606	-0.0021	Hjk	#4788E7	0
Hjk_S36	-0.0112	-0.1409	-0.1484	-0.0336	-0.0206	-0.0078	-0.0022	-0.0038	-0.0604	-0.0021	Hjk	#4788E7	0
Hjk_S3	-0.0112	-0.1408	-0.1483	-0.0336	-0.0205	-0.0078	-0.0022	-0.0038	-0.0602	-0.0021	Hjk	#4788E7	0
Hjk_S4	-0.0112	-0.1411	-0.1487	-0.0336	-0.0206	-0.0078	-0.0022	-0.0038	-0.0604	-0.0021	Hjk	#4788E7	0
Hjk_S7	-0.0112	-0.1409	-0.1484	-0.0336	-0.0205	-0.0078	-0.0023	-0.0038	-0.0603	-0.0021	Hjk	#4788E7	0
Hkg_10	-0.0079	0.002	0.0209	-0.0165	-0.015	-0.0003	0.0067	0.124	-0.0012	0.1672	Hkg	#666666	11
[truncated: 149 more rows]

## Sheet: Fig.S7
Species	Distance	Mean_r^2	Sum_r^2	NumberPairs
[truncated: 4,180 more rows]

[truncated: 1 more sheets: Fig.S12]
